# Supplementary material
Source: PubMed Central journal article supplement (PMC7785516)
Supplement: 41435_2020_120_MOESM2_ESM.pdf [file 41435_2020_120_MOESM2_ESM.pdf]

**Supplementary Table S1. The pp1ab polyprotein sequences derived from the genomes of SARS-CoV-2 sampled from multiple, distinct geographic locations.**

| S.No | Genome accession (NCBI)    | Protein accession (NCBI) | Protein Length (aa) | Collection Date (NCBI) | Locality                       |
|------|----------------------------|--------------------------|---------------------|------------------------|--------------------------------|
| 1    | NC_045512<br>(NCBI-RefSeq) | YP_009724389.1           | 7096                | 2019-12                | China                          |
| 2    | LC528232                   | BCA87360.1               | 7096                | 2020-02-10             | Japan                          |
| 3    | LC529905                   | BCB15089.1               | 7096                | 2020-01                | Japan                          |
| 4    | MN938384                   | QHN73794.1               | 7096                | 2020-01-10             | China: Shenzhen                |
| 5    | MN985325                   | QHO60603.1               | 7096                | 2020-01-19             | US:WA                          |
| 6    | MN988713                   | QHO62876.1               | 7096                | 2020-01-21             | US:IL                          |
| 7    | MN994468                   | QHQ71972.1               | 7096                | 2020-01-22             | US:CA                          |
| 8    | MN997409                   | QHQ82463.1               | 7096                | 2020-01-22             | US:AZ1                         |
| 9    | MT007544                   | QHR84448.1               | 7096                | 2020-01-25             | Australia-VIC01                |
| 10   | MT012098                   | QHS34545.1               | 7096                | 2020-02-27             | IND-Kerala-State               |
| 11   | MT020781                   | QHU79171.2               | 7096                | 2020-01-29             | FINLAND                        |
| 12   | MT039873                   | QHZ00357.1               | 7096                | 2020-01-20             | China:Hangzhou                 |
| 13   | MT039887                   | QHZ00388.1               | 7096                | 2020-01-31             | US-WI1                         |
| 14   | MT039888                   | QHZ00398.1               | 7096                | 2020-01-29             | US-MA1                         |
| 15   | MT039890                   | QHZ00378.1               | 7096                | 2020-01                | SouthKorea                     |
| 16   | MT049951                   | QIA20042.1               | 7096                | 2020-01-17             | China-Yunnan                   |
| 17   | MT066156                   | QIA98553.1               | 7096                | 2020-01-30             | Italy                          |
| 18   | MT066175                   | QIA98595.1               | 7096                | 2020-01-31             | Taiwan                         |
| 19   | MT072688                   | QIB84672.1               | 7096                | 2020-01-13             | Nepal                          |
| 20   | MT093571                   | QIC53203.1               | 7096                | 2020-02-07             | Sweden                         |
| 21   | MT106054                   | QID21067.1               | 7096                | 2020-02-11             | US-TX1                         |
| 22   | MT121215                   | QII57165.1               | 7096                | 2020-02-02             | China-Shanghai                 |
| 23   | MT123290                   | QIE07450.1               | 7096                | 2020-02-05             | China-Guangzho                 |
| 24   | MT126808                   | QIG55993.1               | 7096                | 2020-02-28             | Brazil                         |
| 25   | MT135041                   | QIH45022.1               | 7096                | 2020-01-26             | China-Beijing                  |
| 26   | MT192772                   | QIK50437.1               | 7096                | 2020-01-22             | Viet-Nam                       |
| 27   | MT240479                   | QIQ22758.1               | 7096                | 2020-03-04             | Pakistan-Gilgit                |
| 28   | MT262993                   | QIS60274.1               | 7084                | 2020-03-12             | Pakistan: KPK                  |
| 29   | MT263074                   | QIS60286.1               | 7096                | 2020-03-10             | Peru                           |
| 30   | MT276597                   | QIT06985.1               | 7096                | 2020-02                | Israel                         |
| 31   | MT276330                   | QIT06961.1               | 7096                | 2020-02-28             | USA: FL                        |
| 32   | MT276328                   | QIT06937.1               | 7096                | 2020-02-27             | USA: OR                        |
| 33   | MT292569                   | QIU78705.1               | 7096                | 2020-03-09             | Spain01                        |
| 34   | MT292574                   | QIU78765.1               | 7096                | 2020-03-02             | Spain02                        |
| 35   | MT320891                   | QIX12193.1               | 7098                | 2020-03-09             | Iran                           |
| 36   | MT320538                   | QIX12146.1               | 7096                | 2020-03                | France                         |
| 37   | MT327745                   | QIZ16507.1               | 7096                | 2020-03-17             | Turkey                         |
| 38   | MT328033                   | QIZ16545.1               | 7096                | 2020-03-18             | Greece                         |
| 39   | MT324062                   | QIZ15535.1               | 7096                | 2020-03-07             | South Africa:<br>KwaZulu-Natal |

This table depicts NCBI derived accession numbers of pp1ab polyproteins, their respective amino acid (aa) length and submission date at NCBI. Accession numbers of concerned SARS-CoV-2 genomes and source locality is also given.

**Supplementary Table S2. The pp1ab polyprotein sequences from the subfamily *Coronavirinae*, including representatives of four genera: Alphacoronavirus, Betacoronavirus, Gammacoronavirus, and Deltacoronavirus**

| S.No | Protein accession NCBI | Protein length (aa) | Name                                   | Genera          | Year |
|------|------------------------|---------------------|----------------------------------------|-----------------|------|
| 1    | NP_828849.2            | 7073                | SARS-CoV                               | Betacoronavirus | 2003 |
| 2    | YP_009047202.1         | 7078                | MERS-CoV                               | Betacoronavirus | 2012 |
| 3    | YP_009072438.1         | 7247                | Bat Hp-beta-CoV/<br>Zhejiang2013       | Betacoronavirus | 2013 |
| 4    | ATO98143.1             | 7073                | Bat SARS-like-CoV                      | Betacoronavirus | 2016 |
| 5    | AAS00002.1             | 7073                | SARS-Cov GZ02                          | Betacoronavirus | 2003 |
| 6    | QDF43824.1             | 7073                | BtRs-BetaCoV/YN2018B                   | Betacoronavirus | 2018 |
| 7    | AIA62309.1             | 7070                | BtRs-BetaCoV/HuB2013                   | Betacoronavirus | 2014 |
| 8    | AAV91630.1             | 7073                | SARS-CoV A022                          | Betacoronavirus | 2004 |
| 9    | QHR63299.1             | 7095                | BatCoV RaTG13                          | Betacoronavirus | 2020 |
| 10   | AVP78030.1             | 7092                | Bat SARS-like CoV<br>(bat-SL-CoVZC45)  | Betacoronavirus | 2018 |
| 11   | AID16715.1             | 7063                | Bat SARS-like CoV                      | Betacoronavirus | 2013 |
| 12   | AGZ48830.1             | 7073                | Bat SARS-like CoV<br>WIV1              | Betacoronavirus | 2013 |
| 13   | AAP13566.1             | 7073                | SARS CoV CUHK-W1                       | Betacoronavirus | 2003 |
| 14   | ACZ71766.1             | 7073                | SARS CoV wtic-MB                       | Betacoronavirus | 2009 |
| 15   | AAP13442.1             | 7073                | SARS CoV Urbani                        | Betacoronavirus | 2003 |
| 16   | AAR87543.1             | 7073                | SARS CoV TW4                           | Betacoronavirus | 2003 |
| 17   | ADC35510.1             | 7073                | SARS CoV HKU-39849                     | Betacoronavirus | 2010 |
| 18   | AAP33696.1             | 7073                | SARS CoV                               | Betacoronavirus | 2003 |
| 19   | ATO98130.1             | 7073                | Bat SARS-like CoV                      | Betacoronavirus | 2016 |
| 20   | AGZ48805.1             | 7073                | Bat SARS-like CoV<br>RsSHC014          | Betacoronavirus | 2013 |
| 21   | AAP30028.1             | 7073                | SARS CoV BJ01                          | Betacoronavirus | 2003 |
| 22   | AAR87587.1             | 7073                | SARS CoV TW8                           | Betacoronavirus | 2003 |
| 23   | ATO98216.1             | 7073                | Bat SARS-like CoV                      | Betacoronavirus | 2016 |
| 24   | AVP78041.1             | 7070                | Bat SARS-like CoV<br>(bat-SL-CoVZXC21) | Betacoronavirus | 2018 |
| 25   | ARI44803.1             | 7073                | Bat CoV                                | Betacoronavirus | 2017 |
| 26   | ATO98191.1             | 7073                | Bat SARS-like CoV                      | Betacoronavirus | 2016 |
| 27   | QDF43834.1             | 7073                | CoV BtRs-<br>BetaCoV/YN2018D           | Betacoronavirus | 2018 |
| 28   | QDF43829.1             | 7073                | CoV BtRs-<br>BetaCoV/YN2018C           | Betacoronavirus | 2018 |
| 29   | ATO98155.1             | 7073                | Bat SARS-like CoV                      | Betacoronavirus | 2016 |
| 30   | ATO98179.1             | 7073                | Bat SARS-like CoV                      | Betacoronavirus | 2016 |
| 31   | AFY13306.1             | 7078                | BetaCOV England 1                      | Betacoronavirus | 2013 |
| 32   | AGG22540.1             | 7078                | Human betaCOV 2c<br>England-Qatar/2012 | Betacoronavirus | 2013 |
| 33   | AGV08377.1             | 7078                | MERS-CoV                               | Betacoronavirus | 2013 |
| 34   | ASU90679.1             | 7078                | MERS-CoV                               | Betacoronavirus | 2017 |
| 35   | AHX71944.1             | 7078                | MERS-CoV                               | Betacoronavirus | 2014 |

|    |                |      |                                           |                  |      |
|----|----------------|------|-------------------------------------------|------------------|------|
| 36 | AGN72639.1     | 7078 | MERS-CoV                                  | Betacoronavirus  | 2013 |
| 37 | ALR69640.1     | 7078 | MERS-CoV                                  | Betacoronavirus  | 2015 |
| 38 | AIY60526.1     | 7078 | MERS-CoV                                  | Betacoronavirus  | 2014 |
| 39 | ASU90338.1     | 7078 | MERS-CoV                                  | Betacoronavirus  | 2017 |
| 40 | ALX27230.1     | 7078 | MERS-CoV                                  | Betacoronavirus  | 2015 |
| 41 | AHB33324.1     | 7078 | MERS-CoV                                  | Betacoronavirus  | 2013 |
| 42 | YP_009555238.1 | 7095 | Human CoV-OC43                            | Betacoronavirus  | 2019 |
| 43 | AAR01012.1     | 7095 | Human CoV-OC43                            | Betacoronavirus  | 2003 |
| 44 | AGT51508.1     | 7095 | Human CoV-OC43                            | Betacoronavirus  | 2013 |
| 45 | AEN19363.1     | 7095 | Human CoV-OC43                            | Betacoronavirus  | 2011 |
| 46 | AXX83342.1     | 7095 | Human CoV-OC43                            | Betacoronavirus  | 2017 |
| 47 | AXX83348.1     | 7095 | Human CoV-OC43                            | Betacoronavirus  | 2017 |
| 48 | YP_001552234.1 | 6727 | Rhinolophus bat CoV HKU2                  | Alphacoronavirus | 2007 |
| 49 | ABQ57215.1     | 6727 | Rhinolophus bat CoV HKU2                  | Alphacoronavirus | 2007 |
| 50 | ABQ57223.1     | 6727 | Rhinolophus bat CoV HKU2                  | Alphacoronavirus | 2007 |
| 51 | AVM80490.1     | 6728 | Swine acute diarrhea syndrome related CoV | Coronavirinae    | 2017 |
| 52 | AXY04090.1     | 6728 | Swine acute diarrhea syndrome CoV         | Coronavirinae    | 2017 |
| 53 | QID98967.1     | 6728 | Swine acute diarrhea syndrome CoV         | Coronavirinae    | 2019 |
| 54 | ATN23888.1     | 6728 | Rhinolophus bat CoV HKU2                  | Alphacoronavirus | 2017 |
| 55 | AWJ64262.1     | 6728 | Porcine enteric alphaCoV                  | Alphacoronavirus | 2018 |
| 56 | QCX35177.1     | 6712 | Rhinolophus bat CoV HKU32                 | Alphacoronavirus | 2019 |
| 57 | AFU92130.1     | 6783 | Hipposideros bat CoV HKU10                | Alphacoronavirus | 2012 |
| 58 | ALA50248.1     | 6763 | Camel alphaCoV                            | Alphacoronavirus | 2015 |
| 59 | ARQ03268.1     | 6781 | Porcine epidemic diarrhea virus           | Alphacoronavirus | 2017 |
| 60 | ADE34765.1     | 7071 | Bat SARS CoV HKU3-8                       | Betacoronavirus  | 2009 |
| 61 | AKZ19085.1     | 7073 | Bat SARS-like CoV YNLF_34C                | Betacoronavirus  | 2015 |
| 62 | AIA62319.1     | 7071 | BtRs-BetaCoV/GX2013                       | Betacoronavirus  | 2014 |
| 63 | AAU04648.1     | 7073 | SARS CoV civet010                         | Betacoronavirus  | 2004 |
| 64 | AAU04645.1     | 7073 | Civet SARS CoV 007/2004                   | Betacoronavirus  | 2004 |
| 65 | AAT76146.1     | 7073 | SARS CoV TJF                              | Betacoronavirus  | 2004 |
| 66 | AIA62329.1     | 7073 | BtRs-BetaCoV/YN2013                       | Betacoronavirus  | 2014 |
| 67 | ADV71823.1     | 6630 | Infectious bronchitis virus               | Gammacoronavirus | 2010 |
| 68 | ADV71773.1     | 6630 | Infectious bronchitis virus               | Gammacoronavirus | 2010 |
| 69 | ADA83476.1     | 6630 | Infectious bronchitis virus-Mass41        | Gammacoronavirus | 2009 |
| 70 | CAZ86697.1     | 6631 | Infectious bronchitis virus               | Gammacoronavirus | 2009 |

|    |                |      |                                |                  |      |
|----|----------------|------|--------------------------------|------------------|------|
|    |                |      | ITA/90254/2005                 |                  |      |
| 71 | QGM12427.1     | 6639 | Infectious<br>bronchitis virus | Gammacoronavirus | 2019 |
| 72 | QDQ69145.1     | 6627 | Infectious<br>bronchitis virus | Gammacoronavirus | 2019 |
| 73 | QDQ69119.1     | 6623 | Infectious<br>bronchitis virus | Gammacoronavirus | 2019 |
| 74 | AUH28256.1     | 6265 | Porcine delta CoV              | Coronavirinae    | 2017 |
| 75 | ASR75147.1     | 6265 | Porcine delta CoV              | Coronavirinae    | 2017 |
| 76 | AKC54434.1     | 6267 | Porcine delta CoV              | Deltacoronavirus | 2015 |
| 77 | QDH76194.1     | 6265 | Porcine delta CoV              | Deltacoronavirus | 2019 |
| 78 | BAY00729.1     | 6262 | Coronavirus HKU15              | Coronavirinae    | 2017 |
| 79 | YP_005352845.1 | 6277 | Sparrow CoV HKU17              | Deltacoronavirus | 2011 |
| 80 | AXP20280.1     | 6260 | Quail delta CoV                | Deltacoronavirus | 2018 |
| 81 | YP_005352853.1 | 6253 | Magpie-robin CoV<br>HKU18      | Deltacoronavirus | 2011 |
| 82 | YP_002308505.1 | 6307 | Munia CoV HKU13-3514           | Deltacoronavirus | 2008 |
| 83 | YP_003858583.1 | 7064 | Bat-CoV: BM48-<br>31/BGR/2008  | Unclassified     | 2009 |

This table depicts the NCBI (National Center for Bioinformatics) derived accession numbers of pp1ab polyproteins, their amino acid (aa) length, defined name in literature and taxonomic classification. Dates of submission in NCBI are also given in the last column. Note: The list of corresponding homologous sequences from SARS-CoV-2 are given in Table 1.

**Supplementary Table S3. Fixed amino acid substitutions in polyprotein pp1ab of SARS-CoV-2.**

| S.No | Amino Acid Position | Bat-SL-CoV (AVP78030.1/AVP78041.1) | Bat-CoV-RaTG13 (QHR63299.1) | SARS-CoV-2 (YP_009725299.1) | Neutral/Radical   | Localization                         |
|------|---------------------|------------------------------------|-----------------------------|-----------------------------|-------------------|--------------------------------------|
| 1    | 38                  | A                                  | A                           | V                           | Neutral (0)       | nsp1 (leader protein)                |
| 2    | 93                  | D                                  | N                           | E                           | Neutral (0)       | nsp1 (leader protein)                |
| 3    | 114                 | V                                  | T                           | I                           | Radical (-1)      | nsp1 (leader protein)                |
| 4    | 280                 | T                                  | T                           | I                           | Radical (-1)      | nsp2                                 |
| 5    | 376                 | P                                  | P                           | S                           | Radical (-1)      | nsp2                                 |
| 6    | 417                 | Y                                  | Y                           | H                           | Radical (+2)      | nsp2                                 |
| 7    | 498                 | T                                  | T                           | A                           | Neutral (0)       | nsp2                                 |
| 8    | 591                 | V                                  | V                           | A                           | Neutral (0)       | nsp2                                 |
| 9    | 859                 | S/N                                | T                           | A                           | Neutral (0)       | nsp3                                 |
| 10   | 940                 | Q                                  | D                           | E                           | Radical (+2)      | nsp3                                 |
| 11   | 967                 | F                                  | V                           | A                           | Neutral (0)       | nsp3                                 |
| 12   | 968                 | S                                  | T                           | A                           | Neutral (0)       | nsp3                                 |
| 13   | 969                 | S                                  | P                           | L                           | Radical (-3)      | nsp3                                 |
| 14   | 991                 | -                                  | E                           | Q                           | Radical (+2)      | nsp3                                 |
| 15   | 993                 | A                                  | D                           | G                           | Radical (-1)      | nsp3                                 |
| 16   | 996                 | -                                  | V                           | D                           | Radical (-3)      | nsp3                                 |
| 17   | 1001                | N                                  | I                           | T                           | Radical (-1)      | nsp3                                 |
| 18   | 1002                | K                                  | T                           | I                           | Radical (-1)      | nsp3                                 |
| 19   | 1004                | P                                  | S                           | T                           | Radical (+1)      | nsp3                                 |
| 20   | 1016                | S                                  | P                           | L                           | Radical (-3)      | nsp3                                 |
| 21   | 1023                | S                                  | -                           | I                           | Radical (-2)      | nsp3                                 |
| 22   | 1089                | S/K                                | H                           | D                           | Radical (-1)      | nsp3                                 |
| 23   | 1113                | N                                  | N                           | H                           | Radical (+1)      | nsp3                                 |
| 24   | 1124                | R                                  | R                           | K                           | Radical (+2)      | nsp3                                 |
| 25   | 1159                | V                                  | V                           | I                           | Radical (+3)      | nsp3                                 |
| 26   | 1203                | T                                  | T                           | I                           | Radical (-1)      | nsp3                                 |
| 27   | 1226                | Q                                  | Q                           | K                           | Radical (+1)      | nsp3                                 |
| 28   | 1228                | A                                  | V                           | D                           | Radical (-3)      | nsp3                                 |
| 29   | 1272                | K                                  | N                           | S                           | Radical (+1)      | nsp3                                 |
| 30   | 1393                | M                                  | M                           | V                           | Radical (+1)      | nsp3                                 |
| 31   | 1733                | N                                  | N                           | S                           | Radical (+1)      | nsp3                                 |
| 32   | 1779                | L                                  | L                           | F                           | Neutral (0)       | nsp3                                 |
| 33   | 1795                | Q                                  | Q                           | K                           | Radical (+1)      | nsp3                                 |
| 34   | 1822                | V                                  | I                           | T                           | Radical (-1)      | nsp3                                 |
| 35   | 2033                | T                                  | T                           | A                           | Neutral (0)       | nsp3                                 |
| 36   | 2061                | I                                  | I                           | V                           | Radical (+3)      | nsp3                                 |
| 37   | 2082                | D                                  | D                           | N                           | Radical (+1)      | nsp3                                 |
| 38   | 2083                | G                                  | G                           | S                           | Neutral (0)       | nsp3                                 |
| 39   | 2405                | T                                  | T                           | N                           | Neutral (0)       | nsp3                                 |
| 40   | 3143                | V                                  | V                           | A                           | Neutral (0)       | nsp4                                 |
| 41   | 3145                | V                                  | V                           | I                           | Radical (+3)      | nsp4                                 |
| 42   | 3443                | T                                  | T                           | N                           | Neutral (0)       | 3C-like proteinase (nsp5)            |
| 43   | 3606                | V                                  | V                           | F/L                         | Radical (-1)/(+1) | nsp6                                 |
| 44   | 4590                | D                                  | D                           | N                           | Radical (+1)      | RNA-dependent RNA polymerase (nsp12) |
| 45   | 4625                | I                                  | I                           | V                           | Radical (+3)      | RNA-dependent RNA polymerase (nsp12) |
| 46   | 6137                | K                                  | K                           | R                           | Radical (+2)      | 3'-to-5' exonuclease (nsp14)         |
| 47   | 6184                | Q                                  | R                           | L                           | Radical (-2)      | 3'-to-5' exonuclease (nsp14)         |
| 48   | 6566                | N/S                                | N                           | T                           | Neutral (0)       | endoRNase (nsp15)                    |
| 49   | 6580                | E                                  | N                           | D                           | Neutral (0)       | endoRNase (nsp15)                    |
| 50   | 6653                | E                                  | K                           | Q                           | Radical (+1)      | endoRNase (nsp15)                    |
| 51   | 6695                | G                                  | R                           | S                           | Radical (-1)      | endoRNase (nsp15)                    |
| 52   | 6710                | S                                  | S                           | F                           | Radical (-2)      | endoRNase (nsp15)                    |
| 53   | 6715                | L                                  | L                           | F                           | Neutral (0)       | endoRNase (nsp15)                    |

This table shows the SARS-CoV-2 specific replacements in polyprotein pp1ab since its divergence from bat coronaviruses. The 6<sup>th</sup> column illustrates the putative physicochemical impact of each substitution on protein structure and function. The numbers in the brackets are the log-odds score for each substitution that is prophesied according to BLOSUM 62 substitution matrix. Negative number indicates less likely substitution while positive number point toward preferred substitutions. The 7<sup>th</sup> column symbolizes the protein name where particular substitution resides. Amino acid positions in the second column are according to SARS-CoV-2 pp1ab.

**Supplementary Table S4. Intra-clade comparison of fixed Amino acid substitutions in nsp3 of SARS-CoV-2**

| S.No | Amino Acid position-orf1ab | Amino Acid position-nsp3 | YP_009725299.1 | G | GH | GR | L | O | S | V |
|------|----------------------------|--------------------------|----------------|---|----|----|---|---|---|---|
| 1    | 859                        | 41                       | A              | A | A  | A  | A | A | A | A |
| 2    | 940                        | 123                      | E              | E | E  | E  | E | E | E | E |
| 3    | 967                        | 149                      | A              | A | A  | A  | A | A | A | A |
| 4    | 968                        | 150                      | A              | A | A  | A  | A | A | A | A |
| 5    | 969                        | 151                      | L              | L | L  | L  | L | L | L | L |
| 6    | 991                        | 173                      | Q              | Q | Q  | Q  | Q | Q | Q | Q |
| 7    | 993                        | 175                      | G              | G | G  | G  | G | G | G | G |
| 8    | 996                        | 178                      | D              | D | D  | D  | D | D | D | D |
| 9    | 1001                       | 183                      | T              | T | T  | T  | T | T | T | T |
| 10   | 1002                       | 184                      | I              | I | I  | I  | I | I | I | I |
| 11   | 1004                       | 186                      | T              | T | T  | T  | T | T | T | T |
| 12   | 1016                       | 198                      | L              | L | L  | L  | L | L | L | L |
| 13   | 1023                       | 205                      | I              | I | I  | I  | I | I | I | I |
| 14   | 1089                       | 271                      | D              | D | D  | D  | D | D | D | D |
| 15   | 1113                       | 295                      | H              | H | H  | H  | H | H | H | H |
| 16   | 1124                       | 306                      | K              | K | K  | K  | K | K | K | K |
| 17   | 1159                       | 341                      | I              | I | I  | I  | I | I | I | I |
| 18   | 1203                       | 385                      | I              | I | I  | I  | I | I | I | I |
| 19   | 1226                       | 408                      | K              | K | K  | K  | K | K | K | K |
| 20   | 1228                       | 410                      | D              | D | D  | D  | D | D | D | D |
| 21   | 1272                       | 454                      | S              | S | S  | S  | S | S | S | S |
| 22   | 1393                       | 575                      | V              | V | V  | V  | V | V | V | V |
| 23   | 1733                       | 905                      | S              | S | S  | S  | S | S | S | S |
| 24   | 1779                       | 961                      | F              | F | F  | F  | F | F | F | F |
| 25   | 1795                       | 977                      | K              | K | K  | K  | K | K | K | K |
| 26   | 1822                       | 1004                     | T              | T | T  | T  | T | T | T | T |
| 27   | 2033                       | 1205                     | A              | A | A  | A  | A | A | A | A |
| 28   | 2061                       | 1243                     | V              | V | V  | V  | V | V | V | V |
| 29   | 2082                       | 1264                     | N              | N | N  | N  | N | N | N | N |
| 30   | 2083                       | 1265                     | S              | S | S  | S  | S | S | S | S |
| 31   | 2405                       | 1587                     | N              | N | N  | N  | N | N | N | N |

This table shows the intra clade comparison of SARS-CoV-2 specific replacements in nsp3 since its divergence from bat coronaviruses. The putative physicochemical impact of amino acid substitution in column 4 on protein structure and function are given in supplementary table S3. Column 2 and 3 depicts the position of these residues with respect to orf1ab and nsp3 respectively. G, GH,GR, L, O ,S and V are seven distinct clades of SARS-CoV-2 reported in GISAID (<https://www.gisaid.org>). Green highlighted sections depict amino acid replacements in the macrodomains of SARS-CoV-2.

**Supplementary Table S5. Fixed amino acid replacements in the macrodomains of SARS-CoV-2.**

| S.No | Substitution Positions | Domain type              | Neutral/Radical | Impact on protein stability ( $\Delta\Delta G$ ) |
|------|------------------------|--------------------------|-----------------|--------------------------------------------------|
| 1    | N295H                  | Macrodomain-1 (X domain) | Radical (+1)    | Destabilizing (-0.396)                           |
| 2    | R306K                  | Macrodomain-1 (X domain) | Radical (+2)    | Destabilizing (-0.586)                           |
| 3    | V341I                  | Macrodomain-1 (X domain) | Radical (+3)    | Destabilizing (-0.035)                           |
| 4    | T385I                  | Macrodomain-2            | Radical (-1)    | Destabilizing (-1.803)                           |
| 5    | Q408K                  | Macrodomain-2            | Radical (+1)    | Destabilizing (-0.604)                           |
| 6    | V410D                  | Macrodomain-2            | Radical (-3)    | Destabilizing (-0.29)                            |
| 7    | N454S                  | Macrodomain-2            | Radical (+1)    | Destabilizing (-0.849)                           |
| 8    | M575V                  | Macrodomain-3            | Radical (+1)    | Destabilizing (-0.392)                           |

After splitting from bat SARS-CoVs (RaTG13/ZC45/ZXC21), macrodomains of SARS-CoV-2 (YP\_009725299.1) have experienced in total eight fixed amino acid replacements. This table depicts positions of these replacements (with respect to Nsp3 protein), their location within specific macrodomain sub-types. The 4th column depicts the putative physicochemical impact of each replacement on protein/structure function, the number within brackets are the log odds associated with changing the amino acids. Positive numbers imply a preferred change, zero implies a neutral change and negative numbers imply an un-preferred change. The 5th column depicts the putative impact of each replacement on the stability of protein structure. The number within brackets depicts the protein stability free energy change ( $\Delta\Delta G$ ) upon single amino acid substitution.  $\Delta\Delta G$  (kcal/mole) is calculated by using structure information. Positive values imply an increase in the stability of protein structure. Conversely, negative numbers imply a decrease in the stability of protein structure.

**Supplementary Table S6. Comparison of secondary structure elements (SSEs) in macrodomains.**

| Coronavirus                                    | SSEs Type             |                       |                       |
|------------------------------------------------|-----------------------|-----------------------|-----------------------|
|                                                | Alpha helix           | Beta Sheets           | Random coils          |
| SARS-CoV2<br>(YP_009725299.1)                  | 38.56% (209 residues) | 23.06% (125 residues) | 38.38% (208 residues) |
| bat-RaTG13<br>(QHR63299.1)                     | 40.85% (221 residues) | 22.37% (121 residues) | 36.79% (199 residues) |
| SARS-CoV<br>(BJ01:AAP30028.1)                  | 37.15% (198 residues) | 19.14% (102 residues) | 43.71% (237 residues) |
| Ancestor: SARS-CoV-2 and bat-RaTG13/ZC45/ZXC21 | 38.31% (208 residues) | 21.36% (116 residues) | 40.33% (219 residues) |

This table summarizes the differences in % population of the SSEs in macrodomains of various coronaviruses (CoVs) listed in the first column. The GenBank accession number of the protein sequence is given within brackets; first column. The Number within brackets in the second, third and fourth column depicts the total number of amino acid residues occupied by each SSE type.



**Supplementary Table S7. Structural deviations in the backbone torsion angles of the macrodomain-1 and macrodomain-2**

| 3D-superimposition of protein structures between lineages | Major changes in the backbone torsion angles( $\Phi^\circ, \Psi^\circ$ )residue numbers) |                            | Noticeable changes in secondary structural elements (SSEs) |                                                      |
|-----------------------------------------------------------|------------------------------------------------------------------------------------------|----------------------------|------------------------------------------------------------|------------------------------------------------------|
|                                                           | Macrodomain-1                                                                            | Macrodomain-2              | Macrodomain-1                                              | Macrodomain-2                                        |
| Ancestor vs SARS-CoV-2                                    | 11-16, 100-106                                                                           | 199-236, 272-279, 305-312, | 10-11, 78-80, 130-133, 156-168,                            | 222-226, 246-252, 268-273, 279-285, 291-293, 301-304 |
| bat-RaTG13 vs SARS-CoV-2                                  | 4-16, 20-22, 39-48                                                                       | 209-222, 323-327,          | 10-11, 27-29, 78-80, 118-120, 156-168,                     | 222-226, 237-238, 246-252, 268-273, 307-309          |
| SARS-CoV vs SARS-CoV-2                                    | 11-16, 18-22, 161-168                                                                    | 199-245                    | 11-16, 161-168                                             | 200-204, 222-226, 308-310,                           |
| MERS-CoV vs SARS-CoV-2                                    | 1-5, 25-32, 82-91,                                                                       | -                          | 1-9, 78-80, 97-101,                                        | -                                                    |

The 2nd and 3rd columns of this table shows the effect of lineage specific substitutions on the backbone torsion angles of SARS-CoV-2 (YP\_009725299.1) macrodomains (Macrodomain 1 and Macrodomain 2) in comparison with corresponding macrodomains of bat-RaTG13 (QHR63299.1), SARS-CoV (BJ01:AAP30028.1), MERS-CoV (PDB entry: 5HOL) and predicted ancestor of SARS-CoV-2 and bat-RaTG13/ZC45/ZXC21. 5th and 6th columns show the residue positions for noticeable transitions in SSEs within Macrodomain 1 and Macrodomain 2 of SARS-CoV-2, in comparison with corresponding homologous macrodomains of bat-RaTG13 (QHR63299.1), SARS-CoV (BJ01:AAP30028.1), MERS-CoV (PDB entry: 5DUS) and predicted ancestor of SARS-CoV-2 and bat-RaTG13/ZC45/ZXC21. Note: MERS-CoV genome does not code for macrodomain-2 and hence not analyzed here.

**Supplementary Table S8. ADPr-binding pattern of macrodomain-1**

| S. No | Virus type                     | Interacting residues with ADPr                                                 | Docking Score (kcal/mol) |
|-------|--------------------------------|--------------------------------------------------------------------------------|--------------------------|
| 1     | MERS-CoV<br>(PDB entry: 5DUS)  | Asp20, Ile21, Lys42,<br>Gly44, Gly46, Ala48, Ser126,<br>Gly128, Ile129         | -9.70                    |
| 2     | SARS-CoV-2<br>(YP_009725299.1) | Asp22, Ile23, Asn40, Gly46,<br>Val49, Ala50, Ser128,<br>Phe132, Ile131, Phe156 | -9.46                    |
| 3     | SARS-CoV<br>(PDB entry: 2FAV)  | Asp23, Asn41, Gly47, Val50,<br>Ala51, Gly131                                   | -8.59                    |

This table shows the results of molecular docking of ADP-ribose molecule with the macrodomain-1 of different coronaviruses. Amino acid residues of macrodomain-1 which are actively involved in the hydrogen bonding with the ADP-ribose molecule are given in the 3rd column. The docking scores (kcal/mol) are given in the 4th column. The lowest the docking score the higher is the binding affinity. ADPr; adenosine diphosphate (ADP)-ribose.

**Supplementary Table S9: Predicted features (Volume, Surface area and Drug score) of the MERS-CoV, SARS-CoV and SARs-CoV-2 macrodomain-I.**

| <b>Virus type</b>              | <b>Volume (<math>\text{\AA}^3</math>)</b> | <b>Surface Area (<math>\text{\AA}^2</math>)</b> | <b>Druggability score</b> |
|--------------------------------|-------------------------------------------|-------------------------------------------------|---------------------------|
| MERS-CoV<br>(PDB entry: 5DUS)  | 733.31                                    | 873.7                                           | 0.82                      |
| SARs-CoV-2<br>(YP_009725299.1) | 705.02                                    | 765.66                                          | 0.81                      |
| SARS-CoV<br>(PDB entry: 2FAV)  | 697.6                                     | 888.71                                          | 0.79                      |

This table shows comparison of volume and surface area and druggability scores of the binding cleft of Mac1 of three coronaviruses. The higher the druggability score the more druggable the binding pocket is.
