# Supplementary material
Source: PubMed Central journal article supplement (PMC7785516)
Supplement: 41435_2020_120_MOESM3_ESM.pdf [file 41435_2020_120_MOESM3_ESM.pdf]

Supplementary Alignment File: Concatenated alignments of 126 sequences (polyprotein pp1ab/Orfab of SARS-CoV-2) from 7 distinct clades (G, GH,GR, L, O ,S and V) of SARS-CoV-2 reported in GISAID (<https://www.gisaid.org>). Alignment (rich text format) of each distinct clade is represented by 18 sequences. Black highlighted residues represent Nsp3 protein.

## Clade G

```
ORF1ab 1 MESLVPGFNEKTHVQLSLPVLQVRDVLVRGFGDSVEEVLSEARQHLKDGTCGLVEVEKGV
EPI_ISL_413575 1 -----
EPI_ISL_413588 1 -----
EPI_ISL_413589 1 -----
EPI_ISL_424221 1 -----
EPI_ISL_424233 1 -----
EPI_ISL_424236 1 -----
EPI_ISL_424238 1 -----
EPI_ISL_424248 1 -----
EPI_ISL_424254 1 -----
EPI_ISL_425548 1 -----
EPI_ISL_425581 1 -----
EPI_ISL_426881 1 -----
EPI_ISL_426883 1 -----
EPI_ISL_426888 1 -----
EPI_ISL_426900 1 -----
EPI_ISL_426901 1 -----
EPI_ISL_426903 1 -----
EPI_ISL_426904 1 -----
EPI_ISL_426907 1 -----
EPI_ISL_426910 1 -----
ORF1ab 1 MESLVPGFNEKTHVQLSLPVLQVRDVLVRGFGDSVEEVLSEARQHLKDGTCGLVEVEKGV
EPI_ISL_413575 1 -----
EPI_ISL_413588 1 -----
EPI_ISL_413589 1 -----
EPI_ISL_424221 1 -----
EPI_ISL_424233 1 -----
EPI_ISL_424236 1 -----
EPI_ISL_424238 1 -----
EPI_ISL_424248 1 -----
EPI_ISL_424254 1 -----
EPI_ISL_425548 1 -----
EPI_ISL_425581 1 -----
EPI_ISL_426881 1 -----
EPI_ISL_426883 1 -----
EPI_ISL_426888 1 -----
EPI_ISL_426900 1 -----
EPI_ISL_426901 1 -----
EPI_ISL_426903 1 -----
EPI_ISL_426904 1 -----
EPI_ISL_426907 1 -----
EPI_ISL_426910 1 -----
```

|                |    |                                                                  |
|----------------|----|------------------------------------------------------------------|
| ORF1ab         | 61 | LPQLEQPYVFIKRS DARTAPHG HVMVELVAELEG IQGRSGETLGV LVPHVGEI PVAYRK |
| EPI_ISL_413575 | 1  | -----                                                            |
| EPI_ISL_413588 | 1  | -----                                                            |
| EPI_ISL_413589 | 1  | -----                                                            |
| EPI_ISL_424221 | 1  | -----                                                            |
| EPI_ISL_424233 | 1  | -----                                                            |
| EPI_ISL_424236 | 1  | -----                                                            |
| EPI_ISL_424238 | 1  | -----                                                            |
| EPI_ISL_424248 | 1  | -----                                                            |
| EPI_ISL_424254 | 1  | -----                                                            |
| EPI_ISL_425548 | 1  | -----                                                            |
| EPI_ISL_425581 | 1  | -----                                                            |
| EPI_ISL_426881 | 1  | -----                                                            |
| EPI_ISL_426883 | 1  | -----                                                            |
| EPI_ISL_426888 | 1  | -----                                                            |
| EPI_ISL_426900 | 1  | -----                                                            |
| EPI_ISL_426901 | 1  | -----                                                            |
| EPI_ISL_426903 | 1  | -----                                                            |
| EPI_ISL_426904 | 1  | -----                                                            |
| EPI_ISL_426907 | 1  | -----                                                            |
| EPI_ISL_426910 | 1  | -----                                                            |
| ORF1ab         | 61 | LPQLEQPYVFIKRS DARTAPHG HVMVELVAELEG IQGRSGETLGV LVPHVGEI PVAYRK |
| EPI_ISL_413575 | 1  | -----                                                            |
| EPI_ISL_413588 | 1  | -----                                                            |
| EPI_ISL_413589 | 1  | -----                                                            |
| EPI_ISL_424221 | 1  | -----                                                            |
| EPI_ISL_424233 | 1  | -----                                                            |
| EPI_ISL_424236 | 1  | -----                                                            |
| EPI_ISL_424238 | 1  | -----                                                            |
| EPI_ISL_424248 | 1  | -----                                                            |
| EPI_ISL_424254 | 1  | -----                                                            |
| EPI_ISL_425548 | 1  | -----                                                            |
| EPI_ISL_425581 | 1  | -----                                                            |
| EPI_ISL_426881 | 1  | -----                                                            |
| EPI_ISL_426883 | 1  | -----                                                            |
| EPI_ISL_426888 | 1  | -----                                                            |
| EPI_ISL_426900 | 1  | -----                                                            |
| EPI_ISL_426901 | 1  | -----                                                            |
| EPI_ISL_426903 | 1  | -----                                                            |
| EPI_ISL_426904 | 1  | -----                                                            |
| EPI_ISL_426907 | 1  | -----                                                            |
| EPI_ISL_426910 | 1  | -----                                                            |

|                |     |                                                                |
|----------------|-----|----------------------------------------------------------------|
| ORF1ab         | 121 | VLLRKNGNKGAGGHSYGADLKSF DLGDELGTD PYEDFQENWNTKHSSGVTRELMRELNGG |
| EPI_ISL_413575 | 1   | -----                                                          |
| EPI_ISL_413588 | 1   | -----                                                          |
| EPI_ISL_413589 | 1   | -----                                                          |
| EPI_ISL_424221 | 1   | -----                                                          |
| EPI_ISL_424233 | 1   | -----                                                          |
| EPI_ISL_424236 | 1   | -----                                                          |
| EPI_ISL_424238 | 1   | -----                                                          |
| EPI_ISL_424248 | 1   | -----                                                          |
| EPI_ISL_424254 | 1   | -----                                                          |
| EPI_ISL_425548 | 1   | -----                                                          |
| EPI_ISL_425581 | 1   | -----                                                          |
| EPI_ISL_426881 | 1   | -----                                                          |
| EPI_ISL_426883 | 1   | -----                                                          |
| EPI_ISL_426888 | 1   | -----                                                          |
| EPI_ISL_426900 | 1   | -----                                                          |
| EPI_ISL_426901 | 1   | -----                                                          |
| EPI_ISL_426903 | 1   | -----                                                          |
| EPI_ISL_426904 | 1   | -----                                                          |
| EPI_ISL_426907 | 1   | -----                                                          |
| EPI_ISL_426910 | 1   | -----                                                          |
| ORF1ab         | 121 | VLLRKNGNKGAGGHSYGADLKSF DLGDELGTD PYEDFQENWNTKHSSGVTRELMRELNGG |
| EPI_ISL_413575 | 1   | -----                                                          |
| EPI_ISL_413588 | 1   | -----                                                          |
| EPI_ISL_413589 | 1   | -----                                                          |
| EPI_ISL_424221 | 1   | -----                                                          |
| EPI_ISL_424233 | 1   | -----                                                          |
| EPI_ISL_424236 | 1   | -----                                                          |
| EPI_ISL_424238 | 1   | -----                                                          |
| EPI_ISL_424248 | 1   | -----                                                          |
| EPI_ISL_424254 | 1   | -----                                                          |
| EPI_ISL_425548 | 1   | -----                                                          |
| EPI_ISL_425581 | 1   | -----                                                          |
| EPI_ISL_426881 | 1   | -----                                                          |
| EPI_ISL_426883 | 1   | -----                                                          |
| EPI_ISL_426888 | 1   | -----                                                          |
| EPI_ISL_426900 | 1   | -----                                                          |
| EPI_ISL_426901 | 1   | -----                                                          |
| EPI_ISL_426903 | 1   | -----                                                          |
| EPI_ISL_426904 | 1   | -----                                                          |
| EPI_ISL_426907 | 1   | -----                                                          |
| EPI_ISL_426910 | 1   | -----                                                          |

|                |     |                                                              |
|----------------|-----|--------------------------------------------------------------|
| ORF1ab         | 181 | AYTRYVDNNFCGPDGYPLECIKDLLARAGKASCTLSEQLDFIDTKRGVYCCREHEHEIAW |
| EPI_ISL_413575 | 1   | -----                                                        |
| EPI_ISL_413588 | 1   | -----                                                        |
| EPI_ISL_413589 | 1   | -----                                                        |
| EPI_ISL_424221 | 1   | -----                                                        |
| EPI_ISL_424233 | 1   | -----                                                        |
| EPI_ISL_424236 | 1   | -----                                                        |
| EPI_ISL_424238 | 1   | -----                                                        |
| EPI_ISL_424248 | 1   | -----                                                        |
| EPI_ISL_424254 | 1   | -----                                                        |
| EPI_ISL_425548 | 1   | -----                                                        |
| EPI_ISL_425581 | 1   | -----                                                        |
| EPI_ISL_426881 | 1   | -----                                                        |
| EPI_ISL_426883 | 1   | -----                                                        |
| EPI_ISL_426888 | 1   | -----                                                        |
| EPI_ISL_426900 | 1   | -----                                                        |
| EPI_ISL_426901 | 1   | -----                                                        |
| EPI_ISL_426903 | 1   | -----                                                        |
| EPI_ISL_426904 | 1   | -----                                                        |
| EPI_ISL_426907 | 1   | -----                                                        |
| EPI_ISL_426910 | 1   | -----                                                        |
| ORF1ab         | 181 | AYTRYVDNNFCGPDGYPLECIKDLLARAGKASCTLSEQLDFIDTKRGVYCCREHEHEIAW |
| EPI_ISL_413575 | 1   | -----                                                        |
| EPI_ISL_413588 | 1   | -----                                                        |
| EPI_ISL_413589 | 1   | -----                                                        |
| EPI_ISL_424221 | 1   | -----                                                        |
| EPI_ISL_424233 | 1   | -----                                                        |
| EPI_ISL_424236 | 1   | -----                                                        |
| EPI_ISL_424238 | 1   | -----                                                        |
| EPI_ISL_424248 | 1   | -----                                                        |
| EPI_ISL_424254 | 1   | -----                                                        |
| EPI_ISL_425548 | 1   | -----                                                        |
| EPI_ISL_425581 | 1   | -----                                                        |
| EPI_ISL_426881 | 1   | -----                                                        |
| EPI_ISL_426883 | 1   | -----                                                        |
| EPI_ISL_426888 | 1   | -----                                                        |
| EPI_ISL_426900 | 1   | -----                                                        |
| EPI_ISL_426901 | 1   | -----                                                        |
| EPI_ISL_426903 | 1   | -----                                                        |
| EPI_ISL_426904 | 1   | -----                                                        |
| EPI_ISL_426907 | 1   | -----                                                        |
| EPI_ISL_426910 | 1   | -----                                                        |

|                |     |                                                              |
|----------------|-----|--------------------------------------------------------------|
| ORF1ab         | 241 | YTERSEKSYELQTPFEIKLAKKFDTFNGECPNFVFPLNSIIKTIQPRVEKKKLDGFMGRI |
| EPI_ISL_413575 | 1   | -----                                                        |
| EPI_ISL_413588 | 1   | -----                                                        |
| EPI_ISL_413589 | 1   | -----                                                        |
| EPI_ISL_424221 | 1   | -----                                                        |
| EPI_ISL_424233 | 1   | -----                                                        |
| EPI_ISL_424236 | 1   | -----                                                        |
| EPI_ISL_424238 | 1   | -----                                                        |
| EPI_ISL_424248 | 1   | -----                                                        |
| EPI_ISL_424254 | 1   | -----                                                        |
| EPI_ISL_425548 | 1   | -----                                                        |
| EPI_ISL_425581 | 1   | -----                                                        |
| EPI_ISL_426881 | 1   | -----                                                        |
| EPI_ISL_426883 | 1   | -----                                                        |
| EPI_ISL_426888 | 1   | -----                                                        |
| EPI_ISL_426900 | 1   | -----                                                        |
| EPI_ISL_426901 | 1   | -----                                                        |
| EPI_ISL_426903 | 1   | -----                                                        |
| EPI_ISL_426904 | 1   | -----                                                        |
| EPI_ISL_426907 | 1   | -----                                                        |
| EPI_ISL_426910 | 1   | -----                                                        |
| ORF1ab         | 241 | YTERSEKSYELQTPFEIKLAKKFDTFNGECPNFVFPLNSIIKTIQPRVEKKKLDGFMGRI |
| EPI_ISL_413575 | 1   | -----                                                        |
| EPI_ISL_413588 | 1   | -----                                                        |
| EPI_ISL_413589 | 1   | -----                                                        |
| EPI_ISL_424221 | 1   | -----                                                        |
| EPI_ISL_424233 | 1   | -----                                                        |
| EPI_ISL_424236 | 1   | -----                                                        |
| EPI_ISL_424238 | 1   | -----                                                        |
| EPI_ISL_424248 | 1   | -----                                                        |
| EPI_ISL_424254 | 1   | -----                                                        |
| EPI_ISL_425548 | 1   | -----                                                        |
| EPI_ISL_425581 | 1   | -----                                                        |
| EPI_ISL_426881 | 1   | -----                                                        |
| EPI_ISL_426883 | 1   | -----                                                        |
| EPI_ISL_426888 | 1   | -----                                                        |
| EPI_ISL_426900 | 1   | -----                                                        |
| EPI_ISL_426901 | 1   | -----                                                        |
| EPI_ISL_426903 | 1   | -----                                                        |
| EPI_ISL_426904 | 1   | -----                                                        |
| EPI_ISL_426907 | 1   | -----                                                        |
| EPI_ISL_426910 | 1   | -----                                                        |

|                |     |                                                               |
|----------------|-----|---------------------------------------------------------------|
| ORF1ab         | 301 | RSVYPVASPNECNQMCLSTLMKCDHCGETSWQTDGDFVKATCEFCGTENLTKEGATTCGYL |
| EPI_ISL_413575 | 1   | -----                                                         |
| EPI_ISL_413588 | 1   | -----                                                         |
| EPI_ISL_413589 | 1   | -----                                                         |
| EPI_ISL_424221 | 1   | -----                                                         |
| EPI_ISL_424233 | 1   | -----                                                         |
| EPI_ISL_424236 | 1   | -----                                                         |
| EPI_ISL_424238 | 1   | -----                                                         |
| EPI_ISL_424248 | 1   | -----                                                         |
| EPI_ISL_424254 | 1   | -----                                                         |
| EPI_ISL_425548 | 1   | -----                                                         |
| EPI_ISL_425581 | 1   | -----                                                         |
| EPI_ISL_426881 | 1   | -----                                                         |
| EPI_ISL_426883 | 1   | -----                                                         |
| EPI_ISL_426888 | 1   | -----                                                         |
| EPI_ISL_426900 | 1   | -----                                                         |
| EPI_ISL_426901 | 1   | -----                                                         |
| EPI_ISL_426903 | 1   | -----                                                         |
| EPI_ISL_426904 | 1   | -----                                                         |
| EPI_ISL_426907 | 1   | -----                                                         |
| EPI_ISL_426910 | 1   | -----                                                         |
| ORF1ab         | 301 | RSVYPVASPNECNQMCLSTLMKCDHCGETSWQTDGDFVKATCEFCGTENLTKEGATTCGYL |
| EPI_ISL_413575 | 1   | -----                                                         |
| EPI_ISL_413588 | 1   | -----                                                         |
| EPI_ISL_413589 | 1   | -----                                                         |
| EPI_ISL_424221 | 1   | -----                                                         |
| EPI_ISL_424233 | 1   | -----                                                         |
| EPI_ISL_424236 | 1   | -----                                                         |
| EPI_ISL_424238 | 1   | -----                                                         |
| EPI_ISL_424248 | 1   | -----                                                         |
| EPI_ISL_424254 | 1   | -----                                                         |
| EPI_ISL_425548 | 1   | -----                                                         |
| EPI_ISL_425581 | 1   | -----                                                         |
| EPI_ISL_426881 | 1   | -----                                                         |
| EPI_ISL_426883 | 1   | -----                                                         |
| EPI_ISL_426888 | 1   | -----                                                         |
| EPI_ISL_426900 | 1   | -----                                                         |
| EPI_ISL_426901 | 1   | -----                                                         |
| EPI_ISL_426903 | 1   | -----                                                         |
| EPI_ISL_426904 | 1   | -----                                                         |
| EPI_ISL_426907 | 1   | -----                                                         |
| EPI_ISL_426910 | 1   | -----                                                         |

|                |     |                                                                 |
|----------------|-----|-----------------------------------------------------------------|
| ORF1ab         | 361 | PQNAVVKIYCPACHNSEVGPESHSLAEYHNESGLKTILRKGGRRTIAFGGCVFSYVVGCHNKC |
| EPI_ISL_413575 | 1   | -----                                                           |
| EPI_ISL_413588 | 1   | -----                                                           |
| EPI_ISL_413589 | 1   | -----                                                           |
| EPI_ISL_424221 | 1   | -----                                                           |
| EPI_ISL_424233 | 1   | -----                                                           |
| EPI_ISL_424236 | 1   | -----                                                           |
| EPI_ISL_424238 | 1   | -----                                                           |
| EPI_ISL_424248 | 1   | -----                                                           |
| EPI_ISL_424254 | 1   | -----                                                           |
| EPI_ISL_425548 | 1   | -----                                                           |
| EPI_ISL_425581 | 1   | -----                                                           |
| EPI_ISL_426881 | 1   | -----                                                           |
| EPI_ISL_426883 | 1   | -----                                                           |
| EPI_ISL_426888 | 1   | -----                                                           |
| EPI_ISL_426900 | 1   | -----                                                           |
| EPI_ISL_426901 | 1   | -----                                                           |
| EPI_ISL_426903 | 1   | -----                                                           |
| EPI_ISL_426904 | 1   | -----                                                           |
| EPI_ISL_426907 | 1   | -----                                                           |
| EPI_ISL_426910 | 1   | -----                                                           |
| ORF1ab         | 361 | PQNAVVKIYCPACHNSEVGPESHSLAEYHNESGLKTILRKGGRRTIAFGGCVFSYVVGCHNKC |
| EPI_ISL_413575 | 1   | -----                                                           |
| EPI_ISL_413588 | 1   | -----                                                           |
| EPI_ISL_413589 | 1   | -----                                                           |
| EPI_ISL_424221 | 1   | -----                                                           |
| EPI_ISL_424233 | 1   | -----                                                           |
| EPI_ISL_424236 | 1   | -----                                                           |
| EPI_ISL_424238 | 1   | -----                                                           |
| EPI_ISL_424248 | 1   | -----                                                           |
| EPI_ISL_424254 | 1   | -----                                                           |
| EPI_ISL_425548 | 1   | -----                                                           |
| EPI_ISL_425581 | 1   | -----                                                           |
| EPI_ISL_426881 | 1   | -----                                                           |
| EPI_ISL_426883 | 1   | -----                                                           |
| EPI_ISL_426888 | 1   | -----                                                           |
| EPI_ISL_426900 | 1   | -----                                                           |
| EPI_ISL_426901 | 1   | -----                                                           |
| EPI_ISL_426903 | 1   | -----                                                           |
| EPI_ISL_426904 | 1   | -----                                                           |
| EPI_ISL_426907 | 1   | -----                                                           |
| EPI_ISL_426910 | 1   | -----                                                           |

|                |     |                                                             |
|----------------|-----|-------------------------------------------------------------|
| ORF1ab         | 421 | AYWVPRASANIGCNHTGVVGESEGLNDNLLEILQKEKVNINIVGDFKLNEEIAIILASF |
| EPI_ISL_413575 | 1   | -----                                                       |
| EPI_ISL_413588 | 1   | -----                                                       |
| EPI_ISL_413589 | 1   | -----                                                       |
| EPI_ISL_424221 | 1   | -----                                                       |
| EPI_ISL_424233 | 1   | -----                                                       |
| EPI_ISL_424236 | 1   | -----                                                       |
| EPI_ISL_424238 | 1   | -----                                                       |
| EPI_ISL_424248 | 1   | -----                                                       |
| EPI_ISL_424254 | 1   | -----                                                       |
| EPI_ISL_425548 | 1   | -----                                                       |
| EPI_ISL_425581 | 1   | -----                                                       |
| EPI_ISL_426881 | 1   | -----                                                       |
| EPI_ISL_426883 | 1   | -----                                                       |
| EPI_ISL_426888 | 1   | -----                                                       |
| EPI_ISL_426900 | 1   | -----                                                       |
| EPI_ISL_426901 | 1   | -----                                                       |
| EPI_ISL_426903 | 1   | -----                                                       |
| EPI_ISL_426904 | 1   | -----                                                       |
| EPI_ISL_426907 | 1   | -----                                                       |
| EPI_ISL_426910 | 1   | -----                                                       |
| ORF1ab         | 421 | AYWVPRASANIGCNHTGVVGESEGLNDNLLEILQKEKVNINIVGDFKLNEEIAIILASF |
| EPI_ISL_413575 | 1   | -----                                                       |
| EPI_ISL_413588 | 1   | -----                                                       |
| EPI_ISL_413589 | 1   | -----                                                       |
| EPI_ISL_424221 | 1   | -----                                                       |
| EPI_ISL_424233 | 1   | -----                                                       |
| EPI_ISL_424236 | 1   | -----                                                       |
| EPI_ISL_424238 | 1   | -----                                                       |
| EPI_ISL_424248 | 1   | -----                                                       |
| EPI_ISL_424254 | 1   | -----                                                       |
| EPI_ISL_425548 | 1   | -----                                                       |
| EPI_ISL_425581 | 1   | -----                                                       |
| EPI_ISL_426881 | 1   | -----                                                       |
| EPI_ISL_426883 | 1   | -----                                                       |
| EPI_ISL_426888 | 1   | -----                                                       |
| EPI_ISL_426900 | 1   | -----                                                       |
| EPI_ISL_426901 | 1   | -----                                                       |
| EPI_ISL_426903 | 1   | -----                                                       |
| EPI_ISL_426904 | 1   | -----                                                       |
| EPI_ISL_426907 | 1   | -----                                                       |
| EPI_ISL_426910 | 1   | -----                                                       |



|                |     |                                                              |
|----------------|-----|--------------------------------------------------------------|
| ORF1ab         | 481 | SASTSAFVETVKGLDYKAFKQIVESCGNFKVTKGKAKKGAWNIGEQKSILSPLYAFASEA |
| EPI_ISL_413575 | 1   | -----                                                        |
| EPI_ISL_413588 | 1   | -----                                                        |
| EPI_ISL_413589 | 1   | -----                                                        |
| EPI_ISL_424221 | 1   | -----                                                        |
| EPI_ISL_424233 | 1   | -----                                                        |
| EPI_ISL_424236 | 1   | -----                                                        |
| EPI_ISL_424238 | 1   | -----                                                        |
| EPI_ISL_424248 | 1   | -----                                                        |
| EPI_ISL_424254 | 1   | -----                                                        |
| EPI_ISL_425548 | 1   | -----                                                        |
| EPI_ISL_425581 | 1   | -----                                                        |
| EPI_ISL_426881 | 1   | -----                                                        |
| EPI_ISL_426883 | 1   | -----                                                        |
| EPI_ISL_426888 | 1   | -----                                                        |
| EPI_ISL_426900 | 1   | -----                                                        |
| EPI_ISL_426901 | 1   | -----                                                        |
| EPI_ISL_426903 | 1   | -----                                                        |
| EPI_ISL_426904 | 1   | -----                                                        |
| EPI_ISL_426907 | 1   | -----                                                        |
| EPI_ISL_426910 | 1   | -----                                                        |
| ORF1ab         | 481 | SASTSAFVETVKGLDYKAFKQIVESCGNFKVTKGKAKKGAWNIGEQKSILSPLYAFASEA |
| EPI_ISL_413575 | 1   | -----                                                        |
| EPI_ISL_413588 | 1   | -----                                                        |
| EPI_ISL_413589 | 1   | -----                                                        |
| EPI_ISL_424221 | 1   | -----                                                        |
| EPI_ISL_424233 | 1   | -----                                                        |
| EPI_ISL_424236 | 1   | -----                                                        |
| EPI_ISL_424238 | 1   | -----                                                        |
| EPI_ISL_424248 | 1   | -----                                                        |
| EPI_ISL_424254 | 1   | -----                                                        |
| EPI_ISL_425548 | 1   | -----                                                        |
| EPI_ISL_425581 | 1   | -----                                                        |
| EPI_ISL_426881 | 1   | -----                                                        |
| EPI_ISL_426883 | 1   | -----                                                        |
| EPI_ISL_426888 | 1   | -----                                                        |
| EPI_ISL_426900 | 1   | -----                                                        |
| EPI_ISL_426901 | 1   | -----                                                        |
| EPI_ISL_426903 | 1   | -----                                                        |
| EPI_ISL_426904 | 1   | -----                                                        |
| EPI_ISL_426907 | 1   | -----                                                        |
| EPI_ISL_426910 | 1   | -----                                                        |

|                |     |                                                              |
|----------------|-----|--------------------------------------------------------------|
| ORF1ab         | 541 | ARVVRSIFSRTLETAQNSVRVLQKAAITILDGISQYSLRLIDAMMFTSDLATNNLVVMAY |
| EPI_ISL_413575 | 1   | -----                                                        |
| EPI_ISL_413588 | 1   | -----                                                        |
| EPI_ISL_413589 | 1   | -----                                                        |
| EPI_ISL_424221 | 1   | -----                                                        |
| EPI_ISL_424233 | 1   | -----                                                        |
| EPI_ISL_424236 | 1   | -----                                                        |
| EPI_ISL_424238 | 1   | -----                                                        |
| EPI_ISL_424248 | 1   | -----                                                        |
| EPI_ISL_424254 | 1   | -----                                                        |
| EPI_ISL_425548 | 1   | -----                                                        |
| EPI_ISL_425581 | 1   | -----                                                        |
| EPI_ISL_426881 | 1   | -----                                                        |
| EPI_ISL_426883 | 1   | -----                                                        |
| EPI_ISL_426888 | 1   | -----                                                        |
| EPI_ISL_426900 | 1   | -----                                                        |
| EPI_ISL_426901 | 1   | -----                                                        |
| EPI_ISL_426903 | 1   | -----                                                        |
| EPI_ISL_426904 | 1   | -----                                                        |
| EPI_ISL_426907 | 1   | -----                                                        |
| EPI_ISL_426910 | 1   | -----                                                        |
| ORF1ab         | 541 | ARVVRSIFSRTLETAQNSVRVLQKAAITILDGISQYSLRLIDAMMFTSDLATNNLVVMAY |
| EPI_ISL_413575 | 1   | -----                                                        |
| EPI_ISL_413588 | 1   | -----                                                        |
| EPI_ISL_413589 | 1   | -----                                                        |
| EPI_ISL_424221 | 1   | -----                                                        |
| EPI_ISL_424233 | 1   | -----                                                        |
| EPI_ISL_424236 | 1   | -----                                                        |
| EPI_ISL_424238 | 1   | -----                                                        |
| EPI_ISL_424248 | 1   | -----                                                        |
| EPI_ISL_424254 | 1   | -----                                                        |
| EPI_ISL_425548 | 1   | -----                                                        |
| EPI_ISL_425581 | 1   | -----                                                        |
| EPI_ISL_426881 | 1   | -----                                                        |
| EPI_ISL_426883 | 1   | -----                                                        |
| EPI_ISL_426888 | 1   | -----                                                        |
| EPI_ISL_426900 | 1   | -----                                                        |
| EPI_ISL_426901 | 1   | -----                                                        |
| EPI_ISL_426903 | 1   | -----                                                        |
| EPI_ISL_426904 | 1   | -----                                                        |
| EPI_ISL_426907 | 1   | -----                                                        |
| EPI_ISL_426910 | 1   | -----                                                        |

```
ORF1ab 601 ITGGVVQLTSQWLNTNIFGTVYEKLPVLDWLEEKFKEGVEFLRDGWEIVKFISTCACEIV
EPI_ISL_413575 1 -----
EPI_ISL_413588 1 -----
EPI_ISL_413589 1 -----
EPI_ISL_424221 1 -----
EPI_ISL_424233 1 -----
EPI_ISL_424236 1 -----
EPI_ISL_424238 1 -----
EPI_ISL_424248 1 -----
EPI_ISL_424254 1 -----
EPI_ISL_425548 1 -----
EPI_ISL_425581 1 -----
EPI_ISL_426881 1 -----
EPI_ISL_426883 1 -----
EPI_ISL_426888 1 -----
EPI_ISL_426900 1 -----
EPI_ISL_426901 1 -----
EPI_ISL_426903 1 -----
EPI_ISL_426904 1 -----
EPI_ISL_426907 1 -----
EPI_ISL_426910 1 -----
ORF1ab 601 ITGGVVQLTSQWLNTNIFGTVYEKLPVLDWLEEKFKEGVEFLRDGWEIVKFISTCACEIV
EPI_ISL_413575 1 -----
EPI_ISL_413588 1 -----
EPI_ISL_413589 1 -----
EPI_ISL_424221 1 -----
EPI_ISL_424233 1 -----
EPI_ISL_424236 1 -----
EPI_ISL_424238 1 -----
EPI_ISL_424248 1 -----
EPI_ISL_424254 1 -----
EPI_ISL_425548 1 -----
EPI_ISL_425581 1 -----
EPI_ISL_426881 1 -----
EPI_ISL_426883 1 -----
EPI_ISL_426888 1 -----
EPI_ISL_426900 1 -----
EPI_ISL_426901 1 -----
EPI_ISL_426903 1 -----
EPI_ISL_426904 1 -----
EPI_ISL_426907 1 -----
EPI_ISL_426910 1 -----
```

```
ORF1ab 661 GGQIVTCAKEIKESVQTFKLVNKFALCADSIIIGGAKLKALNLGETFVTHSKGLYRKC
EPI_ISL_413575 1 -----
EPI_ISL_413588 1 -----
EPI_ISL_413589 1 -----
EPI_ISL_424221 1 -----
EPI_ISL_424233 1 -----
EPI_ISL_424236 1 -----
EPI_ISL_424238 1 -----
EPI_ISL_424248 1 -----
EPI_ISL_424254 1 -----
EPI_ISL_425548 1 -----
EPI_ISL_425581 1 -----
EPI_ISL_426881 1 -----
EPI_ISL_426883 1 -----
EPI_ISL_426888 1 -----
EPI_ISL_426900 1 -----
EPI_ISL_426901 1 -----
EPI_ISL_426903 1 -----
EPI_ISL_426904 1 -----
EPI_ISL_426907 1 -----
EPI_ISL_426910 1 -----
ORF1ab 661 GGQIVTCAKEIKESVQTFKLVNKFALCADSIIIGGAKLKALNLGETFVTHSKGLYRKC
EPI_ISL_413575 1 -----
EPI_ISL_413588 1 -----
EPI_ISL_413589 1 -----
EPI_ISL_424221 1 -----
EPI_ISL_424233 1 -----
EPI_ISL_424236 1 -----
EPI_ISL_424238 1 -----
EPI_ISL_424248 1 -----
EPI_ISL_424254 1 -----
EPI_ISL_425548 1 -----
EPI_ISL_425581 1 -----
EPI_ISL_426881 1 -----
EPI_ISL_426883 1 -----
EPI_ISL_426888 1 -----
EPI_ISL_426900 1 -----
EPI_ISL_426901 1 -----
EPI_ISL_426903 1 -----
EPI_ISL_426904 1 -----
EPI_ISL_426907 1 -----
EPI_ISL_426910 1 -----
```

|                |     |                                                              |
|----------------|-----|--------------------------------------------------------------|
| ORF1ab         | 721 | VKSREETGLLMPLKAPKEIIFLEGETLPTEVLTEEVVLKTGDLQPLEQPTSEAVEAPLVG |
| EPI_ISL_413575 | 1   | -----                                                        |
| EPI_ISL_413588 | 1   | -----                                                        |
| EPI_ISL_413589 | 1   | -----                                                        |
| EPI_ISL_424221 | 1   | -----                                                        |
| EPI_ISL_424233 | 1   | -----                                                        |
| EPI_ISL_424236 | 1   | -----                                                        |
| EPI_ISL_424238 | 1   | -----                                                        |
| EPI_ISL_424248 | 1   | -----                                                        |
| EPI_ISL_424254 | 1   | -----                                                        |
| EPI_ISL_425548 | 1   | -----                                                        |
| EPI_ISL_425581 | 1   | -----                                                        |
| EPI_ISL_426881 | 1   | -----                                                        |
| EPI_ISL_426883 | 1   | -----                                                        |
| EPI_ISL_426888 | 1   | -----                                                        |
| EPI_ISL_426900 | 1   | -----                                                        |
| EPI_ISL_426901 | 1   | -----                                                        |
| EPI_ISL_426903 | 1   | -----                                                        |
| EPI_ISL_426904 | 1   | -----                                                        |
| EPI_ISL_426907 | 1   | -----                                                        |
| EPI_ISL_426910 | 1   | -----                                                        |
| ORF1ab         | 721 | VKSREETGLLMPLKAPKEIIFLEGETLPTEVLTEEVVLKTGDLQPLEQPTSEAVEAPLVG |
| EPI_ISL_413575 | 1   | -----                                                        |
| EPI_ISL_413588 | 1   | -----                                                        |
| EPI_ISL_413589 | 1   | -----                                                        |
| EPI_ISL_424221 | 1   | -----                                                        |
| EPI_ISL_424233 | 1   | -----                                                        |
| EPI_ISL_424236 | 1   | -----                                                        |
| EPI_ISL_424238 | 1   | -----                                                        |
| EPI_ISL_424248 | 1   | -----                                                        |
| EPI_ISL_424254 | 1   | -----                                                        |
| EPI_ISL_425548 | 1   | -----                                                        |
| EPI_ISL_425581 | 1   | -----                                                        |
| EPI_ISL_426881 | 1   | -----                                                        |
| EPI_ISL_426883 | 1   | -----                                                        |
| EPI_ISL_426888 | 1   | -----                                                        |
| EPI_ISL_426900 | 1   | -----                                                        |
| EPI_ISL_426901 | 1   | -----                                                        |
| EPI_ISL_426903 | 1   | -----                                                        |
| EPI_ISL_426904 | 1   | -----                                                        |
| EPI_ISL_426907 | 1   | -----                                                        |
| EPI_ISL_426910 | 1   | -----                                                        |

|                |     |                                       |                        |
|----------------|-----|---------------------------------------|------------------------|
| ORF1ab         | 781 | TPVCINGLMLLEIKDTEKYCALAPNMMVTNNTFTLKG | APTKVTFGDDTVIEVQGYKSVN |
| EPI_ISL_413575 | 1   | -----                                 | APTKVTFGDDTVIEVQGYKSVN |
| EPI_ISL_413588 | 1   | -----                                 | APTKVTFGDDTVIEVQGYKSVN |
| EPI_ISL_413589 | 1   | -----                                 | APTKVTFGDDTVIEVQGYKSVN |
| EPI_ISL_424221 | 1   | -----                                 | APTKVTFGDDTVIEVQGYKSVN |
| EPI_ISL_424233 | 1   | -----                                 | APTKVTFGDDTVIEVQGYKSVN |
| EPI_ISL_424236 | 1   | -----                                 | APTKVTFGDDTVIEVQGYKSVN |
| EPI_ISL_424238 | 1   | -----                                 | APTKVTFGDDTVIEVQGYKSVN |
| EPI_ISL_424248 | 1   | -----                                 | APTKVTFGDDTVIEVQGYKSVN |
| EPI_ISL_424254 | 1   | -----                                 | APTKVTFGDDTVIEVQGYKSVN |
| EPI_ISL_425548 | 1   | -----                                 | APTKVTFGDDTVIEVQGYKSVN |
| EPI_ISL_425581 | 1   | -----                                 | APTKVTFGDDTVIEVQGYKSVN |
| EPI_ISL_426881 | 1   | -----                                 | APTKVTFGDDTVIEVQGYKSVN |
| EPI_ISL_426883 | 1   | -----                                 | APTKVTFGDDTVIEVQGYKSVN |
| EPI_ISL_426888 | 1   | -----                                 | APTKVTFGDDTVIEVQGYKSVN |
| EPI_ISL_426900 | 1   | -----                                 | APTKVTFGDDTVIEVQGYKSVN |
| EPI_ISL_426901 | 1   | -----                                 | APTKVTFGDDTVIEVQGYKSVN |
| EPI_ISL_426903 | 1   | -----                                 | APTKVTFGDDTVIEVQGYKSVN |
| EPI_ISL_426904 | 1   | -----                                 | APTKVTFGDDTVIEVQGYKSVN |
| EPI_ISL_426907 | 1   | -----                                 | APTKVTFGDDTVIEVQGYKSVN |
| EPI_ISL_426910 | 1   | -----                                 | APTKVTFGDDTVIEVQGYKSVN |
| ORF1ab         | 781 | TPVCINGLMLLEIKDTEKYCALAPNMMVTNNTFTLKG | APTKVTFGDDTVIEVQGYKSVN |
| EPI_ISL_413575 | 1   | -----                                 | APTKVTFGDDTVIEVQGYKSVN |
| EPI_ISL_413588 | 1   | -----                                 | APTKVTFGDDTVIEVQGYKSVN |
| EPI_ISL_413589 | 1   | -----                                 | APTKVTFGDDTVIEVQGYKSVN |
| EPI_ISL_424221 | 1   | -----                                 | APTKVTFGDDTVIEVQGYKSVN |
| EPI_ISL_424233 | 1   | -----                                 | APTKVTFGDDTVIEVQGYKSVN |
| EPI_ISL_424236 | 1   | -----                                 | APTKVTFGDDTVIEVQGYKSVN |
| EPI_ISL_424238 | 1   | -----                                 | APTKVTFGDDTVIEVQGYKSVN |
| EPI_ISL_424248 | 1   | -----                                 | APTKVTFGDDTVIEVQGYKSVN |
| EPI_ISL_424254 | 1   | -----                                 | APTKVTFGDDTVIEVQGYKSVN |
| EPI_ISL_425548 | 1   | -----                                 | APTKVTFGDDTVIEVQGYKSVN |
| EPI_ISL_425581 | 1   | -----                                 | APTKVTFGDDTVIEVQGYKSVN |
| EPI_ISL_426881 | 1   | -----                                 | APTKVTFGDDTVIEVQGYKSVN |
| EPI_ISL_426883 | 1   | -----                                 | APTKVTFGDDTVIEVQGYKSVN |
| EPI_ISL_426888 | 1   | -----                                 | APTKVTFGDDTVIEVQGYKSVN |
| EPI_ISL_426900 | 1   | -----                                 | APTKVTFGDDTVIEVQGYKSVN |
| EPI_ISL_426901 | 1   | -----                                 | APTKVTFGDDTVIEVQGYKSVN |
| EPI_ISL_426903 | 1   | -----                                 | APTKVTFGDDTVIEVQGYKSVN |
| EPI_ISL_426904 | 1   | -----                                 | APTKVTFGDDTVIEVQGYKSVN |
| EPI_ISL_426907 | 1   | -----                                 | APTKVTFGDDTVIEVQGYKSVN |
| EPI_ISL_426910 | 1   | -----                                 | APTKVTFGDDTVIEVQGYKSVN |









































































|                |      |                                                              |
|----------------|------|--------------------------------------------------------------|
| ORFlab         | 2761 | KGGKIVNNWLKQLIKVTLVFLFVAAIFYLITPVHVMSKHTDFSSEIIGYKAIDGGVTRDI |
| EPI_ISL_413575 | 1943 | KGG-----                                                     |
| EPI_ISL_413588 | 1943 | KGG-----                                                     |
| EPI_ISL_413589 | 1943 | KGG-----                                                     |
| EPI_ISL_424221 | 1943 | KGG-----                                                     |
| EPI_ISL_424233 | 1943 | KGG-----                                                     |
| EPI_ISL_424236 | 1943 | KGG-----                                                     |
| EPI_ISL_424238 | 1943 | KGG-----                                                     |
| EPI_ISL_424248 | 1943 | KGG-----                                                     |
| EPI_ISL_424254 | 1943 | KGG-----                                                     |
| EPI_ISL_425548 | 1943 | KGG-----                                                     |
| EPI_ISL_425581 | 1943 | KGG-----                                                     |
| EPI_ISL_426881 | 1943 | KGG-----                                                     |
| EPI_ISL_426883 | 1943 | KGG-----                                                     |
| EPI_ISL_426888 | 1943 | KGG-----                                                     |
| EPI_ISL_426900 | 1943 | KGG-----                                                     |
| EPI_ISL_426901 | 1943 | KGG-----                                                     |
| EPI_ISL_426903 | 1943 | KGG-----                                                     |
| EPI_ISL_426904 | 1943 | KGG-----                                                     |
| EPI_ISL_426907 | 1943 | KGG-----                                                     |
| EPI_ISL_426910 | 1943 | KGG-----                                                     |
| ORFlab         | 2761 | KGGKIVNNWLKQLIKVTLVFLFVAAIFYLITPVHVMSKHTDFSSEIIGYKAIDGGVTRDI |
| EPI_ISL_413575 | 1943 | KGG-----                                                     |
| EPI_ISL_413588 | 1943 | KGG-----                                                     |
| EPI_ISL_413589 | 1943 | KGG-----                                                     |
| EPI_ISL_424221 | 1943 | KGG-----                                                     |
| EPI_ISL_424233 | 1943 | KGG-----                                                     |
| EPI_ISL_424236 | 1943 | KGG-----                                                     |
| EPI_ISL_424238 | 1943 | KGG-----                                                     |
| EPI_ISL_424248 | 1943 | KGG-----                                                     |
| EPI_ISL_424254 | 1943 | KGG-----                                                     |
| EPI_ISL_425548 | 1943 | KGG-----                                                     |
| EPI_ISL_425581 | 1943 | KGG-----                                                     |
| EPI_ISL_426881 | 1943 | KGG-----                                                     |
| EPI_ISL_426883 | 1943 | KGG-----                                                     |
| EPI_ISL_426888 | 1943 | KGG-----                                                     |
| EPI_ISL_426900 | 1943 | KGG-----                                                     |
| EPI_ISL_426901 | 1943 | KGG-----                                                     |
| EPI_ISL_426903 | 1943 | KGG-----                                                     |
| EPI_ISL_426904 | 1943 | KGG-----                                                     |
| EPI_ISL_426907 | 1943 | KGG-----                                                     |
| EPI_ISL_426910 | 1943 | KGG-----                                                     |

ORF1ab 2821 ASTDTCFANKHADFDTWFSQRGGSYTNDKACPLIAAVITREVG FVVPGLPGTILRTTNGD  
EPI\_ISL\_413575 -----  
EPI\_ISL\_413588 -----  
EPI\_ISL\_413589 -----  
EPI\_ISL\_424221 -----  
EPI\_ISL\_424233 -----  
EPI\_ISL\_424236 -----  
EPI\_ISL\_424238 -----  
EPI\_ISL\_424248 -----  
EPI\_ISL\_424254 -----  
EPI\_ISL\_425548 -----  
EPI\_ISL\_425581 -----  
EPI\_ISL\_426881 -----  
EPI\_ISL\_426883 -----  
EPI\_ISL\_426888 -----  
EPI\_ISL\_426900 -----  
EPI\_ISL\_426901 -----  
EPI\_ISL\_426903 -----  
EPI\_ISL\_426904 -----  
EPI\_ISL\_426907 -----  
EPI\_ISL\_426910 -----  
ORF1ab 2821 ASTDTCFANKHADFDTWFSQRGGSYTNDKACPLIAAVITREVG FVVPGLPGTILRTTNGD  
EPI\_ISL\_413575 -----  
EPI\_ISL\_413588 -----  
EPI\_ISL\_413589 -----  
EPI\_ISL\_424221 -----  
EPI\_ISL\_424233 -----  
EPI\_ISL\_424236 -----  
EPI\_ISL\_424238 -----  
EPI\_ISL\_424248 -----  
EPI\_ISL\_424254 -----  
EPI\_ISL\_425548 -----  
EPI\_ISL\_425581 -----  
EPI\_ISL\_426881 -----  
EPI\_ISL\_426883 -----  
EPI\_ISL\_426888 -----  
EPI\_ISL\_426900 -----  
EPI\_ISL\_426901 -----  
EPI\_ISL\_426903 -----  
EPI\_ISL\_426904 -----  
EPI\_ISL\_426907 -----  
EPI\_ISL\_426910 -----



ORF1ab 2881 FLHFLPRVFSAVGNICYTPSKLIEYTD FATSACVLAAECTIFKDASGKVPVPCYDTNVLE  
EPI\_ISL\_413575 -----  
EPI\_ISL\_413588 -----  
EPI\_ISL\_413589 -----  
EPI\_ISL\_424221 -----  
EPI\_ISL\_424233 -----  
EPI\_ISL\_424236 -----  
EPI\_ISL\_424238 -----  
EPI\_ISL\_424248 -----  
EPI\_ISL\_424254 -----  
EPI\_ISL\_425548 -----  
EPI\_ISL\_425581 -----  
EPI\_ISL\_426881 -----  
EPI\_ISL\_426883 -----  
EPI\_ISL\_426888 -----  
EPI\_ISL\_426900 -----  
EPI\_ISL\_426901 -----  
EPI\_ISL\_426903 -----  
EPI\_ISL\_426904 -----  
EPI\_ISL\_426907 -----  
EPI\_ISL\_426910 -----  
ORF1ab 2881 FLHFLPRVFSAVGNICYTPSKLIEYTD FATSACVLAAECTIFKDASGKVPVPCYDTNVLE  
EPI\_ISL\_413575 -----  
EPI\_ISL\_413588 -----  
EPI\_ISL\_413589 -----  
EPI\_ISL\_424221 -----  
EPI\_ISL\_424233 -----  
EPI\_ISL\_424236 -----  
EPI\_ISL\_424238 -----  
EPI\_ISL\_424248 -----  
EPI\_ISL\_424254 -----  
EPI\_ISL\_425548 -----  
EPI\_ISL\_425581 -----  
EPI\_ISL\_426881 -----  
EPI\_ISL\_426883 -----  
EPI\_ISL\_426888 -----  
EPI\_ISL\_426900 -----  
EPI\_ISL\_426901 -----  
EPI\_ISL\_426903 -----  
EPI\_ISL\_426904 -----  
EPI\_ISL\_426907 -----  
EPI\_ISL\_426910 -----

ORF1ab 2941 GSVAYESLRPDTRYVLM DGSIIQFPNTYLEGSRVVTTFDSEYCRHGT CERSEAGVCVST  
EPI\_ISL\_413575 -----  
EPI\_ISL\_413588 -----  
EPI\_ISL\_413589 -----  
EPI\_ISL\_424221 -----  
EPI\_ISL\_424233 -----  
EPI\_ISL\_424236 -----  
EPI\_ISL\_424238 -----  
EPI\_ISL\_424248 -----  
EPI\_ISL\_424254 -----  
EPI\_ISL\_425548 -----  
EPI\_ISL\_425581 -----  
EPI\_ISL\_426881 -----  
EPI\_ISL\_426883 -----  
EPI\_ISL\_426888 -----  
EPI\_ISL\_426900 -----  
EPI\_ISL\_426901 -----  
EPI\_ISL\_426903 -----  
EPI\_ISL\_426904 -----  
EPI\_ISL\_426907 -----  
EPI\_ISL\_426910 -----  
ORF1ab 2941 GSVAYESLRPDTRYVLM DGSIIQFPNTYLEGSRVVTTFDSEYCRHGT CERSEAGVCVST  
EPI\_ISL\_413575 -----  
EPI\_ISL\_413588 -----  
EPI\_ISL\_413589 -----  
EPI\_ISL\_424221 -----  
EPI\_ISL\_424233 -----  
EPI\_ISL\_424236 -----  
EPI\_ISL\_424238 -----  
EPI\_ISL\_424248 -----  
EPI\_ISL\_424254 -----  
EPI\_ISL\_425548 -----  
EPI\_ISL\_425581 -----  
EPI\_ISL\_426881 -----  
EPI\_ISL\_426883 -----  
EPI\_ISL\_426888 -----  
EPI\_ISL\_426900 -----  
EPI\_ISL\_426901 -----  
EPI\_ISL\_426903 -----  
EPI\_ISL\_426904 -----  
EPI\_ISL\_426907 -----  
EPI\_ISL\_426910 -----

```
ORF1ab          3001 SGRWVLNNDYYRSLPGVFCGVDAVNLLTNMFTPLIQPIGALDISASIVAGGIVAIIVVTCL
EPI_ISL_413575 -----
EPI_ISL_413588 -----
EPI_ISL_413589 -----
EPI_ISL_424221 -----
EPI_ISL_424233 -----
EPI_ISL_424236 -----
EPI_ISL_424238 -----
EPI_ISL_424248 -----
EPI_ISL_424254 -----
EPI_ISL_425548 -----
EPI_ISL_425581 -----
EPI_ISL_426881 -----
EPI_ISL_426883 -----
EPI_ISL_426888 -----
EPI_ISL_426900 -----
EPI_ISL_426901 -----
EPI_ISL_426903 -----
EPI_ISL_426904 -----
EPI_ISL_426907 -----
EPI_ISL_426910 -----
ORF1ab          3001 SGRWVLNNDYYRSLPGVFCGVDAVNLLTNMFTPLIQPIGALDISASIVAGGIVAIIVVTCL
EPI_ISL_413575 -----
EPI_ISL_413588 -----
EPI_ISL_413589 -----
EPI_ISL_424221 -----
EPI_ISL_424233 -----
EPI_ISL_424236 -----
EPI_ISL_424238 -----
EPI_ISL_424248 -----
EPI_ISL_424254 -----
EPI_ISL_425548 -----
EPI_ISL_425581 -----
EPI_ISL_426881 -----
EPI_ISL_426883 -----
EPI_ISL_426888 -----
EPI_ISL_426900 -----
EPI_ISL_426901 -----
EPI_ISL_426903 -----
EPI_ISL_426904 -----
EPI_ISL_426907 -----
EPI_ISL_426910 -----
```

ORF1ab 3061 AYYFMRFRRAFGEYSHVVAFNNTLLFLMSFTVLCLTPVYSFLPGVYSVIYLYLTFYLTNDV  
EPI\_ISL\_413575 -----  
EPI\_ISL\_413588 -----  
EPI\_ISL\_413589 -----  
EPI\_ISL\_424221 -----  
EPI\_ISL\_424233 -----  
EPI\_ISL\_424236 -----  
EPI\_ISL\_424238 -----  
EPI\_ISL\_424248 -----  
EPI\_ISL\_424254 -----  
EPI\_ISL\_425548 -----  
EPI\_ISL\_425581 -----  
EPI\_ISL\_426881 -----  
EPI\_ISL\_426883 -----  
EPI\_ISL\_426888 -----  
EPI\_ISL\_426900 -----  
EPI\_ISL\_426901 -----  
EPI\_ISL\_426903 -----  
EPI\_ISL\_426904 -----  
EPI\_ISL\_426907 -----  
EPI\_ISL\_426910 -----  
ORF1ab 3061 AYYFMRFRRAFGEYSHVVAFNNTLLFLMSFTVLCLTPVYSFLPGVYSVIYLYLTFYLTNDV  
EPI\_ISL\_413575 -----  
EPI\_ISL\_413588 -----  
EPI\_ISL\_413589 -----  
EPI\_ISL\_424221 -----  
EPI\_ISL\_424233 -----  
EPI\_ISL\_424236 -----  
EPI\_ISL\_424238 -----  
EPI\_ISL\_424248 -----  
EPI\_ISL\_424254 -----  
EPI\_ISL\_425548 -----  
EPI\_ISL\_425581 -----  
EPI\_ISL\_426881 -----  
EPI\_ISL\_426883 -----  
EPI\_ISL\_426888 -----  
EPI\_ISL\_426900 -----  
EPI\_ISL\_426901 -----  
EPI\_ISL\_426903 -----  
EPI\_ISL\_426904 -----  
EPI\_ISL\_426907 -----  
EPI\_ISL\_426910 -----

ORF1ab 3121 SFLAHIQWMVMFTPLVPFWITIAIYIICISTKHFYWFFSNYLRKRVVFNGVSFSTFEEAAL  
EPI\_ISL\_413575 -----  
EPI\_ISL\_413588 -----  
EPI\_ISL\_413589 -----  
EPI\_ISL\_424221 -----  
EPI\_ISL\_424233 -----  
EPI\_ISL\_424236 -----  
EPI\_ISL\_424238 -----  
EPI\_ISL\_424248 -----  
EPI\_ISL\_424254 -----  
EPI\_ISL\_425548 -----  
EPI\_ISL\_425581 -----  
EPI\_ISL\_426881 -----  
EPI\_ISL\_426883 -----  
EPI\_ISL\_426888 -----  
EPI\_ISL\_426900 -----  
EPI\_ISL\_426901 -----  
EPI\_ISL\_426903 -----  
EPI\_ISL\_426904 -----  
EPI\_ISL\_426907 -----  
EPI\_ISL\_426910 -----  
ORF1ab 3121 SFLAHIQWMVMFTPLVPFWITIAIYIICISTKHFYWFFSNYLRKRVVFNGVSFSTFEEAAL  
EPI\_ISL\_413575 -----  
EPI\_ISL\_413588 -----  
EPI\_ISL\_413589 -----  
EPI\_ISL\_424221 -----  
EPI\_ISL\_424233 -----  
EPI\_ISL\_424236 -----  
EPI\_ISL\_424238 -----  
EPI\_ISL\_424248 -----  
EPI\_ISL\_424254 -----  
EPI\_ISL\_425548 -----  
EPI\_ISL\_425581 -----  
EPI\_ISL\_426881 -----  
EPI\_ISL\_426883 -----  
EPI\_ISL\_426888 -----  
EPI\_ISL\_426900 -----  
EPI\_ISL\_426901 -----  
EPI\_ISL\_426903 -----  
EPI\_ISL\_426904 -----  
EPI\_ISL\_426907 -----  
EPI\_ISL\_426910 -----

```
ORF1ab          3181 CTFLLNKEMYLKLRSDVLLPLTQYNRYLALYNKYKYFSGAMDTTSYREAACCHLAKALND
EPI_ISL_413575 -----
EPI_ISL_413588 -----
EPI_ISL_413589 -----
EPI_ISL_424221 -----
EPI_ISL_424233 -----
EPI_ISL_424236 -----
EPI_ISL_424238 -----
EPI_ISL_424248 -----
EPI_ISL_424254 -----
EPI_ISL_425548 -----
EPI_ISL_425581 -----
EPI_ISL_426881 -----
EPI_ISL_426883 -----
EPI_ISL_426888 -----
EPI_ISL_426900 -----
EPI_ISL_426901 -----
EPI_ISL_426903 -----
EPI_ISL_426904 -----
EPI_ISL_426907 -----
EPI_ISL_426910 -----
ORF1ab          3181 CTFLLNKEMYLKLRSDVLLPLTQYNRYLALYNKYKYFSGAMDTTSYREAACCHLAKALND
EPI_ISL_413575 -----
EPI_ISL_413588 -----
EPI_ISL_413589 -----
EPI_ISL_424221 -----
EPI_ISL_424233 -----
EPI_ISL_424236 -----
EPI_ISL_424238 -----
EPI_ISL_424248 -----
EPI_ISL_424254 -----
EPI_ISL_425548 -----
EPI_ISL_425581 -----
EPI_ISL_426881 -----
EPI_ISL_426883 -----
EPI_ISL_426888 -----
EPI_ISL_426900 -----
EPI_ISL_426901 -----
EPI_ISL_426903 -----
EPI_ISL_426904 -----
EPI_ISL_426907 -----
EPI_ISL_426910 -----
```

ORF1ab 3241 FSNSGSDVLYQPPQTSITSAVLQSGFRKMAFPSGKVEGCMVQVTCGTTTTLNGLWLDDVVY  
EPI\_ISL\_413575 -----  
EPI\_ISL\_413588 -----  
EPI\_ISL\_413589 -----  
EPI\_ISL\_424221 -----  
EPI\_ISL\_424233 -----  
EPI\_ISL\_424236 -----  
EPI\_ISL\_424238 -----  
EPI\_ISL\_424248 -----  
EPI\_ISL\_424254 -----  
EPI\_ISL\_425548 -----  
EPI\_ISL\_425581 -----  
EPI\_ISL\_426881 -----  
EPI\_ISL\_426883 -----  
EPI\_ISL\_426888 -----  
EPI\_ISL\_426900 -----  
EPI\_ISL\_426901 -----  
EPI\_ISL\_426903 -----  
EPI\_ISL\_426904 -----  
EPI\_ISL\_426907 -----  
EPI\_ISL\_426910 -----  
ORF1ab 3241 FSNSGSDVLYQPPQTSITSAVLQSGFRKMAFPSGKVEGCMVQVTCGTTTTLNGLWLDDVVY  
EPI\_ISL\_413575 -----  
EPI\_ISL\_413588 -----  
EPI\_ISL\_413589 -----  
EPI\_ISL\_424221 -----  
EPI\_ISL\_424233 -----  
EPI\_ISL\_424236 -----  
EPI\_ISL\_424238 -----  
EPI\_ISL\_424248 -----  
EPI\_ISL\_424254 -----  
EPI\_ISL\_425548 -----  
EPI\_ISL\_425581 -----  
EPI\_ISL\_426881 -----  
EPI\_ISL\_426883 -----  
EPI\_ISL\_426888 -----  
EPI\_ISL\_426900 -----  
EPI\_ISL\_426901 -----  
EPI\_ISL\_426903 -----  
EPI\_ISL\_426904 -----  
EPI\_ISL\_426907 -----  
EPI\_ISL\_426910 -----

ORF1ab 3301 CPRHVICTSEDMLNPNYEDLLIRKSNHNFLVQAGNVQLRVIGHSMQNCVCLKKVD TANPK  
EPI\_ISL\_413575 -----  
EPI\_ISL\_413588 -----  
EPI\_ISL\_413589 -----  
EPI\_ISL\_424221 -----  
EPI\_ISL\_424233 -----  
EPI\_ISL\_424236 -----  
EPI\_ISL\_424238 -----  
EPI\_ISL\_424248 -----  
EPI\_ISL\_424254 -----  
EPI\_ISL\_425548 -----  
EPI\_ISL\_425581 -----  
EPI\_ISL\_426881 -----  
EPI\_ISL\_426883 -----  
EPI\_ISL\_426888 -----  
EPI\_ISL\_426900 -----  
EPI\_ISL\_426901 -----  
EPI\_ISL\_426903 -----  
EPI\_ISL\_426904 -----  
EPI\_ISL\_426907 -----  
EPI\_ISL\_426910 -----  
ORF1ab 3301 CPRHVICTSEDMLNPNYEDLLIRKSNHNFLVQAGNVQLRVIGHSMQNCVCLKKVD TANPK  
EPI\_ISL\_413575 -----  
EPI\_ISL\_413588 -----  
EPI\_ISL\_413589 -----  
EPI\_ISL\_424221 -----  
EPI\_ISL\_424233 -----  
EPI\_ISL\_424236 -----  
EPI\_ISL\_424238 -----  
EPI\_ISL\_424248 -----  
EPI\_ISL\_424254 -----  
EPI\_ISL\_425548 -----  
EPI\_ISL\_425581 -----  
EPI\_ISL\_426881 -----  
EPI\_ISL\_426883 -----  
EPI\_ISL\_426888 -----  
EPI\_ISL\_426900 -----  
EPI\_ISL\_426901 -----  
EPI\_ISL\_426903 -----  
EPI\_ISL\_426904 -----  
EPI\_ISL\_426907 -----  
EPI\_ISL\_426910 -----



ORF1ab 3361 TPKYK FVRIQPGQTFSVLACYNGSPSGVYQCAMRPNFTIKGSFLNGSCGSVGFNIDYDCV  
EPI\_ISL\_413575 -----  
EPI\_ISL\_413588 -----  
EPI\_ISL\_413589 -----  
EPI\_ISL\_424221 -----  
EPI\_ISL\_424233 -----  
EPI\_ISL\_424236 -----  
EPI\_ISL\_424238 -----  
EPI\_ISL\_424248 -----  
EPI\_ISL\_424254 -----  
EPI\_ISL\_425548 -----  
EPI\_ISL\_425581 -----  
EPI\_ISL\_426881 -----  
EPI\_ISL\_426883 -----  
EPI\_ISL\_426888 -----  
EPI\_ISL\_426900 -----  
EPI\_ISL\_426901 -----  
EPI\_ISL\_426903 -----  
EPI\_ISL\_426904 -----  
EPI\_ISL\_426907 -----  
EPI\_ISL\_426910 -----  
ORF1ab 3361 TPKYK FVRIQPGQTFSVLACYNGSPSGVYQCAMRPNFTIKGSFLNGSCGSVGFNIDYDCV  
EPI\_ISL\_413575 -----  
EPI\_ISL\_413588 -----  
EPI\_ISL\_413589 -----  
EPI\_ISL\_424221 -----  
EPI\_ISL\_424233 -----  
EPI\_ISL\_424236 -----  
EPI\_ISL\_424238 -----  
EPI\_ISL\_424248 -----  
EPI\_ISL\_424254 -----  
EPI\_ISL\_425548 -----  
EPI\_ISL\_425581 -----  
EPI\_ISL\_426881 -----  
EPI\_ISL\_426883 -----  
EPI\_ISL\_426888 -----  
EPI\_ISL\_426900 -----  
EPI\_ISL\_426901 -----  
EPI\_ISL\_426903 -----  
EPI\_ISL\_426904 -----  
EPI\_ISL\_426907 -----  
EPI\_ISL\_426910 -----

ORF1ab 3421 SFCYMHHMELPTGVHAGTDLEGNFYGPFVDRQTAQAAGTDTTITVNVVLAWLYAAVINGDR  
EPI\_ISL\_413575 -----  
EPI\_ISL\_413588 -----  
EPI\_ISL\_413589 -----  
EPI\_ISL\_424221 -----  
EPI\_ISL\_424233 -----  
EPI\_ISL\_424236 -----  
EPI\_ISL\_424238 -----  
EPI\_ISL\_424248 -----  
EPI\_ISL\_424254 -----  
EPI\_ISL\_425548 -----  
EPI\_ISL\_425581 -----  
EPI\_ISL\_426881 -----  
EPI\_ISL\_426883 -----  
EPI\_ISL\_426888 -----  
EPI\_ISL\_426900 -----  
EPI\_ISL\_426901 -----  
EPI\_ISL\_426903 -----  
EPI\_ISL\_426904 -----  
EPI\_ISL\_426907 -----  
EPI\_ISL\_426910 -----  
ORF1ab 3421 SFCYMHHMELPTGVHAGTDLEGNFYGPFVDRQTAQAAGTDTTITVNVVLAWLYAAVINGDR  
EPI\_ISL\_413575 -----  
EPI\_ISL\_413588 -----  
EPI\_ISL\_413589 -----  
EPI\_ISL\_424221 -----  
EPI\_ISL\_424233 -----  
EPI\_ISL\_424236 -----  
EPI\_ISL\_424238 -----  
EPI\_ISL\_424248 -----  
EPI\_ISL\_424254 -----  
EPI\_ISL\_425548 -----  
EPI\_ISL\_425581 -----  
EPI\_ISL\_426881 -----  
EPI\_ISL\_426883 -----  
EPI\_ISL\_426888 -----  
EPI\_ISL\_426900 -----  
EPI\_ISL\_426901 -----  
EPI\_ISL\_426903 -----  
EPI\_ISL\_426904 -----  
EPI\_ISL\_426907 -----  
EPI\_ISL\_426910 -----

```
ORF1ab 3481 WFLNRFTTTTLNDFNLVAMKYNYEPLTQDHVDILGPLSAQTGIAVLDMCASLKELLQNGMN
EPI_ISL_413575 -----
EPI_ISL_413588 -----
EPI_ISL_413589 -----
EPI_ISL_424221 -----
EPI_ISL_424233 -----
EPI_ISL_424236 -----
EPI_ISL_424238 -----
EPI_ISL_424248 -----
EPI_ISL_424254 -----
EPI_ISL_425548 -----
EPI_ISL_425581 -----
EPI_ISL_426881 -----
EPI_ISL_426883 -----
EPI_ISL_426888 -----
EPI_ISL_426900 -----
EPI_ISL_426901 -----
EPI_ISL_426903 -----
EPI_ISL_426904 -----
EPI_ISL_426907 -----
EPI_ISL_426910 -----
ORF1ab 3481 WFLNRFTTTTLNDFNLVAMKYNYEPLTQDHVDILGPLSAQTGIAVLDMCASLKELLQNGMN
EPI_ISL_413575 -----
EPI_ISL_413588 -----
EPI_ISL_413589 -----
EPI_ISL_424221 -----
EPI_ISL_424233 -----
EPI_ISL_424236 -----
EPI_ISL_424238 -----
EPI_ISL_424248 -----
EPI_ISL_424254 -----
EPI_ISL_425548 -----
EPI_ISL_425581 -----
EPI_ISL_426881 -----
EPI_ISL_426883 -----
EPI_ISL_426888 -----
EPI_ISL_426900 -----
EPI_ISL_426901 -----
EPI_ISL_426903 -----
EPI_ISL_426904 -----
EPI_ISL_426907 -----
EPI_ISL_426910 -----
```

ORF1ab 3541 GRTILGSALLEDEFTPFDVVRQCSGVTFQSAVKRTIKGTHHWLLLLTILTSLLVLVQSTQW  
EPI\_ISL\_413575 -----  
EPI\_ISL\_413588 -----  
EPI\_ISL\_413589 -----  
EPI\_ISL\_424221 -----  
EPI\_ISL\_424233 -----  
EPI\_ISL\_424236 -----  
EPI\_ISL\_424238 -----  
EPI\_ISL\_424248 -----  
EPI\_ISL\_424254 -----  
EPI\_ISL\_425548 -----  
EPI\_ISL\_425581 -----  
EPI\_ISL\_426881 -----  
EPI\_ISL\_426883 -----  
EPI\_ISL\_426888 -----  
EPI\_ISL\_426900 -----  
EPI\_ISL\_426901 -----  
EPI\_ISL\_426903 -----  
EPI\_ISL\_426904 -----  
EPI\_ISL\_426907 -----  
EPI\_ISL\_426910 -----  
ORF1ab 3541 GRTILGSALLEDEFTPFDVVRQCSGVTFQSAVKRTIKGTHHWLLLLTILTSLLVLVQSTQW  
EPI\_ISL\_413575 -----  
EPI\_ISL\_413588 -----  
EPI\_ISL\_413589 -----  
EPI\_ISL\_424221 -----  
EPI\_ISL\_424233 -----  
EPI\_ISL\_424236 -----  
EPI\_ISL\_424238 -----  
EPI\_ISL\_424248 -----  
EPI\_ISL\_424254 -----  
EPI\_ISL\_425548 -----  
EPI\_ISL\_425581 -----  
EPI\_ISL\_426881 -----  
EPI\_ISL\_426883 -----  
EPI\_ISL\_426888 -----  
EPI\_ISL\_426900 -----  
EPI\_ISL\_426901 -----  
EPI\_ISL\_426903 -----  
EPI\_ISL\_426904 -----  
EPI\_ISL\_426907 -----  
EPI\_ISL\_426910 -----

ORF1ab 3601 SLFFFLYENAFLPFAMGIIAMSAFAMMFVKHKHAFLLCLFLLPSLATVAYFNMVYMPASWV  
EPI\_ISL\_413575 -----  
EPI\_ISL\_413588 -----  
EPI\_ISL\_413589 -----  
EPI\_ISL\_424221 -----  
EPI\_ISL\_424233 -----  
EPI\_ISL\_424236 -----  
EPI\_ISL\_424238 -----  
EPI\_ISL\_424248 -----  
EPI\_ISL\_424254 -----  
EPI\_ISL\_425548 -----  
EPI\_ISL\_425581 -----  
EPI\_ISL\_426881 -----  
EPI\_ISL\_426883 -----  
EPI\_ISL\_426888 -----  
EPI\_ISL\_426900 -----  
EPI\_ISL\_426901 -----  
EPI\_ISL\_426903 -----  
EPI\_ISL\_426904 -----  
EPI\_ISL\_426907 -----  
EPI\_ISL\_426910 -----  
ORF1ab 3601 SLFFFLYENAFLPFAMGIIAMSAFAMMFVKHKHAFLLCLFLLPSLATVAYFNMVYMPASWV  
EPI\_ISL\_413575 -----  
EPI\_ISL\_413588 -----  
EPI\_ISL\_413589 -----  
EPI\_ISL\_424221 -----  
EPI\_ISL\_424233 -----  
EPI\_ISL\_424236 -----  
EPI\_ISL\_424238 -----  
EPI\_ISL\_424248 -----  
EPI\_ISL\_424254 -----  
EPI\_ISL\_425548 -----  
EPI\_ISL\_425581 -----  
EPI\_ISL\_426881 -----  
EPI\_ISL\_426883 -----  
EPI\_ISL\_426888 -----  
EPI\_ISL\_426900 -----  
EPI\_ISL\_426901 -----  
EPI\_ISL\_426903 -----  
EPI\_ISL\_426904 -----  
EPI\_ISL\_426907 -----  
EPI\_ISL\_426910 -----

ORF1ab 3661 MRIMTWLDMVDTSLSGFKLKDCVMYASAVVLLILMTARTVYDDGARRVWTLMNVLTLVYK  
EPI\_ISL\_413575 -----  
EPI\_ISL\_413588 -----  
EPI\_ISL\_413589 -----  
EPI\_ISL\_424221 -----  
EPI\_ISL\_424233 -----  
EPI\_ISL\_424236 -----  
EPI\_ISL\_424238 -----  
EPI\_ISL\_424248 -----  
EPI\_ISL\_424254 -----  
EPI\_ISL\_425548 -----  
EPI\_ISL\_425581 -----  
EPI\_ISL\_426881 -----  
EPI\_ISL\_426883 -----  
EPI\_ISL\_426888 -----  
EPI\_ISL\_426900 -----  
EPI\_ISL\_426901 -----  
EPI\_ISL\_426903 -----  
EPI\_ISL\_426904 -----  
EPI\_ISL\_426907 -----  
EPI\_ISL\_426910 -----  
ORF1ab 3661 MRIMTWLDMVDTSLSGFKLKDCVMYASAVVLLILMTARTVYDDGARRVWTLMNVLTLVYK  
EPI\_ISL\_413575 -----  
EPI\_ISL\_413588 -----  
EPI\_ISL\_413589 -----  
EPI\_ISL\_424221 -----  
EPI\_ISL\_424233 -----  
EPI\_ISL\_424236 -----  
EPI\_ISL\_424238 -----  
EPI\_ISL\_424248 -----  
EPI\_ISL\_424254 -----  
EPI\_ISL\_425548 -----  
EPI\_ISL\_425581 -----  
EPI\_ISL\_426881 -----  
EPI\_ISL\_426883 -----  
EPI\_ISL\_426888 -----  
EPI\_ISL\_426900 -----  
EPI\_ISL\_426901 -----  
EPI\_ISL\_426903 -----  
EPI\_ISL\_426904 -----  
EPI\_ISL\_426907 -----  
EPI\_ISL\_426910 -----

ORF1ab 3721 VYYGNALDQAISMWALII SVTSNYSGVVTTVMFLARGIVFMCVEYCP IFFITGNTLQCIM  
EPI\_ISL\_413575 -----  
EPI\_ISL\_413588 -----  
EPI\_ISL\_413589 -----  
EPI\_ISL\_424221 -----  
EPI\_ISL\_424233 -----  
EPI\_ISL\_424236 -----  
EPI\_ISL\_424238 -----  
EPI\_ISL\_424248 -----  
EPI\_ISL\_424254 -----  
EPI\_ISL\_425548 -----  
EPI\_ISL\_425581 -----  
EPI\_ISL\_426881 -----  
EPI\_ISL\_426883 -----  
EPI\_ISL\_426888 -----  
EPI\_ISL\_426900 -----  
EPI\_ISL\_426901 -----  
EPI\_ISL\_426903 -----  
EPI\_ISL\_426904 -----  
EPI\_ISL\_426907 -----  
EPI\_ISL\_426910 -----  
ORF1ab 3721 VYYGNALDQAISMWALII SVTSNYSGVVTTVMFLARGIVFMCVEYCP IFFITGNTLQCIM  
EPI\_ISL\_413575 -----  
EPI\_ISL\_413588 -----  
EPI\_ISL\_413589 -----  
EPI\_ISL\_424221 -----  
EPI\_ISL\_424233 -----  
EPI\_ISL\_424236 -----  
EPI\_ISL\_424238 -----  
EPI\_ISL\_424248 -----  
EPI\_ISL\_424254 -----  
EPI\_ISL\_425548 -----  
EPI\_ISL\_425581 -----  
EPI\_ISL\_426881 -----  
EPI\_ISL\_426883 -----  
EPI\_ISL\_426888 -----  
EPI\_ISL\_426900 -----  
EPI\_ISL\_426901 -----  
EPI\_ISL\_426903 -----  
EPI\_ISL\_426904 -----  
EPI\_ISL\_426907 -----  
EPI\_ISL\_426910 -----

ORF1ab 3781 LVYCFLGYFCTCYFGLFCLLNRYFRLTLGVYDYL VSTQEF RYMNSQGLLPPKNSIDAFKL  
EPI\_ISL\_413575 -----  
EPI\_ISL\_413588 -----  
EPI\_ISL\_413589 -----  
EPI\_ISL\_424221 -----  
EPI\_ISL\_424233 -----  
EPI\_ISL\_424236 -----  
EPI\_ISL\_424238 -----  
EPI\_ISL\_424248 -----  
EPI\_ISL\_424254 -----  
EPI\_ISL\_425548 -----  
EPI\_ISL\_425581 -----  
EPI\_ISL\_426881 -----  
EPI\_ISL\_426883 -----  
EPI\_ISL\_426888 -----  
EPI\_ISL\_426900 -----  
EPI\_ISL\_426901 -----  
EPI\_ISL\_426903 -----  
EPI\_ISL\_426904 -----  
EPI\_ISL\_426907 -----  
EPI\_ISL\_426910 -----  
ORF1ab 3781 LVYCFLGYFCTCYFGLFCLLNRYFRLTLGVYDYL VSTQEF RYMNSQGLLPPKNSIDAFKL  
EPI\_ISL\_413575 -----  
EPI\_ISL\_413588 -----  
EPI\_ISL\_413589 -----  
EPI\_ISL\_424221 -----  
EPI\_ISL\_424233 -----  
EPI\_ISL\_424236 -----  
EPI\_ISL\_424238 -----  
EPI\_ISL\_424248 -----  
EPI\_ISL\_424254 -----  
EPI\_ISL\_425548 -----  
EPI\_ISL\_425581 -----  
EPI\_ISL\_426881 -----  
EPI\_ISL\_426883 -----  
EPI\_ISL\_426888 -----  
EPI\_ISL\_426900 -----  
EPI\_ISL\_426901 -----  
EPI\_ISL\_426903 -----  
EPI\_ISL\_426904 -----  
EPI\_ISL\_426907 -----  
EPI\_ISL\_426910 -----



ORF1ab 3841 NIKLLGVGGKPCIKVATVQSKMSDVKCTSVVLLSVLQQLRVESSSKLWAQCVQLHNDILL  
EPI\_ISL\_413575 -----  
EPI\_ISL\_413588 -----  
EPI\_ISL\_413589 -----  
EPI\_ISL\_424221 -----  
EPI\_ISL\_424233 -----  
EPI\_ISL\_424236 -----  
EPI\_ISL\_424238 -----  
EPI\_ISL\_424248 -----  
EPI\_ISL\_424254 -----  
EPI\_ISL\_425548 -----  
EPI\_ISL\_425581 -----  
EPI\_ISL\_426881 -----  
EPI\_ISL\_426883 -----  
EPI\_ISL\_426888 -----  
EPI\_ISL\_426900 -----  
EPI\_ISL\_426901 -----  
EPI\_ISL\_426903 -----  
EPI\_ISL\_426904 -----  
EPI\_ISL\_426907 -----  
EPI\_ISL\_426910 -----  
ORF1ab 3841 NIKLLGVGGKPCIKVATVQSKMSDVKCTSVVLLSVLQQLRVESSSKLWAQCVQLHNDILL  
EPI\_ISL\_413575 -----  
EPI\_ISL\_413588 -----  
EPI\_ISL\_413589 -----  
EPI\_ISL\_424221 -----  
EPI\_ISL\_424233 -----  
EPI\_ISL\_424236 -----  
EPI\_ISL\_424238 -----  
EPI\_ISL\_424248 -----  
EPI\_ISL\_424254 -----  
EPI\_ISL\_425548 -----  
EPI\_ISL\_425581 -----  
EPI\_ISL\_426881 -----  
EPI\_ISL\_426883 -----  
EPI\_ISL\_426888 -----  
EPI\_ISL\_426900 -----  
EPI\_ISL\_426901 -----  
EPI\_ISL\_426903 -----  
EPI\_ISL\_426904 -----  
EPI\_ISL\_426907 -----  
EPI\_ISL\_426910 -----

ORF1ab 3901 AKDTTEAFEKMSVLLSVLLSMQGAVDINKLCEEMLDNRATLQAIASEFSSLPSYAAFATA  
EPI\_ISL\_413575 -----  
EPI\_ISL\_413588 -----  
EPI\_ISL\_413589 -----  
EPI\_ISL\_424221 -----  
EPI\_ISL\_424233 -----  
EPI\_ISL\_424236 -----  
EPI\_ISL\_424238 -----  
EPI\_ISL\_424248 -----  
EPI\_ISL\_424254 -----  
EPI\_ISL\_425548 -----  
EPI\_ISL\_425581 -----  
EPI\_ISL\_426881 -----  
EPI\_ISL\_426883 -----  
EPI\_ISL\_426888 -----  
EPI\_ISL\_426900 -----  
EPI\_ISL\_426901 -----  
EPI\_ISL\_426903 -----  
EPI\_ISL\_426904 -----  
EPI\_ISL\_426907 -----  
EPI\_ISL\_426910 -----  
ORF1ab 3901 AKDTTEAFEKMSVLLSVLLSMQGAVDINKLCEEMLDNRATLQAIASEFSSLPSYAAFATA  
EPI\_ISL\_413575 -----  
EPI\_ISL\_413588 -----  
EPI\_ISL\_413589 -----  
EPI\_ISL\_424221 -----  
EPI\_ISL\_424233 -----  
EPI\_ISL\_424236 -----  
EPI\_ISL\_424238 -----  
EPI\_ISL\_424248 -----  
EPI\_ISL\_424254 -----  
EPI\_ISL\_425548 -----  
EPI\_ISL\_425581 -----  
EPI\_ISL\_426881 -----  
EPI\_ISL\_426883 -----  
EPI\_ISL\_426888 -----  
EPI\_ISL\_426900 -----  
EPI\_ISL\_426901 -----  
EPI\_ISL\_426903 -----  
EPI\_ISL\_426904 -----  
EPI\_ISL\_426907 -----  
EPI\_ISL\_426910 -----

ORF1ab 3961 QEAYEQAVANGDSEVVLKLLKSLNVAKSEFDRDAAMQRKLEKMDQAMTQMYKQARSED  
EPI\_ISL\_413575 -----  
EPI\_ISL\_413588 -----  
EPI\_ISL\_413589 -----  
EPI\_ISL\_424221 -----  
EPI\_ISL\_424233 -----  
EPI\_ISL\_424236 -----  
EPI\_ISL\_424238 -----  
EPI\_ISL\_424248 -----  
EPI\_ISL\_424254 -----  
EPI\_ISL\_425548 -----  
EPI\_ISL\_425581 -----  
EPI\_ISL\_426881 -----  
EPI\_ISL\_426883 -----  
EPI\_ISL\_426888 -----  
EPI\_ISL\_426900 -----  
EPI\_ISL\_426901 -----  
EPI\_ISL\_426903 -----  
EPI\_ISL\_426904 -----  
EPI\_ISL\_426907 -----  
EPI\_ISL\_426910 -----  
ORF1ab 3961 QEAYEQAVANGDSEVVLKLLKSLNVAKSEFDRDAAMQRKLEKMDQAMTQMYKQARSED  
EPI\_ISL\_413575 -----  
EPI\_ISL\_413588 -----  
EPI\_ISL\_413589 -----  
EPI\_ISL\_424221 -----  
EPI\_ISL\_424233 -----  
EPI\_ISL\_424236 -----  
EPI\_ISL\_424238 -----  
EPI\_ISL\_424248 -----  
EPI\_ISL\_424254 -----  
EPI\_ISL\_425548 -----  
EPI\_ISL\_425581 -----  
EPI\_ISL\_426881 -----  
EPI\_ISL\_426883 -----  
EPI\_ISL\_426888 -----  
EPI\_ISL\_426900 -----  
EPI\_ISL\_426901 -----  
EPI\_ISL\_426903 -----  
EPI\_ISL\_426904 -----  
EPI\_ISL\_426907 -----  
EPI\_ISL\_426910 -----

```
ORF1ab          4021 KRAKVTSAMQTMLFTMLRKLNDNDALNNIINNARDGCVPLNIIPLTTAAKLMVVI PDYNTY
EPI_ISL_413575 -----
EPI_ISL_413588 -----
EPI_ISL_413589 -----
EPI_ISL_424221 -----
EPI_ISL_424233 -----
EPI_ISL_424236 -----
EPI_ISL_424238 -----
EPI_ISL_424248 -----
EPI_ISL_424254 -----
EPI_ISL_425548 -----
EPI_ISL_425581 -----
EPI_ISL_426881 -----
EPI_ISL_426883 -----
EPI_ISL_426888 -----
EPI_ISL_426900 -----
EPI_ISL_426901 -----
EPI_ISL_426903 -----
EPI_ISL_426904 -----
EPI_ISL_426907 -----
EPI_ISL_426910 -----
ORF1ab          4021 KRAKVTSAMQTMLFTMLRKLNDNDALNNIINNARDGCVPLNIIPLTTAAKLMVVI PDYNTY
EPI_ISL_413575 -----
EPI_ISL_413588 -----
EPI_ISL_413589 -----
EPI_ISL_424221 -----
EPI_ISL_424233 -----
EPI_ISL_424236 -----
EPI_ISL_424238 -----
EPI_ISL_424248 -----
EPI_ISL_424254 -----
EPI_ISL_425548 -----
EPI_ISL_425581 -----
EPI_ISL_426881 -----
EPI_ISL_426883 -----
EPI_ISL_426888 -----
EPI_ISL_426900 -----
EPI_ISL_426901 -----
EPI_ISL_426903 -----
EPI_ISL_426904 -----
EPI_ISL_426907 -----
EPI_ISL_426910 -----
```

ORF1ab 4081 KNTCDGTTFTYASALWEIQQVVDADSKIVQLSEISMDNSPNLAWPLIVTALRANSVAVKLQ  
EPI\_ISL\_413575 -----  
EPI\_ISL\_413588 -----  
EPI\_ISL\_413589 -----  
EPI\_ISL\_424221 -----  
EPI\_ISL\_424233 -----  
EPI\_ISL\_424236 -----  
EPI\_ISL\_424238 -----  
EPI\_ISL\_424248 -----  
EPI\_ISL\_424254 -----  
EPI\_ISL\_425548 -----  
EPI\_ISL\_425581 -----  
EPI\_ISL\_426881 -----  
EPI\_ISL\_426883 -----  
EPI\_ISL\_426888 -----  
EPI\_ISL\_426900 -----  
EPI\_ISL\_426901 -----  
EPI\_ISL\_426903 -----  
EPI\_ISL\_426904 -----  
EPI\_ISL\_426907 -----  
EPI\_ISL\_426910 -----  
ORF1ab 4081 KNTCDGTTFTYASALWEIQQVVDADSKIVQLSEISMDNSPNLAWPLIVTALRANSVAVKLQ  
EPI\_ISL\_413575 -----  
EPI\_ISL\_413588 -----  
EPI\_ISL\_413589 -----  
EPI\_ISL\_424221 -----  
EPI\_ISL\_424233 -----  
EPI\_ISL\_424236 -----  
EPI\_ISL\_424238 -----  
EPI\_ISL\_424248 -----  
EPI\_ISL\_424254 -----  
EPI\_ISL\_425548 -----  
EPI\_ISL\_425581 -----  
EPI\_ISL\_426881 -----  
EPI\_ISL\_426883 -----  
EPI\_ISL\_426888 -----  
EPI\_ISL\_426900 -----  
EPI\_ISL\_426901 -----  
EPI\_ISL\_426903 -----  
EPI\_ISL\_426904 -----  
EPI\_ISL\_426907 -----  
EPI\_ISL\_426910 -----

ORF1ab 4141 NNELSPVALRQMSCAAGTTQTACTDDNALAYYNTTKGGRFVLALLSDLQDLKWARFPKSD  
EPI\_ISL\_413575 -----  
EPI\_ISL\_413588 -----  
EPI\_ISL\_413589 -----  
EPI\_ISL\_424221 -----  
EPI\_ISL\_424233 -----  
EPI\_ISL\_424236 -----  
EPI\_ISL\_424238 -----  
EPI\_ISL\_424248 -----  
EPI\_ISL\_424254 -----  
EPI\_ISL\_425548 -----  
EPI\_ISL\_425581 -----  
EPI\_ISL\_426881 -----  
EPI\_ISL\_426883 -----  
EPI\_ISL\_426888 -----  
EPI\_ISL\_426900 -----  
EPI\_ISL\_426901 -----  
EPI\_ISL\_426903 -----  
EPI\_ISL\_426904 -----  
EPI\_ISL\_426907 -----  
EPI\_ISL\_426910 -----  
ORF1ab 4141 NNELSPVALRQMSCAAGTTQTACTDDNALAYYNTTKGGRFVLALLSDLQDLKWARFPKSD  
EPI\_ISL\_413575 -----  
EPI\_ISL\_413588 -----  
EPI\_ISL\_413589 -----  
EPI\_ISL\_424221 -----  
EPI\_ISL\_424233 -----  
EPI\_ISL\_424236 -----  
EPI\_ISL\_424238 -----  
EPI\_ISL\_424248 -----  
EPI\_ISL\_424254 -----  
EPI\_ISL\_425548 -----  
EPI\_ISL\_425581 -----  
EPI\_ISL\_426881 -----  
EPI\_ISL\_426883 -----  
EPI\_ISL\_426888 -----  
EPI\_ISL\_426900 -----  
EPI\_ISL\_426901 -----  
EPI\_ISL\_426903 -----  
EPI\_ISL\_426904 -----  
EPI\_ISL\_426907 -----  
EPI\_ISL\_426910 -----

```
ORF1ab      4201 GTGTIYTELEPPCRFVTDTPKGPKVKYLYFIKGLNNLNRMVGLGSLAATVRLQAGNATEV
EPI_ISL_413575 -----
EPI_ISL_413588 -----
EPI_ISL_413589 -----
EPI_ISL_424221 -----
EPI_ISL_424233 -----
EPI_ISL_424236 -----
EPI_ISL_424238 -----
EPI_ISL_424248 -----
EPI_ISL_424254 -----
EPI_ISL_425548 -----
EPI_ISL_425581 -----
EPI_ISL_426881 -----
EPI_ISL_426883 -----
EPI_ISL_426888 -----
EPI_ISL_426900 -----
EPI_ISL_426901 -----
EPI_ISL_426903 -----
EPI_ISL_426904 -----
EPI_ISL_426907 -----
EPI_ISL_426910 -----
ORF1ab      4201 GTGTIYTELEPPCRFVTDTPKGPKVKYLYFIKGLNNLNRMVGLGSLAATVRLQAGNATEV
EPI_ISL_413575 -----
EPI_ISL_413588 -----
EPI_ISL_413589 -----
EPI_ISL_424221 -----
EPI_ISL_424233 -----
EPI_ISL_424236 -----
EPI_ISL_424238 -----
EPI_ISL_424248 -----
EPI_ISL_424254 -----
EPI_ISL_425548 -----
EPI_ISL_425581 -----
EPI_ISL_426881 -----
EPI_ISL_426883 -----
EPI_ISL_426888 -----
EPI_ISL_426900 -----
EPI_ISL_426901 -----
EPI_ISL_426903 -----
EPI_ISL_426904 -----
EPI_ISL_426907 -----
EPI_ISL_426910 -----
```

ORF1ab 4261 PANSTVLSFCAFAVDAAKAYKDYLASGGQPITNCVKMLCTHTGTGQAITVTPEANMDQES  
EPI\_ISL\_413575 -----  
EPI\_ISL\_413588 -----  
EPI\_ISL\_413589 -----  
EPI\_ISL\_424221 -----  
EPI\_ISL\_424233 -----  
EPI\_ISL\_424236 -----  
EPI\_ISL\_424238 -----  
EPI\_ISL\_424248 -----  
EPI\_ISL\_424254 -----  
EPI\_ISL\_425548 -----  
EPI\_ISL\_425581 -----  
EPI\_ISL\_426881 -----  
EPI\_ISL\_426883 -----  
EPI\_ISL\_426888 -----  
EPI\_ISL\_426900 -----  
EPI\_ISL\_426901 -----  
EPI\_ISL\_426903 -----  
EPI\_ISL\_426904 -----  
EPI\_ISL\_426907 -----  
EPI\_ISL\_426910 -----  
ORF1ab 4261 PANSTVLSFCAFAVDAAKAYKDYLASGGQPITNCVKMLCTHTGTGQAITVTPEANMDQES  
EPI\_ISL\_413575 -----  
EPI\_ISL\_413588 -----  
EPI\_ISL\_413589 -----  
EPI\_ISL\_424221 -----  
EPI\_ISL\_424233 -----  
EPI\_ISL\_424236 -----  
EPI\_ISL\_424238 -----  
EPI\_ISL\_424248 -----  
EPI\_ISL\_424254 -----  
EPI\_ISL\_425548 -----  
EPI\_ISL\_425581 -----  
EPI\_ISL\_426881 -----  
EPI\_ISL\_426883 -----  
EPI\_ISL\_426888 -----  
EPI\_ISL\_426900 -----  
EPI\_ISL\_426901 -----  
EPI\_ISL\_426903 -----  
EPI\_ISL\_426904 -----  
EPI\_ISL\_426907 -----  
EPI\_ISL\_426910 -----



```
ORF1ab          4321 FGGASCCLYCRCHIDHPNPKGFCDLKGKYVQIPTTCANDPVGFTLKN TVCTVCGMWKGYG
EPI_ISL_413575 -----
EPI_ISL_413588 -----
EPI_ISL_413589 -----
EPI_ISL_424221 -----
EPI_ISL_424233 -----
EPI_ISL_424236 -----
EPI_ISL_424238 -----
EPI_ISL_424248 -----
EPI_ISL_424254 -----
EPI_ISL_425548 -----
EPI_ISL_425581 -----
EPI_ISL_426881 -----
EPI_ISL_426883 -----
EPI_ISL_426888 -----
EPI_ISL_426900 -----
EPI_ISL_426901 -----
EPI_ISL_426903 -----
EPI_ISL_426904 -----
EPI_ISL_426907 -----
EPI_ISL_426910 -----
ORF1ab          4321 FGGASCCLYCRCHIDHPNPKGFCDLKGKYVQIPTTCANDPVGFTLKN TVCTVCGMWKGYG
EPI_ISL_413575 -----
EPI_ISL_413588 -----
EPI_ISL_413589 -----
EPI_ISL_424221 -----
EPI_ISL_424233 -----
EPI_ISL_424236 -----
EPI_ISL_424238 -----
EPI_ISL_424248 -----
EPI_ISL_424254 -----
EPI_ISL_425548 -----
EPI_ISL_425581 -----
EPI_ISL_426881 -----
EPI_ISL_426883 -----
EPI_ISL_426888 -----
EPI_ISL_426900 -----
EPI_ISL_426901 -----
EPI_ISL_426903 -----
EPI_ISL_426904 -----
EPI_ISL_426907 -----
EPI_ISL_426910 -----
```

ORF1ab 4381 CSCDQLREPMLQSADAQSFLNRVCGVSAARLTPCGTGTSTDVVYRAFDIYNDKVAGFAKF  
EPI\_ISL\_413575 -----  
EPI\_ISL\_413588 -----  
EPI\_ISL\_413589 -----  
EPI\_ISL\_424221 -----  
EPI\_ISL\_424233 -----  
EPI\_ISL\_424236 -----  
EPI\_ISL\_424238 -----  
EPI\_ISL\_424248 -----  
EPI\_ISL\_424254 -----  
EPI\_ISL\_425548 -----  
EPI\_ISL\_425581 -----  
EPI\_ISL\_426881 -----  
EPI\_ISL\_426883 -----  
EPI\_ISL\_426888 -----  
EPI\_ISL\_426900 -----  
EPI\_ISL\_426901 -----  
EPI\_ISL\_426903 -----  
EPI\_ISL\_426904 -----  
EPI\_ISL\_426907 -----  
EPI\_ISL\_426910 -----  
ORF1ab 4381 CSCDQLREPMLQSADAQSFLNRVCGVSAARLTPCGTGTSTDVVYRAFDIYNDKVAGFAKF  
EPI\_ISL\_413575 -----  
EPI\_ISL\_413588 -----  
EPI\_ISL\_413589 -----  
EPI\_ISL\_424221 -----  
EPI\_ISL\_424233 -----  
EPI\_ISL\_424236 -----  
EPI\_ISL\_424238 -----  
EPI\_ISL\_424248 -----  
EPI\_ISL\_424254 -----  
EPI\_ISL\_425548 -----  
EPI\_ISL\_425581 -----  
EPI\_ISL\_426881 -----  
EPI\_ISL\_426883 -----  
EPI\_ISL\_426888 -----  
EPI\_ISL\_426900 -----  
EPI\_ISL\_426901 -----  
EPI\_ISL\_426903 -----  
EPI\_ISL\_426904 -----  
EPI\_ISL\_426907 -----  
EPI\_ISL\_426910 -----

ORF1ab 4441 LKTNCCRFQEKDEDDNLI DSYFVVKRHTFSNYQHEETIYNLLKDCPAVAKHDFFKFRIDG  
EPI\_ISL\_413575 -----  
EPI\_ISL\_413588 -----  
EPI\_ISL\_413589 -----  
EPI\_ISL\_424221 -----  
EPI\_ISL\_424233 -----  
EPI\_ISL\_424236 -----  
EPI\_ISL\_424238 -----  
EPI\_ISL\_424248 -----  
EPI\_ISL\_424254 -----  
EPI\_ISL\_425548 -----  
EPI\_ISL\_425581 -----  
EPI\_ISL\_426881 -----  
EPI\_ISL\_426883 -----  
EPI\_ISL\_426888 -----  
EPI\_ISL\_426900 -----  
EPI\_ISL\_426901 -----  
EPI\_ISL\_426903 -----  
EPI\_ISL\_426904 -----  
EPI\_ISL\_426907 -----  
EPI\_ISL\_426910 -----  
ORF1ab 4441 LKTNCCRFQEKDEDDNLI DSYFVVKRHTFSNYQHEETIYNLLKDCPAVAKHDFFKFRIDG  
EPI\_ISL\_413575 -----  
EPI\_ISL\_413588 -----  
EPI\_ISL\_413589 -----  
EPI\_ISL\_424221 -----  
EPI\_ISL\_424233 -----  
EPI\_ISL\_424236 -----  
EPI\_ISL\_424238 -----  
EPI\_ISL\_424248 -----  
EPI\_ISL\_424254 -----  
EPI\_ISL\_425548 -----  
EPI\_ISL\_425581 -----  
EPI\_ISL\_426881 -----  
EPI\_ISL\_426883 -----  
EPI\_ISL\_426888 -----  
EPI\_ISL\_426900 -----  
EPI\_ISL\_426901 -----  
EPI\_ISL\_426903 -----  
EPI\_ISL\_426904 -----  
EPI\_ISL\_426907 -----  
EPI\_ISL\_426910 -----

ORF1ab 4501 DMVPHISRQRLTKYTMADLVYALRHFDEGNCDTLKEILVTYNCCDDDYFNKKDWYDFVEN  
EPI\_ISL\_413575 -----  
EPI\_ISL\_413588 -----  
EPI\_ISL\_413589 -----  
EPI\_ISL\_424221 -----  
EPI\_ISL\_424233 -----  
EPI\_ISL\_424236 -----  
EPI\_ISL\_424238 -----  
EPI\_ISL\_424248 -----  
EPI\_ISL\_424254 -----  
EPI\_ISL\_425548 -----  
EPI\_ISL\_425581 -----  
EPI\_ISL\_426881 -----  
EPI\_ISL\_426883 -----  
EPI\_ISL\_426888 -----  
EPI\_ISL\_426900 -----  
EPI\_ISL\_426901 -----  
EPI\_ISL\_426903 -----  
EPI\_ISL\_426904 -----  
EPI\_ISL\_426907 -----  
EPI\_ISL\_426910 -----  
ORF1ab 4501 DMVPHISRQRLTKYTMADLVYALRHFDEGNCDTLKEILVTYNCCDDDYFNKKDWYDFVEN  
EPI\_ISL\_413575 -----  
EPI\_ISL\_413588 -----  
EPI\_ISL\_413589 -----  
EPI\_ISL\_424221 -----  
EPI\_ISL\_424233 -----  
EPI\_ISL\_424236 -----  
EPI\_ISL\_424238 -----  
EPI\_ISL\_424248 -----  
EPI\_ISL\_424254 -----  
EPI\_ISL\_425548 -----  
EPI\_ISL\_425581 -----  
EPI\_ISL\_426881 -----  
EPI\_ISL\_426883 -----  
EPI\_ISL\_426888 -----  
EPI\_ISL\_426900 -----  
EPI\_ISL\_426901 -----  
EPI\_ISL\_426903 -----  
EPI\_ISL\_426904 -----  
EPI\_ISL\_426907 -----  
EPI\_ISL\_426910 -----

ORF1ab 4561 PDILRVYANLGERVRQALLKTVQFCDAMRNAGIVGVLTLDNQDLNGNWWYDFGDFIQTTTPG  
EPI\_ISL\_413575 -----  
EPI\_ISL\_413588 -----  
EPI\_ISL\_413589 -----  
EPI\_ISL\_424221 -----  
EPI\_ISL\_424233 -----  
EPI\_ISL\_424236 -----  
EPI\_ISL\_424238 -----  
EPI\_ISL\_424248 -----  
EPI\_ISL\_424254 -----  
EPI\_ISL\_425548 -----  
EPI\_ISL\_425581 -----  
EPI\_ISL\_426881 -----  
EPI\_ISL\_426883 -----  
EPI\_ISL\_426888 -----  
EPI\_ISL\_426900 -----  
EPI\_ISL\_426901 -----  
EPI\_ISL\_426903 -----  
EPI\_ISL\_426904 -----  
EPI\_ISL\_426907 -----  
EPI\_ISL\_426910 -----  
ORF1ab 4561 PDILRVYANLGERVRQALLKTVQFCDAMRNAGIVGVLTLDNQDLNGNWWYDFGDFIQTTTPG  
EPI\_ISL\_413575 -----  
EPI\_ISL\_413588 -----  
EPI\_ISL\_413589 -----  
EPI\_ISL\_424221 -----  
EPI\_ISL\_424233 -----  
EPI\_ISL\_424236 -----  
EPI\_ISL\_424238 -----  
EPI\_ISL\_424248 -----  
EPI\_ISL\_424254 -----  
EPI\_ISL\_425548 -----  
EPI\_ISL\_425581 -----  
EPI\_ISL\_426881 -----  
EPI\_ISL\_426883 -----  
EPI\_ISL\_426888 -----  
EPI\_ISL\_426900 -----  
EPI\_ISL\_426901 -----  
EPI\_ISL\_426903 -----  
EPI\_ISL\_426904 -----  
EPI\_ISL\_426907 -----  
EPI\_ISL\_426910 -----

```
ORF1ab          4621  SGVPVVDSSYSSLMPILTLTRALTAESHVDTDLTKPYIKWDLLKYDFTEERLKLFDYFK
EPI_ISL_413575  -----
EPI_ISL_413588  -----
EPI_ISL_413589  -----
EPI_ISL_424221  -----
EPI_ISL_424233  -----
EPI_ISL_424236  -----
EPI_ISL_424238  -----
EPI_ISL_424248  -----
EPI_ISL_424254  -----
EPI_ISL_425548  -----
EPI_ISL_425581  -----
EPI_ISL_426881  -----
EPI_ISL_426883  -----
EPI_ISL_426888  -----
EPI_ISL_426900  -----
EPI_ISL_426901  -----
EPI_ISL_426903  -----
EPI_ISL_426904  -----
EPI_ISL_426907  -----
EPI_ISL_426910  -----
ORF1ab          4621  SGVPVVDSSYSSLMPILTLTRALTAESHVDTDLTKPYIKWDLLKYDFTEERLKLFDYFK
EPI_ISL_413575  -----
EPI_ISL_413588  -----
EPI_ISL_413589  -----
EPI_ISL_424221  -----
EPI_ISL_424233  -----
EPI_ISL_424236  -----
EPI_ISL_424238  -----
EPI_ISL_424248  -----
EPI_ISL_424254  -----
EPI_ISL_425548  -----
EPI_ISL_425581  -----
EPI_ISL_426881  -----
EPI_ISL_426883  -----
EPI_ISL_426888  -----
EPI_ISL_426900  -----
EPI_ISL_426901  -----
EPI_ISL_426903  -----
EPI_ISL_426904  -----
EPI_ISL_426907  -----
EPI_ISL_426910  -----
```

```
ORF1ab          4681 YWDQTYHPNCVNCLDDRCILHCANFNVLVSTVFPPTSFGPLVRKIFVDGVPFVVSTGYHF
EPI_ISL_413575 -----
EPI_ISL_413588 -----
EPI_ISL_413589 -----
EPI_ISL_424221 -----
EPI_ISL_424233 -----
EPI_ISL_424236 -----
EPI_ISL_424238 -----
EPI_ISL_424248 -----
EPI_ISL_424254 -----
EPI_ISL_425548 -----
EPI_ISL_425581 -----
EPI_ISL_426881 -----
EPI_ISL_426883 -----
EPI_ISL_426888 -----
EPI_ISL_426900 -----
EPI_ISL_426901 -----
EPI_ISL_426903 -----
EPI_ISL_426904 -----
EPI_ISL_426907 -----
EPI_ISL_426910 -----
ORF1ab          4681 YWDQTYHPNCVNCLDDRCILHCANFNVLVSTVFPPTSFGPLVRKIFVDGVPFVVSTGYHF
EPI_ISL_413575 -----
EPI_ISL_413588 -----
EPI_ISL_413589 -----
EPI_ISL_424221 -----
EPI_ISL_424233 -----
EPI_ISL_424236 -----
EPI_ISL_424238 -----
EPI_ISL_424248 -----
EPI_ISL_424254 -----
EPI_ISL_425548 -----
EPI_ISL_425581 -----
EPI_ISL_426881 -----
EPI_ISL_426883 -----
EPI_ISL_426888 -----
EPI_ISL_426900 -----
EPI_ISL_426901 -----
EPI_ISL_426903 -----
EPI_ISL_426904 -----
EPI_ISL_426907 -----
EPI_ISL_426910 -----
```

ORF1ab 4741 RELGVVHNQDVNLHSSRLSFKELLVYAADPAMHAASGNLLLLDKRTTCFSVAALTNNVAFQ  
EPI\_ISL\_413575 -----  
EPI\_ISL\_413588 -----  
EPI\_ISL\_413589 -----  
EPI\_ISL\_424221 -----  
EPI\_ISL\_424233 -----  
EPI\_ISL\_424236 -----  
EPI\_ISL\_424238 -----  
EPI\_ISL\_424248 -----  
EPI\_ISL\_424254 -----  
EPI\_ISL\_425548 -----  
EPI\_ISL\_425581 -----  
EPI\_ISL\_426881 -----  
EPI\_ISL\_426883 -----  
EPI\_ISL\_426888 -----  
EPI\_ISL\_426900 -----  
EPI\_ISL\_426901 -----  
EPI\_ISL\_426903 -----  
EPI\_ISL\_426904 -----  
EPI\_ISL\_426907 -----  
EPI\_ISL\_426910 -----  
ORF1ab 4741 RELGVVHNQDVNLHSSRLSFKELLVYAADPAMHAASGNLLLLDKRTTCFSVAALTNNVAFQ  
EPI\_ISL\_413575 -----  
EPI\_ISL\_413588 -----  
EPI\_ISL\_413589 -----  
EPI\_ISL\_424221 -----  
EPI\_ISL\_424233 -----  
EPI\_ISL\_424236 -----  
EPI\_ISL\_424238 -----  
EPI\_ISL\_424248 -----  
EPI\_ISL\_424254 -----  
EPI\_ISL\_425548 -----  
EPI\_ISL\_425581 -----  
EPI\_ISL\_426881 -----  
EPI\_ISL\_426883 -----  
EPI\_ISL\_426888 -----  
EPI\_ISL\_426900 -----  
EPI\_ISL\_426901 -----  
EPI\_ISL\_426903 -----  
EPI\_ISL\_426904 -----  
EPI\_ISL\_426907 -----  
EPI\_ISL\_426910 -----



```
ORF1ab          4801 TVKPGNFNKDFYDFAVSKGFFKEGSSVELKHFFFAQDGNAAISDYDYRYNLPTMCDIRQ
EPI_ISL_413575 -----
EPI_ISL_413588 -----
EPI_ISL_413589 -----
EPI_ISL_424221 -----
EPI_ISL_424233 -----
EPI_ISL_424236 -----
EPI_ISL_424238 -----
EPI_ISL_424248 -----
EPI_ISL_424254 -----
EPI_ISL_425548 -----
EPI_ISL_425581 -----
EPI_ISL_426881 -----
EPI_ISL_426883 -----
EPI_ISL_426888 -----
EPI_ISL_426900 -----
EPI_ISL_426901 -----
EPI_ISL_426903 -----
EPI_ISL_426904 -----
EPI_ISL_426907 -----
EPI_ISL_426910 -----
ORF1ab          4801 TVKPGNFNKDFYDFAVSKGFFKEGSSVELKHFFFAQDGNAAISDYDYRYNLPTMCDIRQ
EPI_ISL_413575 -----
EPI_ISL_413588 -----
EPI_ISL_413589 -----
EPI_ISL_424221 -----
EPI_ISL_424233 -----
EPI_ISL_424236 -----
EPI_ISL_424238 -----
EPI_ISL_424248 -----
EPI_ISL_424254 -----
EPI_ISL_425548 -----
EPI_ISL_425581 -----
EPI_ISL_426881 -----
EPI_ISL_426883 -----
EPI_ISL_426888 -----
EPI_ISL_426900 -----
EPI_ISL_426901 -----
EPI_ISL_426903 -----
EPI_ISL_426904 -----
EPI_ISL_426907 -----
EPI_ISL_426910 -----
```

ORF1ab 4861 LLFVVEVVDKYFDCYDGGCINANQVIVNNLDKSAGFPFNKWKARLYYDSMSYEDQDALF  
EPI\_ISL\_413575 -----  
EPI\_ISL\_413588 -----  
EPI\_ISL\_413589 -----  
EPI\_ISL\_424221 -----  
EPI\_ISL\_424233 -----  
EPI\_ISL\_424236 -----  
EPI\_ISL\_424238 -----  
EPI\_ISL\_424248 -----  
EPI\_ISL\_424254 -----  
EPI\_ISL\_425548 -----  
EPI\_ISL\_425581 -----  
EPI\_ISL\_426881 -----  
EPI\_ISL\_426883 -----  
EPI\_ISL\_426888 -----  
EPI\_ISL\_426900 -----  
EPI\_ISL\_426901 -----  
EPI\_ISL\_426903 -----  
EPI\_ISL\_426904 -----  
EPI\_ISL\_426907 -----  
EPI\_ISL\_426910 -----  
ORF1ab 4861 LLFVVEVVDKYFDCYDGGCINANQVIVNNLDKSAGFPFNKWKARLYYDSMSYEDQDALF  
EPI\_ISL\_413575 -----  
EPI\_ISL\_413588 -----  
EPI\_ISL\_413589 -----  
EPI\_ISL\_424221 -----  
EPI\_ISL\_424233 -----  
EPI\_ISL\_424236 -----  
EPI\_ISL\_424238 -----  
EPI\_ISL\_424248 -----  
EPI\_ISL\_424254 -----  
EPI\_ISL\_425548 -----  
EPI\_ISL\_425581 -----  
EPI\_ISL\_426881 -----  
EPI\_ISL\_426883 -----  
EPI\_ISL\_426888 -----  
EPI\_ISL\_426900 -----  
EPI\_ISL\_426901 -----  
EPI\_ISL\_426903 -----  
EPI\_ISL\_426904 -----  
EPI\_ISL\_426907 -----  
EPI\_ISL\_426910 -----

ORF1ab 4921 AYTKRNVIPITITQMNLYAISAKNRARTVAGVSICTMTNRQFHQKLLKLSIAATRGATVV  
EPI\_ISL\_413575 -----  
EPI\_ISL\_413588 -----  
EPI\_ISL\_413589 -----  
EPI\_ISL\_424221 -----  
EPI\_ISL\_424233 -----  
EPI\_ISL\_424236 -----  
EPI\_ISL\_424238 -----  
EPI\_ISL\_424248 -----  
EPI\_ISL\_424254 -----  
EPI\_ISL\_425548 -----  
EPI\_ISL\_425581 -----  
EPI\_ISL\_426881 -----  
EPI\_ISL\_426883 -----  
EPI\_ISL\_426888 -----  
EPI\_ISL\_426900 -----  
EPI\_ISL\_426901 -----  
EPI\_ISL\_426903 -----  
EPI\_ISL\_426904 -----  
EPI\_ISL\_426907 -----  
EPI\_ISL\_426910 -----  
ORF1ab 4921 AYTKRNVIPITITQMNLYAISAKNRARTVAGVSICTMTNRQFHQKLLKLSIAATRGATVV  
EPI\_ISL\_413575 -----  
EPI\_ISL\_413588 -----  
EPI\_ISL\_413589 -----  
EPI\_ISL\_424221 -----  
EPI\_ISL\_424233 -----  
EPI\_ISL\_424236 -----  
EPI\_ISL\_424238 -----  
EPI\_ISL\_424248 -----  
EPI\_ISL\_424254 -----  
EPI\_ISL\_425548 -----  
EPI\_ISL\_425581 -----  
EPI\_ISL\_426881 -----  
EPI\_ISL\_426883 -----  
EPI\_ISL\_426888 -----  
EPI\_ISL\_426900 -----  
EPI\_ISL\_426901 -----  
EPI\_ISL\_426903 -----  
EPI\_ISL\_426904 -----  
EPI\_ISL\_426907 -----  
EPI\_ISL\_426910 -----

```
ORF1ab          4981 IGTSKIFYGGWHNMLKTVYSDVENPHLMGWDYPKCDRAMPNMLRIMASLVLARKHTTCCSL
EPI_ISL_413575 -----
EPI_ISL_413588 -----
EPI_ISL_413589 -----
EPI_ISL_424221 -----
EPI_ISL_424233 -----
EPI_ISL_424236 -----
EPI_ISL_424238 -----
EPI_ISL_424248 -----
EPI_ISL_424254 -----
EPI_ISL_425548 -----
EPI_ISL_425581 -----
EPI_ISL_426881 -----
EPI_ISL_426883 -----
EPI_ISL_426888 -----
EPI_ISL_426900 -----
EPI_ISL_426901 -----
EPI_ISL_426903 -----
EPI_ISL_426904 -----
EPI_ISL_426907 -----
EPI_ISL_426910 -----
ORF1ab          4981 IGTSKIFYGGWHNMLKTVYSDVENPHLMGWDYPKCDRAMPNMLRIMASLVLARKHTTCCSL
EPI_ISL_413575 -----
EPI_ISL_413588 -----
EPI_ISL_413589 -----
EPI_ISL_424221 -----
EPI_ISL_424233 -----
EPI_ISL_424236 -----
EPI_ISL_424238 -----
EPI_ISL_424248 -----
EPI_ISL_424254 -----
EPI_ISL_425548 -----
EPI_ISL_425581 -----
EPI_ISL_426881 -----
EPI_ISL_426883 -----
EPI_ISL_426888 -----
EPI_ISL_426900 -----
EPI_ISL_426901 -----
EPI_ISL_426903 -----
EPI_ISL_426904 -----
EPI_ISL_426907 -----
EPI_ISL_426910 -----
```

ORF1ab 5041 SHRFYRLANECAQVLSEMVMCGGSLYVKPGGTSSGDATTAYANSVFNICQAVTANVNALL  
EPI\_ISL\_413575 -----  
EPI\_ISL\_413588 -----  
EPI\_ISL\_413589 -----  
EPI\_ISL\_424221 -----  
EPI\_ISL\_424233 -----  
EPI\_ISL\_424236 -----  
EPI\_ISL\_424238 -----  
EPI\_ISL\_424248 -----  
EPI\_ISL\_424254 -----  
EPI\_ISL\_425548 -----  
EPI\_ISL\_425581 -----  
EPI\_ISL\_426881 -----  
EPI\_ISL\_426883 -----  
EPI\_ISL\_426888 -----  
EPI\_ISL\_426900 -----  
EPI\_ISL\_426901 -----  
EPI\_ISL\_426903 -----  
EPI\_ISL\_426904 -----  
EPI\_ISL\_426907 -----  
EPI\_ISL\_426910 -----  
ORF1ab 5041 SHRFYRLANECAQVLSEMVMCGGSLYVKPGGTSSGDATTAYANSVFNICQAVTANVNALL  
EPI\_ISL\_413575 -----  
EPI\_ISL\_413588 -----  
EPI\_ISL\_413589 -----  
EPI\_ISL\_424221 -----  
EPI\_ISL\_424233 -----  
EPI\_ISL\_424236 -----  
EPI\_ISL\_424238 -----  
EPI\_ISL\_424248 -----  
EPI\_ISL\_424254 -----  
EPI\_ISL\_425548 -----  
EPI\_ISL\_425581 -----  
EPI\_ISL\_426881 -----  
EPI\_ISL\_426883 -----  
EPI\_ISL\_426888 -----  
EPI\_ISL\_426900 -----  
EPI\_ISL\_426901 -----  
EPI\_ISL\_426903 -----  
EPI\_ISL\_426904 -----  
EPI\_ISL\_426907 -----  
EPI\_ISL\_426910 -----

ORF1ab 5101 STDGNKIADKYVRNLQHRLYECLYRNRDVDTDFVNEFYAYLRKHFSMMILSDDAVVCFNS  
EPI\_ISL\_413575 -----  
EPI\_ISL\_413588 -----  
EPI\_ISL\_413589 -----  
EPI\_ISL\_424221 -----  
EPI\_ISL\_424233 -----  
EPI\_ISL\_424236 -----  
EPI\_ISL\_424238 -----  
EPI\_ISL\_424248 -----  
EPI\_ISL\_424254 -----  
EPI\_ISL\_425548 -----  
EPI\_ISL\_425581 -----  
EPI\_ISL\_426881 -----  
EPI\_ISL\_426883 -----  
EPI\_ISL\_426888 -----  
EPI\_ISL\_426900 -----  
EPI\_ISL\_426901 -----  
EPI\_ISL\_426903 -----  
EPI\_ISL\_426904 -----  
EPI\_ISL\_426907 -----  
EPI\_ISL\_426910 -----  
ORF1ab 5101 STDGNKIADKYVRNLQHRLYECLYRNRDVDTDFVNEFYAYLRKHFSMMILSDDAVVCFNS  
EPI\_ISL\_413575 -----  
EPI\_ISL\_413588 -----  
EPI\_ISL\_413589 -----  
EPI\_ISL\_424221 -----  
EPI\_ISL\_424233 -----  
EPI\_ISL\_424236 -----  
EPI\_ISL\_424238 -----  
EPI\_ISL\_424248 -----  
EPI\_ISL\_424254 -----  
EPI\_ISL\_425548 -----  
EPI\_ISL\_425581 -----  
EPI\_ISL\_426881 -----  
EPI\_ISL\_426883 -----  
EPI\_ISL\_426888 -----  
EPI\_ISL\_426900 -----  
EPI\_ISL\_426901 -----  
EPI\_ISL\_426903 -----  
EPI\_ISL\_426904 -----  
EPI\_ISL\_426907 -----  
EPI\_ISL\_426910 -----

```
ORF1ab          5161 TYASQGLVASIKNFKSVLYYQNNVFMSEAKCWTETDLTKGPHEFCSQHTMLVKQGDDYVY
EPI_ISL_413575 -----
EPI_ISL_413588 -----
EPI_ISL_413589 -----
EPI_ISL_424221 -----
EPI_ISL_424233 -----
EPI_ISL_424236 -----
EPI_ISL_424238 -----
EPI_ISL_424248 -----
EPI_ISL_424254 -----
EPI_ISL_425548 -----
EPI_ISL_425581 -----
EPI_ISL_426881 -----
EPI_ISL_426883 -----
EPI_ISL_426888 -----
EPI_ISL_426900 -----
EPI_ISL_426901 -----
EPI_ISL_426903 -----
EPI_ISL_426904 -----
EPI_ISL_426907 -----
EPI_ISL_426910 -----
ORF1ab          5161 TYASQGLVASIKNFKSVLYYQNNVFMSEAKCWTETDLTKGPHEFCSQHTMLVKQGDDYVY
EPI_ISL_413575 -----
EPI_ISL_413588 -----
EPI_ISL_413589 -----
EPI_ISL_424221 -----
EPI_ISL_424233 -----
EPI_ISL_424236 -----
EPI_ISL_424238 -----
EPI_ISL_424248 -----
EPI_ISL_424254 -----
EPI_ISL_425548 -----
EPI_ISL_425581 -----
EPI_ISL_426881 -----
EPI_ISL_426883 -----
EPI_ISL_426888 -----
EPI_ISL_426900 -----
EPI_ISL_426901 -----
EPI_ISL_426903 -----
EPI_ISL_426904 -----
EPI_ISL_426907 -----
EPI_ISL_426910 -----
```

ORF1ab 5221 LPYPDPSRILGAGCFVDDIVKTDGTLMIERFVSLAIDAYPLTKHPNQEYADVFLHYLQYI  
EPI\_ISL\_413575 -----  
EPI\_ISL\_413588 -----  
EPI\_ISL\_413589 -----  
EPI\_ISL\_424221 -----  
EPI\_ISL\_424233 -----  
EPI\_ISL\_424236 -----  
EPI\_ISL\_424238 -----  
EPI\_ISL\_424248 -----  
EPI\_ISL\_424254 -----  
EPI\_ISL\_425548 -----  
EPI\_ISL\_425581 -----  
EPI\_ISL\_426881 -----  
EPI\_ISL\_426883 -----  
EPI\_ISL\_426888 -----  
EPI\_ISL\_426900 -----  
EPI\_ISL\_426901 -----  
EPI\_ISL\_426903 -----  
EPI\_ISL\_426904 -----  
EPI\_ISL\_426907 -----  
EPI\_ISL\_426910 -----  
ORF1ab 5221 LPYPDPSRILGAGCFVDDIVKTDGTLMIERFVSLAIDAYPLTKHPNQEYADVFLHYLQYI  
EPI\_ISL\_413575 -----  
EPI\_ISL\_413588 -----  
EPI\_ISL\_413589 -----  
EPI\_ISL\_424221 -----  
EPI\_ISL\_424233 -----  
EPI\_ISL\_424236 -----  
EPI\_ISL\_424238 -----  
EPI\_ISL\_424248 -----  
EPI\_ISL\_424254 -----  
EPI\_ISL\_425548 -----  
EPI\_ISL\_425581 -----  
EPI\_ISL\_426881 -----  
EPI\_ISL\_426883 -----  
EPI\_ISL\_426888 -----  
EPI\_ISL\_426900 -----  
EPI\_ISL\_426901 -----  
EPI\_ISL\_426903 -----  
EPI\_ISL\_426904 -----  
EPI\_ISL\_426907 -----  
EPI\_ISL\_426910 -----



ORF1ab 5281 RKLHDELGTGHMLDMYSVMLTNDNTSRYWEPEFYEAMYTPHTVLQAVGACVLCNSQTSLRC  
EPI\_ISL\_413575 -----  
EPI\_ISL\_413588 -----  
EPI\_ISL\_413589 -----  
EPI\_ISL\_424221 -----  
EPI\_ISL\_424233 -----  
EPI\_ISL\_424236 -----  
EPI\_ISL\_424238 -----  
EPI\_ISL\_424248 -----  
EPI\_ISL\_424254 -----  
EPI\_ISL\_425548 -----  
EPI\_ISL\_425581 -----  
EPI\_ISL\_426881 -----  
EPI\_ISL\_426883 -----  
EPI\_ISL\_426888 -----  
EPI\_ISL\_426900 -----  
EPI\_ISL\_426901 -----  
EPI\_ISL\_426903 -----  
EPI\_ISL\_426904 -----  
EPI\_ISL\_426907 -----  
EPI\_ISL\_426910 -----  
ORF1ab 5281 RKLHDELGTGHMLDMYSVMLTNDNTSRYWEPEFYEAMYTPHTVLQAVGACVLCNSQTSLRC  
EPI\_ISL\_413575 -----  
EPI\_ISL\_413588 -----  
EPI\_ISL\_413589 -----  
EPI\_ISL\_424221 -----  
EPI\_ISL\_424233 -----  
EPI\_ISL\_424236 -----  
EPI\_ISL\_424238 -----  
EPI\_ISL\_424248 -----  
EPI\_ISL\_424254 -----  
EPI\_ISL\_425548 -----  
EPI\_ISL\_425581 -----  
EPI\_ISL\_426881 -----  
EPI\_ISL\_426883 -----  
EPI\_ISL\_426888 -----  
EPI\_ISL\_426900 -----  
EPI\_ISL\_426901 -----  
EPI\_ISL\_426903 -----  
EPI\_ISL\_426904 -----  
EPI\_ISL\_426907 -----  
EPI\_ISL\_426910 -----

ORF1ab 5341 GACIRRPFLCCKCCYDHVISTSHKLVLVSVNPYVCNAPGCDVTDVTDVTLQYLGGMSYYCKSHK  
EPI\_ISL\_413575 -----  
EPI\_ISL\_413588 -----  
EPI\_ISL\_413589 -----  
EPI\_ISL\_424221 -----  
EPI\_ISL\_424233 -----  
EPI\_ISL\_424236 -----  
EPI\_ISL\_424238 -----  
EPI\_ISL\_424248 -----  
EPI\_ISL\_424254 -----  
EPI\_ISL\_425548 -----  
EPI\_ISL\_425581 -----  
EPI\_ISL\_426881 -----  
EPI\_ISL\_426883 -----  
EPI\_ISL\_426888 -----  
EPI\_ISL\_426900 -----  
EPI\_ISL\_426901 -----  
EPI\_ISL\_426903 -----  
EPI\_ISL\_426904 -----  
EPI\_ISL\_426907 -----  
EPI\_ISL\_426910 -----  
ORF1ab 5341 GACIRRPFLCCKCCYDHVISTSHKLVLVSVNPYVCNAPGCDVTDVTDVTLQYLGGMSYYCKSHK  
EPI\_ISL\_413575 -----  
EPI\_ISL\_413588 -----  
EPI\_ISL\_413589 -----  
EPI\_ISL\_424221 -----  
EPI\_ISL\_424233 -----  
EPI\_ISL\_424236 -----  
EPI\_ISL\_424238 -----  
EPI\_ISL\_424248 -----  
EPI\_ISL\_424254 -----  
EPI\_ISL\_425548 -----  
EPI\_ISL\_425581 -----  
EPI\_ISL\_426881 -----  
EPI\_ISL\_426883 -----  
EPI\_ISL\_426888 -----  
EPI\_ISL\_426900 -----  
EPI\_ISL\_426901 -----  
EPI\_ISL\_426903 -----  
EPI\_ISL\_426904 -----  
EPI\_ISL\_426907 -----  
EPI\_ISL\_426910 -----

ORF1ab 5401 PPISFPLCANGQVFGLYKNTCVGSDNVTDFNAIATCDWTNAGDYILANTCTERLKLFAAE  
EPI\_ISL\_413575 -----  
EPI\_ISL\_413588 -----  
EPI\_ISL\_413589 -----  
EPI\_ISL\_424221 -----  
EPI\_ISL\_424233 -----  
EPI\_ISL\_424236 -----  
EPI\_ISL\_424238 -----  
EPI\_ISL\_424248 -----  
EPI\_ISL\_424254 -----  
EPI\_ISL\_425548 -----  
EPI\_ISL\_425581 -----  
EPI\_ISL\_426881 -----  
EPI\_ISL\_426883 -----  
EPI\_ISL\_426888 -----  
EPI\_ISL\_426900 -----  
EPI\_ISL\_426901 -----  
EPI\_ISL\_426903 -----  
EPI\_ISL\_426904 -----  
EPI\_ISL\_426907 -----  
EPI\_ISL\_426910 -----  
ORF1ab 5401 PPISFPLCANGQVFGLYKNTCVGSDNVTDFNAIATCDWTNAGDYILANTCTERLKLFAAE  
EPI\_ISL\_413575 -----  
EPI\_ISL\_413588 -----  
EPI\_ISL\_413589 -----  
EPI\_ISL\_424221 -----  
EPI\_ISL\_424233 -----  
EPI\_ISL\_424236 -----  
EPI\_ISL\_424238 -----  
EPI\_ISL\_424248 -----  
EPI\_ISL\_424254 -----  
EPI\_ISL\_425548 -----  
EPI\_ISL\_425581 -----  
EPI\_ISL\_426881 -----  
EPI\_ISL\_426883 -----  
EPI\_ISL\_426888 -----  
EPI\_ISL\_426900 -----  
EPI\_ISL\_426901 -----  
EPI\_ISL\_426903 -----  
EPI\_ISL\_426904 -----  
EPI\_ISL\_426907 -----  
EPI\_ISL\_426910 -----

ORF1ab 5461 TLKATEETFKLSYGIATVREVLSDRELHLSWEVGKPRPPLNRNYVFTGYRVTKNSKVQIG  
EPI\_ISL\_413575 -----  
EPI\_ISL\_413588 -----  
EPI\_ISL\_413589 -----  
EPI\_ISL\_424221 -----  
EPI\_ISL\_424233 -----  
EPI\_ISL\_424236 -----  
EPI\_ISL\_424238 -----  
EPI\_ISL\_424248 -----  
EPI\_ISL\_424254 -----  
EPI\_ISL\_425548 -----  
EPI\_ISL\_425581 -----  
EPI\_ISL\_426881 -----  
EPI\_ISL\_426883 -----  
EPI\_ISL\_426888 -----  
EPI\_ISL\_426900 -----  
EPI\_ISL\_426901 -----  
EPI\_ISL\_426903 -----  
EPI\_ISL\_426904 -----  
EPI\_ISL\_426907 -----  
EPI\_ISL\_426910 -----  
ORF1ab 5461 TLKATEETFKLSYGIATVREVLSDRELHLSWEVGKPRPPLNRNYVFTGYRVTKNSKVQIG  
EPI\_ISL\_413575 -----  
EPI\_ISL\_413588 -----  
EPI\_ISL\_413589 -----  
EPI\_ISL\_424221 -----  
EPI\_ISL\_424233 -----  
EPI\_ISL\_424236 -----  
EPI\_ISL\_424238 -----  
EPI\_ISL\_424248 -----  
EPI\_ISL\_424254 -----  
EPI\_ISL\_425548 -----  
EPI\_ISL\_425581 -----  
EPI\_ISL\_426881 -----  
EPI\_ISL\_426883 -----  
EPI\_ISL\_426888 -----  
EPI\_ISL\_426900 -----  
EPI\_ISL\_426901 -----  
EPI\_ISL\_426903 -----  
EPI\_ISL\_426904 -----  
EPI\_ISL\_426907 -----  
EPI\_ISL\_426910 -----

```
ORF1ab          5521 EYTFEKGDYGDVAVYRGTTTTYKLVNGDYFVLTSHTVMPLSAPTLVLPQEHYVRITGLYPTL
EPI_ISL_413575 -----
EPI_ISL_413588 -----
EPI_ISL_413589 -----
EPI_ISL_424221 -----
EPI_ISL_424233 -----
EPI_ISL_424236 -----
EPI_ISL_424238 -----
EPI_ISL_424248 -----
EPI_ISL_424254 -----
EPI_ISL_425548 -----
EPI_ISL_425581 -----
EPI_ISL_426881 -----
EPI_ISL_426883 -----
EPI_ISL_426888 -----
EPI_ISL_426900 -----
EPI_ISL_426901 -----
EPI_ISL_426903 -----
EPI_ISL_426904 -----
EPI_ISL_426907 -----
EPI_ISL_426910 -----
ORF1ab          5521 EYTFEKGDYGDVAVYRGTTTTYKLVNGDYFVLTSHTVMPLSAPTLVLPQEHYVRITGLYPTL
EPI_ISL_413575 -----
EPI_ISL_413588 -----
EPI_ISL_413589 -----
EPI_ISL_424221 -----
EPI_ISL_424233 -----
EPI_ISL_424236 -----
EPI_ISL_424238 -----
EPI_ISL_424248 -----
EPI_ISL_424254 -----
EPI_ISL_425548 -----
EPI_ISL_425581 -----
EPI_ISL_426881 -----
EPI_ISL_426883 -----
EPI_ISL_426888 -----
EPI_ISL_426900 -----
EPI_ISL_426901 -----
EPI_ISL_426903 -----
EPI_ISL_426904 -----
EPI_ISL_426907 -----
EPI_ISL_426910 -----
```

ORF1ab 5581 NISDEFSSNVANYQKVGMQKYSTLQGPPGTGKSHFAIGLALYYPSARIVYTACSHAAVDA  
EPI\_ISL\_413575 -----  
EPI\_ISL\_413588 -----  
EPI\_ISL\_413589 -----  
EPI\_ISL\_424221 -----  
EPI\_ISL\_424233 -----  
EPI\_ISL\_424236 -----  
EPI\_ISL\_424238 -----  
EPI\_ISL\_424248 -----  
EPI\_ISL\_424254 -----  
EPI\_ISL\_425548 -----  
EPI\_ISL\_425581 -----  
EPI\_ISL\_426881 -----  
EPI\_ISL\_426883 -----  
EPI\_ISL\_426888 -----  
EPI\_ISL\_426900 -----  
EPI\_ISL\_426901 -----  
EPI\_ISL\_426903 -----  
EPI\_ISL\_426904 -----  
EPI\_ISL\_426907 -----  
EPI\_ISL\_426910 -----  
ORF1ab 5581 NISDEFSSNVANYQKVGMQKYSTLQGPPGTGKSHFAIGLALYYPSARIVYTACSHAAVDA  
EPI\_ISL\_413575 -----  
EPI\_ISL\_413588 -----  
EPI\_ISL\_413589 -----  
EPI\_ISL\_424221 -----  
EPI\_ISL\_424233 -----  
EPI\_ISL\_424236 -----  
EPI\_ISL\_424238 -----  
EPI\_ISL\_424248 -----  
EPI\_ISL\_424254 -----  
EPI\_ISL\_425548 -----  
EPI\_ISL\_425581 -----  
EPI\_ISL\_426881 -----  
EPI\_ISL\_426883 -----  
EPI\_ISL\_426888 -----  
EPI\_ISL\_426900 -----  
EPI\_ISL\_426901 -----  
EPI\_ISL\_426903 -----  
EPI\_ISL\_426904 -----  
EPI\_ISL\_426907 -----  
EPI\_ISL\_426910 -----

ORF1ab 5641 LCEKALKYLPIDKCSRIIPARARVECFDKFKVNSTLEQYVFCTVNALPETTADIVVFDEI  
EPI\_ISL\_413575 -----  
EPI\_ISL\_413588 -----  
EPI\_ISL\_413589 -----  
EPI\_ISL\_424221 -----  
EPI\_ISL\_424233 -----  
EPI\_ISL\_424236 -----  
EPI\_ISL\_424238 -----  
EPI\_ISL\_424248 -----  
EPI\_ISL\_424254 -----  
EPI\_ISL\_425548 -----  
EPI\_ISL\_425581 -----  
EPI\_ISL\_426881 -----  
EPI\_ISL\_426883 -----  
EPI\_ISL\_426888 -----  
EPI\_ISL\_426900 -----  
EPI\_ISL\_426901 -----  
EPI\_ISL\_426903 -----  
EPI\_ISL\_426904 -----  
EPI\_ISL\_426907 -----  
EPI\_ISL\_426910 -----  
ORF1ab 5641 LCEKALKYLPIDKCSRIIPARARVECFDKFKVNSTLEQYVFCTVNALPETTADIVVFDEI  
EPI\_ISL\_413575 -----  
EPI\_ISL\_413588 -----  
EPI\_ISL\_413589 -----  
EPI\_ISL\_424221 -----  
EPI\_ISL\_424233 -----  
EPI\_ISL\_424236 -----  
EPI\_ISL\_424238 -----  
EPI\_ISL\_424248 -----  
EPI\_ISL\_424254 -----  
EPI\_ISL\_425548 -----  
EPI\_ISL\_425581 -----  
EPI\_ISL\_426881 -----  
EPI\_ISL\_426883 -----  
EPI\_ISL\_426888 -----  
EPI\_ISL\_426900 -----  
EPI\_ISL\_426901 -----  
EPI\_ISL\_426903 -----  
EPI\_ISL\_426904 -----  
EPI\_ISL\_426907 -----  
EPI\_ISL\_426910 -----

ORF1ab 5701 SMATNYDLSVNVNARLRAKHYVYIGDPAQLPAPRTLLTKGTLEPEYFNNSVCRLMKTIGPDM  
EPI\_ISL\_413575 -----  
EPI\_ISL\_413588 -----  
EPI\_ISL\_413589 -----  
EPI\_ISL\_424221 -----  
EPI\_ISL\_424233 -----  
EPI\_ISL\_424236 -----  
EPI\_ISL\_424238 -----  
EPI\_ISL\_424248 -----  
EPI\_ISL\_424254 -----  
EPI\_ISL\_425548 -----  
EPI\_ISL\_425581 -----  
EPI\_ISL\_426881 -----  
EPI\_ISL\_426883 -----  
EPI\_ISL\_426888 -----  
EPI\_ISL\_426900 -----  
EPI\_ISL\_426901 -----  
EPI\_ISL\_426903 -----  
EPI\_ISL\_426904 -----  
EPI\_ISL\_426907 -----  
EPI\_ISL\_426910 -----  
ORF1ab 5701 SMATNYDLSVNVNARLRAKHYVYIGDPAQLPAPRTLLTKGTLEPEYFNNSVCRLMKTIGPDM  
EPI\_ISL\_413575 -----  
EPI\_ISL\_413588 -----  
EPI\_ISL\_413589 -----  
EPI\_ISL\_424221 -----  
EPI\_ISL\_424233 -----  
EPI\_ISL\_424236 -----  
EPI\_ISL\_424238 -----  
EPI\_ISL\_424248 -----  
EPI\_ISL\_424254 -----  
EPI\_ISL\_425548 -----  
EPI\_ISL\_425581 -----  
EPI\_ISL\_426881 -----  
EPI\_ISL\_426883 -----  
EPI\_ISL\_426888 -----  
EPI\_ISL\_426900 -----  
EPI\_ISL\_426901 -----  
EPI\_ISL\_426903 -----  
EPI\_ISL\_426904 -----  
EPI\_ISL\_426907 -----  
EPI\_ISL\_426910 -----



ORF1ab 5761 FLGTCRRCPAEIVDTVSALVYDNKCLKAHKDKSAQCCKMFKYKGVITHDVSSAINRPQIGVV  
EPI\_ISL\_413575 -----  
EPI\_ISL\_413588 -----  
EPI\_ISL\_413589 -----  
EPI\_ISL\_424221 -----  
EPI\_ISL\_424233 -----  
EPI\_ISL\_424236 -----  
EPI\_ISL\_424238 -----  
EPI\_ISL\_424248 -----  
EPI\_ISL\_424254 -----  
EPI\_ISL\_425548 -----  
EPI\_ISL\_425581 -----  
EPI\_ISL\_426881 -----  
EPI\_ISL\_426883 -----  
EPI\_ISL\_426888 -----  
EPI\_ISL\_426900 -----  
EPI\_ISL\_426901 -----  
EPI\_ISL\_426903 -----  
EPI\_ISL\_426904 -----  
EPI\_ISL\_426907 -----  
EPI\_ISL\_426910 -----  
ORF1ab 5761 FLGTCRRCPAEIVDTVSALVYDNKCLKAHKDKSAQCCKMFKYKGVITHDVSSAINRPQIGVV  
EPI\_ISL\_413575 -----  
EPI\_ISL\_413588 -----  
EPI\_ISL\_413589 -----  
EPI\_ISL\_424221 -----  
EPI\_ISL\_424233 -----  
EPI\_ISL\_424236 -----  
EPI\_ISL\_424238 -----  
EPI\_ISL\_424248 -----  
EPI\_ISL\_424254 -----  
EPI\_ISL\_425548 -----  
EPI\_ISL\_425581 -----  
EPI\_ISL\_426881 -----  
EPI\_ISL\_426883 -----  
EPI\_ISL\_426888 -----  
EPI\_ISL\_426900 -----  
EPI\_ISL\_426901 -----  
EPI\_ISL\_426903 -----  
EPI\_ISL\_426904 -----  
EPI\_ISL\_426907 -----  
EPI\_ISL\_426910 -----

ORF1ab 5821 REFLTRNPAWRKAVFISPYNSQNAVASKILGLPTQTVDSSQGSEYDYVIFTQTETAHSC  
EPI\_ISL\_413575 -----  
EPI\_ISL\_413588 -----  
EPI\_ISL\_413589 -----  
EPI\_ISL\_424221 -----  
EPI\_ISL\_424233 -----  
EPI\_ISL\_424236 -----  
EPI\_ISL\_424238 -----  
EPI\_ISL\_424248 -----  
EPI\_ISL\_424254 -----  
EPI\_ISL\_425548 -----  
EPI\_ISL\_425581 -----  
EPI\_ISL\_426881 -----  
EPI\_ISL\_426883 -----  
EPI\_ISL\_426888 -----  
EPI\_ISL\_426900 -----  
EPI\_ISL\_426901 -----  
EPI\_ISL\_426903 -----  
EPI\_ISL\_426904 -----  
EPI\_ISL\_426907 -----  
EPI\_ISL\_426910 -----  
ORF1ab 5821 REFLTRNPAWRKAVFISPYNSQNAVASKILGLPTQTVDSSQGSEYDYVIFTQTETAHSC  
EPI\_ISL\_413575 -----  
EPI\_ISL\_413588 -----  
EPI\_ISL\_413589 -----  
EPI\_ISL\_424221 -----  
EPI\_ISL\_424233 -----  
EPI\_ISL\_424236 -----  
EPI\_ISL\_424238 -----  
EPI\_ISL\_424248 -----  
EPI\_ISL\_424254 -----  
EPI\_ISL\_425548 -----  
EPI\_ISL\_425581 -----  
EPI\_ISL\_426881 -----  
EPI\_ISL\_426883 -----  
EPI\_ISL\_426888 -----  
EPI\_ISL\_426900 -----  
EPI\_ISL\_426901 -----  
EPI\_ISL\_426903 -----  
EPI\_ISL\_426904 -----  
EPI\_ISL\_426907 -----  
EPI\_ISL\_426910 -----

ORF1ab 5881 NVNRFNVAITRAKVGILCIMSDRDLYDKLQFTSLEIPRRNVATLQAENVTGLFKDCSKVI  
EPI\_ISL\_413575 -----  
EPI\_ISL\_413588 -----  
EPI\_ISL\_413589 -----  
EPI\_ISL\_424221 -----  
EPI\_ISL\_424233 -----  
EPI\_ISL\_424236 -----  
EPI\_ISL\_424238 -----  
EPI\_ISL\_424248 -----  
EPI\_ISL\_424254 -----  
EPI\_ISL\_425548 -----  
EPI\_ISL\_425581 -----  
EPI\_ISL\_426881 -----  
EPI\_ISL\_426883 -----  
EPI\_ISL\_426888 -----  
EPI\_ISL\_426900 -----  
EPI\_ISL\_426901 -----  
EPI\_ISL\_426903 -----  
EPI\_ISL\_426904 -----  
EPI\_ISL\_426907 -----  
EPI\_ISL\_426910 -----  
ORF1ab 5881 NVNRFNVAITRAKVGILCIMSDRDLYDKLQFTSLEIPRRNVATLQAENVTGLFKDCSKVI  
EPI\_ISL\_413575 -----  
EPI\_ISL\_413588 -----  
EPI\_ISL\_413589 -----  
EPI\_ISL\_424221 -----  
EPI\_ISL\_424233 -----  
EPI\_ISL\_424236 -----  
EPI\_ISL\_424238 -----  
EPI\_ISL\_424248 -----  
EPI\_ISL\_424254 -----  
EPI\_ISL\_425548 -----  
EPI\_ISL\_425581 -----  
EPI\_ISL\_426881 -----  
EPI\_ISL\_426883 -----  
EPI\_ISL\_426888 -----  
EPI\_ISL\_426900 -----  
EPI\_ISL\_426901 -----  
EPI\_ISL\_426903 -----  
EPI\_ISL\_426904 -----  
EPI\_ISL\_426907 -----  
EPI\_ISL\_426910 -----

ORF1ab 5941 TGLHPTQAPTHLSVDTKFKTEGLCVDIPGIPKDMTYRRLISMMGFKMNYQVNGYPNMFIT  
EPI\_ISL\_413575 -----  
EPI\_ISL\_413588 -----  
EPI\_ISL\_413589 -----  
EPI\_ISL\_424221 -----  
EPI\_ISL\_424233 -----  
EPI\_ISL\_424236 -----  
EPI\_ISL\_424238 -----  
EPI\_ISL\_424248 -----  
EPI\_ISL\_424254 -----  
EPI\_ISL\_425548 -----  
EPI\_ISL\_425581 -----  
EPI\_ISL\_426881 -----  
EPI\_ISL\_426883 -----  
EPI\_ISL\_426888 -----  
EPI\_ISL\_426900 -----  
EPI\_ISL\_426901 -----  
EPI\_ISL\_426903 -----  
EPI\_ISL\_426904 -----  
EPI\_ISL\_426907 -----  
EPI\_ISL\_426910 -----  
ORF1ab 5941 TGLHPTQAPTHLSVDTKFKTEGLCVDIPGIPKDMTYRRLISMMGFKMNYQVNGYPNMFIT  
EPI\_ISL\_413575 -----  
EPI\_ISL\_413588 -----  
EPI\_ISL\_413589 -----  
EPI\_ISL\_424221 -----  
EPI\_ISL\_424233 -----  
EPI\_ISL\_424236 -----  
EPI\_ISL\_424238 -----  
EPI\_ISL\_424248 -----  
EPI\_ISL\_424254 -----  
EPI\_ISL\_425548 -----  
EPI\_ISL\_425581 -----  
EPI\_ISL\_426881 -----  
EPI\_ISL\_426883 -----  
EPI\_ISL\_426888 -----  
EPI\_ISL\_426900 -----  
EPI\_ISL\_426901 -----  
EPI\_ISL\_426903 -----  
EPI\_ISL\_426904 -----  
EPI\_ISL\_426907 -----  
EPI\_ISL\_426910 -----

```
ORF1ab          6001 REEAIHVRAWIGFDVEGCHATREAVGTNLPLQLGFSTGVNLVAVPTGYVDTPNNTDFSR
EPI_ISL_413575 -----
EPI_ISL_413588 -----
EPI_ISL_413589 -----
EPI_ISL_424221 -----
EPI_ISL_424233 -----
EPI_ISL_424236 -----
EPI_ISL_424238 -----
EPI_ISL_424248 -----
EPI_ISL_424254 -----
EPI_ISL_425548 -----
EPI_ISL_425581 -----
EPI_ISL_426881 -----
EPI_ISL_426883 -----
EPI_ISL_426888 -----
EPI_ISL_426900 -----
EPI_ISL_426901 -----
EPI_ISL_426903 -----
EPI_ISL_426904 -----
EPI_ISL_426907 -----
EPI_ISL_426910 -----
ORF1ab          6001 REEAIHVRAWIGFDVEGCHATREAVGTNLPLQLGFSTGVNLVAVPTGYVDTPNNTDFSR
EPI_ISL_413575 -----
EPI_ISL_413588 -----
EPI_ISL_413589 -----
EPI_ISL_424221 -----
EPI_ISL_424233 -----
EPI_ISL_424236 -----
EPI_ISL_424238 -----
EPI_ISL_424248 -----
EPI_ISL_424254 -----
EPI_ISL_425548 -----
EPI_ISL_425581 -----
EPI_ISL_426881 -----
EPI_ISL_426883 -----
EPI_ISL_426888 -----
EPI_ISL_426900 -----
EPI_ISL_426901 -----
EPI_ISL_426903 -----
EPI_ISL_426904 -----
EPI_ISL_426907 -----
EPI_ISL_426910 -----
```

ORFlab 6061 VSAKPPPGDQFKHLIPLMYKGLPWNVVRKIVQMLSDTLKNLSDRVVFVLWAHGFELTSM  
EPI\_ISL\_413575 -----  
EPI\_ISL\_413588 -----  
EPI\_ISL\_413589 -----  
EPI\_ISL\_424221 -----  
EPI\_ISL\_424233 -----  
EPI\_ISL\_424236 -----  
EPI\_ISL\_424238 -----  
EPI\_ISL\_424248 -----  
EPI\_ISL\_424254 -----  
EPI\_ISL\_425548 -----  
EPI\_ISL\_425581 -----  
EPI\_ISL\_426881 -----  
EPI\_ISL\_426883 -----  
EPI\_ISL\_426888 -----  
EPI\_ISL\_426900 -----  
EPI\_ISL\_426901 -----  
EPI\_ISL\_426903 -----  
EPI\_ISL\_426904 -----  
EPI\_ISL\_426907 -----  
EPI\_ISL\_426910 -----  
ORFlab 6061 VSAKPPPGDQFKHLIPLMYKGLPWNVVRKIVQMLSDTLKNLSDRVVFVLWAHGFELTSM  
EPI\_ISL\_413575 -----  
EPI\_ISL\_413588 -----  
EPI\_ISL\_413589 -----  
EPI\_ISL\_424221 -----  
EPI\_ISL\_424233 -----  
EPI\_ISL\_424236 -----  
EPI\_ISL\_424238 -----  
EPI\_ISL\_424248 -----  
EPI\_ISL\_424254 -----  
EPI\_ISL\_425548 -----  
EPI\_ISL\_425581 -----  
EPI\_ISL\_426881 -----  
EPI\_ISL\_426883 -----  
EPI\_ISL\_426888 -----  
EPI\_ISL\_426900 -----  
EPI\_ISL\_426901 -----  
EPI\_ISL\_426903 -----  
EPI\_ISL\_426904 -----  
EPI\_ISL\_426907 -----  
EPI\_ISL\_426910 -----

ORF1ab 6121 KYFVKIGPERTCCLCDRRATCFSTASDTYACWHHSIGFDYVYNPFMIDVQQWGFTGNLQS  
EPI\_ISL\_413575 -----  
EPI\_ISL\_413588 -----  
EPI\_ISL\_413589 -----  
EPI\_ISL\_424221 -----  
EPI\_ISL\_424233 -----  
EPI\_ISL\_424236 -----  
EPI\_ISL\_424238 -----  
EPI\_ISL\_424248 -----  
EPI\_ISL\_424254 -----  
EPI\_ISL\_425548 -----  
EPI\_ISL\_425581 -----  
EPI\_ISL\_426881 -----  
EPI\_ISL\_426883 -----  
EPI\_ISL\_426888 -----  
EPI\_ISL\_426900 -----  
EPI\_ISL\_426901 -----  
EPI\_ISL\_426903 -----  
EPI\_ISL\_426904 -----  
EPI\_ISL\_426907 -----  
EPI\_ISL\_426910 -----  
ORF1ab 6121 KYFVKIGPERTCCLCDRRATCFSTASDTYACWHHSIGFDYVYNPFMIDVQQWGFTGNLQS  
EPI\_ISL\_413575 -----  
EPI\_ISL\_413588 -----  
EPI\_ISL\_413589 -----  
EPI\_ISL\_424221 -----  
EPI\_ISL\_424233 -----  
EPI\_ISL\_424236 -----  
EPI\_ISL\_424238 -----  
EPI\_ISL\_424248 -----  
EPI\_ISL\_424254 -----  
EPI\_ISL\_425548 -----  
EPI\_ISL\_425581 -----  
EPI\_ISL\_426881 -----  
EPI\_ISL\_426883 -----  
EPI\_ISL\_426888 -----  
EPI\_ISL\_426900 -----  
EPI\_ISL\_426901 -----  
EPI\_ISL\_426903 -----  
EPI\_ISL\_426904 -----  
EPI\_ISL\_426907 -----  
EPI\_ISL\_426910 -----

ORF1ab 6181 NHDLYCQVHGNAHVASCDAIMTRCLAVHECFVKRVDWTIEYPIIGDELKINAACRKVQHM  
EPI\_ISL\_413575 -----  
EPI\_ISL\_413588 -----  
EPI\_ISL\_413589 -----  
EPI\_ISL\_424221 -----  
EPI\_ISL\_424233 -----  
EPI\_ISL\_424236 -----  
EPI\_ISL\_424238 -----  
EPI\_ISL\_424248 -----  
EPI\_ISL\_424254 -----  
EPI\_ISL\_425548 -----  
EPI\_ISL\_425581 -----  
EPI\_ISL\_426881 -----  
EPI\_ISL\_426883 -----  
EPI\_ISL\_426888 -----  
EPI\_ISL\_426900 -----  
EPI\_ISL\_426901 -----  
EPI\_ISL\_426903 -----  
EPI\_ISL\_426904 -----  
EPI\_ISL\_426907 -----  
EPI\_ISL\_426910 -----  
ORF1ab 6181 NHDLYCQVHGNAHVASCDAIMTRCLAVHECFVKRVDWTIEYPIIGDELKINAACRKVQHM  
EPI\_ISL\_413575 -----  
EPI\_ISL\_413588 -----  
EPI\_ISL\_413589 -----  
EPI\_ISL\_424221 -----  
EPI\_ISL\_424233 -----  
EPI\_ISL\_424236 -----  
EPI\_ISL\_424238 -----  
EPI\_ISL\_424248 -----  
EPI\_ISL\_424254 -----  
EPI\_ISL\_425548 -----  
EPI\_ISL\_425581 -----  
EPI\_ISL\_426881 -----  
EPI\_ISL\_426883 -----  
EPI\_ISL\_426888 -----  
EPI\_ISL\_426900 -----  
EPI\_ISL\_426901 -----  
EPI\_ISL\_426903 -----  
EPI\_ISL\_426904 -----  
EPI\_ISL\_426907 -----  
EPI\_ISL\_426910 -----



ORF1ab 6241 VVKAALLADKFPVLHDIGNPKAIKCVQADVEWKFYDAQPCSDKAYKIEELFYASYATHSD  
EPI\_ISL\_413575 -----  
EPI\_ISL\_413588 -----  
EPI\_ISL\_413589 -----  
EPI\_ISL\_424221 -----  
EPI\_ISL\_424233 -----  
EPI\_ISL\_424236 -----  
EPI\_ISL\_424238 -----  
EPI\_ISL\_424248 -----  
EPI\_ISL\_424254 -----  
EPI\_ISL\_425548 -----  
EPI\_ISL\_425581 -----  
EPI\_ISL\_426881 -----  
EPI\_ISL\_426883 -----  
EPI\_ISL\_426888 -----  
EPI\_ISL\_426900 -----  
EPI\_ISL\_426901 -----  
EPI\_ISL\_426903 -----  
EPI\_ISL\_426904 -----  
EPI\_ISL\_426907 -----  
EPI\_ISL\_426910 -----  
ORF1ab 6241 VVKAALLADKFPVLHDIGNPKAIKCVQADVEWKFYDAQPCSDKAYKIEELFYASYATHSD  
EPI\_ISL\_413575 -----  
EPI\_ISL\_413588 -----  
EPI\_ISL\_413589 -----  
EPI\_ISL\_424221 -----  
EPI\_ISL\_424233 -----  
EPI\_ISL\_424236 -----  
EPI\_ISL\_424238 -----  
EPI\_ISL\_424248 -----  
EPI\_ISL\_424254 -----  
EPI\_ISL\_425548 -----  
EPI\_ISL\_425581 -----  
EPI\_ISL\_426881 -----  
EPI\_ISL\_426883 -----  
EPI\_ISL\_426888 -----  
EPI\_ISL\_426900 -----  
EPI\_ISL\_426901 -----  
EPI\_ISL\_426903 -----  
EPI\_ISL\_426904 -----  
EPI\_ISL\_426907 -----  
EPI\_ISL\_426910 -----

ORF1ab 6301 KFTDGVCLFWNCNVDRYPANSIVCRFDTRVLSNLNLPGCDGGSLYVVKHAFHTPAFDKSA  
EPI\_ISL\_413575 -----  
EPI\_ISL\_413588 -----  
EPI\_ISL\_413589 -----  
EPI\_ISL\_424221 -----  
EPI\_ISL\_424233 -----  
EPI\_ISL\_424236 -----  
EPI\_ISL\_424238 -----  
EPI\_ISL\_424248 -----  
EPI\_ISL\_424254 -----  
EPI\_ISL\_425548 -----  
EPI\_ISL\_425581 -----  
EPI\_ISL\_426881 -----  
EPI\_ISL\_426883 -----  
EPI\_ISL\_426888 -----  
EPI\_ISL\_426900 -----  
EPI\_ISL\_426901 -----  
EPI\_ISL\_426903 -----  
EPI\_ISL\_426904 -----  
EPI\_ISL\_426907 -----  
EPI\_ISL\_426910 -----  
ORF1ab 6301 KFTDGVCLFWNCNVDRYPANSIVCRFDTRVLSNLNLPGCDGGSLYVVKHAFHTPAFDKSA  
EPI\_ISL\_413575 -----  
EPI\_ISL\_413588 -----  
EPI\_ISL\_413589 -----  
EPI\_ISL\_424221 -----  
EPI\_ISL\_424233 -----  
EPI\_ISL\_424236 -----  
EPI\_ISL\_424238 -----  
EPI\_ISL\_424248 -----  
EPI\_ISL\_424254 -----  
EPI\_ISL\_425548 -----  
EPI\_ISL\_425581 -----  
EPI\_ISL\_426881 -----  
EPI\_ISL\_426883 -----  
EPI\_ISL\_426888 -----  
EPI\_ISL\_426900 -----  
EPI\_ISL\_426901 -----  
EPI\_ISL\_426903 -----  
EPI\_ISL\_426904 -----  
EPI\_ISL\_426907 -----  
EPI\_ISL\_426910 -----

```
ORF1ab          6361 FVNLKQLPFFYYSDSPCESHGKQVVSDDIDYVPLKSATCITRCNLGGAVCRHHANEYRLYL
EPI_ISL_413575 -----
EPI_ISL_413588 -----
EPI_ISL_413589 -----
EPI_ISL_424221 -----
EPI_ISL_424233 -----
EPI_ISL_424236 -----
EPI_ISL_424238 -----
EPI_ISL_424248 -----
EPI_ISL_424254 -----
EPI_ISL_425548 -----
EPI_ISL_425581 -----
EPI_ISL_426881 -----
EPI_ISL_426883 -----
EPI_ISL_426888 -----
EPI_ISL_426900 -----
EPI_ISL_426901 -----
EPI_ISL_426903 -----
EPI_ISL_426904 -----
EPI_ISL_426907 -----
EPI_ISL_426910 -----
ORF1ab          6361 FVNLKQLPFFYYSDSPCESHGKQVVSDDIDYVPLKSATCITRCNLGGAVCRHHANEYRLYL
EPI_ISL_413575 -----
EPI_ISL_413588 -----
EPI_ISL_413589 -----
EPI_ISL_424221 -----
EPI_ISL_424233 -----
EPI_ISL_424236 -----
EPI_ISL_424238 -----
EPI_ISL_424248 -----
EPI_ISL_424254 -----
EPI_ISL_425548 -----
EPI_ISL_425581 -----
EPI_ISL_426881 -----
EPI_ISL_426883 -----
EPI_ISL_426888 -----
EPI_ISL_426900 -----
EPI_ISL_426901 -----
EPI_ISL_426903 -----
EPI_ISL_426904 -----
EPI_ISL_426907 -----
EPI_ISL_426910 -----
```

ORF1ab 6421 DAYNMMISAGFSLWVYKQFDTYNLWNTFTRLQSLNVAFNVVNKGHFDGQQGEVPSIIN  
EPI\_ISL\_413575 -----  
EPI\_ISL\_413588 -----  
EPI\_ISL\_413589 -----  
EPI\_ISL\_424221 -----  
EPI\_ISL\_424233 -----  
EPI\_ISL\_424236 -----  
EPI\_ISL\_424238 -----  
EPI\_ISL\_424248 -----  
EPI\_ISL\_424254 -----  
EPI\_ISL\_425548 -----  
EPI\_ISL\_425581 -----  
EPI\_ISL\_426881 -----  
EPI\_ISL\_426883 -----  
EPI\_ISL\_426888 -----  
EPI\_ISL\_426900 -----  
EPI\_ISL\_426901 -----  
EPI\_ISL\_426903 -----  
EPI\_ISL\_426904 -----  
EPI\_ISL\_426907 -----  
EPI\_ISL\_426910 -----  
ORF1ab 6421 DAYNMMISAGFSLWVYKQFDTYNLWNTFTRLQSLNVAFNVVNKGHFDGQQGEVPSIIN  
EPI\_ISL\_413575 -----  
EPI\_ISL\_413588 -----  
EPI\_ISL\_413589 -----  
EPI\_ISL\_424221 -----  
EPI\_ISL\_424233 -----  
EPI\_ISL\_424236 -----  
EPI\_ISL\_424238 -----  
EPI\_ISL\_424248 -----  
EPI\_ISL\_424254 -----  
EPI\_ISL\_425548 -----  
EPI\_ISL\_425581 -----  
EPI\_ISL\_426881 -----  
EPI\_ISL\_426883 -----  
EPI\_ISL\_426888 -----  
EPI\_ISL\_426900 -----  
EPI\_ISL\_426901 -----  
EPI\_ISL\_426903 -----  
EPI\_ISL\_426904 -----  
EPI\_ISL\_426907 -----  
EPI\_ISL\_426910 -----

ORF1ab 6481 NTVYTKVDGVDVELFENKTTLPVNVAFELWAKRNIKPVPEVKILNNLGVDIAANTVIWDY  
EPI\_ISL\_413575 -----  
EPI\_ISL\_413588 -----  
EPI\_ISL\_413589 -----  
EPI\_ISL\_424221 -----  
EPI\_ISL\_424233 -----  
EPI\_ISL\_424236 -----  
EPI\_ISL\_424238 -----  
EPI\_ISL\_424248 -----  
EPI\_ISL\_424254 -----  
EPI\_ISL\_425548 -----  
EPI\_ISL\_425581 -----  
EPI\_ISL\_426881 -----  
EPI\_ISL\_426883 -----  
EPI\_ISL\_426888 -----  
EPI\_ISL\_426900 -----  
EPI\_ISL\_426901 -----  
EPI\_ISL\_426903 -----  
EPI\_ISL\_426904 -----  
EPI\_ISL\_426907 -----  
EPI\_ISL\_426910 -----  
ORF1ab 6481 NTVYTKVDGVDVELFENKTTLPVNVAFELWAKRNIKPVPEVKILNNLGVDIAANTVIWDY  
EPI\_ISL\_413575 -----  
EPI\_ISL\_413588 -----  
EPI\_ISL\_413589 -----  
EPI\_ISL\_424221 -----  
EPI\_ISL\_424233 -----  
EPI\_ISL\_424236 -----  
EPI\_ISL\_424238 -----  
EPI\_ISL\_424248 -----  
EPI\_ISL\_424254 -----  
EPI\_ISL\_425548 -----  
EPI\_ISL\_425581 -----  
EPI\_ISL\_426881 -----  
EPI\_ISL\_426883 -----  
EPI\_ISL\_426888 -----  
EPI\_ISL\_426900 -----  
EPI\_ISL\_426901 -----  
EPI\_ISL\_426903 -----  
EPI\_ISL\_426904 -----  
EPI\_ISL\_426907 -----  
EPI\_ISL\_426910 -----

```
ORF1ab          6541 KRDAHAHISTIGVCSMTDIAKKPTETICAPLTVFFDGRVDGQVDLFRNARNGVLIITEGSV
EPI_ISL_413575 -----
EPI_ISL_413588 -----
EPI_ISL_413589 -----
EPI_ISL_424221 -----
EPI_ISL_424233 -----
EPI_ISL_424236 -----
EPI_ISL_424238 -----
EPI_ISL_424248 -----
EPI_ISL_424254 -----
EPI_ISL_425548 -----
EPI_ISL_425581 -----
EPI_ISL_426881 -----
EPI_ISL_426883 -----
EPI_ISL_426888 -----
EPI_ISL_426900 -----
EPI_ISL_426901 -----
EPI_ISL_426903 -----
EPI_ISL_426904 -----
EPI_ISL_426907 -----
EPI_ISL_426910 -----
ORF1ab          6541 KRDAHAHISTIGVCSMTDIAKKPTETICAPLTVFFDGRVDGQVDLFRNARNGVLIITEGSV
EPI_ISL_413575 -----
EPI_ISL_413588 -----
EPI_ISL_413589 -----
EPI_ISL_424221 -----
EPI_ISL_424233 -----
EPI_ISL_424236 -----
EPI_ISL_424238 -----
EPI_ISL_424248 -----
EPI_ISL_424254 -----
EPI_ISL_425548 -----
EPI_ISL_425581 -----
EPI_ISL_426881 -----
EPI_ISL_426883 -----
EPI_ISL_426888 -----
EPI_ISL_426900 -----
EPI_ISL_426901 -----
EPI_ISL_426903 -----
EPI_ISL_426904 -----
EPI_ISL_426907 -----
EPI_ISL_426910 -----
```

ORF1ab 6601 KGLQPSVGPKQASLNGVTLIGEAVKTQFNYYKKVDGTVVQQLPETYFTQSRNLQEFKPRSQ  
EPI\_ISL\_413575 -----  
EPI\_ISL\_413588 -----  
EPI\_ISL\_413589 -----  
EPI\_ISL\_424221 -----  
EPI\_ISL\_424233 -----  
EPI\_ISL\_424236 -----  
EPI\_ISL\_424238 -----  
EPI\_ISL\_424248 -----  
EPI\_ISL\_424254 -----  
EPI\_ISL\_425548 -----  
EPI\_ISL\_425581 -----  
EPI\_ISL\_426881 -----  
EPI\_ISL\_426883 -----  
EPI\_ISL\_426888 -----  
EPI\_ISL\_426900 -----  
EPI\_ISL\_426901 -----  
EPI\_ISL\_426903 -----  
EPI\_ISL\_426904 -----  
EPI\_ISL\_426907 -----  
EPI\_ISL\_426910 -----  
ORF1ab 6601 KGLQPSVGPKQASLNGVTLIGEAVKTQFNYYKKVDGTVVQQLPETYFTQSRNLQEFKPRSQ  
EPI\_ISL\_413575 -----  
EPI\_ISL\_413588 -----  
EPI\_ISL\_413589 -----  
EPI\_ISL\_424221 -----  
EPI\_ISL\_424233 -----  
EPI\_ISL\_424236 -----  
EPI\_ISL\_424238 -----  
EPI\_ISL\_424248 -----  
EPI\_ISL\_424254 -----  
EPI\_ISL\_425548 -----  
EPI\_ISL\_425581 -----  
EPI\_ISL\_426881 -----  
EPI\_ISL\_426883 -----  
EPI\_ISL\_426888 -----  
EPI\_ISL\_426900 -----  
EPI\_ISL\_426901 -----  
EPI\_ISL\_426903 -----  
EPI\_ISL\_426904 -----  
EPI\_ISL\_426907 -----  
EPI\_ISL\_426910 -----

ORF1ab 6661 MEIDFLELAMDEFIERYKLEGYAFEHIVYGDFSHSQLGGLHLLIGLAKRFKESPFEELEDF  
EPI\_ISL\_413575 -----  
EPI\_ISL\_413588 -----  
EPI\_ISL\_413589 -----  
EPI\_ISL\_424221 -----  
EPI\_ISL\_424233 -----  
EPI\_ISL\_424236 -----  
EPI\_ISL\_424238 -----  
EPI\_ISL\_424248 -----  
EPI\_ISL\_424254 -----  
EPI\_ISL\_425548 -----  
EPI\_ISL\_425581 -----  
EPI\_ISL\_426881 -----  
EPI\_ISL\_426883 -----  
EPI\_ISL\_426888 -----  
EPI\_ISL\_426900 -----  
EPI\_ISL\_426901 -----  
EPI\_ISL\_426903 -----  
EPI\_ISL\_426904 -----  
EPI\_ISL\_426907 -----  
EPI\_ISL\_426910 -----  
ORF1ab 6661 MEIDFLELAMDEFIERYKLEGYAFEHIVYGDFSHSQLGGLHLLIGLAKRFKESPFEELEDF  
EPI\_ISL\_413575 -----  
EPI\_ISL\_413588 -----  
EPI\_ISL\_413589 -----  
EPI\_ISL\_424221 -----  
EPI\_ISL\_424233 -----  
EPI\_ISL\_424236 -----  
EPI\_ISL\_424238 -----  
EPI\_ISL\_424248 -----  
EPI\_ISL\_424254 -----  
EPI\_ISL\_425548 -----  
EPI\_ISL\_425581 -----  
EPI\_ISL\_426881 -----  
EPI\_ISL\_426883 -----  
EPI\_ISL\_426888 -----  
EPI\_ISL\_426900 -----  
EPI\_ISL\_426901 -----  
EPI\_ISL\_426903 -----  
EPI\_ISL\_426904 -----  
EPI\_ISL\_426907 -----  
EPI\_ISL\_426910 -----



ORF1ab 6721 IPMDSTVKNYFITDAQTGSSKCVCSVIDLLLLDDFVEI IKSQDLSVVSQVVKVTIDYTEIS  
EPI\_ISL\_413575 -----  
EPI\_ISL\_413588 -----  
EPI\_ISL\_413589 -----  
EPI\_ISL\_424221 -----  
EPI\_ISL\_424233 -----  
EPI\_ISL\_424236 -----  
EPI\_ISL\_424238 -----  
EPI\_ISL\_424248 -----  
EPI\_ISL\_424254 -----  
EPI\_ISL\_425548 -----  
EPI\_ISL\_425581 -----  
EPI\_ISL\_426881 -----  
EPI\_ISL\_426883 -----  
EPI\_ISL\_426888 -----  
EPI\_ISL\_426900 -----  
EPI\_ISL\_426901 -----  
EPI\_ISL\_426903 -----  
EPI\_ISL\_426904 -----  
EPI\_ISL\_426907 -----  
EPI\_ISL\_426910 -----  
ORF1ab 6721 IPMDSTVKNYFITDAQTGSSKCVCSVIDLLLLDDFVEI IKSQDLSVVSQVVKVTIDYTEIS  
EPI\_ISL\_413575 -----  
EPI\_ISL\_413588 -----  
EPI\_ISL\_413589 -----  
EPI\_ISL\_424221 -----  
EPI\_ISL\_424233 -----  
EPI\_ISL\_424236 -----  
EPI\_ISL\_424238 -----  
EPI\_ISL\_424248 -----  
EPI\_ISL\_424254 -----  
EPI\_ISL\_425548 -----  
EPI\_ISL\_425581 -----  
EPI\_ISL\_426881 -----  
EPI\_ISL\_426883 -----  
EPI\_ISL\_426888 -----  
EPI\_ISL\_426900 -----  
EPI\_ISL\_426901 -----  
EPI\_ISL\_426903 -----  
EPI\_ISL\_426904 -----  
EPI\_ISL\_426907 -----  
EPI\_ISL\_426910 -----

ORF1ab 6781 FMLWCKDGHVETFYPKLQSSQAWQPGVAMPNLYKMQRMLLEKCDLQNYGDSATLPKGIMM  
EPI\_ISL\_413575 -----  
EPI\_ISL\_413588 -----  
EPI\_ISL\_413589 -----  
EPI\_ISL\_424221 -----  
EPI\_ISL\_424233 -----  
EPI\_ISL\_424236 -----  
EPI\_ISL\_424238 -----  
EPI\_ISL\_424248 -----  
EPI\_ISL\_424254 -----  
EPI\_ISL\_425548 -----  
EPI\_ISL\_425581 -----  
EPI\_ISL\_426881 -----  
EPI\_ISL\_426883 -----  
EPI\_ISL\_426888 -----  
EPI\_ISL\_426900 -----  
EPI\_ISL\_426901 -----  
EPI\_ISL\_426903 -----  
EPI\_ISL\_426904 -----  
EPI\_ISL\_426907 -----  
EPI\_ISL\_426910 -----  
ORF1ab 6781 FMLWCKDGHVETFYPKLQSSQAWQPGVAMPNLYKMQRMLLEKCDLQNYGDSATLPKGIMM  
EPI\_ISL\_413575 -----  
EPI\_ISL\_413588 -----  
EPI\_ISL\_413589 -----  
EPI\_ISL\_424221 -----  
EPI\_ISL\_424233 -----  
EPI\_ISL\_424236 -----  
EPI\_ISL\_424238 -----  
EPI\_ISL\_424248 -----  
EPI\_ISL\_424254 -----  
EPI\_ISL\_425548 -----  
EPI\_ISL\_425581 -----  
EPI\_ISL\_426881 -----  
EPI\_ISL\_426883 -----  
EPI\_ISL\_426888 -----  
EPI\_ISL\_426900 -----  
EPI\_ISL\_426901 -----  
EPI\_ISL\_426903 -----  
EPI\_ISL\_426904 -----  
EPI\_ISL\_426907 -----  
EPI\_ISL\_426910 -----

ORF1ab 6841 NVAKYTQLCQYLNTLTLAVPYNMRVIHFGAGSDKGVAPGTAVLRQWLPTGTLVDSDLND  
EPI\_ISL\_413575 -----  
EPI\_ISL\_413588 -----  
EPI\_ISL\_413589 -----  
EPI\_ISL\_424221 -----  
EPI\_ISL\_424233 -----  
EPI\_ISL\_424236 -----  
EPI\_ISL\_424238 -----  
EPI\_ISL\_424248 -----  
EPI\_ISL\_424254 -----  
EPI\_ISL\_425548 -----  
EPI\_ISL\_425581 -----  
EPI\_ISL\_426881 -----  
EPI\_ISL\_426883 -----  
EPI\_ISL\_426888 -----  
EPI\_ISL\_426900 -----  
EPI\_ISL\_426901 -----  
EPI\_ISL\_426903 -----  
EPI\_ISL\_426904 -----  
EPI\_ISL\_426907 -----  
EPI\_ISL\_426910 -----  
ORF1ab 6841 NVAKYTQLCQYLNTLTLAVPYNMRVIHFGAGSDKGVAPGTAVLRQWLPTGTLVDSDLND  
EPI\_ISL\_413575 -----  
EPI\_ISL\_413588 -----  
EPI\_ISL\_413589 -----  
EPI\_ISL\_424221 -----  
EPI\_ISL\_424233 -----  
EPI\_ISL\_424236 -----  
EPI\_ISL\_424238 -----  
EPI\_ISL\_424248 -----  
EPI\_ISL\_424254 -----  
EPI\_ISL\_425548 -----  
EPI\_ISL\_425581 -----  
EPI\_ISL\_426881 -----  
EPI\_ISL\_426883 -----  
EPI\_ISL\_426888 -----  
EPI\_ISL\_426900 -----  
EPI\_ISL\_426901 -----  
EPI\_ISL\_426903 -----  
EPI\_ISL\_426904 -----  
EPI\_ISL\_426907 -----  
EPI\_ISL\_426910 -----

ORF1ab 6901 FVSDADSTLIGDCATVHTANKWDLIIISDMYDPKTKNVTKENDSKEGFFTYICGFIQQKLA  
EPI\_ISL\_413575 -----  
EPI\_ISL\_413588 -----  
EPI\_ISL\_413589 -----  
EPI\_ISL\_424221 -----  
EPI\_ISL\_424233 -----  
EPI\_ISL\_424236 -----  
EPI\_ISL\_424238 -----  
EPI\_ISL\_424248 -----  
EPI\_ISL\_424254 -----  
EPI\_ISL\_425548 -----  
EPI\_ISL\_425581 -----  
EPI\_ISL\_426881 -----  
EPI\_ISL\_426883 -----  
EPI\_ISL\_426888 -----  
EPI\_ISL\_426900 -----  
EPI\_ISL\_426901 -----  
EPI\_ISL\_426903 -----  
EPI\_ISL\_426904 -----  
EPI\_ISL\_426907 -----  
EPI\_ISL\_426910 -----  
ORF1ab 6901 FVSDADSTLIGDCATVHTANKWDLIIISDMYDPKTKNVTKENDSKEGFFTYICGFIQQKLA  
EPI\_ISL\_413575 -----  
EPI\_ISL\_413588 -----  
EPI\_ISL\_413589 -----  
EPI\_ISL\_424221 -----  
EPI\_ISL\_424233 -----  
EPI\_ISL\_424236 -----  
EPI\_ISL\_424238 -----  
EPI\_ISL\_424248 -----  
EPI\_ISL\_424254 -----  
EPI\_ISL\_425548 -----  
EPI\_ISL\_425581 -----  
EPI\_ISL\_426881 -----  
EPI\_ISL\_426883 -----  
EPI\_ISL\_426888 -----  
EPI\_ISL\_426900 -----  
EPI\_ISL\_426901 -----  
EPI\_ISL\_426903 -----  
EPI\_ISL\_426904 -----  
EPI\_ISL\_426907 -----  
EPI\_ISL\_426910 -----

ORF1ab 6961 LGGSSVAIKITEHSWNADLYKLMGHFAWWTAFVTNVNASSSEAFLLIGCNLYLGKPREQIDGY  
EPI\_ISL\_413575 -----  
EPI\_ISL\_413588 -----  
EPI\_ISL\_413589 -----  
EPI\_ISL\_424221 -----  
EPI\_ISL\_424233 -----  
EPI\_ISL\_424236 -----  
EPI\_ISL\_424238 -----  
EPI\_ISL\_424248 -----  
EPI\_ISL\_424254 -----  
EPI\_ISL\_425548 -----  
EPI\_ISL\_425581 -----  
EPI\_ISL\_426881 -----  
EPI\_ISL\_426883 -----  
EPI\_ISL\_426888 -----  
EPI\_ISL\_426900 -----  
EPI\_ISL\_426901 -----  
EPI\_ISL\_426903 -----  
EPI\_ISL\_426904 -----  
EPI\_ISL\_426907 -----  
EPI\_ISL\_426910 -----  
ORF1ab 6961 LGGSSVAIKITEHSWNADLYKLMGHFAWWTAFVTNVNASSSEAFLLIGCNLYLGKPREQIDGY  
EPI\_ISL\_413575 -----  
EPI\_ISL\_413588 -----  
EPI\_ISL\_413589 -----  
EPI\_ISL\_424221 -----  
EPI\_ISL\_424233 -----  
EPI\_ISL\_424236 -----  
EPI\_ISL\_424238 -----  
EPI\_ISL\_424248 -----  
EPI\_ISL\_424254 -----  
EPI\_ISL\_425548 -----  
EPI\_ISL\_425581 -----  
EPI\_ISL\_426881 -----  
EPI\_ISL\_426883 -----  
EPI\_ISL\_426888 -----  
EPI\_ISL\_426900 -----  
EPI\_ISL\_426901 -----  
EPI\_ISL\_426903 -----  
EPI\_ISL\_426904 -----  
EPI\_ISL\_426907 -----  
EPI\_ISL\_426910 -----

```
ORF1ab          7021 VMHANYIFWRNTNPIQLSSYSLFDMSEKFLKLRGTAVMSLKEGQINDMILSLLSKGRLII
EPI_ISL_413575 -----
EPI_ISL_413588 -----
EPI_ISL_413589 -----
EPI_ISL_424221 -----
EPI_ISL_424233 -----
EPI_ISL_424236 -----
EPI_ISL_424238 -----
EPI_ISL_424248 -----
EPI_ISL_424254 -----
EPI_ISL_425548 -----
EPI_ISL_425581 -----
EPI_ISL_426881 -----
EPI_ISL_426883 -----
EPI_ISL_426888 -----
EPI_ISL_426900 -----
EPI_ISL_426901 -----
EPI_ISL_426903 -----
EPI_ISL_426904 -----
EPI_ISL_426907 -----
EPI_ISL_426910 -----
ORF1ab          7021 VMHANYIFWRNTNPIQLSSYSLFDMSEKFLKLRGTAVMSLKEGQINDMILSLLSKGRLII
EPI_ISL_413575 -----
EPI_ISL_413588 -----
EPI_ISL_413589 -----
EPI_ISL_424221 -----
EPI_ISL_424233 -----
EPI_ISL_424236 -----
EPI_ISL_424238 -----
EPI_ISL_424248 -----
EPI_ISL_424254 -----
EPI_ISL_425548 -----
EPI_ISL_425581 -----
EPI_ISL_426881 -----
EPI_ISL_426883 -----
EPI_ISL_426888 -----
EPI_ISL_426900 -----
EPI_ISL_426901 -----
EPI_ISL_426903 -----
EPI_ISL_426904 -----
EPI_ISL_426907 -----
EPI_ISL_426910 -----
```

|                |      |                  |
|----------------|------|------------------|
| ORFlab         | 7081 | RENNRVVISSDVLVNN |
| EPI_ISL_413575 |      | -----            |
| EPI_ISL_413588 |      | -----            |
| EPI_ISL_413589 |      | -----            |
| EPI_ISL_424221 |      | -----            |
| EPI_ISL_424233 |      | -----            |
| EPI_ISL_424236 |      | -----            |
| EPI_ISL_424238 |      | -----            |
| EPI_ISL_424248 |      | -----            |
| EPI_ISL_424254 |      | -----            |
| EPI_ISL_425548 |      | -----            |
| EPI_ISL_425581 |      | -----            |
| EPI_ISL_426881 |      | -----            |
| EPI_ISL_426883 |      | -----            |
| EPI_ISL_426888 |      | -----            |
| EPI_ISL_426900 |      | -----            |
| EPI_ISL_426901 |      | -----            |
| EPI_ISL_426903 |      | -----            |
| EPI_ISL_426904 |      | -----            |
| EPI_ISL_426907 |      | -----            |
| EPI_ISL_426910 |      | -----            |
| ORFlab         | 7081 | RENNRVVISSDVLVNN |
| EPI_ISL_413575 |      | -----            |
| EPI_ISL_413588 |      | -----            |
| EPI_ISL_413589 |      | -----            |
| EPI_ISL_424221 |      | -----            |
| EPI_ISL_424233 |      | -----            |
| EPI_ISL_424236 |      | -----            |
| EPI_ISL_424238 |      | -----            |
| EPI_ISL_424248 |      | -----            |
| EPI_ISL_424254 |      | -----            |
| EPI_ISL_425548 |      | -----            |
| EPI_ISL_425581 |      | -----            |
| EPI_ISL_426881 |      | -----            |
| EPI_ISL_426883 |      | -----            |
| EPI_ISL_426888 |      | -----            |
| EPI_ISL_426900 |      | -----            |
| EPI_ISL_426901 |      | -----            |
| EPI_ISL_426903 |      | -----            |
| EPI_ISL_426904 |      | -----            |
| EPI_ISL_426907 |      | -----            |
| EPI_ISL_426910 |      | -----            |





# Clade GH

```
ORF1ab 1 MESLVPGFNEKTHVQLSLPVLQVRDVLVRGFGDSVEEV LSEARQHLKDGTCGLVEVEKGV
EPI_ISL_413575 1 -----
EPI_ISL_413588 1 -----
EPI_ISL_413589 1 -----
EPI_ISL_424221 1 -----
EPI_ISL_424233 1 -----
EPI_ISL_424236 1 -----
EPI_ISL_424238 1 -----
EPI_ISL_424248 1 -----
EPI_ISL_424254 1 -----
EPI_ISL_425548 1 -----
EPI_ISL_425581 1 -----
EPI_ISL_426881 1 -----
EPI_ISL_426883 1 -----
EPI_ISL_426888 1 -----
EPI_ISL_426900 1 -----
EPI_ISL_426901 1 -----
EPI_ISL_426903 1 -----
EPI_ISL_426904 1 -----
EPI_ISL_426907 1 -----
EPI_ISL_426910 1 -----
ORF1ab 1 MESLVPGFNEKTHVQLSLPVLQVRDVLVRGFGDSVEEV LSEARQHLKDGTCGLVEVEKGV
EPI_ISL_413575 1 -----
EPI_ISL_413588 1 -----
EPI_ISL_413589 1 -----
EPI_ISL_424221 1 -----
EPI_ISL_424233 1 -----
EPI_ISL_424236 1 -----
EPI_ISL_424238 1 -----
EPI_ISL_424248 1 -----
EPI_ISL_424254 1 -----
EPI_ISL_425548 1 -----
EPI_ISL_425581 1 -----
EPI_ISL_426881 1 -----
EPI_ISL_426883 1 -----
EPI_ISL_426888 1 -----
EPI_ISL_426900 1 -----
EPI_ISL_426901 1 -----
EPI_ISL_426903 1 -----
EPI_ISL_426904 1 -----
EPI_ISL_426907 1 -----
EPI_ISL_426910 1 -----
```

|                |    |                                                               |
|----------------|----|---------------------------------------------------------------|
| ORF1ab         | 61 | LPQLEQPYVFIKRS DARTAPHGHVMVELVAELEGIQYGRSGETLGVLVPHVGEIPVAYRK |
| EPI_ISL_413575 | 1  | -----                                                         |
| EPI_ISL_413588 | 1  | -----                                                         |
| EPI_ISL_413589 | 1  | -----                                                         |
| EPI_ISL_424221 | 1  | -----                                                         |
| EPI_ISL_424233 | 1  | -----                                                         |
| EPI_ISL_424236 | 1  | -----                                                         |
| EPI_ISL_424238 | 1  | -----                                                         |
| EPI_ISL_424248 | 1  | -----                                                         |
| EPI_ISL_424254 | 1  | -----                                                         |
| EPI_ISL_425548 | 1  | -----                                                         |
| EPI_ISL_425581 | 1  | -----                                                         |
| EPI_ISL_426881 | 1  | -----                                                         |
| EPI_ISL_426883 | 1  | -----                                                         |
| EPI_ISL_426888 | 1  | -----                                                         |
| EPI_ISL_426900 | 1  | -----                                                         |
| EPI_ISL_426901 | 1  | -----                                                         |
| EPI_ISL_426903 | 1  | -----                                                         |
| EPI_ISL_426904 | 1  | -----                                                         |
| EPI_ISL_426907 | 1  | -----                                                         |
| EPI_ISL_426910 | 1  | -----                                                         |
| ORF1ab         | 61 | LPQLEQPYVFIKRS DARTAPHGHVMVELVAELEGIQYGRSGETLGVLVPHVGEIPVAYRK |
| EPI_ISL_413575 | 1  | -----                                                         |
| EPI_ISL_413588 | 1  | -----                                                         |
| EPI_ISL_413589 | 1  | -----                                                         |
| EPI_ISL_424221 | 1  | -----                                                         |
| EPI_ISL_424233 | 1  | -----                                                         |
| EPI_ISL_424236 | 1  | -----                                                         |
| EPI_ISL_424238 | 1  | -----                                                         |
| EPI_ISL_424248 | 1  | -----                                                         |
| EPI_ISL_424254 | 1  | -----                                                         |
| EPI_ISL_425548 | 1  | -----                                                         |
| EPI_ISL_425581 | 1  | -----                                                         |
| EPI_ISL_426881 | 1  | -----                                                         |
| EPI_ISL_426883 | 1  | -----                                                         |
| EPI_ISL_426888 | 1  | -----                                                         |
| EPI_ISL_426900 | 1  | -----                                                         |
| EPI_ISL_426901 | 1  | -----                                                         |
| EPI_ISL_426903 | 1  | -----                                                         |
| EPI_ISL_426904 | 1  | -----                                                         |
| EPI_ISL_426907 | 1  | -----                                                         |
| EPI_ISL_426910 | 1  | -----                                                         |

```
ORF1ab 121 VLLRKNGNKGAGGHSYGADLKSFDLGDELGTDPYEDFQENWNTKHSSGVTRELMRELNGG
EPI_ISL_413575 1 -----
EPI_ISL_413588 1 -----
EPI_ISL_413589 1 -----
EPI_ISL_424221 1 -----
EPI_ISL_424233 1 -----
EPI_ISL_424236 1 -----
EPI_ISL_424238 1 -----
EPI_ISL_424248 1 -----
EPI_ISL_424254 1 -----
EPI_ISL_425548 1 -----
EPI_ISL_425581 1 -----
EPI_ISL_426881 1 -----
EPI_ISL_426883 1 -----
EPI_ISL_426888 1 -----
EPI_ISL_426900 1 -----
EPI_ISL_426901 1 -----
EPI_ISL_426903 1 -----
EPI_ISL_426904 1 -----
EPI_ISL_426907 1 -----
EPI_ISL_426910 1 -----
ORF1ab 121 VLLRKNGNKGAGGHSYGADLKSFDLGDELGTDPYEDFQENWNTKHSSGVTRELMRELNGG
EPI_ISL_413575 1 -----
EPI_ISL_413588 1 -----
EPI_ISL_413589 1 -----
EPI_ISL_424221 1 -----
EPI_ISL_424233 1 -----
EPI_ISL_424236 1 -----
EPI_ISL_424238 1 -----
EPI_ISL_424248 1 -----
EPI_ISL_424254 1 -----
EPI_ISL_425548 1 -----
EPI_ISL_425581 1 -----
EPI_ISL_426881 1 -----
EPI_ISL_426883 1 -----
EPI_ISL_426888 1 -----
EPI_ISL_426900 1 -----
EPI_ISL_426901 1 -----
EPI_ISL_426903 1 -----
EPI_ISL_426904 1 -----
EPI_ISL_426907 1 -----
EPI_ISL_426910 1 -----
```

|                |     |                                                              |
|----------------|-----|--------------------------------------------------------------|
| ORF1ab         | 181 | AYTRYVDNNFCGPDGYPLECIKDLLARAGKASCTLSEQLDFIDTKRGVYCCREHEHEIAW |
| EPI_ISL_413575 | 1   | -----                                                        |
| EPI_ISL_413588 | 1   | -----                                                        |
| EPI_ISL_413589 | 1   | -----                                                        |
| EPI_ISL_424221 | 1   | -----                                                        |
| EPI_ISL_424233 | 1   | -----                                                        |
| EPI_ISL_424236 | 1   | -----                                                        |
| EPI_ISL_424238 | 1   | -----                                                        |
| EPI_ISL_424248 | 1   | -----                                                        |
| EPI_ISL_424254 | 1   | -----                                                        |
| EPI_ISL_425548 | 1   | -----                                                        |
| EPI_ISL_425581 | 1   | -----                                                        |
| EPI_ISL_426881 | 1   | -----                                                        |
| EPI_ISL_426883 | 1   | -----                                                        |
| EPI_ISL_426888 | 1   | -----                                                        |
| EPI_ISL_426900 | 1   | -----                                                        |
| EPI_ISL_426901 | 1   | -----                                                        |
| EPI_ISL_426903 | 1   | -----                                                        |
| EPI_ISL_426904 | 1   | -----                                                        |
| EPI_ISL_426907 | 1   | -----                                                        |
| EPI_ISL_426910 | 1   | -----                                                        |
| ORF1ab         | 181 | AYTRYVDNNFCGPDGYPLECIKDLLARAGKASCTLSEQLDFIDTKRGVYCCREHEHEIAW |
| EPI_ISL_413575 | 1   | -----                                                        |
| EPI_ISL_413588 | 1   | -----                                                        |
| EPI_ISL_413589 | 1   | -----                                                        |
| EPI_ISL_424221 | 1   | -----                                                        |
| EPI_ISL_424233 | 1   | -----                                                        |
| EPI_ISL_424236 | 1   | -----                                                        |
| EPI_ISL_424238 | 1   | -----                                                        |
| EPI_ISL_424248 | 1   | -----                                                        |
| EPI_ISL_424254 | 1   | -----                                                        |
| EPI_ISL_425548 | 1   | -----                                                        |
| EPI_ISL_425581 | 1   | -----                                                        |
| EPI_ISL_426881 | 1   | -----                                                        |
| EPI_ISL_426883 | 1   | -----                                                        |
| EPI_ISL_426888 | 1   | -----                                                        |
| EPI_ISL_426900 | 1   | -----                                                        |
| EPI_ISL_426901 | 1   | -----                                                        |
| EPI_ISL_426903 | 1   | -----                                                        |
| EPI_ISL_426904 | 1   | -----                                                        |
| EPI_ISL_426907 | 1   | -----                                                        |
| EPI_ISL_426910 | 1   | -----                                                        |

|                |     |                                                               |
|----------------|-----|---------------------------------------------------------------|
| ORF1ab         | 241 | YTERSEKSYELQTPFEIKLAKKFDTFNGECPNFVFPPLNSIIKTIQPRVEKKKLDGFMGRI |
| EPI_ISL_413575 | 1   | -----                                                         |
| EPI_ISL_413588 | 1   | -----                                                         |
| EPI_ISL_413589 | 1   | -----                                                         |
| EPI_ISL_424221 | 1   | -----                                                         |
| EPI_ISL_424233 | 1   | -----                                                         |
| EPI_ISL_424236 | 1   | -----                                                         |
| EPI_ISL_424238 | 1   | -----                                                         |
| EPI_ISL_424248 | 1   | -----                                                         |
| EPI_ISL_424254 | 1   | -----                                                         |
| EPI_ISL_425548 | 1   | -----                                                         |
| EPI_ISL_425581 | 1   | -----                                                         |
| EPI_ISL_426881 | 1   | -----                                                         |
| EPI_ISL_426883 | 1   | -----                                                         |
| EPI_ISL_426888 | 1   | -----                                                         |
| EPI_ISL_426900 | 1   | -----                                                         |
| EPI_ISL_426901 | 1   | -----                                                         |
| EPI_ISL_426903 | 1   | -----                                                         |
| EPI_ISL_426904 | 1   | -----                                                         |
| EPI_ISL_426907 | 1   | -----                                                         |
| EPI_ISL_426910 | 1   | -----                                                         |
| ORF1ab         | 241 | YTERSEKSYELQTPFEIKLAKKFDTFNGECPNFVFPPLNSIIKTIQPRVEKKKLDGFMGRI |
| EPI_ISL_413575 | 1   | -----                                                         |
| EPI_ISL_413588 | 1   | -----                                                         |
| EPI_ISL_413589 | 1   | -----                                                         |
| EPI_ISL_424221 | 1   | -----                                                         |
| EPI_ISL_424233 | 1   | -----                                                         |
| EPI_ISL_424236 | 1   | -----                                                         |
| EPI_ISL_424238 | 1   | -----                                                         |
| EPI_ISL_424248 | 1   | -----                                                         |
| EPI_ISL_424254 | 1   | -----                                                         |
| EPI_ISL_425548 | 1   | -----                                                         |
| EPI_ISL_425581 | 1   | -----                                                         |
| EPI_ISL_426881 | 1   | -----                                                         |
| EPI_ISL_426883 | 1   | -----                                                         |
| EPI_ISL_426888 | 1   | -----                                                         |
| EPI_ISL_426900 | 1   | -----                                                         |
| EPI_ISL_426901 | 1   | -----                                                         |
| EPI_ISL_426903 | 1   | -----                                                         |
| EPI_ISL_426904 | 1   | -----                                                         |
| EPI_ISL_426907 | 1   | -----                                                         |
| EPI_ISL_426910 | 1   | -----                                                         |

```
ORF1ab 301 RSVYPVASPNECNQMCLSTLMKCDHCGETSWQTDGDFVKATCEFCGTENLTKEGATTCGYL
EPI_ISL_413575 1 -----
EPI_ISL_413588 1 -----
EPI_ISL_413589 1 -----
EPI_ISL_424221 1 -----
EPI_ISL_424233 1 -----
EPI_ISL_424236 1 -----
EPI_ISL_424238 1 -----
EPI_ISL_424248 1 -----
EPI_ISL_424254 1 -----
EPI_ISL_425548 1 -----
EPI_ISL_425581 1 -----
EPI_ISL_426881 1 -----
EPI_ISL_426883 1 -----
EPI_ISL_426888 1 -----
EPI_ISL_426900 1 -----
EPI_ISL_426901 1 -----
EPI_ISL_426903 1 -----
EPI_ISL_426904 1 -----
EPI_ISL_426907 1 -----
EPI_ISL_426910 1 -----
ORF1ab 301 RSVYPVASPNECNQMCLSTLMKCDHCGETSWQTDGDFVKATCEFCGTENLTKEGATTCGYL
EPI_ISL_413575 1 -----
EPI_ISL_413588 1 -----
EPI_ISL_413589 1 -----
EPI_ISL_424221 1 -----
EPI_ISL_424233 1 -----
EPI_ISL_424236 1 -----
EPI_ISL_424238 1 -----
EPI_ISL_424248 1 -----
EPI_ISL_424254 1 -----
EPI_ISL_425548 1 -----
EPI_ISL_425581 1 -----
EPI_ISL_426881 1 -----
EPI_ISL_426883 1 -----
EPI_ISL_426888 1 -----
EPI_ISL_426900 1 -----
EPI_ISL_426901 1 -----
EPI_ISL_426903 1 -----
EPI_ISL_426904 1 -----
EPI_ISL_426907 1 -----
EPI_ISL_426910 1 -----
```

|                |     |                                                                 |
|----------------|-----|-----------------------------------------------------------------|
| ORF1ab         | 361 | PQNAVVKIYCPACHNSEVGPESHSLAEYHNESGLKTILRKGGRRTIAFGGCVFSYVVGCHNKC |
| EPI_ISL_413575 | 1   | -----                                                           |
| EPI_ISL_413588 | 1   | -----                                                           |
| EPI_ISL_413589 | 1   | -----                                                           |
| EPI_ISL_424221 | 1   | -----                                                           |
| EPI_ISL_424233 | 1   | -----                                                           |
| EPI_ISL_424236 | 1   | -----                                                           |
| EPI_ISL_424238 | 1   | -----                                                           |
| EPI_ISL_424248 | 1   | -----                                                           |
| EPI_ISL_424254 | 1   | -----                                                           |
| EPI_ISL_425548 | 1   | -----                                                           |
| EPI_ISL_425581 | 1   | -----                                                           |
| EPI_ISL_426881 | 1   | -----                                                           |
| EPI_ISL_426883 | 1   | -----                                                           |
| EPI_ISL_426888 | 1   | -----                                                           |
| EPI_ISL_426900 | 1   | -----                                                           |
| EPI_ISL_426901 | 1   | -----                                                           |
| EPI_ISL_426903 | 1   | -----                                                           |
| EPI_ISL_426904 | 1   | -----                                                           |
| EPI_ISL_426907 | 1   | -----                                                           |
| EPI_ISL_426910 | 1   | -----                                                           |
| ORF1ab         | 361 | PQNAVVKIYCPACHNSEVGPESHSLAEYHNESGLKTILRKGGRRTIAFGGCVFSYVVGCHNKC |
| EPI_ISL_413575 | 1   | -----                                                           |
| EPI_ISL_413588 | 1   | -----                                                           |
| EPI_ISL_413589 | 1   | -----                                                           |
| EPI_ISL_424221 | 1   | -----                                                           |
| EPI_ISL_424233 | 1   | -----                                                           |
| EPI_ISL_424236 | 1   | -----                                                           |
| EPI_ISL_424238 | 1   | -----                                                           |
| EPI_ISL_424248 | 1   | -----                                                           |
| EPI_ISL_424254 | 1   | -----                                                           |
| EPI_ISL_425548 | 1   | -----                                                           |
| EPI_ISL_425581 | 1   | -----                                                           |
| EPI_ISL_426881 | 1   | -----                                                           |
| EPI_ISL_426883 | 1   | -----                                                           |
| EPI_ISL_426888 | 1   | -----                                                           |
| EPI_ISL_426900 | 1   | -----                                                           |
| EPI_ISL_426901 | 1   | -----                                                           |
| EPI_ISL_426903 | 1   | -----                                                           |
| EPI_ISL_426904 | 1   | -----                                                           |
| EPI_ISL_426907 | 1   | -----                                                           |
| EPI_ISL_426910 | 1   | -----                                                           |

```
ORF1ab 421 AYWVPRASANIGCNHTGVVGESEGLNDNLLEILQKEKVNINIVGDFKLNEEIAIILASF
EPI_ISL_413575 1 -----
EPI_ISL_413588 1 -----
EPI_ISL_413589 1 -----
EPI_ISL_424221 1 -----
EPI_ISL_424233 1 -----
EPI_ISL_424236 1 -----
EPI_ISL_424238 1 -----
EPI_ISL_424248 1 -----
EPI_ISL_424254 1 -----
EPI_ISL_425548 1 -----
EPI_ISL_425581 1 -----
EPI_ISL_426881 1 -----
EPI_ISL_426883 1 -----
EPI_ISL_426888 1 -----
EPI_ISL_426900 1 -----
EPI_ISL_426901 1 -----
EPI_ISL_426903 1 -----
EPI_ISL_426904 1 -----
EPI_ISL_426907 1 -----
EPI_ISL_426910 1 -----
ORF1ab 421 AYWVPRASANIGCNHTGVVGESEGLNDNLLEILQKEKVNINIVGDFKLNEEIAIILASF
EPI_ISL_413575 1 -----
EPI_ISL_413588 1 -----
EPI_ISL_413589 1 -----
EPI_ISL_424221 1 -----
EPI_ISL_424233 1 -----
EPI_ISL_424236 1 -----
EPI_ISL_424238 1 -----
EPI_ISL_424248 1 -----
EPI_ISL_424254 1 -----
EPI_ISL_425548 1 -----
EPI_ISL_425581 1 -----
EPI_ISL_426881 1 -----
EPI_ISL_426883 1 -----
EPI_ISL_426888 1 -----
EPI_ISL_426900 1 -----
EPI_ISL_426901 1 -----
EPI_ISL_426903 1 -----
EPI_ISL_426904 1 -----
EPI_ISL_426907 1 -----
EPI_ISL_426910 1 -----
```



|                |     |                                                              |
|----------------|-----|--------------------------------------------------------------|
| ORF1ab         | 481 | SASTSAFVETVKGLDYKAFKQIVESCGNFKVTKGKAKKGAWNIGEQKSILSPLYAFASEA |
| EPI_ISL_413575 | 1   | -----                                                        |
| EPI_ISL_413588 | 1   | -----                                                        |
| EPI_ISL_413589 | 1   | -----                                                        |
| EPI_ISL_424221 | 1   | -----                                                        |
| EPI_ISL_424233 | 1   | -----                                                        |
| EPI_ISL_424236 | 1   | -----                                                        |
| EPI_ISL_424238 | 1   | -----                                                        |
| EPI_ISL_424248 | 1   | -----                                                        |
| EPI_ISL_424254 | 1   | -----                                                        |
| EPI_ISL_425548 | 1   | -----                                                        |
| EPI_ISL_425581 | 1   | -----                                                        |
| EPI_ISL_426881 | 1   | -----                                                        |
| EPI_ISL_426883 | 1   | -----                                                        |
| EPI_ISL_426888 | 1   | -----                                                        |
| EPI_ISL_426900 | 1   | -----                                                        |
| EPI_ISL_426901 | 1   | -----                                                        |
| EPI_ISL_426903 | 1   | -----                                                        |
| EPI_ISL_426904 | 1   | -----                                                        |
| EPI_ISL_426907 | 1   | -----                                                        |
| EPI_ISL_426910 | 1   | -----                                                        |
| ORF1ab         | 481 | SASTSAFVETVKGLDYKAFKQIVESCGNFKVTKGKAKKGAWNIGEQKSILSPLYAFASEA |
| EPI_ISL_413575 | 1   | -----                                                        |
| EPI_ISL_413588 | 1   | -----                                                        |
| EPI_ISL_413589 | 1   | -----                                                        |
| EPI_ISL_424221 | 1   | -----                                                        |
| EPI_ISL_424233 | 1   | -----                                                        |
| EPI_ISL_424236 | 1   | -----                                                        |
| EPI_ISL_424238 | 1   | -----                                                        |
| EPI_ISL_424248 | 1   | -----                                                        |
| EPI_ISL_424254 | 1   | -----                                                        |
| EPI_ISL_425548 | 1   | -----                                                        |
| EPI_ISL_425581 | 1   | -----                                                        |
| EPI_ISL_426881 | 1   | -----                                                        |
| EPI_ISL_426883 | 1   | -----                                                        |
| EPI_ISL_426888 | 1   | -----                                                        |
| EPI_ISL_426900 | 1   | -----                                                        |
| EPI_ISL_426901 | 1   | -----                                                        |
| EPI_ISL_426903 | 1   | -----                                                        |
| EPI_ISL_426904 | 1   | -----                                                        |
| EPI_ISL_426907 | 1   | -----                                                        |
| EPI_ISL_426910 | 1   | -----                                                        |

|                |     |                                                              |
|----------------|-----|--------------------------------------------------------------|
| ORF1ab         | 541 | ARVVRSIFSRTLETAQNSVRVLQKAAITILDGISQYSLRLIDAMMFTSDLATNNLVVMAY |
| EPI_ISL_413575 | 1   | -----                                                        |
| EPI_ISL_413588 | 1   | -----                                                        |
| EPI_ISL_413589 | 1   | -----                                                        |
| EPI_ISL_424221 | 1   | -----                                                        |
| EPI_ISL_424233 | 1   | -----                                                        |
| EPI_ISL_424236 | 1   | -----                                                        |
| EPI_ISL_424238 | 1   | -----                                                        |
| EPI_ISL_424248 | 1   | -----                                                        |
| EPI_ISL_424254 | 1   | -----                                                        |
| EPI_ISL_425548 | 1   | -----                                                        |
| EPI_ISL_425581 | 1   | -----                                                        |
| EPI_ISL_426881 | 1   | -----                                                        |
| EPI_ISL_426883 | 1   | -----                                                        |
| EPI_ISL_426888 | 1   | -----                                                        |
| EPI_ISL_426900 | 1   | -----                                                        |
| EPI_ISL_426901 | 1   | -----                                                        |
| EPI_ISL_426903 | 1   | -----                                                        |
| EPI_ISL_426904 | 1   | -----                                                        |
| EPI_ISL_426907 | 1   | -----                                                        |
| EPI_ISL_426910 | 1   | -----                                                        |
| ORF1ab         | 541 | ARVVRSIFSRTLETAQNSVRVLQKAAITILDGISQYSLRLIDAMMFTSDLATNNLVVMAY |
| EPI_ISL_413575 | 1   | -----                                                        |
| EPI_ISL_413588 | 1   | -----                                                        |
| EPI_ISL_413589 | 1   | -----                                                        |
| EPI_ISL_424221 | 1   | -----                                                        |
| EPI_ISL_424233 | 1   | -----                                                        |
| EPI_ISL_424236 | 1   | -----                                                        |
| EPI_ISL_424238 | 1   | -----                                                        |
| EPI_ISL_424248 | 1   | -----                                                        |
| EPI_ISL_424254 | 1   | -----                                                        |
| EPI_ISL_425548 | 1   | -----                                                        |
| EPI_ISL_425581 | 1   | -----                                                        |
| EPI_ISL_426881 | 1   | -----                                                        |
| EPI_ISL_426883 | 1   | -----                                                        |
| EPI_ISL_426888 | 1   | -----                                                        |
| EPI_ISL_426900 | 1   | -----                                                        |
| EPI_ISL_426901 | 1   | -----                                                        |
| EPI_ISL_426903 | 1   | -----                                                        |
| EPI_ISL_426904 | 1   | -----                                                        |
| EPI_ISL_426907 | 1   | -----                                                        |
| EPI_ISL_426910 | 1   | -----                                                        |

```
ORF1ab 601 ITGGVVQLTSQWLTNIFGTVYEKLPVLDWLEEKFKEGVEFLRDGWEIVKFISTCACEIV
EPI_ISL_413575 1 -----
EPI_ISL_413588 1 -----
EPI_ISL_413589 1 -----
EPI_ISL_424221 1 -----
EPI_ISL_424233 1 -----
EPI_ISL_424236 1 -----
EPI_ISL_424238 1 -----
EPI_ISL_424248 1 -----
EPI_ISL_424254 1 -----
EPI_ISL_425548 1 -----
EPI_ISL_425581 1 -----
EPI_ISL_426881 1 -----
EPI_ISL_426883 1 -----
EPI_ISL_426888 1 -----
EPI_ISL_426900 1 -----
EPI_ISL_426901 1 -----
EPI_ISL_426903 1 -----
EPI_ISL_426904 1 -----
EPI_ISL_426907 1 -----
EPI_ISL_426910 1 -----
ORF1ab 601 ITGGVVQLTSQWLTNIFGTVYEKLPVLDWLEEKFKEGVEFLRDGWEIVKFISTCACEIV
EPI_ISL_413575 1 -----
EPI_ISL_413588 1 -----
EPI_ISL_413589 1 -----
EPI_ISL_424221 1 -----
EPI_ISL_424233 1 -----
EPI_ISL_424236 1 -----
EPI_ISL_424238 1 -----
EPI_ISL_424248 1 -----
EPI_ISL_424254 1 -----
EPI_ISL_425548 1 -----
EPI_ISL_425581 1 -----
EPI_ISL_426881 1 -----
EPI_ISL_426883 1 -----
EPI_ISL_426888 1 -----
EPI_ISL_426900 1 -----
EPI_ISL_426901 1 -----
EPI_ISL_426903 1 -----
EPI_ISL_426904 1 -----
EPI_ISL_426907 1 -----
EPI_ISL_426910 1 -----
```

|                |     |                                                               |
|----------------|-----|---------------------------------------------------------------|
| ORF1ab         | 661 | GGQIVTCAKEIKESVQTFFFKLVNKFLALCADSIIIGGAKLKALNLGETFVTHSKGLYRKC |
| EPI_ISL_413575 | 1   | -----                                                         |
| EPI_ISL_413588 | 1   | -----                                                         |
| EPI_ISL_413589 | 1   | -----                                                         |
| EPI_ISL_424221 | 1   | -----                                                         |
| EPI_ISL_424233 | 1   | -----                                                         |
| EPI_ISL_424236 | 1   | -----                                                         |
| EPI_ISL_424238 | 1   | -----                                                         |
| EPI_ISL_424248 | 1   | -----                                                         |
| EPI_ISL_424254 | 1   | -----                                                         |
| EPI_ISL_425548 | 1   | -----                                                         |
| EPI_ISL_425581 | 1   | -----                                                         |
| EPI_ISL_426881 | 1   | -----                                                         |
| EPI_ISL_426883 | 1   | -----                                                         |
| EPI_ISL_426888 | 1   | -----                                                         |
| EPI_ISL_426900 | 1   | -----                                                         |
| EPI_ISL_426901 | 1   | -----                                                         |
| EPI_ISL_426903 | 1   | -----                                                         |
| EPI_ISL_426904 | 1   | -----                                                         |
| EPI_ISL_426907 | 1   | -----                                                         |
| EPI_ISL_426910 | 1   | -----                                                         |
| ORF1ab         | 661 | GGQIVTCAKEIKESVQTFFFKLVNKFLALCADSIIIGGAKLKALNLGETFVTHSKGLYRKC |
| EPI_ISL_413575 | 1   | -----                                                         |
| EPI_ISL_413588 | 1   | -----                                                         |
| EPI_ISL_413589 | 1   | -----                                                         |
| EPI_ISL_424221 | 1   | -----                                                         |
| EPI_ISL_424233 | 1   | -----                                                         |
| EPI_ISL_424236 | 1   | -----                                                         |
| EPI_ISL_424238 | 1   | -----                                                         |
| EPI_ISL_424248 | 1   | -----                                                         |
| EPI_ISL_424254 | 1   | -----                                                         |
| EPI_ISL_425548 | 1   | -----                                                         |
| EPI_ISL_425581 | 1   | -----                                                         |
| EPI_ISL_426881 | 1   | -----                                                         |
| EPI_ISL_426883 | 1   | -----                                                         |
| EPI_ISL_426888 | 1   | -----                                                         |
| EPI_ISL_426900 | 1   | -----                                                         |
| EPI_ISL_426901 | 1   | -----                                                         |
| EPI_ISL_426903 | 1   | -----                                                         |
| EPI_ISL_426904 | 1   | -----                                                         |
| EPI_ISL_426907 | 1   | -----                                                         |
| EPI_ISL_426910 | 1   | -----                                                         |

|                |     |                                                              |
|----------------|-----|--------------------------------------------------------------|
| ORF1ab         | 721 | VKSREETGLLMPLKAPKEIIFLEGETLPTEVLTEEVVLKTGDLQPLEQPTSEAVEAPLVG |
| EPI_ISL_413575 | 1   | -----                                                        |
| EPI_ISL_413588 | 1   | -----                                                        |
| EPI_ISL_413589 | 1   | -----                                                        |
| EPI_ISL_424221 | 1   | -----                                                        |
| EPI_ISL_424233 | 1   | -----                                                        |
| EPI_ISL_424236 | 1   | -----                                                        |
| EPI_ISL_424238 | 1   | -----                                                        |
| EPI_ISL_424248 | 1   | -----                                                        |
| EPI_ISL_424254 | 1   | -----                                                        |
| EPI_ISL_425548 | 1   | -----                                                        |
| EPI_ISL_425581 | 1   | -----                                                        |
| EPI_ISL_426881 | 1   | -----                                                        |
| EPI_ISL_426883 | 1   | -----                                                        |
| EPI_ISL_426888 | 1   | -----                                                        |
| EPI_ISL_426900 | 1   | -----                                                        |
| EPI_ISL_426901 | 1   | -----                                                        |
| EPI_ISL_426903 | 1   | -----                                                        |
| EPI_ISL_426904 | 1   | -----                                                        |
| EPI_ISL_426907 | 1   | -----                                                        |
| EPI_ISL_426910 | 1   | -----                                                        |
| ORF1ab         | 721 | VKSREETGLLMPLKAPKEIIFLEGETLPTEVLTEEVVLKTGDLQPLEQPTSEAVEAPLVG |
| EPI_ISL_413575 | 1   | -----                                                        |
| EPI_ISL_413588 | 1   | -----                                                        |
| EPI_ISL_413589 | 1   | -----                                                        |
| EPI_ISL_424221 | 1   | -----                                                        |
| EPI_ISL_424233 | 1   | -----                                                        |
| EPI_ISL_424236 | 1   | -----                                                        |
| EPI_ISL_424238 | 1   | -----                                                        |
| EPI_ISL_424248 | 1   | -----                                                        |
| EPI_ISL_424254 | 1   | -----                                                        |
| EPI_ISL_425548 | 1   | -----                                                        |
| EPI_ISL_425581 | 1   | -----                                                        |
| EPI_ISL_426881 | 1   | -----                                                        |
| EPI_ISL_426883 | 1   | -----                                                        |
| EPI_ISL_426888 | 1   | -----                                                        |
| EPI_ISL_426900 | 1   | -----                                                        |
| EPI_ISL_426901 | 1   | -----                                                        |
| EPI_ISL_426903 | 1   | -----                                                        |
| EPI_ISL_426904 | 1   | -----                                                        |
| EPI_ISL_426907 | 1   | -----                                                        |
| EPI_ISL_426910 | 1   | -----                                                        |

|                |     |                                       |                        |
|----------------|-----|---------------------------------------|------------------------|
| ORF1ab         | 781 | TPVCINGLMLLEIKDTEKYCALAPNMMVTNNTFTLKG | APTKVTFGDDTVIEVQGYKSVN |
| EPI_ISL_413575 | 1   | -----                                 | APTKVTFGDDTVIEVQGYKSVN |
| EPI_ISL_413588 | 1   | -----                                 | APTKVTFGDDTVIEVQGYKSVN |
| EPI_ISL_413589 | 1   | -----                                 | APTKVTFGDDTVIEVQGYKSVN |
| EPI_ISL_424221 | 1   | -----                                 | APTKVTFGDDTVIEVQGYKSVN |
| EPI_ISL_424233 | 1   | -----                                 | APTKVTFGDDTVIEVQGYKSVN |
| EPI_ISL_424236 | 1   | -----                                 | APTKVTFGDDTVIEVQGYKSVN |
| EPI_ISL_424238 | 1   | -----                                 | APTKVTFGDDTVIEVQGYKSVN |
| EPI_ISL_424248 | 1   | -----                                 | APTKVTFGDDTVIEVQGYKSVN |
| EPI_ISL_424254 | 1   | -----                                 | APTKVTFGDDTVIEVQGYKSVN |
| EPI_ISL_425548 | 1   | -----                                 | APTKVTFGDDTVIEVQGYKSVN |
| EPI_ISL_425581 | 1   | -----                                 | APTKVTFGDDTVIEVQGYKSVN |
| EPI_ISL_426881 | 1   | -----                                 | APTKVTFGDDTVIEVQGYKSVN |
| EPI_ISL_426883 | 1   | -----                                 | APTKVTFGDDTVIEVQGYKSVN |
| EPI_ISL_426888 | 1   | -----                                 | APTKVTFGDDTVIEVQGYKSVN |
| EPI_ISL_426900 | 1   | -----                                 | APTKVTFGDDTVIEVQGYKSVN |
| EPI_ISL_426901 | 1   | -----                                 | APTKVTFGDDTVIEVQGYKSVN |
| EPI_ISL_426903 | 1   | -----                                 | APTKVTFGDDTVIEVQGYKSVN |
| EPI_ISL_426904 | 1   | -----                                 | APTKVTFGDDTVIEVQGYKSVN |
| EPI_ISL_426907 | 1   | -----                                 | APTKVTFGDDTVIEVQGYKSVN |
| EPI_ISL_426910 | 1   | -----                                 | APTKVTFGDDTVIEVQGYKSVN |
| ORF1ab         | 781 | TPVCINGLMLLEIKDTEKYCALAPNMMVTNNTFTLKG | APTKVTFGDDTVIEVQGYKSVN |
| EPI_ISL_413575 | 1   | -----                                 | APTKVTFGDDTVIEVQGYKSVN |
| EPI_ISL_413588 | 1   | -----                                 | APTKVTFGDDTVIEVQGYKSVN |
| EPI_ISL_413589 | 1   | -----                                 | APTKVTFGDDTVIEVQGYKSVN |
| EPI_ISL_424221 | 1   | -----                                 | APTKVTFGDDTVIEVQGYKSVN |
| EPI_ISL_424233 | 1   | -----                                 | APTKVTFGDDTVIEVQGYKSVN |
| EPI_ISL_424236 | 1   | -----                                 | APTKVTFGDDTVIEVQGYKSVN |
| EPI_ISL_424238 | 1   | -----                                 | APTKVTFGDDTVIEVQGYKSVN |
| EPI_ISL_424248 | 1   | -----                                 | APTKVTFGDDTVIEVQGYKSVN |
| EPI_ISL_424254 | 1   | -----                                 | APTKVTFGDDTVIEVQGYKSVN |
| EPI_ISL_425548 | 1   | -----                                 | APTKVTFGDDTVIEVQGYKSVN |
| EPI_ISL_425581 | 1   | -----                                 | APTKVTFGDDTVIEVQGYKSVN |
| EPI_ISL_426881 | 1   | -----                                 | APTKVTFGDDTVIEVQGYKSVN |
| EPI_ISL_426883 | 1   | -----                                 | APTKVTFGDDTVIEVQGYKSVN |
| EPI_ISL_426888 | 1   | -----                                 | APTKVTFGDDTVIEVQGYKSVN |
| EPI_ISL_426900 | 1   | -----                                 | APTKVTFGDDTVIEVQGYKSVN |
| EPI_ISL_426901 | 1   | -----                                 | APTKVTFGDDTVIEVQGYKSVN |
| EPI_ISL_426903 | 1   | -----                                 | APTKVTFGDDTVIEVQGYKSVN |
| EPI_ISL_426904 | 1   | -----                                 | APTKVTFGDDTVIEVQGYKSVN |
| EPI_ISL_426907 | 1   | -----                                 | APTKVTFGDDTVIEVQGYKSVN |
| EPI_ISL_426910 | 1   | -----                                 | APTKVTFGDDTVIEVQGYKSVN |









































































|                |      |     |                                                           |
|----------------|------|-----|-----------------------------------------------------------|
| ORFlab         | 2761 | KGG | KIVNNWLKQLIKVTLVFLFVAAIFYLITPVHVMSKHTDFSSEIIGYKAIDGGVTRDI |
| EPI_ISL_413575 | 1943 | KGG | -----                                                     |
| EPI_ISL_413588 | 1943 | KGG | -----                                                     |
| EPI_ISL_413589 | 1943 | KGG | -----                                                     |
| EPI_ISL_424221 | 1943 | KGG | -----                                                     |
| EPI_ISL_424233 | 1943 | KGG | -----                                                     |
| EPI_ISL_424236 | 1943 | KGG | -----                                                     |
| EPI_ISL_424238 | 1943 | KGG | -----                                                     |
| EPI_ISL_424248 | 1943 | KGG | -----                                                     |
| EPI_ISL_424254 | 1943 | KGG | -----                                                     |
| EPI_ISL_425548 | 1943 | KGG | -----                                                     |
| EPI_ISL_425581 | 1943 | KGG | -----                                                     |
| EPI_ISL_426881 | 1943 | KGG | -----                                                     |
| EPI_ISL_426883 | 1943 | KGG | -----                                                     |
| EPI_ISL_426888 | 1943 | KGG | -----                                                     |
| EPI_ISL_426900 | 1943 | KGG | -----                                                     |
| EPI_ISL_426901 | 1943 | KGG | -----                                                     |
| EPI_ISL_426903 | 1943 | KGG | -----                                                     |
| EPI_ISL_426904 | 1943 | KGG | -----                                                     |
| EPI_ISL_426907 | 1943 | KGG | -----                                                     |
| EPI_ISL_426910 | 1943 | KGG | -----                                                     |
| ORFlab         | 2761 | KGG | KIVNNWLKQLIKVTLVFLFVAAIFYLITPVHVMSKHTDFSSEIIGYKAIDGGVTRDI |
| EPI_ISL_413575 | 1943 | KGG | -----                                                     |
| EPI_ISL_413588 | 1943 | KGG | -----                                                     |
| EPI_ISL_413589 | 1943 | KGG | -----                                                     |
| EPI_ISL_424221 | 1943 | KGG | -----                                                     |
| EPI_ISL_424233 | 1943 | KGG | -----                                                     |
| EPI_ISL_424236 | 1943 | KGG | -----                                                     |
| EPI_ISL_424238 | 1943 | KGG | -----                                                     |
| EPI_ISL_424248 | 1943 | KGG | -----                                                     |
| EPI_ISL_424254 | 1943 | KGG | -----                                                     |
| EPI_ISL_425548 | 1943 | KGG | -----                                                     |
| EPI_ISL_425581 | 1943 | KGG | -----                                                     |
| EPI_ISL_426881 | 1943 | KGG | -----                                                     |
| EPI_ISL_426883 | 1943 | KGG | -----                                                     |
| EPI_ISL_426888 | 1943 | KGG | -----                                                     |
| EPI_ISL_426900 | 1943 | KGG | -----                                                     |
| EPI_ISL_426901 | 1943 | KGG | -----                                                     |
| EPI_ISL_426903 | 1943 | KGG | -----                                                     |
| EPI_ISL_426904 | 1943 | KGG | -----                                                     |
| EPI_ISL_426907 | 1943 | KGG | -----                                                     |
| EPI_ISL_426910 | 1943 | KGG | -----                                                     |

ORF1ab 2821 ASTDTCFANKHADFDTWFSQRGGSYTNDKACPLIAAVITREVG FVVPGLPGTILRTTNGD  
EPI\_ISL\_413575 -----  
EPI\_ISL\_413588 -----  
EPI\_ISL\_413589 -----  
EPI\_ISL\_424221 -----  
EPI\_ISL\_424233 -----  
EPI\_ISL\_424236 -----  
EPI\_ISL\_424238 -----  
EPI\_ISL\_424248 -----  
EPI\_ISL\_424254 -----  
EPI\_ISL\_425548 -----  
EPI\_ISL\_425581 -----  
EPI\_ISL\_426881 -----  
EPI\_ISL\_426883 -----  
EPI\_ISL\_426888 -----  
EPI\_ISL\_426900 -----  
EPI\_ISL\_426901 -----  
EPI\_ISL\_426903 -----  
EPI\_ISL\_426904 -----  
EPI\_ISL\_426907 -----  
EPI\_ISL\_426910 -----  
ORF1ab 2821 ASTDTCFANKHADFDTWFSQRGGSYTNDKACPLIAAVITREVG FVVPGLPGTILRTTNGD  
EPI\_ISL\_413575 -----  
EPI\_ISL\_413588 -----  
EPI\_ISL\_413589 -----  
EPI\_ISL\_424221 -----  
EPI\_ISL\_424233 -----  
EPI\_ISL\_424236 -----  
EPI\_ISL\_424238 -----  
EPI\_ISL\_424248 -----  
EPI\_ISL\_424254 -----  
EPI\_ISL\_425548 -----  
EPI\_ISL\_425581 -----  
EPI\_ISL\_426881 -----  
EPI\_ISL\_426883 -----  
EPI\_ISL\_426888 -----  
EPI\_ISL\_426900 -----  
EPI\_ISL\_426901 -----  
EPI\_ISL\_426903 -----  
EPI\_ISL\_426904 -----  
EPI\_ISL\_426907 -----  
EPI\_ISL\_426910 -----



ORF1ab 2881 FLHFLPRVFSAVGNICYTPSKLIEYTD FATSACVLAAECTIFK DASGKVPVPCYDTNVLE  
EPI\_ISL\_413575 -----  
EPI\_ISL\_413588 -----  
EPI\_ISL\_413589 -----  
EPI\_ISL\_424221 -----  
EPI\_ISL\_424233 -----  
EPI\_ISL\_424236 -----  
EPI\_ISL\_424238 -----  
EPI\_ISL\_424248 -----  
EPI\_ISL\_424254 -----  
EPI\_ISL\_425548 -----  
EPI\_ISL\_425581 -----  
EPI\_ISL\_426881 -----  
EPI\_ISL\_426883 -----  
EPI\_ISL\_426888 -----  
EPI\_ISL\_426900 -----  
EPI\_ISL\_426901 -----  
EPI\_ISL\_426903 -----  
EPI\_ISL\_426904 -----  
EPI\_ISL\_426907 -----  
EPI\_ISL\_426910 -----  
ORF1ab 2881 FLHFLPRVFSAVGNICYTPSKLIEYTD FATSACVLAAECTIFK DASGKVPVPCYDTNVLE  
EPI\_ISL\_413575 -----  
EPI\_ISL\_413588 -----  
EPI\_ISL\_413589 -----  
EPI\_ISL\_424221 -----  
EPI\_ISL\_424233 -----  
EPI\_ISL\_424236 -----  
EPI\_ISL\_424238 -----  
EPI\_ISL\_424248 -----  
EPI\_ISL\_424254 -----  
EPI\_ISL\_425548 -----  
EPI\_ISL\_425581 -----  
EPI\_ISL\_426881 -----  
EPI\_ISL\_426883 -----  
EPI\_ISL\_426888 -----  
EPI\_ISL\_426900 -----  
EPI\_ISL\_426901 -----  
EPI\_ISL\_426903 -----  
EPI\_ISL\_426904 -----  
EPI\_ISL\_426907 -----  
EPI\_ISL\_426910 -----

ORF1ab 2941 GSVAYESLRPDTRYVLM DGSIIQFPNTYLEG SVRVVTTFDSEYCRHGT CERSEAGVCVST  
EPI\_ISL\_413575 -----  
EPI\_ISL\_413588 -----  
EPI\_ISL\_413589 -----  
EPI\_ISL\_424221 -----  
EPI\_ISL\_424233 -----  
EPI\_ISL\_424236 -----  
EPI\_ISL\_424238 -----  
EPI\_ISL\_424248 -----  
EPI\_ISL\_424254 -----  
EPI\_ISL\_425548 -----  
EPI\_ISL\_425581 -----  
EPI\_ISL\_426881 -----  
EPI\_ISL\_426883 -----  
EPI\_ISL\_426888 -----  
EPI\_ISL\_426900 -----  
EPI\_ISL\_426901 -----  
EPI\_ISL\_426903 -----  
EPI\_ISL\_426904 -----  
EPI\_ISL\_426907 -----  
EPI\_ISL\_426910 -----  
ORF1ab 2941 GSVAYESLRPDTRYVLM DGSIIQFPNTYLEG SVRVVTTFDSEYCRHGT CERSEAGVCVST  
EPI\_ISL\_413575 -----  
EPI\_ISL\_413588 -----  
EPI\_ISL\_413589 -----  
EPI\_ISL\_424221 -----  
EPI\_ISL\_424233 -----  
EPI\_ISL\_424236 -----  
EPI\_ISL\_424238 -----  
EPI\_ISL\_424248 -----  
EPI\_ISL\_424254 -----  
EPI\_ISL\_425548 -----  
EPI\_ISL\_425581 -----  
EPI\_ISL\_426881 -----  
EPI\_ISL\_426883 -----  
EPI\_ISL\_426888 -----  
EPI\_ISL\_426900 -----  
EPI\_ISL\_426901 -----  
EPI\_ISL\_426903 -----  
EPI\_ISL\_426904 -----  
EPI\_ISL\_426907 -----  
EPI\_ISL\_426910 -----

```
ORF1ab          3001 SGRWVLNNDYYRSLPGVFCGVDAVNLLTNMFTPLIQPIGALDISASIVAGGIVAIIVVTCL
EPI_ISL_413575 -----
EPI_ISL_413588 -----
EPI_ISL_413589 -----
EPI_ISL_424221 -----
EPI_ISL_424233 -----
EPI_ISL_424236 -----
EPI_ISL_424238 -----
EPI_ISL_424248 -----
EPI_ISL_424254 -----
EPI_ISL_425548 -----
EPI_ISL_425581 -----
EPI_ISL_426881 -----
EPI_ISL_426883 -----
EPI_ISL_426888 -----
EPI_ISL_426900 -----
EPI_ISL_426901 -----
EPI_ISL_426903 -----
EPI_ISL_426904 -----
EPI_ISL_426907 -----
EPI_ISL_426910 -----
ORF1ab          3001 SGRWVLNNDYYRSLPGVFCGVDAVNLLTNMFTPLIQPIGALDISASIVAGGIVAIIVVTCL
EPI_ISL_413575 -----
EPI_ISL_413588 -----
EPI_ISL_413589 -----
EPI_ISL_424221 -----
EPI_ISL_424233 -----
EPI_ISL_424236 -----
EPI_ISL_424238 -----
EPI_ISL_424248 -----
EPI_ISL_424254 -----
EPI_ISL_425548 -----
EPI_ISL_425581 -----
EPI_ISL_426881 -----
EPI_ISL_426883 -----
EPI_ISL_426888 -----
EPI_ISL_426900 -----
EPI_ISL_426901 -----
EPI_ISL_426903 -----
EPI_ISL_426904 -----
EPI_ISL_426907 -----
EPI_ISL_426910 -----
```

ORF1ab 3061 AYYFMRFRRAFGEYSHVVAFNNTLLFLMSFTVLCLTPVYSFLPGVYSVIYLYLTFYLTNDV  
EPI\_ISL\_413575 -----  
EPI\_ISL\_413588 -----  
EPI\_ISL\_413589 -----  
EPI\_ISL\_424221 -----  
EPI\_ISL\_424233 -----  
EPI\_ISL\_424236 -----  
EPI\_ISL\_424238 -----  
EPI\_ISL\_424248 -----  
EPI\_ISL\_424254 -----  
EPI\_ISL\_425548 -----  
EPI\_ISL\_425581 -----  
EPI\_ISL\_426881 -----  
EPI\_ISL\_426883 -----  
EPI\_ISL\_426888 -----  
EPI\_ISL\_426900 -----  
EPI\_ISL\_426901 -----  
EPI\_ISL\_426903 -----  
EPI\_ISL\_426904 -----  
EPI\_ISL\_426907 -----  
EPI\_ISL\_426910 -----  
ORF1ab 3061 AYYFMRFRRAFGEYSHVVAFNNTLLFLMSFTVLCLTPVYSFLPGVYSVIYLYLTFYLTNDV  
EPI\_ISL\_413575 -----  
EPI\_ISL\_413588 -----  
EPI\_ISL\_413589 -----  
EPI\_ISL\_424221 -----  
EPI\_ISL\_424233 -----  
EPI\_ISL\_424236 -----  
EPI\_ISL\_424238 -----  
EPI\_ISL\_424248 -----  
EPI\_ISL\_424254 -----  
EPI\_ISL\_425548 -----  
EPI\_ISL\_425581 -----  
EPI\_ISL\_426881 -----  
EPI\_ISL\_426883 -----  
EPI\_ISL\_426888 -----  
EPI\_ISL\_426900 -----  
EPI\_ISL\_426901 -----  
EPI\_ISL\_426903 -----  
EPI\_ISL\_426904 -----  
EPI\_ISL\_426907 -----  
EPI\_ISL\_426910 -----

ORF1ab 3121 SFLAHIQWMVMFTPLVPFWITIAIYIICISTKHFYWFFSNYLRKRVVFNGVSFSTFEEAAL  
EPI\_ISL\_413575 -----  
EPI\_ISL\_413588 -----  
EPI\_ISL\_413589 -----  
EPI\_ISL\_424221 -----  
EPI\_ISL\_424233 -----  
EPI\_ISL\_424236 -----  
EPI\_ISL\_424238 -----  
EPI\_ISL\_424248 -----  
EPI\_ISL\_424254 -----  
EPI\_ISL\_425548 -----  
EPI\_ISL\_425581 -----  
EPI\_ISL\_426881 -----  
EPI\_ISL\_426883 -----  
EPI\_ISL\_426888 -----  
EPI\_ISL\_426900 -----  
EPI\_ISL\_426901 -----  
EPI\_ISL\_426903 -----  
EPI\_ISL\_426904 -----  
EPI\_ISL\_426907 -----  
EPI\_ISL\_426910 -----  
ORF1ab 3121 SFLAHIQWMVMFTPLVPFWITIAIYIICISTKHFYWFFSNYLRKRVVFNGVSFSTFEEAAL  
EPI\_ISL\_413575 -----  
EPI\_ISL\_413588 -----  
EPI\_ISL\_413589 -----  
EPI\_ISL\_424221 -----  
EPI\_ISL\_424233 -----  
EPI\_ISL\_424236 -----  
EPI\_ISL\_424238 -----  
EPI\_ISL\_424248 -----  
EPI\_ISL\_424254 -----  
EPI\_ISL\_425548 -----  
EPI\_ISL\_425581 -----  
EPI\_ISL\_426881 -----  
EPI\_ISL\_426883 -----  
EPI\_ISL\_426888 -----  
EPI\_ISL\_426900 -----  
EPI\_ISL\_426901 -----  
EPI\_ISL\_426903 -----  
EPI\_ISL\_426904 -----  
EPI\_ISL\_426907 -----  
EPI\_ISL\_426910 -----

```
ORF1ab          3181 CTFLLNKEMYLKLRSDVLLPLTQYNRYLALYNKYKYFSGAMDTTSYREAACCHLAKALND
EPI_ISL_413575 -----
EPI_ISL_413588 -----
EPI_ISL_413589 -----
EPI_ISL_424221 -----
EPI_ISL_424233 -----
EPI_ISL_424236 -----
EPI_ISL_424238 -----
EPI_ISL_424248 -----
EPI_ISL_424254 -----
EPI_ISL_425548 -----
EPI_ISL_425581 -----
EPI_ISL_426881 -----
EPI_ISL_426883 -----
EPI_ISL_426888 -----
EPI_ISL_426900 -----
EPI_ISL_426901 -----
EPI_ISL_426903 -----
EPI_ISL_426904 -----
EPI_ISL_426907 -----
EPI_ISL_426910 -----
ORF1ab          3181 CTFLLNKEMYLKLRSDVLLPLTQYNRYLALYNKYKYFSGAMDTTSYREAACCHLAKALND
EPI_ISL_413575 -----
EPI_ISL_413588 -----
EPI_ISL_413589 -----
EPI_ISL_424221 -----
EPI_ISL_424233 -----
EPI_ISL_424236 -----
EPI_ISL_424238 -----
EPI_ISL_424248 -----
EPI_ISL_424254 -----
EPI_ISL_425548 -----
EPI_ISL_425581 -----
EPI_ISL_426881 -----
EPI_ISL_426883 -----
EPI_ISL_426888 -----
EPI_ISL_426900 -----
EPI_ISL_426901 -----
EPI_ISL_426903 -----
EPI_ISL_426904 -----
EPI_ISL_426907 -----
EPI_ISL_426910 -----
```

ORF1ab 3241 FSNSGSDVLYQPPQTSITSAVLQSGFRKMAFPSGKVEGCMVQVTCGTTTTLNGLWLDDVVY  
EPI\_ISL\_413575 -----  
EPI\_ISL\_413588 -----  
EPI\_ISL\_413589 -----  
EPI\_ISL\_424221 -----  
EPI\_ISL\_424233 -----  
EPI\_ISL\_424236 -----  
EPI\_ISL\_424238 -----  
EPI\_ISL\_424248 -----  
EPI\_ISL\_424254 -----  
EPI\_ISL\_425548 -----  
EPI\_ISL\_425581 -----  
EPI\_ISL\_426881 -----  
EPI\_ISL\_426883 -----  
EPI\_ISL\_426888 -----  
EPI\_ISL\_426900 -----  
EPI\_ISL\_426901 -----  
EPI\_ISL\_426903 -----  
EPI\_ISL\_426904 -----  
EPI\_ISL\_426907 -----  
EPI\_ISL\_426910 -----  
ORF1ab 3241 FSNSGSDVLYQPPQTSITSAVLQSGFRKMAFPSGKVEGCMVQVTCGTTTTLNGLWLDDVVY  
EPI\_ISL\_413575 -----  
EPI\_ISL\_413588 -----  
EPI\_ISL\_413589 -----  
EPI\_ISL\_424221 -----  
EPI\_ISL\_424233 -----  
EPI\_ISL\_424236 -----  
EPI\_ISL\_424238 -----  
EPI\_ISL\_424248 -----  
EPI\_ISL\_424254 -----  
EPI\_ISL\_425548 -----  
EPI\_ISL\_425581 -----  
EPI\_ISL\_426881 -----  
EPI\_ISL\_426883 -----  
EPI\_ISL\_426888 -----  
EPI\_ISL\_426900 -----  
EPI\_ISL\_426901 -----  
EPI\_ISL\_426903 -----  
EPI\_ISL\_426904 -----  
EPI\_ISL\_426907 -----  
EPI\_ISL\_426910 -----

ORF1ab 3301 CPRHVICTSEDMLNPNYEDLLIRKSNHNFLVQAGNVQLRVIGHSMQNCVCLKKVDTANPK  
EPI\_ISL\_413575 -----  
EPI\_ISL\_413588 -----  
EPI\_ISL\_413589 -----  
EPI\_ISL\_424221 -----  
EPI\_ISL\_424233 -----  
EPI\_ISL\_424236 -----  
EPI\_ISL\_424238 -----  
EPI\_ISL\_424248 -----  
EPI\_ISL\_424254 -----  
EPI\_ISL\_425548 -----  
EPI\_ISL\_425581 -----  
EPI\_ISL\_426881 -----  
EPI\_ISL\_426883 -----  
EPI\_ISL\_426888 -----  
EPI\_ISL\_426900 -----  
EPI\_ISL\_426901 -----  
EPI\_ISL\_426903 -----  
EPI\_ISL\_426904 -----  
EPI\_ISL\_426907 -----  
EPI\_ISL\_426910 -----  
ORF1ab 3301 CPRHVICTSEDMLNPNYEDLLIRKSNHNFLVQAGNVQLRVIGHSMQNCVCLKKVDTANPK  
EPI\_ISL\_413575 -----  
EPI\_ISL\_413588 -----  
EPI\_ISL\_413589 -----  
EPI\_ISL\_424221 -----  
EPI\_ISL\_424233 -----  
EPI\_ISL\_424236 -----  
EPI\_ISL\_424238 -----  
EPI\_ISL\_424248 -----  
EPI\_ISL\_424254 -----  
EPI\_ISL\_425548 -----  
EPI\_ISL\_425581 -----  
EPI\_ISL\_426881 -----  
EPI\_ISL\_426883 -----  
EPI\_ISL\_426888 -----  
EPI\_ISL\_426900 -----  
EPI\_ISL\_426901 -----  
EPI\_ISL\_426903 -----  
EPI\_ISL\_426904 -----  
EPI\_ISL\_426907 -----  
EPI\_ISL\_426910 -----



ORF1ab 3361 TPKYK FVRIQPGQTFSVLACYNGSPSGVYQCAMRPNFTIKGSFLNGSCG SVGFNIDYDCV  
EPI\_ISL\_413575 -----  
EPI\_ISL\_413588 -----  
EPI\_ISL\_413589 -----  
EPI\_ISL\_424221 -----  
EPI\_ISL\_424233 -----  
EPI\_ISL\_424236 -----  
EPI\_ISL\_424238 -----  
EPI\_ISL\_424248 -----  
EPI\_ISL\_424254 -----  
EPI\_ISL\_425548 -----  
EPI\_ISL\_425581 -----  
EPI\_ISL\_426881 -----  
EPI\_ISL\_426883 -----  
EPI\_ISL\_426888 -----  
EPI\_ISL\_426900 -----  
EPI\_ISL\_426901 -----  
EPI\_ISL\_426903 -----  
EPI\_ISL\_426904 -----  
EPI\_ISL\_426907 -----  
EPI\_ISL\_426910 -----  
ORF1ab 3361 TPKYK FVRIQPGQTFSVLACYNGSPSGVYQCAMRPNFTIKGSFLNGSCG SVGFNIDYDCV  
EPI\_ISL\_413575 -----  
EPI\_ISL\_413588 -----  
EPI\_ISL\_413589 -----  
EPI\_ISL\_424221 -----  
EPI\_ISL\_424233 -----  
EPI\_ISL\_424236 -----  
EPI\_ISL\_424238 -----  
EPI\_ISL\_424248 -----  
EPI\_ISL\_424254 -----  
EPI\_ISL\_425548 -----  
EPI\_ISL\_425581 -----  
EPI\_ISL\_426881 -----  
EPI\_ISL\_426883 -----  
EPI\_ISL\_426888 -----  
EPI\_ISL\_426900 -----  
EPI\_ISL\_426901 -----  
EPI\_ISL\_426903 -----  
EPI\_ISL\_426904 -----  
EPI\_ISL\_426907 -----  
EPI\_ISL\_426910 -----

```
ORF1ab          3421 SFCYMHHMELPTGVHAGTDLEGNFYGPFVDRQTAQAAGTDTTITVNVVLAWLYAAVINGDR
EPI_ISL_413575 -----
EPI_ISL_413588 -----
EPI_ISL_413589 -----
EPI_ISL_424221 -----
EPI_ISL_424233 -----
EPI_ISL_424236 -----
EPI_ISL_424238 -----
EPI_ISL_424248 -----
EPI_ISL_424254 -----
EPI_ISL_425548 -----
EPI_ISL_425581 -----
EPI_ISL_426881 -----
EPI_ISL_426883 -----
EPI_ISL_426888 -----
EPI_ISL_426900 -----
EPI_ISL_426901 -----
EPI_ISL_426903 -----
EPI_ISL_426904 -----
EPI_ISL_426907 -----
EPI_ISL_426910 -----
ORF1ab          3421 SFCYMHHMELPTGVHAGTDLEGNFYGPFVDRQTAQAAGTDTTITVNVVLAWLYAAVINGDR
EPI_ISL_413575 -----
EPI_ISL_413588 -----
EPI_ISL_413589 -----
EPI_ISL_424221 -----
EPI_ISL_424233 -----
EPI_ISL_424236 -----
EPI_ISL_424238 -----
EPI_ISL_424248 -----
EPI_ISL_424254 -----
EPI_ISL_425548 -----
EPI_ISL_425581 -----
EPI_ISL_426881 -----
EPI_ISL_426883 -----
EPI_ISL_426888 -----
EPI_ISL_426900 -----
EPI_ISL_426901 -----
EPI_ISL_426903 -----
EPI_ISL_426904 -----
EPI_ISL_426907 -----
EPI_ISL_426910 -----
```

ORF1ab 3481 WFLNRFTTTTLNDFNLVAMKYNYEPLTQDHVDILGPLSAQTGIAVLDMCASLKELLQNGMN  
EPI\_ISL\_413575 -----  
EPI\_ISL\_413588 -----  
EPI\_ISL\_413589 -----  
EPI\_ISL\_424221 -----  
EPI\_ISL\_424233 -----  
EPI\_ISL\_424236 -----  
EPI\_ISL\_424238 -----  
EPI\_ISL\_424248 -----  
EPI\_ISL\_424254 -----  
EPI\_ISL\_425548 -----  
EPI\_ISL\_425581 -----  
EPI\_ISL\_426881 -----  
EPI\_ISL\_426883 -----  
EPI\_ISL\_426888 -----  
EPI\_ISL\_426900 -----  
EPI\_ISL\_426901 -----  
EPI\_ISL\_426903 -----  
EPI\_ISL\_426904 -----  
EPI\_ISL\_426907 -----  
EPI\_ISL\_426910 -----  
ORF1ab 3481 WFLNRFTTTTLNDFNLVAMKYNYEPLTQDHVDILGPLSAQTGIAVLDMCASLKELLQNGMN  
EPI\_ISL\_413575 -----  
EPI\_ISL\_413588 -----  
EPI\_ISL\_413589 -----  
EPI\_ISL\_424221 -----  
EPI\_ISL\_424233 -----  
EPI\_ISL\_424236 -----  
EPI\_ISL\_424238 -----  
EPI\_ISL\_424248 -----  
EPI\_ISL\_424254 -----  
EPI\_ISL\_425548 -----  
EPI\_ISL\_425581 -----  
EPI\_ISL\_426881 -----  
EPI\_ISL\_426883 -----  
EPI\_ISL\_426888 -----  
EPI\_ISL\_426900 -----  
EPI\_ISL\_426901 -----  
EPI\_ISL\_426903 -----  
EPI\_ISL\_426904 -----  
EPI\_ISL\_426907 -----  
EPI\_ISL\_426910 -----

ORF1ab 3541 GRTILGSALLEDEFTPFVVRQCSGVTFQSAVKRTIKGTHHWLLLLTILTSLLVLVQSTQW  
EPI\_ISL\_413575 -----  
EPI\_ISL\_413588 -----  
EPI\_ISL\_413589 -----  
EPI\_ISL\_424221 -----  
EPI\_ISL\_424233 -----  
EPI\_ISL\_424236 -----  
EPI\_ISL\_424238 -----  
EPI\_ISL\_424248 -----  
EPI\_ISL\_424254 -----  
EPI\_ISL\_425548 -----  
EPI\_ISL\_425581 -----  
EPI\_ISL\_426881 -----  
EPI\_ISL\_426883 -----  
EPI\_ISL\_426888 -----  
EPI\_ISL\_426900 -----  
EPI\_ISL\_426901 -----  
EPI\_ISL\_426903 -----  
EPI\_ISL\_426904 -----  
EPI\_ISL\_426907 -----  
EPI\_ISL\_426910 -----  
ORF1ab 3541 GRTILGSALLEDEFTPFVVRQCSGVTFQSAVKRTIKGTHHWLLLLTILTSLLVLVQSTQW  
EPI\_ISL\_413575 -----  
EPI\_ISL\_413588 -----  
EPI\_ISL\_413589 -----  
EPI\_ISL\_424221 -----  
EPI\_ISL\_424233 -----  
EPI\_ISL\_424236 -----  
EPI\_ISL\_424238 -----  
EPI\_ISL\_424248 -----  
EPI\_ISL\_424254 -----  
EPI\_ISL\_425548 -----  
EPI\_ISL\_425581 -----  
EPI\_ISL\_426881 -----  
EPI\_ISL\_426883 -----  
EPI\_ISL\_426888 -----  
EPI\_ISL\_426900 -----  
EPI\_ISL\_426901 -----  
EPI\_ISL\_426903 -----  
EPI\_ISL\_426904 -----  
EPI\_ISL\_426907 -----  
EPI\_ISL\_426910 -----

ORF1ab 3601 SLFFFLYENAF L P F A M G I I A M S A F A M M F V K H K H A F L C L F L L P S L A T V A Y F N M V Y M P A S W V  
EPI\_ISL\_413575 -----  
EPI\_ISL\_413588 -----  
EPI\_ISL\_413589 -----  
EPI\_ISL\_424221 -----  
EPI\_ISL\_424233 -----  
EPI\_ISL\_424236 -----  
EPI\_ISL\_424238 -----  
EPI\_ISL\_424248 -----  
EPI\_ISL\_424254 -----  
EPI\_ISL\_425548 -----  
EPI\_ISL\_425581 -----  
EPI\_ISL\_426881 -----  
EPI\_ISL\_426883 -----  
EPI\_ISL\_426888 -----  
EPI\_ISL\_426900 -----  
EPI\_ISL\_426901 -----  
EPI\_ISL\_426903 -----  
EPI\_ISL\_426904 -----  
EPI\_ISL\_426907 -----  
EPI\_ISL\_426910 -----  
ORF1ab 3601 SLFFFLYENAF L P F A M G I I A M S A F A M M F V K H K H A F L C L F L L P S L A T V A Y F N M V Y M P A S W V  
EPI\_ISL\_413575 -----  
EPI\_ISL\_413588 -----  
EPI\_ISL\_413589 -----  
EPI\_ISL\_424221 -----  
EPI\_ISL\_424233 -----  
EPI\_ISL\_424236 -----  
EPI\_ISL\_424238 -----  
EPI\_ISL\_424248 -----  
EPI\_ISL\_424254 -----  
EPI\_ISL\_425548 -----  
EPI\_ISL\_425581 -----  
EPI\_ISL\_426881 -----  
EPI\_ISL\_426883 -----  
EPI\_ISL\_426888 -----  
EPI\_ISL\_426900 -----  
EPI\_ISL\_426901 -----  
EPI\_ISL\_426903 -----  
EPI\_ISL\_426904 -----  
EPI\_ISL\_426907 -----  
EPI\_ISL\_426910 -----

ORF1ab 3661 MRIMTWLDMVDTSLSGFKLKDCVMYASAVVLLILMTARTVYDDGARRVWTLMNVLTLVYK  
EPI\_ISL\_413575 -----  
EPI\_ISL\_413588 -----  
EPI\_ISL\_413589 -----  
EPI\_ISL\_424221 -----  
EPI\_ISL\_424233 -----  
EPI\_ISL\_424236 -----  
EPI\_ISL\_424238 -----  
EPI\_ISL\_424248 -----  
EPI\_ISL\_424254 -----  
EPI\_ISL\_425548 -----  
EPI\_ISL\_425581 -----  
EPI\_ISL\_426881 -----  
EPI\_ISL\_426883 -----  
EPI\_ISL\_426888 -----  
EPI\_ISL\_426900 -----  
EPI\_ISL\_426901 -----  
EPI\_ISL\_426903 -----  
EPI\_ISL\_426904 -----  
EPI\_ISL\_426907 -----  
EPI\_ISL\_426910 -----  
ORF1ab 3661 MRIMTWLDMVDTSLSGFKLKDCVMYASAVVLLILMTARTVYDDGARRVWTLMNVLTLVYK  
EPI\_ISL\_413575 -----  
EPI\_ISL\_413588 -----  
EPI\_ISL\_413589 -----  
EPI\_ISL\_424221 -----  
EPI\_ISL\_424233 -----  
EPI\_ISL\_424236 -----  
EPI\_ISL\_424238 -----  
EPI\_ISL\_424248 -----  
EPI\_ISL\_424254 -----  
EPI\_ISL\_425548 -----  
EPI\_ISL\_425581 -----  
EPI\_ISL\_426881 -----  
EPI\_ISL\_426883 -----  
EPI\_ISL\_426888 -----  
EPI\_ISL\_426900 -----  
EPI\_ISL\_426901 -----  
EPI\_ISL\_426903 -----  
EPI\_ISL\_426904 -----  
EPI\_ISL\_426907 -----  
EPI\_ISL\_426910 -----

ORF1ab 3721 VYYGNALDQAISMWALII SVTSNYSGVVTTVMFLARGIVFMCVEYCP IFFITGNTLQCIM  
EPI\_ISL\_413575 -----  
EPI\_ISL\_413588 -----  
EPI\_ISL\_413589 -----  
EPI\_ISL\_424221 -----  
EPI\_ISL\_424233 -----  
EPI\_ISL\_424236 -----  
EPI\_ISL\_424238 -----  
EPI\_ISL\_424248 -----  
EPI\_ISL\_424254 -----  
EPI\_ISL\_425548 -----  
EPI\_ISL\_425581 -----  
EPI\_ISL\_426881 -----  
EPI\_ISL\_426883 -----  
EPI\_ISL\_426888 -----  
EPI\_ISL\_426900 -----  
EPI\_ISL\_426901 -----  
EPI\_ISL\_426903 -----  
EPI\_ISL\_426904 -----  
EPI\_ISL\_426907 -----  
EPI\_ISL\_426910 -----  
ORF1ab 3721 VYYGNALDQAISMWALII SVTSNYSGVVTTVMFLARGIVFMCVEYCP IFFITGNTLQCIM  
EPI\_ISL\_413575 -----  
EPI\_ISL\_413588 -----  
EPI\_ISL\_413589 -----  
EPI\_ISL\_424221 -----  
EPI\_ISL\_424233 -----  
EPI\_ISL\_424236 -----  
EPI\_ISL\_424238 -----  
EPI\_ISL\_424248 -----  
EPI\_ISL\_424254 -----  
EPI\_ISL\_425548 -----  
EPI\_ISL\_425581 -----  
EPI\_ISL\_426881 -----  
EPI\_ISL\_426883 -----  
EPI\_ISL\_426888 -----  
EPI\_ISL\_426900 -----  
EPI\_ISL\_426901 -----  
EPI\_ISL\_426903 -----  
EPI\_ISL\_426904 -----  
EPI\_ISL\_426907 -----  
EPI\_ISL\_426910 -----

ORF1ab 3781 LVYCFLGYFCTCYFGLFCLLNRYFRLTLGVYDYLSTQEFRYMNSQGLLPPKNSIDAFKL  
EPI\_ISL\_413575 -----  
EPI\_ISL\_413588 -----  
EPI\_ISL\_413589 -----  
EPI\_ISL\_424221 -----  
EPI\_ISL\_424233 -----  
EPI\_ISL\_424236 -----  
EPI\_ISL\_424238 -----  
EPI\_ISL\_424248 -----  
EPI\_ISL\_424254 -----  
EPI\_ISL\_425548 -----  
EPI\_ISL\_425581 -----  
EPI\_ISL\_426881 -----  
EPI\_ISL\_426883 -----  
EPI\_ISL\_426888 -----  
EPI\_ISL\_426900 -----  
EPI\_ISL\_426901 -----  
EPI\_ISL\_426903 -----  
EPI\_ISL\_426904 -----  
EPI\_ISL\_426907 -----  
EPI\_ISL\_426910 -----  
ORF1ab 3781 LVYCFLGYFCTCYFGLFCLLNRYFRLTLGVYDYLSTQEFRYMNSQGLLPPKNSIDAFKL  
EPI\_ISL\_413575 -----  
EPI\_ISL\_413588 -----  
EPI\_ISL\_413589 -----  
EPI\_ISL\_424221 -----  
EPI\_ISL\_424233 -----  
EPI\_ISL\_424236 -----  
EPI\_ISL\_424238 -----  
EPI\_ISL\_424248 -----  
EPI\_ISL\_424254 -----  
EPI\_ISL\_425548 -----  
EPI\_ISL\_425581 -----  
EPI\_ISL\_426881 -----  
EPI\_ISL\_426883 -----  
EPI\_ISL\_426888 -----  
EPI\_ISL\_426900 -----  
EPI\_ISL\_426901 -----  
EPI\_ISL\_426903 -----  
EPI\_ISL\_426904 -----  
EPI\_ISL\_426907 -----  
EPI\_ISL\_426910 -----



ORF1ab 3841 NIKLLGVGGKPCIKVATVQSKMSDVKCTSVVLLSVLQQLRVESSSKLWAQCVQLHNDILL  
EPI\_ISL\_413575 -----  
EPI\_ISL\_413588 -----  
EPI\_ISL\_413589 -----  
EPI\_ISL\_424221 -----  
EPI\_ISL\_424233 -----  
EPI\_ISL\_424236 -----  
EPI\_ISL\_424238 -----  
EPI\_ISL\_424248 -----  
EPI\_ISL\_424254 -----  
EPI\_ISL\_425548 -----  
EPI\_ISL\_425581 -----  
EPI\_ISL\_426881 -----  
EPI\_ISL\_426883 -----  
EPI\_ISL\_426888 -----  
EPI\_ISL\_426900 -----  
EPI\_ISL\_426901 -----  
EPI\_ISL\_426903 -----  
EPI\_ISL\_426904 -----  
EPI\_ISL\_426907 -----  
EPI\_ISL\_426910 -----  
ORF1ab 3841 NIKLLGVGGKPCIKVATVQSKMSDVKCTSVVLLSVLQQLRVESSSKLWAQCVQLHNDILL  
EPI\_ISL\_413575 -----  
EPI\_ISL\_413588 -----  
EPI\_ISL\_413589 -----  
EPI\_ISL\_424221 -----  
EPI\_ISL\_424233 -----  
EPI\_ISL\_424236 -----  
EPI\_ISL\_424238 -----  
EPI\_ISL\_424248 -----  
EPI\_ISL\_424254 -----  
EPI\_ISL\_425548 -----  
EPI\_ISL\_425581 -----  
EPI\_ISL\_426881 -----  
EPI\_ISL\_426883 -----  
EPI\_ISL\_426888 -----  
EPI\_ISL\_426900 -----  
EPI\_ISL\_426901 -----  
EPI\_ISL\_426903 -----  
EPI\_ISL\_426904 -----  
EPI\_ISL\_426907 -----  
EPI\_ISL\_426910 -----

ORF1ab 3901 AKDTTEAFEKMSVLLSVLLSMQGAVDINKLCEEMLDNRATLQAIASEFSSLPSYAAFATA  
EPI\_ISL\_413575 -----  
EPI\_ISL\_413588 -----  
EPI\_ISL\_413589 -----  
EPI\_ISL\_424221 -----  
EPI\_ISL\_424233 -----  
EPI\_ISL\_424236 -----  
EPI\_ISL\_424238 -----  
EPI\_ISL\_424248 -----  
EPI\_ISL\_424254 -----  
EPI\_ISL\_425548 -----  
EPI\_ISL\_425581 -----  
EPI\_ISL\_426881 -----  
EPI\_ISL\_426883 -----  
EPI\_ISL\_426888 -----  
EPI\_ISL\_426900 -----  
EPI\_ISL\_426901 -----  
EPI\_ISL\_426903 -----  
EPI\_ISL\_426904 -----  
EPI\_ISL\_426907 -----  
EPI\_ISL\_426910 -----  
ORF1ab 3901 AKDTTEAFEKMSVLLSVLLSMQGAVDINKLCEEMLDNRATLQAIASEFSSLPSYAAFATA  
EPI\_ISL\_413575 -----  
EPI\_ISL\_413588 -----  
EPI\_ISL\_413589 -----  
EPI\_ISL\_424221 -----  
EPI\_ISL\_424233 -----  
EPI\_ISL\_424236 -----  
EPI\_ISL\_424238 -----  
EPI\_ISL\_424248 -----  
EPI\_ISL\_424254 -----  
EPI\_ISL\_425548 -----  
EPI\_ISL\_425581 -----  
EPI\_ISL\_426881 -----  
EPI\_ISL\_426883 -----  
EPI\_ISL\_426888 -----  
EPI\_ISL\_426900 -----  
EPI\_ISL\_426901 -----  
EPI\_ISL\_426903 -----  
EPI\_ISL\_426904 -----  
EPI\_ISL\_426907 -----  
EPI\_ISL\_426910 -----

ORF1ab 3961 QEAYEQAVANGDSEVVLKLLKSLNVAKSEFDRDAAMQRKLEKMDQAMTQMYKQARSED  
EPI\_ISL\_413575 -----  
EPI\_ISL\_413588 -----  
EPI\_ISL\_413589 -----  
EPI\_ISL\_424221 -----  
EPI\_ISL\_424233 -----  
EPI\_ISL\_424236 -----  
EPI\_ISL\_424238 -----  
EPI\_ISL\_424248 -----  
EPI\_ISL\_424254 -----  
EPI\_ISL\_425548 -----  
EPI\_ISL\_425581 -----  
EPI\_ISL\_426881 -----  
EPI\_ISL\_426883 -----  
EPI\_ISL\_426888 -----  
EPI\_ISL\_426900 -----  
EPI\_ISL\_426901 -----  
EPI\_ISL\_426903 -----  
EPI\_ISL\_426904 -----  
EPI\_ISL\_426907 -----  
EPI\_ISL\_426910 -----  
ORF1ab 3961 QEAYEQAVANGDSEVVLKLLKSLNVAKSEFDRDAAMQRKLEKMDQAMTQMYKQARSED  
EPI\_ISL\_413575 -----  
EPI\_ISL\_413588 -----  
EPI\_ISL\_413589 -----  
EPI\_ISL\_424221 -----  
EPI\_ISL\_424233 -----  
EPI\_ISL\_424236 -----  
EPI\_ISL\_424238 -----  
EPI\_ISL\_424248 -----  
EPI\_ISL\_424254 -----  
EPI\_ISL\_425548 -----  
EPI\_ISL\_425581 -----  
EPI\_ISL\_426881 -----  
EPI\_ISL\_426883 -----  
EPI\_ISL\_426888 -----  
EPI\_ISL\_426900 -----  
EPI\_ISL\_426901 -----  
EPI\_ISL\_426903 -----  
EPI\_ISL\_426904 -----  
EPI\_ISL\_426907 -----  
EPI\_ISL\_426910 -----

ORF1ab 4021 KRAKVTSAMQTMLFTMLRKLNDNDALNNIINNARDGCVPLNIIPLTTAAKLMVVI PDYNTY  
EPI\_ISL\_413575 -----  
EPI\_ISL\_413588 -----  
EPI\_ISL\_413589 -----  
EPI\_ISL\_424221 -----  
EPI\_ISL\_424233 -----  
EPI\_ISL\_424236 -----  
EPI\_ISL\_424238 -----  
EPI\_ISL\_424248 -----  
EPI\_ISL\_424254 -----  
EPI\_ISL\_425548 -----  
EPI\_ISL\_425581 -----  
EPI\_ISL\_426881 -----  
EPI\_ISL\_426883 -----  
EPI\_ISL\_426888 -----  
EPI\_ISL\_426900 -----  
EPI\_ISL\_426901 -----  
EPI\_ISL\_426903 -----  
EPI\_ISL\_426904 -----  
EPI\_ISL\_426907 -----  
EPI\_ISL\_426910 -----  
ORF1ab 4021 KRAKVTSAMQTMLFTMLRKLNDNDALNNIINNARDGCVPLNIIPLTTAAKLMVVI PDYNTY  
EPI\_ISL\_413575 -----  
EPI\_ISL\_413588 -----  
EPI\_ISL\_413589 -----  
EPI\_ISL\_424221 -----  
EPI\_ISL\_424233 -----  
EPI\_ISL\_424236 -----  
EPI\_ISL\_424238 -----  
EPI\_ISL\_424248 -----  
EPI\_ISL\_424254 -----  
EPI\_ISL\_425548 -----  
EPI\_ISL\_425581 -----  
EPI\_ISL\_426881 -----  
EPI\_ISL\_426883 -----  
EPI\_ISL\_426888 -----  
EPI\_ISL\_426900 -----  
EPI\_ISL\_426901 -----  
EPI\_ISL\_426903 -----  
EPI\_ISL\_426904 -----  
EPI\_ISL\_426907 -----  
EPI\_ISL\_426910 -----

ORF1ab 4081 KNTCDGTTFTYASALWEIQQVVDADSKIVQLSEISMDNSPNLAWPLIVTALRANSVAVKLQ  
EPI\_ISL\_413575 -----  
EPI\_ISL\_413588 -----  
EPI\_ISL\_413589 -----  
EPI\_ISL\_424221 -----  
EPI\_ISL\_424233 -----  
EPI\_ISL\_424236 -----  
EPI\_ISL\_424238 -----  
EPI\_ISL\_424248 -----  
EPI\_ISL\_424254 -----  
EPI\_ISL\_425548 -----  
EPI\_ISL\_425581 -----  
EPI\_ISL\_426881 -----  
EPI\_ISL\_426883 -----  
EPI\_ISL\_426888 -----  
EPI\_ISL\_426900 -----  
EPI\_ISL\_426901 -----  
EPI\_ISL\_426903 -----  
EPI\_ISL\_426904 -----  
EPI\_ISL\_426907 -----  
EPI\_ISL\_426910 -----  
ORF1ab 4081 KNTCDGTTFTYASALWEIQQVVDADSKIVQLSEISMDNSPNLAWPLIVTALRANSVAVKLQ  
EPI\_ISL\_413575 -----  
EPI\_ISL\_413588 -----  
EPI\_ISL\_413589 -----  
EPI\_ISL\_424221 -----  
EPI\_ISL\_424233 -----  
EPI\_ISL\_424236 -----  
EPI\_ISL\_424238 -----  
EPI\_ISL\_424248 -----  
EPI\_ISL\_424254 -----  
EPI\_ISL\_425548 -----  
EPI\_ISL\_425581 -----  
EPI\_ISL\_426881 -----  
EPI\_ISL\_426883 -----  
EPI\_ISL\_426888 -----  
EPI\_ISL\_426900 -----  
EPI\_ISL\_426901 -----  
EPI\_ISL\_426903 -----  
EPI\_ISL\_426904 -----  
EPI\_ISL\_426907 -----  
EPI\_ISL\_426910 -----

ORF1ab 4141 NNELSPVALRQMSCAAGTTQTACTDDNALAYYNTTKGGRFVLALLSDLQDLKWARFPKSD  
EPI\_ISL\_413575 -----  
EPI\_ISL\_413588 -----  
EPI\_ISL\_413589 -----  
EPI\_ISL\_424221 -----  
EPI\_ISL\_424233 -----  
EPI\_ISL\_424236 -----  
EPI\_ISL\_424238 -----  
EPI\_ISL\_424248 -----  
EPI\_ISL\_424254 -----  
EPI\_ISL\_425548 -----  
EPI\_ISL\_425581 -----  
EPI\_ISL\_426881 -----  
EPI\_ISL\_426883 -----  
EPI\_ISL\_426888 -----  
EPI\_ISL\_426900 -----  
EPI\_ISL\_426901 -----  
EPI\_ISL\_426903 -----  
EPI\_ISL\_426904 -----  
EPI\_ISL\_426907 -----  
EPI\_ISL\_426910 -----  
ORF1ab 4141 NNELSPVALRQMSCAAGTTQTACTDDNALAYYNTTKGGRFVLALLSDLQDLKWARFPKSD  
EPI\_ISL\_413575 -----  
EPI\_ISL\_413588 -----  
EPI\_ISL\_413589 -----  
EPI\_ISL\_424221 -----  
EPI\_ISL\_424233 -----  
EPI\_ISL\_424236 -----  
EPI\_ISL\_424238 -----  
EPI\_ISL\_424248 -----  
EPI\_ISL\_424254 -----  
EPI\_ISL\_425548 -----  
EPI\_ISL\_425581 -----  
EPI\_ISL\_426881 -----  
EPI\_ISL\_426883 -----  
EPI\_ISL\_426888 -----  
EPI\_ISL\_426900 -----  
EPI\_ISL\_426901 -----  
EPI\_ISL\_426903 -----  
EPI\_ISL\_426904 -----  
EPI\_ISL\_426907 -----  
EPI\_ISL\_426910 -----

```
ORF1ab      4201 GTGTIYTELEPPCRFVTDTPKGPKVKYLYFIKGLNNLNRMVGLGSLAATVRLQAGNATEV
EPI_ISL_413575 -----
EPI_ISL_413588 -----
EPI_ISL_413589 -----
EPI_ISL_424221 -----
EPI_ISL_424233 -----
EPI_ISL_424236 -----
EPI_ISL_424238 -----
EPI_ISL_424248 -----
EPI_ISL_424254 -----
EPI_ISL_425548 -----
EPI_ISL_425581 -----
EPI_ISL_426881 -----
EPI_ISL_426883 -----
EPI_ISL_426888 -----
EPI_ISL_426900 -----
EPI_ISL_426901 -----
EPI_ISL_426903 -----
EPI_ISL_426904 -----
EPI_ISL_426907 -----
EPI_ISL_426910 -----
ORF1ab      4201 GTGTIYTELEPPCRFVTDTPKGPKVKYLYFIKGLNNLNRMVGLGSLAATVRLQAGNATEV
EPI_ISL_413575 -----
EPI_ISL_413588 -----
EPI_ISL_413589 -----
EPI_ISL_424221 -----
EPI_ISL_424233 -----
EPI_ISL_424236 -----
EPI_ISL_424238 -----
EPI_ISL_424248 -----
EPI_ISL_424254 -----
EPI_ISL_425548 -----
EPI_ISL_425581 -----
EPI_ISL_426881 -----
EPI_ISL_426883 -----
EPI_ISL_426888 -----
EPI_ISL_426900 -----
EPI_ISL_426901 -----
EPI_ISL_426903 -----
EPI_ISL_426904 -----
EPI_ISL_426907 -----
EPI_ISL_426910 -----
```

ORF1ab 4261 PANSTVLSFCAFAVDAAKAYKDYLASGGQPITNCVKMLCTHTGTGQAITVTPEANMDQES  
EPI\_ISL\_413575 -----  
EPI\_ISL\_413588 -----  
EPI\_ISL\_413589 -----  
EPI\_ISL\_424221 -----  
EPI\_ISL\_424233 -----  
EPI\_ISL\_424236 -----  
EPI\_ISL\_424238 -----  
EPI\_ISL\_424248 -----  
EPI\_ISL\_424254 -----  
EPI\_ISL\_425548 -----  
EPI\_ISL\_425581 -----  
EPI\_ISL\_426881 -----  
EPI\_ISL\_426883 -----  
EPI\_ISL\_426888 -----  
EPI\_ISL\_426900 -----  
EPI\_ISL\_426901 -----  
EPI\_ISL\_426903 -----  
EPI\_ISL\_426904 -----  
EPI\_ISL\_426907 -----  
EPI\_ISL\_426910 -----  
ORF1ab 4261 PANSTVLSFCAFAVDAAKAYKDYLASGGQPITNCVKMLCTHTGTGQAITVTPEANMDQES  
EPI\_ISL\_413575 -----  
EPI\_ISL\_413588 -----  
EPI\_ISL\_413589 -----  
EPI\_ISL\_424221 -----  
EPI\_ISL\_424233 -----  
EPI\_ISL\_424236 -----  
EPI\_ISL\_424238 -----  
EPI\_ISL\_424248 -----  
EPI\_ISL\_424254 -----  
EPI\_ISL\_425548 -----  
EPI\_ISL\_425581 -----  
EPI\_ISL\_426881 -----  
EPI\_ISL\_426883 -----  
EPI\_ISL\_426888 -----  
EPI\_ISL\_426900 -----  
EPI\_ISL\_426901 -----  
EPI\_ISL\_426903 -----  
EPI\_ISL\_426904 -----  
EPI\_ISL\_426907 -----  
EPI\_ISL\_426910 -----



```
ORF1ab      4321 FGGASCCLYCRCHIDHPNPKGFCDLKGKYVQIPTTCANDPVGFTLKN TVCTVCGMWKGYG
EPI_ISL_413575 -----
EPI_ISL_413588 -----
EPI_ISL_413589 -----
EPI_ISL_424221 -----
EPI_ISL_424233 -----
EPI_ISL_424236 -----
EPI_ISL_424238 -----
EPI_ISL_424248 -----
EPI_ISL_424254 -----
EPI_ISL_425548 -----
EPI_ISL_425581 -----
EPI_ISL_426881 -----
EPI_ISL_426883 -----
EPI_ISL_426888 -----
EPI_ISL_426900 -----
EPI_ISL_426901 -----
EPI_ISL_426903 -----
EPI_ISL_426904 -----
EPI_ISL_426907 -----
EPI_ISL_426910 -----
ORF1ab      4321 FGGASCCLYCRCHIDHPNPKGFCDLKGKYVQIPTTCANDPVGFTLKN TVCTVCGMWKGYG
EPI_ISL_413575 -----
EPI_ISL_413588 -----
EPI_ISL_413589 -----
EPI_ISL_424221 -----
EPI_ISL_424233 -----
EPI_ISL_424236 -----
EPI_ISL_424238 -----
EPI_ISL_424248 -----
EPI_ISL_424254 -----
EPI_ISL_425548 -----
EPI_ISL_425581 -----
EPI_ISL_426881 -----
EPI_ISL_426883 -----
EPI_ISL_426888 -----
EPI_ISL_426900 -----
EPI_ISL_426901 -----
EPI_ISL_426903 -----
EPI_ISL_426904 -----
EPI_ISL_426907 -----
EPI_ISL_426910 -----
```

ORF1ab 4381 CSCDQLREPMLQSADAQSFLNRVCGVSAARLTPCGTGTSTDVVYRAFDIYNDKVAGFAKF  
EPI\_ISL\_413575 -----  
EPI\_ISL\_413588 -----  
EPI\_ISL\_413589 -----  
EPI\_ISL\_424221 -----  
EPI\_ISL\_424233 -----  
EPI\_ISL\_424236 -----  
EPI\_ISL\_424238 -----  
EPI\_ISL\_424248 -----  
EPI\_ISL\_424254 -----  
EPI\_ISL\_425548 -----  
EPI\_ISL\_425581 -----  
EPI\_ISL\_426881 -----  
EPI\_ISL\_426883 -----  
EPI\_ISL\_426888 -----  
EPI\_ISL\_426900 -----  
EPI\_ISL\_426901 -----  
EPI\_ISL\_426903 -----  
EPI\_ISL\_426904 -----  
EPI\_ISL\_426907 -----  
EPI\_ISL\_426910 -----  
ORF1ab 4381 CSCDQLREPMLQSADAQSFLNRVCGVSAARLTPCGTGTSTDVVYRAFDIYNDKVAGFAKF  
EPI\_ISL\_413575 -----  
EPI\_ISL\_413588 -----  
EPI\_ISL\_413589 -----  
EPI\_ISL\_424221 -----  
EPI\_ISL\_424233 -----  
EPI\_ISL\_424236 -----  
EPI\_ISL\_424238 -----  
EPI\_ISL\_424248 -----  
EPI\_ISL\_424254 -----  
EPI\_ISL\_425548 -----  
EPI\_ISL\_425581 -----  
EPI\_ISL\_426881 -----  
EPI\_ISL\_426883 -----  
EPI\_ISL\_426888 -----  
EPI\_ISL\_426900 -----  
EPI\_ISL\_426901 -----  
EPI\_ISL\_426903 -----  
EPI\_ISL\_426904 -----  
EPI\_ISL\_426907 -----  
EPI\_ISL\_426910 -----

ORF1ab 4441 LKTNCCRFQEKDEDDNLDISYFVVKRHTFSNYQHEETIYNLLKDCPAVAKHDFFKFRIDG  
EPI\_ISL\_413575 -----  
EPI\_ISL\_413588 -----  
EPI\_ISL\_413589 -----  
EPI\_ISL\_424221 -----  
EPI\_ISL\_424233 -----  
EPI\_ISL\_424236 -----  
EPI\_ISL\_424238 -----  
EPI\_ISL\_424248 -----  
EPI\_ISL\_424254 -----  
EPI\_ISL\_425548 -----  
EPI\_ISL\_425581 -----  
EPI\_ISL\_426881 -----  
EPI\_ISL\_426883 -----  
EPI\_ISL\_426888 -----  
EPI\_ISL\_426900 -----  
EPI\_ISL\_426901 -----  
EPI\_ISL\_426903 -----  
EPI\_ISL\_426904 -----  
EPI\_ISL\_426907 -----  
EPI\_ISL\_426910 -----  
ORF1ab 4441 LKTNCCRFQEKDEDDNLDISYFVVKRHTFSNYQHEETIYNLLKDCPAVAKHDFFKFRIDG  
EPI\_ISL\_413575 -----  
EPI\_ISL\_413588 -----  
EPI\_ISL\_413589 -----  
EPI\_ISL\_424221 -----  
EPI\_ISL\_424233 -----  
EPI\_ISL\_424236 -----  
EPI\_ISL\_424238 -----  
EPI\_ISL\_424248 -----  
EPI\_ISL\_424254 -----  
EPI\_ISL\_425548 -----  
EPI\_ISL\_425581 -----  
EPI\_ISL\_426881 -----  
EPI\_ISL\_426883 -----  
EPI\_ISL\_426888 -----  
EPI\_ISL\_426900 -----  
EPI\_ISL\_426901 -----  
EPI\_ISL\_426903 -----  
EPI\_ISL\_426904 -----  
EPI\_ISL\_426907 -----  
EPI\_ISL\_426910 -----

ORF1ab 4501 DMVPHISRQRLTKYTMADLVYALRHFDEGNCDTLKEILVTYNCCDDDYFNKKDWYDFVEN  
EPI\_ISL\_413575 -----  
EPI\_ISL\_413588 -----  
EPI\_ISL\_413589 -----  
EPI\_ISL\_424221 -----  
EPI\_ISL\_424233 -----  
EPI\_ISL\_424236 -----  
EPI\_ISL\_424238 -----  
EPI\_ISL\_424248 -----  
EPI\_ISL\_424254 -----  
EPI\_ISL\_425548 -----  
EPI\_ISL\_425581 -----  
EPI\_ISL\_426881 -----  
EPI\_ISL\_426883 -----  
EPI\_ISL\_426888 -----  
EPI\_ISL\_426900 -----  
EPI\_ISL\_426901 -----  
EPI\_ISL\_426903 -----  
EPI\_ISL\_426904 -----  
EPI\_ISL\_426907 -----  
EPI\_ISL\_426910 -----  
ORF1ab 4501 DMVPHISRQRLTKYTMADLVYALRHFDEGNCDTLKEILVTYNCCDDDYFNKKDWYDFVEN  
EPI\_ISL\_413575 -----  
EPI\_ISL\_413588 -----  
EPI\_ISL\_413589 -----  
EPI\_ISL\_424221 -----  
EPI\_ISL\_424233 -----  
EPI\_ISL\_424236 -----  
EPI\_ISL\_424238 -----  
EPI\_ISL\_424248 -----  
EPI\_ISL\_424254 -----  
EPI\_ISL\_425548 -----  
EPI\_ISL\_425581 -----  
EPI\_ISL\_426881 -----  
EPI\_ISL\_426883 -----  
EPI\_ISL\_426888 -----  
EPI\_ISL\_426900 -----  
EPI\_ISL\_426901 -----  
EPI\_ISL\_426903 -----  
EPI\_ISL\_426904 -----  
EPI\_ISL\_426907 -----  
EPI\_ISL\_426910 -----

ORF1ab 4561 PDILRVYANLGERVRQALLKTVQFCDAMRNAGIVGVLTLDNQDLNGNWWYDFGDFIQTTTPG  
EPI\_ISL\_413575 -----  
EPI\_ISL\_413588 -----  
EPI\_ISL\_413589 -----  
EPI\_ISL\_424221 -----  
EPI\_ISL\_424233 -----  
EPI\_ISL\_424236 -----  
EPI\_ISL\_424238 -----  
EPI\_ISL\_424248 -----  
EPI\_ISL\_424254 -----  
EPI\_ISL\_425548 -----  
EPI\_ISL\_425581 -----  
EPI\_ISL\_426881 -----  
EPI\_ISL\_426883 -----  
EPI\_ISL\_426888 -----  
EPI\_ISL\_426900 -----  
EPI\_ISL\_426901 -----  
EPI\_ISL\_426903 -----  
EPI\_ISL\_426904 -----  
EPI\_ISL\_426907 -----  
EPI\_ISL\_426910 -----  
ORF1ab 4561 PDILRVYANLGERVRQALLKTVQFCDAMRNAGIVGVLTLDNQDLNGNWWYDFGDFIQTTTPG  
EPI\_ISL\_413575 -----  
EPI\_ISL\_413588 -----  
EPI\_ISL\_413589 -----  
EPI\_ISL\_424221 -----  
EPI\_ISL\_424233 -----  
EPI\_ISL\_424236 -----  
EPI\_ISL\_424238 -----  
EPI\_ISL\_424248 -----  
EPI\_ISL\_424254 -----  
EPI\_ISL\_425548 -----  
EPI\_ISL\_425581 -----  
EPI\_ISL\_426881 -----  
EPI\_ISL\_426883 -----  
EPI\_ISL\_426888 -----  
EPI\_ISL\_426900 -----  
EPI\_ISL\_426901 -----  
EPI\_ISL\_426903 -----  
EPI\_ISL\_426904 -----  
EPI\_ISL\_426907 -----  
EPI\_ISL\_426910 -----

ORF1ab 4621 SGVPVVDSSYSSLMPILTLTRALTAESHVDTDLTKPYIKWDLLKYDFTEERLKLFD RYFK  
EPI\_ISL\_413575 -----  
EPI\_ISL\_413588 -----  
EPI\_ISL\_413589 -----  
EPI\_ISL\_424221 -----  
EPI\_ISL\_424233 -----  
EPI\_ISL\_424236 -----  
EPI\_ISL\_424238 -----  
EPI\_ISL\_424248 -----  
EPI\_ISL\_424254 -----  
EPI\_ISL\_425548 -----  
EPI\_ISL\_425581 -----  
EPI\_ISL\_426881 -----  
EPI\_ISL\_426883 -----  
EPI\_ISL\_426888 -----  
EPI\_ISL\_426900 -----  
EPI\_ISL\_426901 -----  
EPI\_ISL\_426903 -----  
EPI\_ISL\_426904 -----  
EPI\_ISL\_426907 -----  
EPI\_ISL\_426910 -----  
ORF1ab 4621 SGVPVVDSSYSSLMPILTLTRALTAESHVDTDLTKPYIKWDLLKYDFTEERLKLFD RYFK  
EPI\_ISL\_413575 -----  
EPI\_ISL\_413588 -----  
EPI\_ISL\_413589 -----  
EPI\_ISL\_424221 -----  
EPI\_ISL\_424233 -----  
EPI\_ISL\_424236 -----  
EPI\_ISL\_424238 -----  
EPI\_ISL\_424248 -----  
EPI\_ISL\_424254 -----  
EPI\_ISL\_425548 -----  
EPI\_ISL\_425581 -----  
EPI\_ISL\_426881 -----  
EPI\_ISL\_426883 -----  
EPI\_ISL\_426888 -----  
EPI\_ISL\_426900 -----  
EPI\_ISL\_426901 -----  
EPI\_ISL\_426903 -----  
EPI\_ISL\_426904 -----  
EPI\_ISL\_426907 -----  
EPI\_ISL\_426910 -----

```
ORF1ab          4681 YWDQTYHPNCVNCLDDRCILHCANFNVLVSTVFPPTSFGPLVRKIFVDGVPFVVSTGYHF
EPI_ISL_413575 -----
EPI_ISL_413588 -----
EPI_ISL_413589 -----
EPI_ISL_424221 -----
EPI_ISL_424233 -----
EPI_ISL_424236 -----
EPI_ISL_424238 -----
EPI_ISL_424248 -----
EPI_ISL_424254 -----
EPI_ISL_425548 -----
EPI_ISL_425581 -----
EPI_ISL_426881 -----
EPI_ISL_426883 -----
EPI_ISL_426888 -----
EPI_ISL_426900 -----
EPI_ISL_426901 -----
EPI_ISL_426903 -----
EPI_ISL_426904 -----
EPI_ISL_426907 -----
EPI_ISL_426910 -----
ORF1ab          4681 YWDQTYHPNCVNCLDDRCILHCANFNVLVSTVFPPTSFGPLVRKIFVDGVPFVVSTGYHF
EPI_ISL_413575 -----
EPI_ISL_413588 -----
EPI_ISL_413589 -----
EPI_ISL_424221 -----
EPI_ISL_424233 -----
EPI_ISL_424236 -----
EPI_ISL_424238 -----
EPI_ISL_424248 -----
EPI_ISL_424254 -----
EPI_ISL_425548 -----
EPI_ISL_425581 -----
EPI_ISL_426881 -----
EPI_ISL_426883 -----
EPI_ISL_426888 -----
EPI_ISL_426900 -----
EPI_ISL_426901 -----
EPI_ISL_426903 -----
EPI_ISL_426904 -----
EPI_ISL_426907 -----
EPI_ISL_426910 -----
```

ORF1ab 4741 RELGVVHNQDVNLHSSRLSFKELLVYAADPAMHAASGNLLLLDKRTTCFSVAALTNNVAFQ  
EPI\_ISL\_413575 -----  
EPI\_ISL\_413588 -----  
EPI\_ISL\_413589 -----  
EPI\_ISL\_424221 -----  
EPI\_ISL\_424233 -----  
EPI\_ISL\_424236 -----  
EPI\_ISL\_424238 -----  
EPI\_ISL\_424248 -----  
EPI\_ISL\_424254 -----  
EPI\_ISL\_425548 -----  
EPI\_ISL\_425581 -----  
EPI\_ISL\_426881 -----  
EPI\_ISL\_426883 -----  
EPI\_ISL\_426888 -----  
EPI\_ISL\_426900 -----  
EPI\_ISL\_426901 -----  
EPI\_ISL\_426903 -----  
EPI\_ISL\_426904 -----  
EPI\_ISL\_426907 -----  
EPI\_ISL\_426910 -----  
ORF1ab 4741 RELGVVHNQDVNLHSSRLSFKELLVYAADPAMHAASGNLLLLDKRTTCFSVAALTNNVAFQ  
EPI\_ISL\_413575 -----  
EPI\_ISL\_413588 -----  
EPI\_ISL\_413589 -----  
EPI\_ISL\_424221 -----  
EPI\_ISL\_424233 -----  
EPI\_ISL\_424236 -----  
EPI\_ISL\_424238 -----  
EPI\_ISL\_424248 -----  
EPI\_ISL\_424254 -----  
EPI\_ISL\_425548 -----  
EPI\_ISL\_425581 -----  
EPI\_ISL\_426881 -----  
EPI\_ISL\_426883 -----  
EPI\_ISL\_426888 -----  
EPI\_ISL\_426900 -----  
EPI\_ISL\_426901 -----  
EPI\_ISL\_426903 -----  
EPI\_ISL\_426904 -----  
EPI\_ISL\_426907 -----  
EPI\_ISL\_426910 -----



ORF1ab 4801 TVKPGNFKDFYDFAVSKGFFKEGSSVELKHFFFAQDGNAAISDYDYRYNLPMTCDIRQ  
EPI\_ISL\_413575 -----  
EPI\_ISL\_413588 -----  
EPI\_ISL\_413589 -----  
EPI\_ISL\_424221 -----  
EPI\_ISL\_424233 -----  
EPI\_ISL\_424236 -----  
EPI\_ISL\_424238 -----  
EPI\_ISL\_424248 -----  
EPI\_ISL\_424254 -----  
EPI\_ISL\_425548 -----  
EPI\_ISL\_425581 -----  
EPI\_ISL\_426881 -----  
EPI\_ISL\_426883 -----  
EPI\_ISL\_426888 -----  
EPI\_ISL\_426900 -----  
EPI\_ISL\_426901 -----  
EPI\_ISL\_426903 -----  
EPI\_ISL\_426904 -----  
EPI\_ISL\_426907 -----  
EPI\_ISL\_426910 -----  
ORF1ab 4801 TVKPGNFKDFYDFAVSKGFFKEGSSVELKHFFFAQDGNAAISDYDYRYNLPMTCDIRQ  
EPI\_ISL\_413575 -----  
EPI\_ISL\_413588 -----  
EPI\_ISL\_413589 -----  
EPI\_ISL\_424221 -----  
EPI\_ISL\_424233 -----  
EPI\_ISL\_424236 -----  
EPI\_ISL\_424238 -----  
EPI\_ISL\_424248 -----  
EPI\_ISL\_424254 -----  
EPI\_ISL\_425548 -----  
EPI\_ISL\_425581 -----  
EPI\_ISL\_426881 -----  
EPI\_ISL\_426883 -----  
EPI\_ISL\_426888 -----  
EPI\_ISL\_426900 -----  
EPI\_ISL\_426901 -----  
EPI\_ISL\_426903 -----  
EPI\_ISL\_426904 -----  
EPI\_ISL\_426907 -----  
EPI\_ISL\_426910 -----

ORF1ab 4861 LLFVVEVVDKYFDCYDGGCINANQVIVNNLDKSAGFPFNKWKARLYYDSMSYEDQDALF  
EPI\_ISL\_413575 -----  
EPI\_ISL\_413588 -----  
EPI\_ISL\_413589 -----  
EPI\_ISL\_424221 -----  
EPI\_ISL\_424233 -----  
EPI\_ISL\_424236 -----  
EPI\_ISL\_424238 -----  
EPI\_ISL\_424248 -----  
EPI\_ISL\_424254 -----  
EPI\_ISL\_425548 -----  
EPI\_ISL\_425581 -----  
EPI\_ISL\_426881 -----  
EPI\_ISL\_426883 -----  
EPI\_ISL\_426888 -----  
EPI\_ISL\_426900 -----  
EPI\_ISL\_426901 -----  
EPI\_ISL\_426903 -----  
EPI\_ISL\_426904 -----  
EPI\_ISL\_426907 -----  
EPI\_ISL\_426910 -----  
ORF1ab 4861 LLFVVEVVDKYFDCYDGGCINANQVIVNNLDKSAGFPFNKWKARLYYDSMSYEDQDALF  
EPI\_ISL\_413575 -----  
EPI\_ISL\_413588 -----  
EPI\_ISL\_413589 -----  
EPI\_ISL\_424221 -----  
EPI\_ISL\_424233 -----  
EPI\_ISL\_424236 -----  
EPI\_ISL\_424238 -----  
EPI\_ISL\_424248 -----  
EPI\_ISL\_424254 -----  
EPI\_ISL\_425548 -----  
EPI\_ISL\_425581 -----  
EPI\_ISL\_426881 -----  
EPI\_ISL\_426883 -----  
EPI\_ISL\_426888 -----  
EPI\_ISL\_426900 -----  
EPI\_ISL\_426901 -----  
EPI\_ISL\_426903 -----  
EPI\_ISL\_426904 -----  
EPI\_ISL\_426907 -----  
EPI\_ISL\_426910 -----

ORF1ab 4921 AYTKRNVIPITITQMNLYAISAKNRARTVAGVSICTMTNRQFHQKLLKLSIAATRGATVV  
EPI\_ISL\_413575 -----  
EPI\_ISL\_413588 -----  
EPI\_ISL\_413589 -----  
EPI\_ISL\_424221 -----  
EPI\_ISL\_424233 -----  
EPI\_ISL\_424236 -----  
EPI\_ISL\_424238 -----  
EPI\_ISL\_424248 -----  
EPI\_ISL\_424254 -----  
EPI\_ISL\_425548 -----  
EPI\_ISL\_425581 -----  
EPI\_ISL\_426881 -----  
EPI\_ISL\_426883 -----  
EPI\_ISL\_426888 -----  
EPI\_ISL\_426900 -----  
EPI\_ISL\_426901 -----  
EPI\_ISL\_426903 -----  
EPI\_ISL\_426904 -----  
EPI\_ISL\_426907 -----  
EPI\_ISL\_426910 -----  
ORF1ab 4921 AYTKRNVIPITITQMNLYAISAKNRARTVAGVSICTMTNRQFHQKLLKLSIAATRGATVV  
EPI\_ISL\_413575 -----  
EPI\_ISL\_413588 -----  
EPI\_ISL\_413589 -----  
EPI\_ISL\_424221 -----  
EPI\_ISL\_424233 -----  
EPI\_ISL\_424236 -----  
EPI\_ISL\_424238 -----  
EPI\_ISL\_424248 -----  
EPI\_ISL\_424254 -----  
EPI\_ISL\_425548 -----  
EPI\_ISL\_425581 -----  
EPI\_ISL\_426881 -----  
EPI\_ISL\_426883 -----  
EPI\_ISL\_426888 -----  
EPI\_ISL\_426900 -----  
EPI\_ISL\_426901 -----  
EPI\_ISL\_426903 -----  
EPI\_ISL\_426904 -----  
EPI\_ISL\_426907 -----  
EPI\_ISL\_426910 -----

```
ORF1ab          4981 IGTSKIFYGGWHNMLKTVYSDVENPHLMGWDYPKCDRAMPNMLRIMASLVLARKHTTCCSL
EPI_ISL_413575 -----
EPI_ISL_413588 -----
EPI_ISL_413589 -----
EPI_ISL_424221 -----
EPI_ISL_424233 -----
EPI_ISL_424236 -----
EPI_ISL_424238 -----
EPI_ISL_424248 -----
EPI_ISL_424254 -----
EPI_ISL_425548 -----
EPI_ISL_425581 -----
EPI_ISL_426881 -----
EPI_ISL_426883 -----
EPI_ISL_426888 -----
EPI_ISL_426900 -----
EPI_ISL_426901 -----
EPI_ISL_426903 -----
EPI_ISL_426904 -----
EPI_ISL_426907 -----
EPI_ISL_426910 -----
ORF1ab          4981 IGTSKIFYGGWHNMLKTVYSDVENPHLMGWDYPKCDRAMPNMLRIMASLVLARKHTTCCSL
EPI_ISL_413575 -----
EPI_ISL_413588 -----
EPI_ISL_413589 -----
EPI_ISL_424221 -----
EPI_ISL_424233 -----
EPI_ISL_424236 -----
EPI_ISL_424238 -----
EPI_ISL_424248 -----
EPI_ISL_424254 -----
EPI_ISL_425548 -----
EPI_ISL_425581 -----
EPI_ISL_426881 -----
EPI_ISL_426883 -----
EPI_ISL_426888 -----
EPI_ISL_426900 -----
EPI_ISL_426901 -----
EPI_ISL_426903 -----
EPI_ISL_426904 -----
EPI_ISL_426907 -----
EPI_ISL_426910 -----
```

ORF1ab 5041 SHRFYRLANECAQVLSEMVMCGGSLYVKPGGTSSGDATTAYANSVFNICQAVTANVNALL  
EPI\_ISL\_413575 -----  
EPI\_ISL\_413588 -----  
EPI\_ISL\_413589 -----  
EPI\_ISL\_424221 -----  
EPI\_ISL\_424233 -----  
EPI\_ISL\_424236 -----  
EPI\_ISL\_424238 -----  
EPI\_ISL\_424248 -----  
EPI\_ISL\_424254 -----  
EPI\_ISL\_425548 -----  
EPI\_ISL\_425581 -----  
EPI\_ISL\_426881 -----  
EPI\_ISL\_426883 -----  
EPI\_ISL\_426888 -----  
EPI\_ISL\_426900 -----  
EPI\_ISL\_426901 -----  
EPI\_ISL\_426903 -----  
EPI\_ISL\_426904 -----  
EPI\_ISL\_426907 -----  
EPI\_ISL\_426910 -----  
ORF1ab 5041 SHRFYRLANECAQVLSEMVMCGGSLYVKPGGTSSGDATTAYANSVFNICQAVTANVNALL  
EPI\_ISL\_413575 -----  
EPI\_ISL\_413588 -----  
EPI\_ISL\_413589 -----  
EPI\_ISL\_424221 -----  
EPI\_ISL\_424233 -----  
EPI\_ISL\_424236 -----  
EPI\_ISL\_424238 -----  
EPI\_ISL\_424248 -----  
EPI\_ISL\_424254 -----  
EPI\_ISL\_425548 -----  
EPI\_ISL\_425581 -----  
EPI\_ISL\_426881 -----  
EPI\_ISL\_426883 -----  
EPI\_ISL\_426888 -----  
EPI\_ISL\_426900 -----  
EPI\_ISL\_426901 -----  
EPI\_ISL\_426903 -----  
EPI\_ISL\_426904 -----  
EPI\_ISL\_426907 -----  
EPI\_ISL\_426910 -----

ORF1ab 5101 STDGNKIADKYVRNLQHRLYECLYRNRDVDTDFVNEFYAYLRKHFSMMILSDDAVVCFNS  
EPI\_ISL\_413575 -----  
EPI\_ISL\_413588 -----  
EPI\_ISL\_413589 -----  
EPI\_ISL\_424221 -----  
EPI\_ISL\_424233 -----  
EPI\_ISL\_424236 -----  
EPI\_ISL\_424238 -----  
EPI\_ISL\_424248 -----  
EPI\_ISL\_424254 -----  
EPI\_ISL\_425548 -----  
EPI\_ISL\_425581 -----  
EPI\_ISL\_426881 -----  
EPI\_ISL\_426883 -----  
EPI\_ISL\_426888 -----  
EPI\_ISL\_426900 -----  
EPI\_ISL\_426901 -----  
EPI\_ISL\_426903 -----  
EPI\_ISL\_426904 -----  
EPI\_ISL\_426907 -----  
EPI\_ISL\_426910 -----  
ORF1ab 5101 STDGNKIADKYVRNLQHRLYECLYRNRDVDTDFVNEFYAYLRKHFSMMILSDDAVVCFNS  
EPI\_ISL\_413575 -----  
EPI\_ISL\_413588 -----  
EPI\_ISL\_413589 -----  
EPI\_ISL\_424221 -----  
EPI\_ISL\_424233 -----  
EPI\_ISL\_424236 -----  
EPI\_ISL\_424238 -----  
EPI\_ISL\_424248 -----  
EPI\_ISL\_424254 -----  
EPI\_ISL\_425548 -----  
EPI\_ISL\_425581 -----  
EPI\_ISL\_426881 -----  
EPI\_ISL\_426883 -----  
EPI\_ISL\_426888 -----  
EPI\_ISL\_426900 -----  
EPI\_ISL\_426901 -----  
EPI\_ISL\_426903 -----  
EPI\_ISL\_426904 -----  
EPI\_ISL\_426907 -----  
EPI\_ISL\_426910 -----

```
ORF1ab          5161 TYASQGLVASIKNFKSVLYYQNNVFMSEAKCWTETDLTKGPHEFCSQHTMLVKQGDDYVY
EPI_ISL_413575 -----
EPI_ISL_413588 -----
EPI_ISL_413589 -----
EPI_ISL_424221 -----
EPI_ISL_424233 -----
EPI_ISL_424236 -----
EPI_ISL_424238 -----
EPI_ISL_424248 -----
EPI_ISL_424254 -----
EPI_ISL_425548 -----
EPI_ISL_425581 -----
EPI_ISL_426881 -----
EPI_ISL_426883 -----
EPI_ISL_426888 -----
EPI_ISL_426900 -----
EPI_ISL_426901 -----
EPI_ISL_426903 -----
EPI_ISL_426904 -----
EPI_ISL_426907 -----
EPI_ISL_426910 -----
ORF1ab          5161 TYASQGLVASIKNFKSVLYYQNNVFMSEAKCWTETDLTKGPHEFCSQHTMLVKQGDDYVY
EPI_ISL_413575 -----
EPI_ISL_413588 -----
EPI_ISL_413589 -----
EPI_ISL_424221 -----
EPI_ISL_424233 -----
EPI_ISL_424236 -----
EPI_ISL_424238 -----
EPI_ISL_424248 -----
EPI_ISL_424254 -----
EPI_ISL_425548 -----
EPI_ISL_425581 -----
EPI_ISL_426881 -----
EPI_ISL_426883 -----
EPI_ISL_426888 -----
EPI_ISL_426900 -----
EPI_ISL_426901 -----
EPI_ISL_426903 -----
EPI_ISL_426904 -----
EPI_ISL_426907 -----
EPI_ISL_426910 -----
```

ORF1ab 5221 LPYPDPSRILGAGCFVDDIVKTDGTLMIERFVSLAIDAYPLTKHPNQEYADVFLHLYLQYI  
EPI\_ISL\_413575 -----  
EPI\_ISL\_413588 -----  
EPI\_ISL\_413589 -----  
EPI\_ISL\_424221 -----  
EPI\_ISL\_424233 -----  
EPI\_ISL\_424236 -----  
EPI\_ISL\_424238 -----  
EPI\_ISL\_424248 -----  
EPI\_ISL\_424254 -----  
EPI\_ISL\_425548 -----  
EPI\_ISL\_425581 -----  
EPI\_ISL\_426881 -----  
EPI\_ISL\_426883 -----  
EPI\_ISL\_426888 -----  
EPI\_ISL\_426900 -----  
EPI\_ISL\_426901 -----  
EPI\_ISL\_426903 -----  
EPI\_ISL\_426904 -----  
EPI\_ISL\_426907 -----  
EPI\_ISL\_426910 -----  
ORF1ab 5221 LPYPDPSRILGAGCFVDDIVKTDGTLMIERFVSLAIDAYPLTKHPNQEYADVFLHLYLQYI  
EPI\_ISL\_413575 -----  
EPI\_ISL\_413588 -----  
EPI\_ISL\_413589 -----  
EPI\_ISL\_424221 -----  
EPI\_ISL\_424233 -----  
EPI\_ISL\_424236 -----  
EPI\_ISL\_424238 -----  
EPI\_ISL\_424248 -----  
EPI\_ISL\_424254 -----  
EPI\_ISL\_425548 -----  
EPI\_ISL\_425581 -----  
EPI\_ISL\_426881 -----  
EPI\_ISL\_426883 -----  
EPI\_ISL\_426888 -----  
EPI\_ISL\_426900 -----  
EPI\_ISL\_426901 -----  
EPI\_ISL\_426903 -----  
EPI\_ISL\_426904 -----  
EPI\_ISL\_426907 -----  
EPI\_ISL\_426910 -----



ORF1ab 5281 RKLHDELGTGHMLDMYSVMLTNDNTSRYWEPEFYEAMYTPHTVLQAVGACVLCNSQTSLRC  
EPI\_ISL\_413575 -----  
EPI\_ISL\_413588 -----  
EPI\_ISL\_413589 -----  
EPI\_ISL\_424221 -----  
EPI\_ISL\_424233 -----  
EPI\_ISL\_424236 -----  
EPI\_ISL\_424238 -----  
EPI\_ISL\_424248 -----  
EPI\_ISL\_424254 -----  
EPI\_ISL\_425548 -----  
EPI\_ISL\_425581 -----  
EPI\_ISL\_426881 -----  
EPI\_ISL\_426883 -----  
EPI\_ISL\_426888 -----  
EPI\_ISL\_426900 -----  
EPI\_ISL\_426901 -----  
EPI\_ISL\_426903 -----  
EPI\_ISL\_426904 -----  
EPI\_ISL\_426907 -----  
EPI\_ISL\_426910 -----  
ORF1ab 5281 RKLHDELGTGHMLDMYSVMLTNDNTSRYWEPEFYEAMYTPHTVLQAVGACVLCNSQTSLRC  
EPI\_ISL\_413575 -----  
EPI\_ISL\_413588 -----  
EPI\_ISL\_413589 -----  
EPI\_ISL\_424221 -----  
EPI\_ISL\_424233 -----  
EPI\_ISL\_424236 -----  
EPI\_ISL\_424238 -----  
EPI\_ISL\_424248 -----  
EPI\_ISL\_424254 -----  
EPI\_ISL\_425548 -----  
EPI\_ISL\_425581 -----  
EPI\_ISL\_426881 -----  
EPI\_ISL\_426883 -----  
EPI\_ISL\_426888 -----  
EPI\_ISL\_426900 -----  
EPI\_ISL\_426901 -----  
EPI\_ISL\_426903 -----  
EPI\_ISL\_426904 -----  
EPI\_ISL\_426907 -----  
EPI\_ISL\_426910 -----

ORF1ab 5341 GACIRRPFLCCKCCYDHVISTSHKLVLVSVNPYVCNAPGCDVTDVTDVTLQYLGGMSYYCKSHK  
EPI\_ISL\_413575 -----  
EPI\_ISL\_413588 -----  
EPI\_ISL\_413589 -----  
EPI\_ISL\_424221 -----  
EPI\_ISL\_424233 -----  
EPI\_ISL\_424236 -----  
EPI\_ISL\_424238 -----  
EPI\_ISL\_424248 -----  
EPI\_ISL\_424254 -----  
EPI\_ISL\_425548 -----  
EPI\_ISL\_425581 -----  
EPI\_ISL\_426881 -----  
EPI\_ISL\_426883 -----  
EPI\_ISL\_426888 -----  
EPI\_ISL\_426900 -----  
EPI\_ISL\_426901 -----  
EPI\_ISL\_426903 -----  
EPI\_ISL\_426904 -----  
EPI\_ISL\_426907 -----  
EPI\_ISL\_426910 -----  
ORF1ab 5341 GACIRRPFLCCKCCYDHVISTSHKLVLVSVNPYVCNAPGCDVTDVTDVTLQYLGGMSYYCKSHK  
EPI\_ISL\_413575 -----  
EPI\_ISL\_413588 -----  
EPI\_ISL\_413589 -----  
EPI\_ISL\_424221 -----  
EPI\_ISL\_424233 -----  
EPI\_ISL\_424236 -----  
EPI\_ISL\_424238 -----  
EPI\_ISL\_424248 -----  
EPI\_ISL\_424254 -----  
EPI\_ISL\_425548 -----  
EPI\_ISL\_425581 -----  
EPI\_ISL\_426881 -----  
EPI\_ISL\_426883 -----  
EPI\_ISL\_426888 -----  
EPI\_ISL\_426900 -----  
EPI\_ISL\_426901 -----  
EPI\_ISL\_426903 -----  
EPI\_ISL\_426904 -----  
EPI\_ISL\_426907 -----  
EPI\_ISL\_426910 -----

ORF1ab 5401 PPISFPLCANGQVFGLYKNTCVGSDNVTDFNAIATCDWTNAGDYILANTCTERLKLFAAE  
EPI\_ISL\_413575 -----  
EPI\_ISL\_413588 -----  
EPI\_ISL\_413589 -----  
EPI\_ISL\_424221 -----  
EPI\_ISL\_424233 -----  
EPI\_ISL\_424236 -----  
EPI\_ISL\_424238 -----  
EPI\_ISL\_424248 -----  
EPI\_ISL\_424254 -----  
EPI\_ISL\_425548 -----  
EPI\_ISL\_425581 -----  
EPI\_ISL\_426881 -----  
EPI\_ISL\_426883 -----  
EPI\_ISL\_426888 -----  
EPI\_ISL\_426900 -----  
EPI\_ISL\_426901 -----  
EPI\_ISL\_426903 -----  
EPI\_ISL\_426904 -----  
EPI\_ISL\_426907 -----  
EPI\_ISL\_426910 -----  
ORF1ab 5401 PPISFPLCANGQVFGLYKNTCVGSDNVTDFNAIATCDWTNAGDYILANTCTERLKLFAAE  
EPI\_ISL\_413575 -----  
EPI\_ISL\_413588 -----  
EPI\_ISL\_413589 -----  
EPI\_ISL\_424221 -----  
EPI\_ISL\_424233 -----  
EPI\_ISL\_424236 -----  
EPI\_ISL\_424238 -----  
EPI\_ISL\_424248 -----  
EPI\_ISL\_424254 -----  
EPI\_ISL\_425548 -----  
EPI\_ISL\_425581 -----  
EPI\_ISL\_426881 -----  
EPI\_ISL\_426883 -----  
EPI\_ISL\_426888 -----  
EPI\_ISL\_426900 -----  
EPI\_ISL\_426901 -----  
EPI\_ISL\_426903 -----  
EPI\_ISL\_426904 -----  
EPI\_ISL\_426907 -----  
EPI\_ISL\_426910 -----

ORF1ab 5461 TLKATEETFKLSYGIATVREVLSDRELHLSWEVGKPRPPLNRNYVFTGYRVTKNSKVQIG  
EPI\_ISL\_413575 -----  
EPI\_ISL\_413588 -----  
EPI\_ISL\_413589 -----  
EPI\_ISL\_424221 -----  
EPI\_ISL\_424233 -----  
EPI\_ISL\_424236 -----  
EPI\_ISL\_424238 -----  
EPI\_ISL\_424248 -----  
EPI\_ISL\_424254 -----  
EPI\_ISL\_425548 -----  
EPI\_ISL\_425581 -----  
EPI\_ISL\_426881 -----  
EPI\_ISL\_426883 -----  
EPI\_ISL\_426888 -----  
EPI\_ISL\_426900 -----  
EPI\_ISL\_426901 -----  
EPI\_ISL\_426903 -----  
EPI\_ISL\_426904 -----  
EPI\_ISL\_426907 -----  
EPI\_ISL\_426910 -----  
ORF1ab 5461 TLKATEETFKLSYGIATVREVLSDRELHLSWEVGKPRPPLNRNYVFTGYRVTKNSKVQIG  
EPI\_ISL\_413575 -----  
EPI\_ISL\_413588 -----  
EPI\_ISL\_413589 -----  
EPI\_ISL\_424221 -----  
EPI\_ISL\_424233 -----  
EPI\_ISL\_424236 -----  
EPI\_ISL\_424238 -----  
EPI\_ISL\_424248 -----  
EPI\_ISL\_424254 -----  
EPI\_ISL\_425548 -----  
EPI\_ISL\_425581 -----  
EPI\_ISL\_426881 -----  
EPI\_ISL\_426883 -----  
EPI\_ISL\_426888 -----  
EPI\_ISL\_426900 -----  
EPI\_ISL\_426901 -----  
EPI\_ISL\_426903 -----  
EPI\_ISL\_426904 -----  
EPI\_ISL\_426907 -----  
EPI\_ISL\_426910 -----

```
ORF1ab          5521 EYTFEKGDYGDVAVYRGTTTTYKLVNGDYFVLTSHTVMPLSAPTLVLPQEHYVRITGLYPTL
EPI_ISL_413575 -----
EPI_ISL_413588 -----
EPI_ISL_413589 -----
EPI_ISL_424221 -----
EPI_ISL_424233 -----
EPI_ISL_424236 -----
EPI_ISL_424238 -----
EPI_ISL_424248 -----
EPI_ISL_424254 -----
EPI_ISL_425548 -----
EPI_ISL_425581 -----
EPI_ISL_426881 -----
EPI_ISL_426883 -----
EPI_ISL_426888 -----
EPI_ISL_426900 -----
EPI_ISL_426901 -----
EPI_ISL_426903 -----
EPI_ISL_426904 -----
EPI_ISL_426907 -----
EPI_ISL_426910 -----
ORF1ab          5521 EYTFEKGDYGDVAVYRGTTTTYKLVNGDYFVLTSHTVMPLSAPTLVLPQEHYVRITGLYPTL
EPI_ISL_413575 -----
EPI_ISL_413588 -----
EPI_ISL_413589 -----
EPI_ISL_424221 -----
EPI_ISL_424233 -----
EPI_ISL_424236 -----
EPI_ISL_424238 -----
EPI_ISL_424248 -----
EPI_ISL_424254 -----
EPI_ISL_425548 -----
EPI_ISL_425581 -----
EPI_ISL_426881 -----
EPI_ISL_426883 -----
EPI_ISL_426888 -----
EPI_ISL_426900 -----
EPI_ISL_426901 -----
EPI_ISL_426903 -----
EPI_ISL_426904 -----
EPI_ISL_426907 -----
EPI_ISL_426910 -----
```

ORF1ab 5581 NISDEFSSNVANYQKVGMQKYSTLQGPPGTGKSHFAIGLALYYPSARIVYTACSHAAVDA  
EPI\_ISL\_413575 -----  
EPI\_ISL\_413588 -----  
EPI\_ISL\_413589 -----  
EPI\_ISL\_424221 -----  
EPI\_ISL\_424233 -----  
EPI\_ISL\_424236 -----  
EPI\_ISL\_424238 -----  
EPI\_ISL\_424248 -----  
EPI\_ISL\_424254 -----  
EPI\_ISL\_425548 -----  
EPI\_ISL\_425581 -----  
EPI\_ISL\_426881 -----  
EPI\_ISL\_426883 -----  
EPI\_ISL\_426888 -----  
EPI\_ISL\_426900 -----  
EPI\_ISL\_426901 -----  
EPI\_ISL\_426903 -----  
EPI\_ISL\_426904 -----  
EPI\_ISL\_426907 -----  
EPI\_ISL\_426910 -----  
ORF1ab 5581 NISDEFSSNVANYQKVGMQKYSTLQGPPGTGKSHFAIGLALYYPSARIVYTACSHAAVDA  
EPI\_ISL\_413575 -----  
EPI\_ISL\_413588 -----  
EPI\_ISL\_413589 -----  
EPI\_ISL\_424221 -----  
EPI\_ISL\_424233 -----  
EPI\_ISL\_424236 -----  
EPI\_ISL\_424238 -----  
EPI\_ISL\_424248 -----  
EPI\_ISL\_424254 -----  
EPI\_ISL\_425548 -----  
EPI\_ISL\_425581 -----  
EPI\_ISL\_426881 -----  
EPI\_ISL\_426883 -----  
EPI\_ISL\_426888 -----  
EPI\_ISL\_426900 -----  
EPI\_ISL\_426901 -----  
EPI\_ISL\_426903 -----  
EPI\_ISL\_426904 -----  
EPI\_ISL\_426907 -----  
EPI\_ISL\_426910 -----

ORF1ab 5641 LCEKALKYLPIDKCSRIIPARARVECFDKFKVNSTLEQYVFCTVNALPETTADIVVFDEI  
EPI\_ISL\_413575 -----  
EPI\_ISL\_413588 -----  
EPI\_ISL\_413589 -----  
EPI\_ISL\_424221 -----  
EPI\_ISL\_424233 -----  
EPI\_ISL\_424236 -----  
EPI\_ISL\_424238 -----  
EPI\_ISL\_424248 -----  
EPI\_ISL\_424254 -----  
EPI\_ISL\_425548 -----  
EPI\_ISL\_425581 -----  
EPI\_ISL\_426881 -----  
EPI\_ISL\_426883 -----  
EPI\_ISL\_426888 -----  
EPI\_ISL\_426900 -----  
EPI\_ISL\_426901 -----  
EPI\_ISL\_426903 -----  
EPI\_ISL\_426904 -----  
EPI\_ISL\_426907 -----  
EPI\_ISL\_426910 -----  
ORF1ab 5641 LCEKALKYLPIDKCSRIIPARARVECFDKFKVNSTLEQYVFCTVNALPETTADIVVFDEI  
EPI\_ISL\_413575 -----  
EPI\_ISL\_413588 -----  
EPI\_ISL\_413589 -----  
EPI\_ISL\_424221 -----  
EPI\_ISL\_424233 -----  
EPI\_ISL\_424236 -----  
EPI\_ISL\_424238 -----  
EPI\_ISL\_424248 -----  
EPI\_ISL\_424254 -----  
EPI\_ISL\_425548 -----  
EPI\_ISL\_425581 -----  
EPI\_ISL\_426881 -----  
EPI\_ISL\_426883 -----  
EPI\_ISL\_426888 -----  
EPI\_ISL\_426900 -----  
EPI\_ISL\_426901 -----  
EPI\_ISL\_426903 -----  
EPI\_ISL\_426904 -----  
EPI\_ISL\_426907 -----  
EPI\_ISL\_426910 -----

ORF1ab 5701 SMATNYDLSVNVNARLRAKHYVYIGDPAQLPAPRTLLTKGTLEPEYFNNSVCRLMKTIGPDM  
EPI\_ISL\_413575 -----  
EPI\_ISL\_413588 -----  
EPI\_ISL\_413589 -----  
EPI\_ISL\_424221 -----  
EPI\_ISL\_424233 -----  
EPI\_ISL\_424236 -----  
EPI\_ISL\_424238 -----  
EPI\_ISL\_424248 -----  
EPI\_ISL\_424254 -----  
EPI\_ISL\_425548 -----  
EPI\_ISL\_425581 -----  
EPI\_ISL\_426881 -----  
EPI\_ISL\_426883 -----  
EPI\_ISL\_426888 -----  
EPI\_ISL\_426900 -----  
EPI\_ISL\_426901 -----  
EPI\_ISL\_426903 -----  
EPI\_ISL\_426904 -----  
EPI\_ISL\_426907 -----  
EPI\_ISL\_426910 -----  
ORF1ab 5701 SMATNYDLSVNVNARLRAKHYVYIGDPAQLPAPRTLLTKGTLEPEYFNNSVCRLMKTIGPDM  
EPI\_ISL\_413575 -----  
EPI\_ISL\_413588 -----  
EPI\_ISL\_413589 -----  
EPI\_ISL\_424221 -----  
EPI\_ISL\_424233 -----  
EPI\_ISL\_424236 -----  
EPI\_ISL\_424238 -----  
EPI\_ISL\_424248 -----  
EPI\_ISL\_424254 -----  
EPI\_ISL\_425548 -----  
EPI\_ISL\_425581 -----  
EPI\_ISL\_426881 -----  
EPI\_ISL\_426883 -----  
EPI\_ISL\_426888 -----  
EPI\_ISL\_426900 -----  
EPI\_ISL\_426901 -----  
EPI\_ISL\_426903 -----  
EPI\_ISL\_426904 -----  
EPI\_ISL\_426907 -----  
EPI\_ISL\_426910 -----



ORF1ab 5761 FLGTCRRCPAEIVDTVSALVYDNKCLKAHKDKSAQCFKMFYKGVITHDVSSAINRPQIGVV  
EPI\_ISL\_413575 -----  
EPI\_ISL\_413588 -----  
EPI\_ISL\_413589 -----  
EPI\_ISL\_424221 -----  
EPI\_ISL\_424233 -----  
EPI\_ISL\_424236 -----  
EPI\_ISL\_424238 -----  
EPI\_ISL\_424248 -----  
EPI\_ISL\_424254 -----  
EPI\_ISL\_425548 -----  
EPI\_ISL\_425581 -----  
EPI\_ISL\_426881 -----  
EPI\_ISL\_426883 -----  
EPI\_ISL\_426888 -----  
EPI\_ISL\_426900 -----  
EPI\_ISL\_426901 -----  
EPI\_ISL\_426903 -----  
EPI\_ISL\_426904 -----  
EPI\_ISL\_426907 -----  
EPI\_ISL\_426910 -----  
ORF1ab 5761 FLGTCRRCPAEIVDTVSALVYDNKCLKAHKDKSAQCFKMFYKGVITHDVSSAINRPQIGVV  
EPI\_ISL\_413575 -----  
EPI\_ISL\_413588 -----  
EPI\_ISL\_413589 -----  
EPI\_ISL\_424221 -----  
EPI\_ISL\_424233 -----  
EPI\_ISL\_424236 -----  
EPI\_ISL\_424238 -----  
EPI\_ISL\_424248 -----  
EPI\_ISL\_424254 -----  
EPI\_ISL\_425548 -----  
EPI\_ISL\_425581 -----  
EPI\_ISL\_426881 -----  
EPI\_ISL\_426883 -----  
EPI\_ISL\_426888 -----  
EPI\_ISL\_426900 -----  
EPI\_ISL\_426901 -----  
EPI\_ISL\_426903 -----  
EPI\_ISL\_426904 -----  
EPI\_ISL\_426907 -----  
EPI\_ISL\_426910 -----

ORF1ab 5821 REFLTRNPAWRKAVFISPYNSQNAVASKILGLPTQTVDSSQGSEYDYVIFTQTETAHSC  
EPI\_ISL\_413575 -----  
EPI\_ISL\_413588 -----  
EPI\_ISL\_413589 -----  
EPI\_ISL\_424221 -----  
EPI\_ISL\_424233 -----  
EPI\_ISL\_424236 -----  
EPI\_ISL\_424238 -----  
EPI\_ISL\_424248 -----  
EPI\_ISL\_424254 -----  
EPI\_ISL\_425548 -----  
EPI\_ISL\_425581 -----  
EPI\_ISL\_426881 -----  
EPI\_ISL\_426883 -----  
EPI\_ISL\_426888 -----  
EPI\_ISL\_426900 -----  
EPI\_ISL\_426901 -----  
EPI\_ISL\_426903 -----  
EPI\_ISL\_426904 -----  
EPI\_ISL\_426907 -----  
EPI\_ISL\_426910 -----  
ORF1ab 5821 REFLTRNPAWRKAVFISPYNSQNAVASKILGLPTQTVDSSQGSEYDYVIFTQTETAHSC  
EPI\_ISL\_413575 -----  
EPI\_ISL\_413588 -----  
EPI\_ISL\_413589 -----  
EPI\_ISL\_424221 -----  
EPI\_ISL\_424233 -----  
EPI\_ISL\_424236 -----  
EPI\_ISL\_424238 -----  
EPI\_ISL\_424248 -----  
EPI\_ISL\_424254 -----  
EPI\_ISL\_425548 -----  
EPI\_ISL\_425581 -----  
EPI\_ISL\_426881 -----  
EPI\_ISL\_426883 -----  
EPI\_ISL\_426888 -----  
EPI\_ISL\_426900 -----  
EPI\_ISL\_426901 -----  
EPI\_ISL\_426903 -----  
EPI\_ISL\_426904 -----  
EPI\_ISL\_426907 -----  
EPI\_ISL\_426910 -----

ORF1ab 5881 NVNRFNVAITRAKVGILCIMSDRDLYDKLQFTSLEIPRRNVATLQAENVTGLFKDCSKVI  
EPI\_ISL\_413575 -----  
EPI\_ISL\_413588 -----  
EPI\_ISL\_413589 -----  
EPI\_ISL\_424221 -----  
EPI\_ISL\_424233 -----  
EPI\_ISL\_424236 -----  
EPI\_ISL\_424238 -----  
EPI\_ISL\_424248 -----  
EPI\_ISL\_424254 -----  
EPI\_ISL\_425548 -----  
EPI\_ISL\_425581 -----  
EPI\_ISL\_426881 -----  
EPI\_ISL\_426883 -----  
EPI\_ISL\_426888 -----  
EPI\_ISL\_426900 -----  
EPI\_ISL\_426901 -----  
EPI\_ISL\_426903 -----  
EPI\_ISL\_426904 -----  
EPI\_ISL\_426907 -----  
EPI\_ISL\_426910 -----  
ORF1ab 5881 NVNRFNVAITRAKVGILCIMSDRDLYDKLQFTSLEIPRRNVATLQAENVTGLFKDCSKVI  
EPI\_ISL\_413575 -----  
EPI\_ISL\_413588 -----  
EPI\_ISL\_413589 -----  
EPI\_ISL\_424221 -----  
EPI\_ISL\_424233 -----  
EPI\_ISL\_424236 -----  
EPI\_ISL\_424238 -----  
EPI\_ISL\_424248 -----  
EPI\_ISL\_424254 -----  
EPI\_ISL\_425548 -----  
EPI\_ISL\_425581 -----  
EPI\_ISL\_426881 -----  
EPI\_ISL\_426883 -----  
EPI\_ISL\_426888 -----  
EPI\_ISL\_426900 -----  
EPI\_ISL\_426901 -----  
EPI\_ISL\_426903 -----  
EPI\_ISL\_426904 -----  
EPI\_ISL\_426907 -----  
EPI\_ISL\_426910 -----

ORF1ab 5941 TGLHPTQAPTHLSVDTKFKTEGLCVDIPGIPKDMTYRRLISMMGFKMNYQVNGYPNMFIT  
EPI\_ISL\_413575 -----  
EPI\_ISL\_413588 -----  
EPI\_ISL\_413589 -----  
EPI\_ISL\_424221 -----  
EPI\_ISL\_424233 -----  
EPI\_ISL\_424236 -----  
EPI\_ISL\_424238 -----  
EPI\_ISL\_424248 -----  
EPI\_ISL\_424254 -----  
EPI\_ISL\_425548 -----  
EPI\_ISL\_425581 -----  
EPI\_ISL\_426881 -----  
EPI\_ISL\_426883 -----  
EPI\_ISL\_426888 -----  
EPI\_ISL\_426900 -----  
EPI\_ISL\_426901 -----  
EPI\_ISL\_426903 -----  
EPI\_ISL\_426904 -----  
EPI\_ISL\_426907 -----  
EPI\_ISL\_426910 -----  
ORF1ab 5941 TGLHPTQAPTHLSVDTKFKTEGLCVDIPGIPKDMTYRRLISMMGFKMNYQVNGYPNMFIT  
EPI\_ISL\_413575 -----  
EPI\_ISL\_413588 -----  
EPI\_ISL\_413589 -----  
EPI\_ISL\_424221 -----  
EPI\_ISL\_424233 -----  
EPI\_ISL\_424236 -----  
EPI\_ISL\_424238 -----  
EPI\_ISL\_424248 -----  
EPI\_ISL\_424254 -----  
EPI\_ISL\_425548 -----  
EPI\_ISL\_425581 -----  
EPI\_ISL\_426881 -----  
EPI\_ISL\_426883 -----  
EPI\_ISL\_426888 -----  
EPI\_ISL\_426900 -----  
EPI\_ISL\_426901 -----  
EPI\_ISL\_426903 -----  
EPI\_ISL\_426904 -----  
EPI\_ISL\_426907 -----  
EPI\_ISL\_426910 -----

```
ORF1ab          6001 REEAIHVRAWIGFDVEGCHATREAVGTNLPLQLGFSTGVNLVAVPTGYVDTPNNTDFSR
EPI_ISL_413575 -----
EPI_ISL_413588 -----
EPI_ISL_413589 -----
EPI_ISL_424221 -----
EPI_ISL_424233 -----
EPI_ISL_424236 -----
EPI_ISL_424238 -----
EPI_ISL_424248 -----
EPI_ISL_424254 -----
EPI_ISL_425548 -----
EPI_ISL_425581 -----
EPI_ISL_426881 -----
EPI_ISL_426883 -----
EPI_ISL_426888 -----
EPI_ISL_426900 -----
EPI_ISL_426901 -----
EPI_ISL_426903 -----
EPI_ISL_426904 -----
EPI_ISL_426907 -----
EPI_ISL_426910 -----
ORF1ab          6001 REEAIHVRAWIGFDVEGCHATREAVGTNLPLQLGFSTGVNLVAVPTGYVDTPNNTDFSR
EPI_ISL_413575 -----
EPI_ISL_413588 -----
EPI_ISL_413589 -----
EPI_ISL_424221 -----
EPI_ISL_424233 -----
EPI_ISL_424236 -----
EPI_ISL_424238 -----
EPI_ISL_424248 -----
EPI_ISL_424254 -----
EPI_ISL_425548 -----
EPI_ISL_425581 -----
EPI_ISL_426881 -----
EPI_ISL_426883 -----
EPI_ISL_426888 -----
EPI_ISL_426900 -----
EPI_ISL_426901 -----
EPI_ISL_426903 -----
EPI_ISL_426904 -----
EPI_ISL_426907 -----
EPI_ISL_426910 -----
```

ORFlab 6061 VSAKPPPGDQFKHLIPLMYKGLPWNVVRKIVQMLSDTLKNLSDRVVFVLWAHGFELTSM  
EPI\_ISL\_413575 -----  
EPI\_ISL\_413588 -----  
EPI\_ISL\_413589 -----  
EPI\_ISL\_424221 -----  
EPI\_ISL\_424233 -----  
EPI\_ISL\_424236 -----  
EPI\_ISL\_424238 -----  
EPI\_ISL\_424248 -----  
EPI\_ISL\_424254 -----  
EPI\_ISL\_425548 -----  
EPI\_ISL\_425581 -----  
EPI\_ISL\_426881 -----  
EPI\_ISL\_426883 -----  
EPI\_ISL\_426888 -----  
EPI\_ISL\_426900 -----  
EPI\_ISL\_426901 -----  
EPI\_ISL\_426903 -----  
EPI\_ISL\_426904 -----  
EPI\_ISL\_426907 -----  
EPI\_ISL\_426910 -----  
ORFlab 6061 VSAKPPPGDQFKHLIPLMYKGLPWNVVRKIVQMLSDTLKNLSDRVVFVLWAHGFELTSM  
EPI\_ISL\_413575 -----  
EPI\_ISL\_413588 -----  
EPI\_ISL\_413589 -----  
EPI\_ISL\_424221 -----  
EPI\_ISL\_424233 -----  
EPI\_ISL\_424236 -----  
EPI\_ISL\_424238 -----  
EPI\_ISL\_424248 -----  
EPI\_ISL\_424254 -----  
EPI\_ISL\_425548 -----  
EPI\_ISL\_425581 -----  
EPI\_ISL\_426881 -----  
EPI\_ISL\_426883 -----  
EPI\_ISL\_426888 -----  
EPI\_ISL\_426900 -----  
EPI\_ISL\_426901 -----  
EPI\_ISL\_426903 -----  
EPI\_ISL\_426904 -----  
EPI\_ISL\_426907 -----  
EPI\_ISL\_426910 -----

ORF1ab 6121 KYFVKIGPERTCCLCDRRATCFSTASDTYACWHHSIGFDYVYNPFMIDVQQWGFTGNLQS  
EPI\_ISL\_413575 -----  
EPI\_ISL\_413588 -----  
EPI\_ISL\_413589 -----  
EPI\_ISL\_424221 -----  
EPI\_ISL\_424233 -----  
EPI\_ISL\_424236 -----  
EPI\_ISL\_424238 -----  
EPI\_ISL\_424248 -----  
EPI\_ISL\_424254 -----  
EPI\_ISL\_425548 -----  
EPI\_ISL\_425581 -----  
EPI\_ISL\_426881 -----  
EPI\_ISL\_426883 -----  
EPI\_ISL\_426888 -----  
EPI\_ISL\_426900 -----  
EPI\_ISL\_426901 -----  
EPI\_ISL\_426903 -----  
EPI\_ISL\_426904 -----  
EPI\_ISL\_426907 -----  
EPI\_ISL\_426910 -----  
ORF1ab 6121 KYFVKIGPERTCCLCDRRATCFSTASDTYACWHHSIGFDYVYNPFMIDVQQWGFTGNLQS  
EPI\_ISL\_413575 -----  
EPI\_ISL\_413588 -----  
EPI\_ISL\_413589 -----  
EPI\_ISL\_424221 -----  
EPI\_ISL\_424233 -----  
EPI\_ISL\_424236 -----  
EPI\_ISL\_424238 -----  
EPI\_ISL\_424248 -----  
EPI\_ISL\_424254 -----  
EPI\_ISL\_425548 -----  
EPI\_ISL\_425581 -----  
EPI\_ISL\_426881 -----  
EPI\_ISL\_426883 -----  
EPI\_ISL\_426888 -----  
EPI\_ISL\_426900 -----  
EPI\_ISL\_426901 -----  
EPI\_ISL\_426903 -----  
EPI\_ISL\_426904 -----  
EPI\_ISL\_426907 -----  
EPI\_ISL\_426910 -----

ORF1ab 6181 NHDLYCQVHGNAHVASCDAIMTRCLAVHECFVKRVDWTIEYPIIGDELKINAACRKVQHM  
EPI\_ISL\_413575 -----  
EPI\_ISL\_413588 -----  
EPI\_ISL\_413589 -----  
EPI\_ISL\_424221 -----  
EPI\_ISL\_424233 -----  
EPI\_ISL\_424236 -----  
EPI\_ISL\_424238 -----  
EPI\_ISL\_424248 -----  
EPI\_ISL\_424254 -----  
EPI\_ISL\_425548 -----  
EPI\_ISL\_425581 -----  
EPI\_ISL\_426881 -----  
EPI\_ISL\_426883 -----  
EPI\_ISL\_426888 -----  
EPI\_ISL\_426900 -----  
EPI\_ISL\_426901 -----  
EPI\_ISL\_426903 -----  
EPI\_ISL\_426904 -----  
EPI\_ISL\_426907 -----  
EPI\_ISL\_426910 -----  
ORF1ab 6181 NHDLYCQVHGNAHVASCDAIMTRCLAVHECFVKRVDWTIEYPIIGDELKINAACRKVQHM  
EPI\_ISL\_413575 -----  
EPI\_ISL\_413588 -----  
EPI\_ISL\_413589 -----  
EPI\_ISL\_424221 -----  
EPI\_ISL\_424233 -----  
EPI\_ISL\_424236 -----  
EPI\_ISL\_424238 -----  
EPI\_ISL\_424248 -----  
EPI\_ISL\_424254 -----  
EPI\_ISL\_425548 -----  
EPI\_ISL\_425581 -----  
EPI\_ISL\_426881 -----  
EPI\_ISL\_426883 -----  
EPI\_ISL\_426888 -----  
EPI\_ISL\_426900 -----  
EPI\_ISL\_426901 -----  
EPI\_ISL\_426903 -----  
EPI\_ISL\_426904 -----  
EPI\_ISL\_426907 -----  
EPI\_ISL\_426910 -----



ORF1ab 6241 VVKAALLADKFPVLHDIGNPKAIKCVQADVEWKFYDAQPCSDKAYKIEELFYASYATHSD  
EPI\_ISL\_413575 -----  
EPI\_ISL\_413588 -----  
EPI\_ISL\_413589 -----  
EPI\_ISL\_424221 -----  
EPI\_ISL\_424233 -----  
EPI\_ISL\_424236 -----  
EPI\_ISL\_424238 -----  
EPI\_ISL\_424248 -----  
EPI\_ISL\_424254 -----  
EPI\_ISL\_425548 -----  
EPI\_ISL\_425581 -----  
EPI\_ISL\_426881 -----  
EPI\_ISL\_426883 -----  
EPI\_ISL\_426888 -----  
EPI\_ISL\_426900 -----  
EPI\_ISL\_426901 -----  
EPI\_ISL\_426903 -----  
EPI\_ISL\_426904 -----  
EPI\_ISL\_426907 -----  
EPI\_ISL\_426910 -----  
ORF1ab 6241 VVKAALLADKFPVLHDIGNPKAIKCVQADVEWKFYDAQPCSDKAYKIEELFYASYATHSD  
EPI\_ISL\_413575 -----  
EPI\_ISL\_413588 -----  
EPI\_ISL\_413589 -----  
EPI\_ISL\_424221 -----  
EPI\_ISL\_424233 -----  
EPI\_ISL\_424236 -----  
EPI\_ISL\_424238 -----  
EPI\_ISL\_424248 -----  
EPI\_ISL\_424254 -----  
EPI\_ISL\_425548 -----  
EPI\_ISL\_425581 -----  
EPI\_ISL\_426881 -----  
EPI\_ISL\_426883 -----  
EPI\_ISL\_426888 -----  
EPI\_ISL\_426900 -----  
EPI\_ISL\_426901 -----  
EPI\_ISL\_426903 -----  
EPI\_ISL\_426904 -----  
EPI\_ISL\_426907 -----  
EPI\_ISL\_426910 -----

ORF1ab 6301 KFTDGVCLFWNCNVDRYPANSIVCRFDTRVLSNLNLPGCDGGSLYVVKHAFHTPAFDKSA  
EPI\_ISL\_413575 -----  
EPI\_ISL\_413588 -----  
EPI\_ISL\_413589 -----  
EPI\_ISL\_424221 -----  
EPI\_ISL\_424233 -----  
EPI\_ISL\_424236 -----  
EPI\_ISL\_424238 -----  
EPI\_ISL\_424248 -----  
EPI\_ISL\_424254 -----  
EPI\_ISL\_425548 -----  
EPI\_ISL\_425581 -----  
EPI\_ISL\_426881 -----  
EPI\_ISL\_426883 -----  
EPI\_ISL\_426888 -----  
EPI\_ISL\_426900 -----  
EPI\_ISL\_426901 -----  
EPI\_ISL\_426903 -----  
EPI\_ISL\_426904 -----  
EPI\_ISL\_426907 -----  
EPI\_ISL\_426910 -----  
ORF1ab 6301 KFTDGVCLFWNCNVDRYPANSIVCRFDTRVLSNLNLPGCDGGSLYVVKHAFHTPAFDKSA  
EPI\_ISL\_413575 -----  
EPI\_ISL\_413588 -----  
EPI\_ISL\_413589 -----  
EPI\_ISL\_424221 -----  
EPI\_ISL\_424233 -----  
EPI\_ISL\_424236 -----  
EPI\_ISL\_424238 -----  
EPI\_ISL\_424248 -----  
EPI\_ISL\_424254 -----  
EPI\_ISL\_425548 -----  
EPI\_ISL\_425581 -----  
EPI\_ISL\_426881 -----  
EPI\_ISL\_426883 -----  
EPI\_ISL\_426888 -----  
EPI\_ISL\_426900 -----  
EPI\_ISL\_426901 -----  
EPI\_ISL\_426903 -----  
EPI\_ISL\_426904 -----  
EPI\_ISL\_426907 -----  
EPI\_ISL\_426910 -----

```
ORF1ab          6361 FVNLKQLPFFYYSDSPCESHGKQVVSDDIDYVPLKSATCITRCNLGGAVCRHHANEYRLYL
EPI_ISL_413575 -----
EPI_ISL_413588 -----
EPI_ISL_413589 -----
EPI_ISL_424221 -----
EPI_ISL_424233 -----
EPI_ISL_424236 -----
EPI_ISL_424238 -----
EPI_ISL_424248 -----
EPI_ISL_424254 -----
EPI_ISL_425548 -----
EPI_ISL_425581 -----
EPI_ISL_426881 -----
EPI_ISL_426883 -----
EPI_ISL_426888 -----
EPI_ISL_426900 -----
EPI_ISL_426901 -----
EPI_ISL_426903 -----
EPI_ISL_426904 -----
EPI_ISL_426907 -----
EPI_ISL_426910 -----
ORF1ab          6361 FVNLKQLPFFYYSDSPCESHGKQVVSDDIDYVPLKSATCITRCNLGGAVCRHHANEYRLYL
EPI_ISL_413575 -----
EPI_ISL_413588 -----
EPI_ISL_413589 -----
EPI_ISL_424221 -----
EPI_ISL_424233 -----
EPI_ISL_424236 -----
EPI_ISL_424238 -----
EPI_ISL_424248 -----
EPI_ISL_424254 -----
EPI_ISL_425548 -----
EPI_ISL_425581 -----
EPI_ISL_426881 -----
EPI_ISL_426883 -----
EPI_ISL_426888 -----
EPI_ISL_426900 -----
EPI_ISL_426901 -----
EPI_ISL_426903 -----
EPI_ISL_426904 -----
EPI_ISL_426907 -----
EPI_ISL_426910 -----
```

ORF1ab 6421 DAYNMMISAGFSLWVYKQFDTYNLWNTFTRLQSLNVAFNVVNKGHFDGQQGEVPSIIN  
EPI\_ISL\_413575 -----  
EPI\_ISL\_413588 -----  
EPI\_ISL\_413589 -----  
EPI\_ISL\_424221 -----  
EPI\_ISL\_424233 -----  
EPI\_ISL\_424236 -----  
EPI\_ISL\_424238 -----  
EPI\_ISL\_424248 -----  
EPI\_ISL\_424254 -----  
EPI\_ISL\_425548 -----  
EPI\_ISL\_425581 -----  
EPI\_ISL\_426881 -----  
EPI\_ISL\_426883 -----  
EPI\_ISL\_426888 -----  
EPI\_ISL\_426900 -----  
EPI\_ISL\_426901 -----  
EPI\_ISL\_426903 -----  
EPI\_ISL\_426904 -----  
EPI\_ISL\_426907 -----  
EPI\_ISL\_426910 -----  
ORF1ab 6421 DAYNMMISAGFSLWVYKQFDTYNLWNTFTRLQSLNVAFNVVNKGHFDGQQGEVPSIIN  
EPI\_ISL\_413575 -----  
EPI\_ISL\_413588 -----  
EPI\_ISL\_413589 -----  
EPI\_ISL\_424221 -----  
EPI\_ISL\_424233 -----  
EPI\_ISL\_424236 -----  
EPI\_ISL\_424238 -----  
EPI\_ISL\_424248 -----  
EPI\_ISL\_424254 -----  
EPI\_ISL\_425548 -----  
EPI\_ISL\_425581 -----  
EPI\_ISL\_426881 -----  
EPI\_ISL\_426883 -----  
EPI\_ISL\_426888 -----  
EPI\_ISL\_426900 -----  
EPI\_ISL\_426901 -----  
EPI\_ISL\_426903 -----  
EPI\_ISL\_426904 -----  
EPI\_ISL\_426907 -----  
EPI\_ISL\_426910 -----

ORF1ab 6481 NTVYTKVDGVDVELFENKTTLPVNVAFELWAKRNIKPVPEVKILNNLGVDIAANTVIWDY  
EPI\_ISL\_413575 -----  
EPI\_ISL\_413588 -----  
EPI\_ISL\_413589 -----  
EPI\_ISL\_424221 -----  
EPI\_ISL\_424233 -----  
EPI\_ISL\_424236 -----  
EPI\_ISL\_424238 -----  
EPI\_ISL\_424248 -----  
EPI\_ISL\_424254 -----  
EPI\_ISL\_425548 -----  
EPI\_ISL\_425581 -----  
EPI\_ISL\_426881 -----  
EPI\_ISL\_426883 -----  
EPI\_ISL\_426888 -----  
EPI\_ISL\_426900 -----  
EPI\_ISL\_426901 -----  
EPI\_ISL\_426903 -----  
EPI\_ISL\_426904 -----  
EPI\_ISL\_426907 -----  
EPI\_ISL\_426910 -----  
ORF1ab 6481 NTVYTKVDGVDVELFENKTTLPVNVAFELWAKRNIKPVPEVKILNNLGVDIAANTVIWDY  
EPI\_ISL\_413575 -----  
EPI\_ISL\_413588 -----  
EPI\_ISL\_413589 -----  
EPI\_ISL\_424221 -----  
EPI\_ISL\_424233 -----  
EPI\_ISL\_424236 -----  
EPI\_ISL\_424238 -----  
EPI\_ISL\_424248 -----  
EPI\_ISL\_424254 -----  
EPI\_ISL\_425548 -----  
EPI\_ISL\_425581 -----  
EPI\_ISL\_426881 -----  
EPI\_ISL\_426883 -----  
EPI\_ISL\_426888 -----  
EPI\_ISL\_426900 -----  
EPI\_ISL\_426901 -----  
EPI\_ISL\_426903 -----  
EPI\_ISL\_426904 -----  
EPI\_ISL\_426907 -----  
EPI\_ISL\_426910 -----

```
ORF1ab          6541 KRDAHAHISTIGVCSMTDIAKKPTETICAPLTVFFDGRVDGQVDLFRNARNGVLIITEGSV
EPI_ISL_413575 -----
EPI_ISL_413588 -----
EPI_ISL_413589 -----
EPI_ISL_424221 -----
EPI_ISL_424233 -----
EPI_ISL_424236 -----
EPI_ISL_424238 -----
EPI_ISL_424248 -----
EPI_ISL_424254 -----
EPI_ISL_425548 -----
EPI_ISL_425581 -----
EPI_ISL_426881 -----
EPI_ISL_426883 -----
EPI_ISL_426888 -----
EPI_ISL_426900 -----
EPI_ISL_426901 -----
EPI_ISL_426903 -----
EPI_ISL_426904 -----
EPI_ISL_426907 -----
EPI_ISL_426910 -----
ORF1ab          6541 KRDAHAHISTIGVCSMTDIAKKPTETICAPLTVFFDGRVDGQVDLFRNARNGVLIITEGSV
EPI_ISL_413575 -----
EPI_ISL_413588 -----
EPI_ISL_413589 -----
EPI_ISL_424221 -----
EPI_ISL_424233 -----
EPI_ISL_424236 -----
EPI_ISL_424238 -----
EPI_ISL_424248 -----
EPI_ISL_424254 -----
EPI_ISL_425548 -----
EPI_ISL_425581 -----
EPI_ISL_426881 -----
EPI_ISL_426883 -----
EPI_ISL_426888 -----
EPI_ISL_426900 -----
EPI_ISL_426901 -----
EPI_ISL_426903 -----
EPI_ISL_426904 -----
EPI_ISL_426907 -----
EPI_ISL_426910 -----
```

ORF1ab 6601 KGLQPSVGPKQASLNGVTLIGEAVKTQFNYYKKVDGTVVQQLPETYFTQSRNLQEFKPRSQ  
EPI\_ISL\_413575 -----  
EPI\_ISL\_413588 -----  
EPI\_ISL\_413589 -----  
EPI\_ISL\_424221 -----  
EPI\_ISL\_424233 -----  
EPI\_ISL\_424236 -----  
EPI\_ISL\_424238 -----  
EPI\_ISL\_424248 -----  
EPI\_ISL\_424254 -----  
EPI\_ISL\_425548 -----  
EPI\_ISL\_425581 -----  
EPI\_ISL\_426881 -----  
EPI\_ISL\_426883 -----  
EPI\_ISL\_426888 -----  
EPI\_ISL\_426900 -----  
EPI\_ISL\_426901 -----  
EPI\_ISL\_426903 -----  
EPI\_ISL\_426904 -----  
EPI\_ISL\_426907 -----  
EPI\_ISL\_426910 -----  
ORF1ab 6601 KGLQPSVGPKQASLNGVTLIGEAVKTQFNYYKKVDGTVVQQLPETYFTQSRNLQEFKPRSQ  
EPI\_ISL\_413575 -----  
EPI\_ISL\_413588 -----  
EPI\_ISL\_413589 -----  
EPI\_ISL\_424221 -----  
EPI\_ISL\_424233 -----  
EPI\_ISL\_424236 -----  
EPI\_ISL\_424238 -----  
EPI\_ISL\_424248 -----  
EPI\_ISL\_424254 -----  
EPI\_ISL\_425548 -----  
EPI\_ISL\_425581 -----  
EPI\_ISL\_426881 -----  
EPI\_ISL\_426883 -----  
EPI\_ISL\_426888 -----  
EPI\_ISL\_426900 -----  
EPI\_ISL\_426901 -----  
EPI\_ISL\_426903 -----  
EPI\_ISL\_426904 -----  
EPI\_ISL\_426907 -----  
EPI\_ISL\_426910 -----

ORF1ab 6661 MEIDFLELAMDEFIERYKLEGYAFEHIVYGDFSHSQLGGLHLLIGLAKRFKESPFLEDF  
EPI\_ISL\_413575 -----  
EPI\_ISL\_413588 -----  
EPI\_ISL\_413589 -----  
EPI\_ISL\_424221 -----  
EPI\_ISL\_424233 -----  
EPI\_ISL\_424236 -----  
EPI\_ISL\_424238 -----  
EPI\_ISL\_424248 -----  
EPI\_ISL\_424254 -----  
EPI\_ISL\_425548 -----  
EPI\_ISL\_425581 -----  
EPI\_ISL\_426881 -----  
EPI\_ISL\_426883 -----  
EPI\_ISL\_426888 -----  
EPI\_ISL\_426900 -----  
EPI\_ISL\_426901 -----  
EPI\_ISL\_426903 -----  
EPI\_ISL\_426904 -----  
EPI\_ISL\_426907 -----  
EPI\_ISL\_426910 -----  
ORF1ab 6661 MEIDFLELAMDEFIERYKLEGYAFEHIVYGDFSHSQLGGLHLLIGLAKRFKESPFLEDF  
EPI\_ISL\_413575 -----  
EPI\_ISL\_413588 -----  
EPI\_ISL\_413589 -----  
EPI\_ISL\_424221 -----  
EPI\_ISL\_424233 -----  
EPI\_ISL\_424236 -----  
EPI\_ISL\_424238 -----  
EPI\_ISL\_424248 -----  
EPI\_ISL\_424254 -----  
EPI\_ISL\_425548 -----  
EPI\_ISL\_425581 -----  
EPI\_ISL\_426881 -----  
EPI\_ISL\_426883 -----  
EPI\_ISL\_426888 -----  
EPI\_ISL\_426900 -----  
EPI\_ISL\_426901 -----  
EPI\_ISL\_426903 -----  
EPI\_ISL\_426904 -----  
EPI\_ISL\_426907 -----  
EPI\_ISL\_426910 -----



ORF1ab 6721 IPMDSTVKNYFITDAQTGSSKCVCSVIDLLLLDDFVEI IKSQDLSVVSQVVKVTIDYTEIS  
EPI\_ISL\_413575 -----  
EPI\_ISL\_413588 -----  
EPI\_ISL\_413589 -----  
EPI\_ISL\_424221 -----  
EPI\_ISL\_424233 -----  
EPI\_ISL\_424236 -----  
EPI\_ISL\_424238 -----  
EPI\_ISL\_424248 -----  
EPI\_ISL\_424254 -----  
EPI\_ISL\_425548 -----  
EPI\_ISL\_425581 -----  
EPI\_ISL\_426881 -----  
EPI\_ISL\_426883 -----  
EPI\_ISL\_426888 -----  
EPI\_ISL\_426900 -----  
EPI\_ISL\_426901 -----  
EPI\_ISL\_426903 -----  
EPI\_ISL\_426904 -----  
EPI\_ISL\_426907 -----  
EPI\_ISL\_426910 -----  
ORF1ab 6721 IPMDSTVKNYFITDAQTGSSKCVCSVIDLLLLDDFVEI IKSQDLSVVSQVVKVTIDYTEIS  
EPI\_ISL\_413575 -----  
EPI\_ISL\_413588 -----  
EPI\_ISL\_413589 -----  
EPI\_ISL\_424221 -----  
EPI\_ISL\_424233 -----  
EPI\_ISL\_424236 -----  
EPI\_ISL\_424238 -----  
EPI\_ISL\_424248 -----  
EPI\_ISL\_424254 -----  
EPI\_ISL\_425548 -----  
EPI\_ISL\_425581 -----  
EPI\_ISL\_426881 -----  
EPI\_ISL\_426883 -----  
EPI\_ISL\_426888 -----  
EPI\_ISL\_426900 -----  
EPI\_ISL\_426901 -----  
EPI\_ISL\_426903 -----  
EPI\_ISL\_426904 -----  
EPI\_ISL\_426907 -----  
EPI\_ISL\_426910 -----

ORF1ab 6781 FMLWCKDGHVETFYPKLQSSQAWQPGVAMPNLYKMQRMLLEKCDLQNYGDSATLPKGIMM  
EPI\_ISL\_413575 -----  
EPI\_ISL\_413588 -----  
EPI\_ISL\_413589 -----  
EPI\_ISL\_424221 -----  
EPI\_ISL\_424233 -----  
EPI\_ISL\_424236 -----  
EPI\_ISL\_424238 -----  
EPI\_ISL\_424248 -----  
EPI\_ISL\_424254 -----  
EPI\_ISL\_425548 -----  
EPI\_ISL\_425581 -----  
EPI\_ISL\_426881 -----  
EPI\_ISL\_426883 -----  
EPI\_ISL\_426888 -----  
EPI\_ISL\_426900 -----  
EPI\_ISL\_426901 -----  
EPI\_ISL\_426903 -----  
EPI\_ISL\_426904 -----  
EPI\_ISL\_426907 -----  
EPI\_ISL\_426910 -----  
ORF1ab 6781 FMLWCKDGHVETFYPKLQSSQAWQPGVAMPNLYKMQRMLLEKCDLQNYGDSATLPKGIMM  
EPI\_ISL\_413575 -----  
EPI\_ISL\_413588 -----  
EPI\_ISL\_413589 -----  
EPI\_ISL\_424221 -----  
EPI\_ISL\_424233 -----  
EPI\_ISL\_424236 -----  
EPI\_ISL\_424238 -----  
EPI\_ISL\_424248 -----  
EPI\_ISL\_424254 -----  
EPI\_ISL\_425548 -----  
EPI\_ISL\_425581 -----  
EPI\_ISL\_426881 -----  
EPI\_ISL\_426883 -----  
EPI\_ISL\_426888 -----  
EPI\_ISL\_426900 -----  
EPI\_ISL\_426901 -----  
EPI\_ISL\_426903 -----  
EPI\_ISL\_426904 -----  
EPI\_ISL\_426907 -----  
EPI\_ISL\_426910 -----

ORF1ab 6841 NVAKYTQLCQYLNTLTLAVPYNMRVIHFGAGSDKGVAPGTAVLRQWLPTGTLVDSDLND  
EPI\_ISL\_413575 -----  
EPI\_ISL\_413588 -----  
EPI\_ISL\_413589 -----  
EPI\_ISL\_424221 -----  
EPI\_ISL\_424233 -----  
EPI\_ISL\_424236 -----  
EPI\_ISL\_424238 -----  
EPI\_ISL\_424248 -----  
EPI\_ISL\_424254 -----  
EPI\_ISL\_425548 -----  
EPI\_ISL\_425581 -----  
EPI\_ISL\_426881 -----  
EPI\_ISL\_426883 -----  
EPI\_ISL\_426888 -----  
EPI\_ISL\_426900 -----  
EPI\_ISL\_426901 -----  
EPI\_ISL\_426903 -----  
EPI\_ISL\_426904 -----  
EPI\_ISL\_426907 -----  
EPI\_ISL\_426910 -----  
ORF1ab 6841 NVAKYTQLCQYLNTLTLAVPYNMRVIHFGAGSDKGVAPGTAVLRQWLPTGTLVDSDLND  
EPI\_ISL\_413575 -----  
EPI\_ISL\_413588 -----  
EPI\_ISL\_413589 -----  
EPI\_ISL\_424221 -----  
EPI\_ISL\_424233 -----  
EPI\_ISL\_424236 -----  
EPI\_ISL\_424238 -----  
EPI\_ISL\_424248 -----  
EPI\_ISL\_424254 -----  
EPI\_ISL\_425548 -----  
EPI\_ISL\_425581 -----  
EPI\_ISL\_426881 -----  
EPI\_ISL\_426883 -----  
EPI\_ISL\_426888 -----  
EPI\_ISL\_426900 -----  
EPI\_ISL\_426901 -----  
EPI\_ISL\_426903 -----  
EPI\_ISL\_426904 -----  
EPI\_ISL\_426907 -----  
EPI\_ISL\_426910 -----

ORF1ab 6901 FVSDADSTLIGDCATVHTANKWDLIISDMYDPKTKNVTKENDSKEGFFTYICGFIQQKLA  
EPI\_ISL\_413575 -----  
EPI\_ISL\_413588 -----  
EPI\_ISL\_413589 -----  
EPI\_ISL\_424221 -----  
EPI\_ISL\_424233 -----  
EPI\_ISL\_424236 -----  
EPI\_ISL\_424238 -----  
EPI\_ISL\_424248 -----  
EPI\_ISL\_424254 -----  
EPI\_ISL\_425548 -----  
EPI\_ISL\_425581 -----  
EPI\_ISL\_426881 -----  
EPI\_ISL\_426883 -----  
EPI\_ISL\_426888 -----  
EPI\_ISL\_426900 -----  
EPI\_ISL\_426901 -----  
EPI\_ISL\_426903 -----  
EPI\_ISL\_426904 -----  
EPI\_ISL\_426907 -----  
EPI\_ISL\_426910 -----  
ORF1ab 6901 FVSDADSTLIGDCATVHTANKWDLIISDMYDPKTKNVTKENDSKEGFFTYICGFIQQKLA  
EPI\_ISL\_413575 -----  
EPI\_ISL\_413588 -----  
EPI\_ISL\_413589 -----  
EPI\_ISL\_424221 -----  
EPI\_ISL\_424233 -----  
EPI\_ISL\_424236 -----  
EPI\_ISL\_424238 -----  
EPI\_ISL\_424248 -----  
EPI\_ISL\_424254 -----  
EPI\_ISL\_425548 -----  
EPI\_ISL\_425581 -----  
EPI\_ISL\_426881 -----  
EPI\_ISL\_426883 -----  
EPI\_ISL\_426888 -----  
EPI\_ISL\_426900 -----  
EPI\_ISL\_426901 -----  
EPI\_ISL\_426903 -----  
EPI\_ISL\_426904 -----  
EPI\_ISL\_426907 -----  
EPI\_ISL\_426910 -----

ORF1ab 6961 LGGSSVAIKITEHSWNADLYKLMGHFAWWTAFVTNVNASSSEAFLLIGCNLYLGKPREQIDGY  
EPI\_ISL\_413575 -----  
EPI\_ISL\_413588 -----  
EPI\_ISL\_413589 -----  
EPI\_ISL\_424221 -----  
EPI\_ISL\_424233 -----  
EPI\_ISL\_424236 -----  
EPI\_ISL\_424238 -----  
EPI\_ISL\_424248 -----  
EPI\_ISL\_424254 -----  
EPI\_ISL\_425548 -----  
EPI\_ISL\_425581 -----  
EPI\_ISL\_426881 -----  
EPI\_ISL\_426883 -----  
EPI\_ISL\_426888 -----  
EPI\_ISL\_426900 -----  
EPI\_ISL\_426901 -----  
EPI\_ISL\_426903 -----  
EPI\_ISL\_426904 -----  
EPI\_ISL\_426907 -----  
EPI\_ISL\_426910 -----  
ORF1ab 6961 LGGSSVAIKITEHSWNADLYKLMGHFAWWTAFVTNVNASSSEAFLLIGCNLYLGKPREQIDGY  
EPI\_ISL\_413575 -----  
EPI\_ISL\_413588 -----  
EPI\_ISL\_413589 -----  
EPI\_ISL\_424221 -----  
EPI\_ISL\_424233 -----  
EPI\_ISL\_424236 -----  
EPI\_ISL\_424238 -----  
EPI\_ISL\_424248 -----  
EPI\_ISL\_424254 -----  
EPI\_ISL\_425548 -----  
EPI\_ISL\_425581 -----  
EPI\_ISL\_426881 -----  
EPI\_ISL\_426883 -----  
EPI\_ISL\_426888 -----  
EPI\_ISL\_426900 -----  
EPI\_ISL\_426901 -----  
EPI\_ISL\_426903 -----  
EPI\_ISL\_426904 -----  
EPI\_ISL\_426907 -----  
EPI\_ISL\_426910 -----

```
ORF1ab          7021 VMHANYIFWRNTNPIQLSSYSLFDMSEKFLKLRGTAVMSLKEGQINDMILSLLSKGRLII
EPI_ISL_413575 -----
EPI_ISL_413588 -----
EPI_ISL_413589 -----
EPI_ISL_424221 -----
EPI_ISL_424233 -----
EPI_ISL_424236 -----
EPI_ISL_424238 -----
EPI_ISL_424248 -----
EPI_ISL_424254 -----
EPI_ISL_425548 -----
EPI_ISL_425581 -----
EPI_ISL_426881 -----
EPI_ISL_426883 -----
EPI_ISL_426888 -----
EPI_ISL_426900 -----
EPI_ISL_426901 -----
EPI_ISL_426903 -----
EPI_ISL_426904 -----
EPI_ISL_426907 -----
EPI_ISL_426910 -----
ORF1ab          7021 VMHANYIFWRNTNPIQLSSYSLFDMSEKFLKLRGTAVMSLKEGQINDMILSLLSKGRLII
EPI_ISL_413575 -----
EPI_ISL_413588 -----
EPI_ISL_413589 -----
EPI_ISL_424221 -----
EPI_ISL_424233 -----
EPI_ISL_424236 -----
EPI_ISL_424238 -----
EPI_ISL_424248 -----
EPI_ISL_424254 -----
EPI_ISL_425548 -----
EPI_ISL_425581 -----
EPI_ISL_426881 -----
EPI_ISL_426883 -----
EPI_ISL_426888 -----
EPI_ISL_426900 -----
EPI_ISL_426901 -----
EPI_ISL_426903 -----
EPI_ISL_426904 -----
EPI_ISL_426907 -----
EPI_ISL_426910 -----
```

|                |      |                  |
|----------------|------|------------------|
| ORFlab         | 7081 | RENNRVVISSDVLVNN |
| EPI_ISL_413575 |      | -----            |
| EPI_ISL_413588 |      | -----            |
| EPI_ISL_413589 |      | -----            |
| EPI_ISL_424221 |      | -----            |
| EPI_ISL_424233 |      | -----            |
| EPI_ISL_424236 |      | -----            |
| EPI_ISL_424238 |      | -----            |
| EPI_ISL_424248 |      | -----            |
| EPI_ISL_424254 |      | -----            |
| EPI_ISL_425548 |      | -----            |
| EPI_ISL_425581 |      | -----            |
| EPI_ISL_426881 |      | -----            |
| EPI_ISL_426883 |      | -----            |
| EPI_ISL_426888 |      | -----            |
| EPI_ISL_426900 |      | -----            |
| EPI_ISL_426901 |      | -----            |
| EPI_ISL_426903 |      | -----            |
| EPI_ISL_426904 |      | -----            |
| EPI_ISL_426907 |      | -----            |
| EPI_ISL_426910 |      | -----            |
| ORFlab         | 7081 | RENNRVVISSDVLVNN |
| EPI_ISL_413575 |      | -----            |
| EPI_ISL_413588 |      | -----            |
| EPI_ISL_413589 |      | -----            |
| EPI_ISL_424221 |      | -----            |
| EPI_ISL_424233 |      | -----            |
| EPI_ISL_424236 |      | -----            |
| EPI_ISL_424238 |      | -----            |
| EPI_ISL_424248 |      | -----            |
| EPI_ISL_424254 |      | -----            |
| EPI_ISL_425548 |      | -----            |
| EPI_ISL_425581 |      | -----            |
| EPI_ISL_426881 |      | -----            |
| EPI_ISL_426883 |      | -----            |
| EPI_ISL_426888 |      | -----            |
| EPI_ISL_426900 |      | -----            |
| EPI_ISL_426901 |      | -----            |
| EPI_ISL_426903 |      | -----            |
| EPI_ISL_426904 |      | -----            |
| EPI_ISL_426907 |      | -----            |
| EPI_ISL_426910 |      | -----            |





# Clade GR

ORF1ab 1 MESLVPGFNEKTHVQLSLPVLQVRDVLVRGFGDSVEEVLSERQHLKDGTCGLVEVEKGV  
EPI\_ISL\_413571 1 -----  
EPI\_ISL\_413574 1 -----  
EPI\_ISL\_413579 1 -----  
EPI\_ISL\_413584 1 -----  
EPI\_ISL\_413587 1 -----  
EPI\_ISL\_424257 1 -----  
EPI\_ISL\_425565 1 -----  
EPI\_ISL\_425575 1 -----  
EPI\_ISL\_426822 1 -----  
EPI\_ISL\_426833 1 -----  
EPI\_ISL\_426885 1 -----  
EPI\_ISL\_426886 1 -----  
EPI\_ISL\_426889 1 -----  
EPI\_ISL\_426891 1 -----  
EPI\_ISL\_426892 1 -----  
EPI\_ISL\_426894 1 -----  
EPI\_ISL\_426896 1 -----  
EPI\_ISL\_426897 1 -----  
EPI\_ISL\_426899 1 -----  
EPI\_ISL\_426906 1 -----

ORF1ab 61 LPQLEQPYVFIKRSDARTAPHGHVMVELVAELEGIQYGRSGETLGVLPVHVGEIPVAYRK  
EPI\_ISL\_413571 1 -----  
EPI\_ISL\_413574 1 -----  
EPI\_ISL\_413579 1 -----  
EPI\_ISL\_413584 1 -----  
EPI\_ISL\_413587 1 -----  
EPI\_ISL\_424257 1 -----  
EPI\_ISL\_425565 1 -----  
EPI\_ISL\_425575 1 -----  
EPI\_ISL\_426822 1 -----  
EPI\_ISL\_426833 1 -----  
EPI\_ISL\_426885 1 -----  
EPI\_ISL\_426886 1 -----  
EPI\_ISL\_426889 1 -----  
EPI\_ISL\_426891 1 -----  
EPI\_ISL\_426892 1 -----  
EPI\_ISL\_426894 1 -----  
EPI\_ISL\_426896 1 -----  
EPI\_ISL\_426897 1 -----  
EPI\_ISL\_426899 1 -----  
EPI\_ISL\_426906 1 -----

ORF1ab 121 VLLRKNGNKGAGGHSYGADLKSFDLGDDELGTDPYEDFQENWNTKHSSGVTRELMRELNGG  
EPI\_ISL\_413571 1 -----  
EPI\_ISL\_413574 1 -----  
EPI\_ISL\_413579 1 -----  
EPI\_ISL\_413584 1 -----  
EPI\_ISL\_413587 1 -----  
EPI\_ISL\_424257 1 -----  
EPI\_ISL\_425565 1 -----  
EPI\_ISL\_425575 1 -----  
EPI\_ISL\_426822 1 -----  
EPI\_ISL\_426833 1 -----  
EPI\_ISL\_426885 1 -----  
EPI\_ISL\_426886 1 -----  
EPI\_ISL\_426889 1 -----  
EPI\_ISL\_426891 1 -----  
EPI\_ISL\_426892 1 -----

|                |   |       |
|----------------|---|-------|
| EPI_ISL_426894 | 1 | ----- |
| EPI_ISL_426896 | 1 | ----- |
| EPI_ISL_426897 | 1 | ----- |
| EPI_ISL_426899 | 1 | ----- |
| EPI_ISL_426906 | 1 | ----- |

ORF1ab 181 AYTRYVDNNFCGPDGYPLECIKDLLARAGKASCTLSEQLDFIDTKRGVYCCREHEHEIAW  
EPI\_ISL\_413571 1 -----  
EPI\_ISL\_413574 1 -----  
EPI\_ISL\_413579 1 -----  
EPI\_ISL\_413584 1 -----  
EPI\_ISL\_413587 1 -----  
EPI\_ISL\_424257 1 -----  
EPI\_ISL\_425565 1 -----  
EPI\_ISL\_425575 1 -----  
EPI\_ISL\_426822 1 -----  
EPI\_ISL\_426833 1 -----  
EPI\_ISL\_426885 1 -----  
EPI\_ISL\_426886 1 -----  
EPI\_ISL\_426889 1 -----  
EPI\_ISL\_426891 1 -----  
EPI\_ISL\_426892 1 -----  
EPI\_ISL\_426894 1 -----  
EPI\_ISL\_426896 1 -----  
EPI\_ISL\_426897 1 -----  
EPI\_ISL\_426899 1 -----  
EPI\_ISL\_426906 1 -----

ORF1ab 241 YTERSEKSYELQTPFEIKLAKKFDTFNGECPNFVFPPLNSIIKTIQPRVEKKKLDGFMGRI  
EPI\_ISL\_413571 1 -----  
EPI\_ISL\_413574 1 -----  
EPI\_ISL\_413579 1 -----  
EPI\_ISL\_413584 1 -----  
EPI\_ISL\_413587 1 -----  
EPI\_ISL\_424257 1 -----  
EPI\_ISL\_425565 1 -----  
EPI\_ISL\_425575 1 -----  
EPI\_ISL\_426822 1 -----  
EPI\_ISL\_426833 1 -----  
EPI\_ISL\_426885 1 -----  
EPI\_ISL\_426886 1 -----  
EPI\_ISL\_426889 1 -----  
EPI\_ISL\_426891 1 -----  
EPI\_ISL\_426892 1 -----  
EPI\_ISL\_426894 1 -----  
EPI\_ISL\_426896 1 -----  
EPI\_ISL\_426897 1 -----  
EPI\_ISL\_426899 1 -----  
EPI\_ISL\_426906 1 -----

ORF1ab 301 RSVYPVASPNECNQMCLSTLMKCDHCGETSWQTGDFVKATCEFCGTENLTKEGATTCGYL  
EPI\_ISL\_413571 1 -----  
EPI\_ISL\_413574 1 -----  
EPI\_ISL\_413579 1 -----  
EPI\_ISL\_413584 1 -----  
EPI\_ISL\_413587 1 -----  
EPI\_ISL\_424257 1 -----  
EPI\_ISL\_425565 1 -----  
EPI\_ISL\_425575 1 -----  
EPI\_ISL\_426822 1 -----  
EPI\_ISL\_426833 1 -----  
EPI\_ISL\_426885 1 -----  
EPI\_ISL\_426886 1 -----  
EPI\_ISL\_426889 1 -----  
EPI\_ISL\_426891 1 -----  
EPI\_ISL\_426892 1 -----  
EPI\_ISL\_426894 1 -----  
EPI\_ISL\_426896 1 -----  
EPI\_ISL\_426897 1 -----  
EPI\_ISL\_426899 1 -----



ORF1ab 361 PQNAVVKIYCPACHNSEVGPESHSLAEYHNESGLKTIILRKGGRRTIAFGGCVFSYVGCHNKC  
EPI\_ISL\_413571 1 -----  
EPI\_ISL\_413574 1 -----  
EPI\_ISL\_413579 1 -----  
EPI\_ISL\_413584 1 -----  
EPI\_ISL\_413587 1 -----  
EPI\_ISL\_424257 1 -----  
EPI\_ISL\_425565 1 -----  
EPI\_ISL\_425575 1 -----  
EPI\_ISL\_426822 1 -----  
EPI\_ISL\_426833 1 -----  
EPI\_ISL\_426885 1 -----  
EPI\_ISL\_426886 1 -----  
EPI\_ISL\_426889 1 -----  
EPI\_ISL\_426891 1 -----  
EPI\_ISL\_426892 1 -----  
EPI\_ISL\_426894 1 -----  
EPI\_ISL\_426896 1 -----  
EPI\_ISL\_426897 1 -----  
EPI\_ISL\_426899 1 -----  
EPI\_ISL\_426906 1 -----

ORF1ab 421 AYWVPRASANIGCNHTGVVGESEGLNDNLLEILQKEKVNINIVGDFKLNEEIAIILASF  
EPI\_ISL\_413571 1 -----  
EPI\_ISL\_413574 1 -----  
EPI\_ISL\_413579 1 -----  
EPI\_ISL\_413584 1 -----  
EPI\_ISL\_413587 1 -----  
EPI\_ISL\_424257 1 -----  
EPI\_ISL\_425565 1 -----  
EPI\_ISL\_425575 1 -----  
EPI\_ISL\_426822 1 -----  
EPI\_ISL\_426833 1 -----  
EPI\_ISL\_426885 1 -----  
EPI\_ISL\_426886 1 -----  
EPI\_ISL\_426889 1 -----  
EPI\_ISL\_426891 1 -----  
EPI\_ISL\_426892 1 -----  
EPI\_ISL\_426894 1 -----  
EPI\_ISL\_426896 1 -----  
EPI\_ISL\_426897 1 -----  
EPI\_ISL\_426899 1 -----  
EPI\_ISL\_426906 1 -----

ORF1ab 481 SASTSAFVETVKGLDYKAFKQIVESCGNFKVTKGKAKKGAWNIGEQKSILSPLYAFASEA  
EPI\_ISL\_413571 1 -----  
EPI\_ISL\_413574 1 -----  
EPI\_ISL\_413579 1 -----  
EPI\_ISL\_413584 1 -----  
EPI\_ISL\_413587 1 -----  
EPI\_ISL\_424257 1 -----  
EPI\_ISL\_425565 1 -----  
EPI\_ISL\_425575 1 -----  
EPI\_ISL\_426822 1 -----  
EPI\_ISL\_426833 1 -----  
EPI\_ISL\_426885 1 -----  
EPI\_ISL\_426886 1 -----  
EPI\_ISL\_426889 1 -----  
EPI\_ISL\_426891 1 -----  
EPI\_ISL\_426892 1 -----  
EPI\_ISL\_426894 1 -----  
EPI\_ISL\_426896 1 -----  
EPI\_ISL\_426897 1 -----  
EPI\_ISL\_426899 1 -----



ORF1ab 541 ARVVRSIFSRTLETAQNSVRVLQKAAITILDGISQYSLRLIDAMMFTSDLATNNLVVMAY  
EPI\_ISL\_413571 1 -----  
EPI\_ISL\_413574 1 -----  
EPI\_ISL\_413579 1 -----  
EPI\_ISL\_413584 1 -----  
EPI\_ISL\_413587 1 -----  
EPI\_ISL\_424257 1 -----  
EPI\_ISL\_425565 1 -----  
EPI\_ISL\_425575 1 -----  
EPI\_ISL\_426822 1 -----  
EPI\_ISL\_426833 1 -----  
EPI\_ISL\_426885 1 -----  
EPI\_ISL\_426886 1 -----  
EPI\_ISL\_426889 1 -----  
EPI\_ISL\_426891 1 -----  
EPI\_ISL\_426892 1 -----  
EPI\_ISL\_426894 1 -----  
EPI\_ISL\_426896 1 -----  
EPI\_ISL\_426897 1 -----  
EPI\_ISL\_426899 1 -----  
EPI\_ISL\_426906 1 -----

ORF1ab 601 ITGGVVQLTSQWLTNIFGTVYEKLPVLDWLEEKFKEGVEFLRDGWEIVKFI STCACEIV  
EPI\_ISL\_413571 1 -----  
EPI\_ISL\_413574 1 -----  
EPI\_ISL\_413579 1 -----  
EPI\_ISL\_413584 1 -----  
EPI\_ISL\_413587 1 -----  
EPI\_ISL\_424257 1 -----  
EPI\_ISL\_425565 1 -----  
EPI\_ISL\_425575 1 -----  
EPI\_ISL\_426822 1 -----  
EPI\_ISL\_426833 1 -----  
EPI\_ISL\_426885 1 -----  
EPI\_ISL\_426886 1 -----  
EPI\_ISL\_426889 1 -----  
EPI\_ISL\_426891 1 -----  
EPI\_ISL\_426892 1 -----  
EPI\_ISL\_426894 1 -----  
EPI\_ISL\_426896 1 -----  
EPI\_ISL\_426897 1 -----  
EPI\_ISL\_426899 1 -----  
EPI\_ISL\_426906 1 -----

ORF1ab 661 GGQIVTCAKEIKESVQTFKLVNKFALCADSIIIGGAKLKALNLGETFVTHSKGLYRKC  
EPI\_ISL\_413571 1 -----  
EPI\_ISL\_413574 1 -----  
EPI\_ISL\_413579 1 -----  
EPI\_ISL\_413584 1 -----  
EPI\_ISL\_413587 1 -----  
EPI\_ISL\_424257 1 -----  
EPI\_ISL\_425565 1 -----  
EPI\_ISL\_425575 1 -----  
EPI\_ISL\_426822 1 -----  
EPI\_ISL\_426833 1 -----  
EPI\_ISL\_426885 1 -----  
EPI\_ISL\_426886 1 -----  
EPI\_ISL\_426889 1 -----  
EPI\_ISL\_426891 1 -----  
EPI\_ISL\_426892 1 -----  
EPI\_ISL\_426894 1 -----  
EPI\_ISL\_426896 1 -----  
EPI\_ISL\_426897 1 -----  
EPI\_ISL\_426899 1 -----





ORF1ab 721 VKSREETGLMLPLKAPKEIIFLEGETLPTEVLTEEVVLKTGDLQPLEQPTSEAVEAPLVG  
EPI\_ISL\_413571 1 -----  
EPI\_ISL\_413574 1 -----  
EPI\_ISL\_413579 1 -----  
EPI\_ISL\_413584 1 -----  
EPI\_ISL\_413587 1 -----  
EPI\_ISL\_424257 1 -----  
EPI\_ISL\_425565 1 -----  
EPI\_ISL\_425575 1 -----  
EPI\_ISL\_426822 1 -----  
EPI\_ISL\_426833 1 -----  
EPI\_ISL\_426885 1 -----  
EPI\_ISL\_426886 1 -----  
EPI\_ISL\_426889 1 -----  
EPI\_ISL\_426891 1 -----  
EPI\_ISL\_426892 1 -----  
EPI\_ISL\_426894 1 -----  
EPI\_ISL\_426896 1 -----  
EPI\_ISL\_426897 1 -----  
EPI\_ISL\_426899 1 -----  
EPI\_ISL\_426906 1 -----

ORF1ab 781 TPVCINGLMLLEIKDTEKYCALAPNMMVTNNTFTLKGGAPTKVTFGDDTVIEVQGYKSVN  
EPI\_ISL\_413571 1 -----APTKVTFGDDTVIEVQGYKSVN  
EPI\_ISL\_413574 1 -----APTKVTFGDDTVIEVQGYKSVN  
EPI\_ISL\_413579 1 -----APTKVTFGDDTVIEVQGYKSVN  
EPI\_ISL\_413584 1 -----APTKVTFGDDTVIEVQGYKSVN  
EPI\_ISL\_413587 1 -----APTKVTFGDDTVIEVQGYKSVN  
EPI\_ISL\_424257 1 -----APTKVTFGDDTVIEVQGYKSVN  
EPI\_ISL\_425565 1 -----APTKVTFGDDTVIEVQGYKSVN  
EPI\_ISL\_425575 1 -----APTKVTFGDDTVIEVQGYKSVN  
EPI\_ISL\_426822 1 -----APTKVTFGDDTVIEVQGYKSVN  
EPI\_ISL\_426833 1 -----APTKVTFGDDTVIEVQGYKSVN  
EPI\_ISL\_426885 1 -----APTKVTFGDDTVIEVQGYKSVN  
EPI\_ISL\_426886 1 -----APTKVTFGDDTVIEVQGYKSVN  
EPI\_ISL\_426889 1 -----APTKVTFGDDTVIEVQGYKSVN  
EPI\_ISL\_426891 1 -----APTKVTFGDDTVIEVQGYKSVN  
EPI\_ISL\_426892 1 -----APTKVTFGDDTVIEVQGYKSVN  
EPI\_ISL\_426894 1 -----APTKVTFGDDTVIEVQGYKSVN  
EPI\_ISL\_426896 1 -----APTKVTFGDDTVIEVQGYKSVN  
EPI\_ISL\_426897 1 -----APTKVTFGDDTVIEVQGYKSVN  
EPI\_ISL\_426899 1 -----APTKVTFGDDTVIEVQGYKSVN  
EPI\_ISL\_426906 1 -----APTKVTFGDDTVIEVQGYKSVN

ORF1ab 841 ITFELDERIDKVLNEKCSAYTVELGTEVNEFACVVADAVIKTLQPVSELLTPLGIDLDEW  
EPI\_ISL\_413571 23 ITFELDERIDKVLNEKCSAYTVELGTEVNEFACVVADAVIKTLQPVSELLTPLGIDLDEW  
EPI\_ISL\_413574 23 ITFELDERIDKVLNEKCSAYTVELGTEVNEFACVVADAVIKTLQPVSELLTPLGIDLDEW  
EPI\_ISL\_413579 23 ITFELDERIDKVLNEKCSAYTVELGTEVNEFACVVADAVIKTLQPVSELLTPLGIDLDEW  
EPI\_ISL\_413584 23 ITFELDERIDKVLNEKCSAYTVELGTEVNEFACVVADAVIKTLQPVSELLTPLGIDLDEW  
EPI\_ISL\_413587 23 ITFELDERIDKVLNEKCSAYTVELGTEVNEFACVVADAVIKTLQPVSELLTPLGIDLDEW  
EPI\_ISL\_424257 23 ITFELDERIDKVLNEKCSAYTVELGTEVNEFACVVADAVIKTLQPVSELLTPLGIDLDEW  
EPI\_ISL\_425565 23 ITFELDERIDKVLNEKCSAYTVELGTEVNEFACVVADAVIKTLQPVSELLTPLGIDLDEW  
EPI\_ISL\_425575 23 ITFELDERIDKVLNEKCSAYTVELGTEVNEFACVVADAVIKTLQPVSELLTPLGIDLDEW  
EPI\_ISL\_426822 23 ITFELDERIDKVLNEKCSAYTVELGTEVNEFACVVADAVIKTLQPVSELLTPLGIDLDEW  
EPI\_ISL\_426833 23 ITFELDERIDKVLNEKCSAYTVELGTEVNEFACVVADAVIKTLQPVSELLTPLGIDLDEW  
EPI\_ISL\_426885 23 ITFELDERIDKVLNEKCSAYTVELGTEVNEFACVVADAVIKTLQPVSELLTPLGIDLDEW  
EPI\_ISL\_426886 23 ITFELDERIDKVLNEKCSAYTVELGTEVNEFACVVADAVIKTLQPVSELLTPLGIDLDEW  
EPI\_ISL\_426889 23 ITFELDERIDKVLNEKCSAYTVELGTEVNEFACVVADAVIKTLQPVSELLTPLGIDLDEW  
EPI\_ISL\_426891 23 ITFELDERIDKVLNEKCSAYTVELGTEVNEFACVVADAVIKTLQPVSELLTPLGIDLDEW  
EPI\_ISL\_426892 23 ITFELDERIDKVLNEKCSAYTVELGTEVNEFACVVADAVIKTLQPVSELLTPLGIDLDEW  
EPI\_ISL\_426894 23 ITFELDERIDKVLNEKCSAYTVELGTEVNEFACVVADAVIKTLQPVSELLTPLGIDLDEW  
EPI\_ISL\_426896 23 ITFELDERIDKVLNEKCSAYTVELGTEVNEFACVVADAVIKTLQPVSELLTPLGIDLDEW  
EPI\_ISL\_426897 23 ITFELDERIDKVLNEKCSAYTVELGTEVNEFACVVADAVIKTLQPVSELLTPLGIDLDEW  
EPI\_ISL\_426899 23 ITFELDERIDKVLNEKCSAYTVELGTEVNEFACVVADAVIKTLQPVSELLTPLGIDLDEW





EPI\_ISL\_426906 203 QTIEVNSFSGYLKLTQNVYIKNADIVEEAKKVKPTVVVNAANVYLKHGGGVAGALNKATN

|                |      |                        |
|----------------|------|------------------------|
| ORF1ab         | 1081 | NAMQVESDDYIATNGPLKVGGS |
| EPI_ISL_413571 | 263  | NAMQVESDDYIATNGPLKVGGS |
| EPI_ISL_413574 | 263  | NAMQVESDDYIATNGPLKVGGS |
| EPI_ISL_413579 | 263  | NAMQVESDDYIATNGPLKVGGS |
| EPI_ISL_413584 | 263  | NAMQVESDDYIATNGPLKVGGS |
| EPI_ISL_413587 | 263  | NAMQVESDDYIATNGPLKVGGS |
| EPI_ISL_424257 | 263  | NAMQVESDDYIATNGPLKVGGS |
| EPI_ISL_425565 | 263  | NAMQVESDDYIATNGPLKVGGS |
| EPI_ISL_425575 | 263  | NAMQVESDDYIATNGPLKVGGS |
| EPI_ISL_426822 | 263  | NAMQVESDDYIATNGPLKVGGS |
| EPI_ISL_426833 | 263  | NAMQVESDDYIATNGPLKVGGS |
| EPI_ISL_426885 | 263  | NAMQVESDDYIATNGPLKVGGS |
| EPI_ISL_426886 | 263  | NAMQVESDDYIATNGPLKVGGS |
| EPI_ISL_426889 | 263  | NAMQVESDDYIATNGPLKVGGS |
| EPI_ISL_426891 | 263  | NAMQVESDDYIATNGPLKVGGS |
| EPI_ISL_426892 | 263  | NAMQVESDDYIATNGPLKVGGS |
| EPI_ISL_426894 | 263  | NAMQVESDDYIATNGPLKVGGS |
| EPI_ISL_426896 | 263  | NAMQVESDDYIATNGPLKVGGS |
| EPI_ISL_426897 | 263  | NAMQVESDDYIATNGPLKVGGS |
| EPI_ISL_426899 | 263  | NAMQVESDDYIATNGPLKVGGS |
| EPI_ISL_426906 | 263  | NAMQVESDDYIATNGPLKVGGS |

|                |      |                           |
|----------------|------|---------------------------|
| ORF1ab         | 1141 | HEVLLAPLLSAGIFGADPIHSLRVC |
| EPI_ISL_413571 | 323  | HEVLLAPLLSAGIFGADPIHSLRVC |
| EPI_ISL_413574 | 323  | HEVLLAPLLSAGIFGADPIHSLRVC |
| EPI_ISL_413579 | 323  | HEVLLAPLLSAGIFGADPIHSLRVC |
| EPI_ISL_413584 | 323  | HEVLLAPLLSAGIFGADPIHSLRVC |
| EPI_ISL_413587 | 323  | HEVLLAPLLSAGIFGADPIHSLRVC |
| EPI_ISL_424257 | 323  | HEVLLAPLLSAGIFGADPIHSLRVC |
| EPI_ISL_425565 | 323  | HEVLLAPLLSAGIFGADPIHSLRVC |
| EPI_ISL_425575 | 323  | HEVLLAPLLSAGIFGADPIHSLRVC |
| EPI_ISL_426822 | 323  | HEVLLAPLLSAGIFGADPIHSLRVC |
| EPI_ISL_426833 | 323  | HEVLLAPLLSAGIFGADPIHSLRVC |
| EPI_ISL_426885 | 323  | HEVLLAPLLSAGIFGADPIHSLRVC |
| EPI_ISL_426886 | 323  | HEVLLAPLLSAGIFGADPIHSLRVC |
| EPI_ISL_426889 | 323  | HEVLLAPLLSAGIFGADPIHSLRVC |
| EPI_ISL_426891 | 323  | HEVLLAPLLSAGIFGADPIHSLRVC |
| EPI_ISL_426892 | 323  | HEVLLAPLLSAGIFGADPIHSLRVC |
| EPI_ISL_426894 | 323  | HEVLLAPLLSAGIFGADPIHSLRVC |
| EPI_ISL_426896 | 323  | HEVLLAPLLSAGIFGADPIHSLRVC |
| EPI_ISL_426897 | 323  | HEVLLAPLLSAGIFGADPIHSLRVC |
| EPI_ISL_426899 | 323  | HEVLLAPLLSAGIFGADPIHSLRVC |
| EPI_ISL_426906 | 323  | HEVLLAPLLSAGIFGADPIHSLRVC |

|                |      |                             |
|----------------|------|-----------------------------|
| ORF1ab         | 1201 | QKIAEIPKEEVKPFITESKPSVEQRKQ |
| EPI_ISL_413571 | 383  | QKIAEIPKEEVKPFITESKPSVEQRKQ |
| EPI_ISL_413574 | 383  | QKIAEIPKEEVKPFITESKPSVEQRKQ |
| EPI_ISL_413579 | 383  | QKIAEIPKEEVKPFITESKPSVEQRKQ |
| EPI_ISL_413584 | 383  | QKIAEIPKEEVKPFITESKPSVEQRKQ |
| EPI_ISL_413587 | 383  | QKIAEIPKEEVKPFITESKPSVEQRKQ |
| EPI_ISL_424257 | 383  | QKIAEIPKEEVKPFITESKPSVEQRKQ |
| EPI_ISL_425565 | 383  | QKIAEIPKEEVKPFITESKPSVEQRKQ |
| EPI_ISL_425575 | 383  | QKIAEIPKEEVKPFITESKPSVEQRKQ |
| EPI_ISL_426822 | 383  | QKIAEIPKEEVKPFITESKPSVEQRKQ |
| EPI_ISL_426833 | 383  | QKIAEIPKEEVKPFITESKPSVEQRKQ |
| EPI_ISL_426885 | 383  | QKIAEIPKEEVKPFITESKPSVEQRKQ |
| EPI_ISL_426886 | 383  | QKIAEIPKEEVKPFITESKPSVEQRKQ |
| EPI_ISL_426889 | 383  | QKIAEIPKEEVKPFITESKPSVEQRKQ |
| EPI_ISL_426891 | 383  | QKIAEIPKEEVKPFITESKPSVEQRKQ |
| EPI_ISL_426892 | 383  | QKIAEIPKEEVKPFITESKPSVEQRKQ |
| EPI_ISL_426894 | 383  | QKIAEIPKEEVKPFITESKPSVEQRKQ |
| EPI_ISL_426896 | 383  | QKIAEIPKEEVKPFITESKPSVEQRKQ |
| EPI_ISL_426897 | 383  | QKIAEIPKEEVKPFITESKPSVEQRKQ |
| EPI_ISL_426899 | 383  | QKIAEIPKEEVKPFITESKPSVEQRKQ |

EPI\_ISL\_426906 383 QKIAEIPKEEVKPFITESKPSVEQRKQDDKKIKACVEEVTTTLEETKFLTENLLLYIDIN



EPI\_ISL\_426906 563 HAEETRKLMPVCVETKAIVSTIQRKYKGIKIQEGVVDYGARFYFYTSKTTVASLINTLND





EPI\_ISL\_426906 743

SLREVRTIKVFTTVDNINLHTQVVDMSMTYGQQFGPTYLDGADVTKIKPHNSHEGKTFYV



EPI\_ISL\_426906 923 **LDSCRVLNVVCKTCGQQQTTLKGVAVMYMGTLSEYQFKKGVQIPCTCGKQATKYLQQ**



EPI\_ISL\_426906 1103 PNASFDNFKFVCDNIKFADDLNQLTGYKKPASRELKVTFFPDLNGDVVAIDYKHYTPSFK



EPI\_ISL\_426906 1283 **DNSSLTIKKPNELSRVLGLKTLATHGLAAVNSVPWDTIANYAKPFLNKVVSTTTNIVTRC**





EPI\_ISL\_426906 1463 YCTGSIPCSVCLSGLDSDLTYPSELETIQITISSFKWDLTAFGLVAEWFLAYILFTRFFYV



EPI\_ISL\_426906 1643 **GSTFISDEVARDLSLQFKRPINPTDQSSYIVDSVTVKNGSIHLYFDKAGQKTYERHLSH**



EPI\_ISL\_426906 1823 FVDSDVETKDVVECLKLSHQSDIEVTGDSCNNYMLTYNKVENMTPRDLGACIDCSARHIN

|                |      |                                                              |
|----------------|------|--------------------------------------------------------------|
| ORF1ab         | 2701 | AQVAKSHNIALIWNVKDFMSLSEQLRKQIRSAAKKNNLPFKLTCATTRQVVNVVTTKIAL |
| EPI_ISL_413571 | 1883 | AQVAKSHNIALIWNVKDFMSLSEQLRKQIRSAAKKNNLPFKLTCATTRQVVNVVTTKIAL |
| EPI_ISL_413574 | 1883 | AQVAKSHNIALIWNVKDFMSLSEQLRKQIRSAAKKNNLPFKLTCATTRQVVNVVTTKIAL |
| EPI_ISL_413579 | 1883 | AQVAKSHNIALIWNVKDFMSLSEQLRKQIRSAAKKNNLPFKLTCATTRQVVNVVTTKIAL |
| EPI_ISL_413584 | 1883 | AQVAKSHNIALIWNVKDFMSLSEQLRKQIRSAAKKNNLPFKLTCATTRQVVNVVTTKIAL |
| EPI_ISL_413587 | 1883 | AQVAKSHNIALIWNVKDFMSLSEQLRKQIRSAAKKNNLPFKLTCATTRQVVNVVTTKIAL |
| EPI_ISL_424257 | 1883 | AQVAKSHNIALIWNVKDFMSLSEQLRKQIRSAAKKNNLPFKLTCATTRQVVNVVTTKIAL |
| EPI_ISL_425565 | 1883 | AQVAKSHNIALIWNVKDFMSLSEQLRKQIRSAAKKNNLPFKLTCATTRQVVNVVTTKIAL |
| EPI_ISL_425575 | 1883 | AQVAKSHNIALIWNVKDFMSLSEQLRKQIRSAAKKNNLPFKLTCATTRQVVNVVTTKIAL |
| EPI_ISL_426822 | 1883 | AQVAKSHNIALIWNVKDFMSLSEQLRKQIRSAAKKNNLPFKLTCATTRQVVNVVTTKIAL |
| EPI_ISL_426833 | 1883 | AQVAKSHNIALIWNVKDFMSLSEQLRKQIRSAAKKNNLPFKLTCATTRQVVNVVTTKIAL |
| EPI_ISL_426885 | 1883 | AQVAKSHNIALIWNVKDFMSLSEQLRKQIRSAAKKNNLPFKLTCATTRQVVNVVTTKIAL |
| EPI_ISL_426886 | 1883 | AQVAKSHNIALIWNVKDFMSLSEQLRKQIRSAAKKNNLPFKLTCATTRQVVNVVTTKIAL |
| EPI_ISL_426889 | 1883 | AQVAKSHNIALIWNVKDFMSLSEQLRKQIRSAAKKNNLPFKLTCATTRQVVNVVTTKIAL |
| EPI_ISL_426891 | 1883 | AQVAKSHNIALIWNVKDFMSLSEQLRKQIRSAAKKNNLPFKLTCATTRQVVNVVTTKIAL |
| EPI_ISL_426892 | 1883 | AQVAKSHNIALIWNVKDFMSLSEQLRKQIRSAAKKNNLPFKLTCATTRQVVNVVTTKIAL |
| EPI_ISL_426894 | 1883 | AQVAKSHNIALIWNVKDFMSLSEQLRKQIRSAAKKNNLPFKLTCATTRQVVNVVTTKIAL |
| EPI_ISL_426896 | 1883 | AQVAKSHNIALIWNVKDFMSLSEQLRKQIRSAAKKNNLPFKLTCATTRQVVNVVTTKIAL |
| EPI_ISL_426897 | 1883 | AQVAKSHNIALIWNVKDFMSLSEQLRKQIRSAAKKNNLPFKLTCATTRQVVNVVTTKIAL |
| EPI_ISL_426899 | 1883 | AQVAKSHNIALIWNVKDFMSLSEQLRKQIRSAAKKNNLPFKLTCATTRQVVNVVTTKIAL |
| EPI_ISL_426906 | 1883 | AQVAKSHNIALIWNVKDFMSLSEQLRKQIRSAAKKNNLPFKLTCATTRQVVNVVTTKIAL |

|                |      |                                                              |
|----------------|------|--------------------------------------------------------------|
| ORF1ab         | 2761 | KGGKIVNNWLKQLIKVTLVFLFVAAIFYLITPVHVMKHTDFSSSEIIGYKAIDGGVTRDI |
| EPI_ISL_413571 | 1943 | KGG-----                                                     |
| EPI_ISL_413574 | 1943 | KGG-----                                                     |
| EPI_ISL_413579 | 1943 | KGG-----                                                     |
| EPI_ISL_413584 | 1943 | KGG-----                                                     |
| EPI_ISL_413587 | 1943 | KGG-----                                                     |
| EPI_ISL_424257 | 1943 | KGG-----                                                     |
| EPI_ISL_425565 | 1943 | KGG-----                                                     |
| EPI_ISL_425575 | 1943 | KGG-----                                                     |
| EPI_ISL_426822 | 1943 | KGG-----                                                     |
| EPI_ISL_426833 | 1943 | KGG-----                                                     |
| EPI_ISL_426885 | 1943 | KGG-----                                                     |
| EPI_ISL_426886 | 1943 | KGG-----                                                     |
| EPI_ISL_426889 | 1943 | KGG-----                                                     |
| EPI_ISL_426891 | 1943 | KGG-----                                                     |
| EPI_ISL_426892 | 1943 | KGG-----                                                     |
| EPI_ISL_426894 | 1943 | KGG-----                                                     |
| EPI_ISL_426896 | 1943 | KGG-----                                                     |
| EPI_ISL_426897 | 1943 | KGG-----                                                     |
| EPI_ISL_426899 | 1943 | KGG-----                                                     |
| EPI_ISL_426906 | 1943 | KGG-----                                                     |

|                |      |                                                               |
|----------------|------|---------------------------------------------------------------|
| ORF1ab         | 2821 | ASTDTCFANKHADFDTWFSQRGGSYTNDKACPLIAAVITREVG FVVPGLPGTILRTTNGD |
| EPI_ISL_413571 |      | -----                                                         |
| EPI_ISL_413574 |      | -----                                                         |
| EPI_ISL_413579 |      | -----                                                         |
| EPI_ISL_413584 |      | -----                                                         |
| EPI_ISL_413587 |      | -----                                                         |
| EPI_ISL_424257 |      | -----                                                         |
| EPI_ISL_425565 |      | -----                                                         |
| EPI_ISL_425575 |      | -----                                                         |
| EPI_ISL_426822 |      | -----                                                         |
| EPI_ISL_426833 |      | -----                                                         |
| EPI_ISL_426885 |      | -----                                                         |
| EPI_ISL_426886 |      | -----                                                         |
| EPI_ISL_426889 |      | -----                                                         |
| EPI_ISL_426891 |      | -----                                                         |
| EPI_ISL_426892 |      | -----                                                         |
| EPI_ISL_426894 |      | -----                                                         |
| EPI_ISL_426896 |      | -----                                                         |
| EPI_ISL_426897 |      | -----                                                         |
| EPI_ISL_426899 |      | -----                                                         |

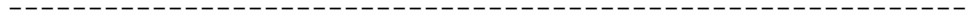



ORF1ab 2881 FLHFLPRVFSAVGNICYTPSKLIEYTDFAVSACVLAAECTIFKDASGKPVPCYDNTNMLE  
EPI\_ISL\_413571 -----  
EPI\_ISL\_413574 -----  
EPI\_ISL\_413579 -----  
EPI\_ISL\_413584 -----  
EPI\_ISL\_413587 -----  
EPI\_ISL\_424257 -----  
EPI\_ISL\_425565 -----  
EPI\_ISL\_425575 -----  
EPI\_ISL\_426822 -----  
EPI\_ISL\_426833 -----  
EPI\_ISL\_426885 -----  
EPI\_ISL\_426886 -----  
EPI\_ISL\_426889 -----  
EPI\_ISL\_426891 -----  
EPI\_ISL\_426892 -----  
EPI\_ISL\_426894 -----  
EPI\_ISL\_426896 -----  
EPI\_ISL\_426897 -----  
EPI\_ISL\_426899 -----  
EPI\_ISL\_426906 -----

ORF1ab 2941 GSVAYESLRPDTRYVLMGDSIIQFPNTYLEGSRVVTTFDSEYCRHGTCTERSEAGVCVST  
EPI\_ISL\_413571 -----  
EPI\_ISL\_413574 -----  
EPI\_ISL\_413579 -----  
EPI\_ISL\_413584 -----  
EPI\_ISL\_413587 -----  
EPI\_ISL\_424257 -----  
EPI\_ISL\_425565 -----  
EPI\_ISL\_425575 -----  
EPI\_ISL\_426822 -----  
EPI\_ISL\_426833 -----  
EPI\_ISL\_426885 -----  
EPI\_ISL\_426886 -----  
EPI\_ISL\_426889 -----  
EPI\_ISL\_426891 -----  
EPI\_ISL\_426892 -----  
EPI\_ISL\_426894 -----  
EPI\_ISL\_426896 -----  
EPI\_ISL\_426897 -----  
EPI\_ISL\_426899 -----  
EPI\_ISL\_426906 -----

ORF1ab 3001 SGRWVLNNDYYRSLPGVFCGVDAVNLLTNMFTPLIQPIGALDISASIVAGGIVAIIVVTCL  
EPI\_ISL\_413571 -----  
EPI\_ISL\_413574 -----  
EPI\_ISL\_413579 -----  
EPI\_ISL\_413584 -----  
EPI\_ISL\_413587 -----  
EPI\_ISL\_424257 -----  
EPI\_ISL\_425565 -----  
EPI\_ISL\_425575 -----  
EPI\_ISL\_426822 -----  
EPI\_ISL\_426833 -----  
EPI\_ISL\_426885 -----  
EPI\_ISL\_426886 -----  
EPI\_ISL\_426889 -----  
EPI\_ISL\_426891 -----  
EPI\_ISL\_426892 -----  
EPI\_ISL\_426894 -----  
EPI\_ISL\_426896 -----  
EPI\_ISL\_426897 -----  
EPI\_ISL\_426899 -----

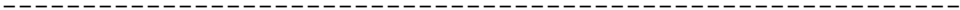

ORF1ab 3061 AYYFMRFRRAFGEYSHVVAFNNTLLFLMSFTVLCLTPVYSFLPGVYSVIYLYLTFYLTNDV  
EPI\_ISL\_413571 -----  
EPI\_ISL\_413574 -----  
EPI\_ISL\_413579 -----  
EPI\_ISL\_413584 -----  
EPI\_ISL\_413587 -----  
EPI\_ISL\_424257 -----  
EPI\_ISL\_425565 -----  
EPI\_ISL\_425575 -----  
EPI\_ISL\_426822 -----  
EPI\_ISL\_426833 -----  
EPI\_ISL\_426885 -----  
EPI\_ISL\_426886 -----  
EPI\_ISL\_426889 -----  
EPI\_ISL\_426891 -----  
EPI\_ISL\_426892 -----  
EPI\_ISL\_426894 -----  
EPI\_ISL\_426896 -----  
EPI\_ISL\_426897 -----  
EPI\_ISL\_426899 -----  
EPI\_ISL\_426906 -----

ORF1ab 3121 SFLAHIQWMVMFTPLVPFWITIAIYIICISTKHFYWFFSNYLKRRVVFNGVSFSTFEEAAL  
EPI\_ISL\_413571 -----  
EPI\_ISL\_413574 -----  
EPI\_ISL\_413579 -----  
EPI\_ISL\_413584 -----  
EPI\_ISL\_413587 -----  
EPI\_ISL\_424257 -----  
EPI\_ISL\_425565 -----  
EPI\_ISL\_425575 -----  
EPI\_ISL\_426822 -----  
EPI\_ISL\_426833 -----  
EPI\_ISL\_426885 -----  
EPI\_ISL\_426886 -----  
EPI\_ISL\_426889 -----  
EPI\_ISL\_426891 -----  
EPI\_ISL\_426892 -----  
EPI\_ISL\_426894 -----  
EPI\_ISL\_426896 -----  
EPI\_ISL\_426897 -----  
EPI\_ISL\_426899 -----  
EPI\_ISL\_426906 -----

ORF1ab 3181 CTFLLNKEMYLKLRSDVLLPLTQYNRYLALYNKYKYFSGAMDTTSYREAACCHLAKALND  
EPI\_ISL\_413571 -----  
EPI\_ISL\_413574 -----  
EPI\_ISL\_413579 -----  
EPI\_ISL\_413584 -----  
EPI\_ISL\_413587 -----  
EPI\_ISL\_424257 -----  
EPI\_ISL\_425565 -----  
EPI\_ISL\_425575 -----  
EPI\_ISL\_426822 -----  
EPI\_ISL\_426833 -----  
EPI\_ISL\_426885 -----  
EPI\_ISL\_426886 -----  
EPI\_ISL\_426889 -----  
EPI\_ISL\_426891 -----  
EPI\_ISL\_426892 -----  
EPI\_ISL\_426894 -----  
EPI\_ISL\_426896 -----  
EPI\_ISL\_426897 -----  
EPI\_ISL\_426899 -----



ORF1ab 3241 FSNSGSDVLYQPPQTSITSAVLQSGFRKMAFPSGKVEGCMVQVTCGTTTTLNLGLWLDVVY  
EPI\_ISL\_413571 -----  
EPI\_ISL\_413574 -----  
EPI\_ISL\_413579 -----  
EPI\_ISL\_413584 -----  
EPI\_ISL\_413587 -----  
EPI\_ISL\_424257 -----  
EPI\_ISL\_425565 -----  
EPI\_ISL\_425575 -----  
EPI\_ISL\_426822 -----  
EPI\_ISL\_426833 -----  
EPI\_ISL\_426885 -----  
EPI\_ISL\_426886 -----  
EPI\_ISL\_426889 -----  
EPI\_ISL\_426891 -----  
EPI\_ISL\_426892 -----  
EPI\_ISL\_426894 -----  
EPI\_ISL\_426896 -----  
EPI\_ISL\_426897 -----  
EPI\_ISL\_426899 -----  
EPI\_ISL\_426906 -----

ORF1ab 3301 CPRHVICTSEDMLNPNYEDLLIRKSNHNFLVQAGNVQLRVIGHSMQNCVCLKKVD TANPK  
EPI\_ISL\_413571 -----  
EPI\_ISL\_413574 -----  
EPI\_ISL\_413579 -----  
EPI\_ISL\_413584 -----  
EPI\_ISL\_413587 -----  
EPI\_ISL\_424257 -----  
EPI\_ISL\_425565 -----  
EPI\_ISL\_425575 -----  
EPI\_ISL\_426822 -----  
EPI\_ISL\_426833 -----  
EPI\_ISL\_426885 -----  
EPI\_ISL\_426886 -----  
EPI\_ISL\_426889 -----  
EPI\_ISL\_426891 -----  
EPI\_ISL\_426892 -----  
EPI\_ISL\_426894 -----  
EPI\_ISL\_426896 -----  
EPI\_ISL\_426897 -----  
EPI\_ISL\_426899 -----  
EPI\_ISL\_426906 -----

ORF1ab 3361 TPKYKFVRIQPGQTF SVLACYNGSPSGVYQCAMRPNFTIKGSFLNGSCGSVGFNIDYDCV  
EPI\_ISL\_413571 -----  
EPI\_ISL\_413574 -----  
EPI\_ISL\_413579 -----  
EPI\_ISL\_413584 -----  
EPI\_ISL\_413587 -----  
EPI\_ISL\_424257 -----  
EPI\_ISL\_425565 -----  
EPI\_ISL\_425575 -----  
EPI\_ISL\_426822 -----  
EPI\_ISL\_426833 -----  
EPI\_ISL\_426885 -----  
EPI\_ISL\_426886 -----  
EPI\_ISL\_426889 -----  
EPI\_ISL\_426891 -----  
EPI\_ISL\_426892 -----  
EPI\_ISL\_426894 -----  
EPI\_ISL\_426896 -----  
EPI\_ISL\_426897 -----  
EPI\_ISL\_426899 -----

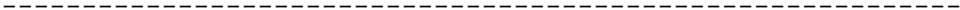

ORF1ab 3421 SFCYMHMELPTGVHAGTDLEGNFYGFVDRQTAQAAGTDTTITVNVLAWLYAAVINGDR  
EPI\_ISL\_413571 -----  
EPI\_ISL\_413574 -----  
EPI\_ISL\_413579 -----  
EPI\_ISL\_413584 -----  
EPI\_ISL\_413587 -----  
EPI\_ISL\_424257 -----  
EPI\_ISL\_425565 -----  
EPI\_ISL\_425575 -----  
EPI\_ISL\_426822 -----  
EPI\_ISL\_426833 -----  
EPI\_ISL\_426885 -----  
EPI\_ISL\_426886 -----  
EPI\_ISL\_426889 -----  
EPI\_ISL\_426891 -----  
EPI\_ISL\_426892 -----  
EPI\_ISL\_426894 -----  
EPI\_ISL\_426896 -----  
EPI\_ISL\_426897 -----  
EPI\_ISL\_426899 -----  
EPI\_ISL\_426906 -----

ORF1ab 3481 WFLNRF'TTTLNDFNLVAMKYNYEPLTQDHVDILGPLSAQTGI AVLDMCASLKELLQNGMN  
EPI\_ISL\_413571 -----  
EPI\_ISL\_413574 -----  
EPI\_ISL\_413579 -----  
EPI\_ISL\_413584 -----  
EPI\_ISL\_413587 -----  
EPI\_ISL\_424257 -----  
EPI\_ISL\_425565 -----  
EPI\_ISL\_425575 -----  
EPI\_ISL\_426822 -----  
EPI\_ISL\_426833 -----  
EPI\_ISL\_426885 -----  
EPI\_ISL\_426886 -----  
EPI\_ISL\_426889 -----  
EPI\_ISL\_426891 -----  
EPI\_ISL\_426892 -----  
EPI\_ISL\_426894 -----  
EPI\_ISL\_426896 -----  
EPI\_ISL\_426897 -----  
EPI\_ISL\_426899 -----  
EPI\_ISL\_426906 -----

ORF1ab 3541 GRTILGSALLEDEFTPFVVRQCSGVTFQSAVKRTIKGTHHWLLLLTILTSLLVLVQSTQW  
EPI\_ISL\_413571 -----  
EPI\_ISL\_413574 -----  
EPI\_ISL\_413579 -----  
EPI\_ISL\_413584 -----  
EPI\_ISL\_413587 -----  
EPI\_ISL\_424257 -----  
EPI\_ISL\_425565 -----  
EPI\_ISL\_425575 -----  
EPI\_ISL\_426822 -----  
EPI\_ISL\_426833 -----  
EPI\_ISL\_426885 -----  
EPI\_ISL\_426886 -----  
EPI\_ISL\_426889 -----  
EPI\_ISL\_426891 -----  
EPI\_ISL\_426892 -----  
EPI\_ISL\_426894 -----  
EPI\_ISL\_426896 -----  
EPI\_ISL\_426897 -----  
EPI\_ISL\_426899 -----

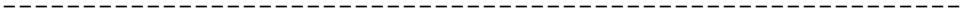



ORF1ab 3601 SLFFFLYENAFPLPFAMGIIAMSAFAMMFVKHKHAFLLCLFLLPSSLATVAYFNMVYMPASWV  
EPI\_ISL\_413571 -----  
EPI\_ISL\_413574 -----  
EPI\_ISL\_413579 -----  
EPI\_ISL\_413584 -----  
EPI\_ISL\_413587 -----  
EPI\_ISL\_424257 -----  
EPI\_ISL\_425565 -----  
EPI\_ISL\_425575 -----  
EPI\_ISL\_426822 -----  
EPI\_ISL\_426833 -----  
EPI\_ISL\_426885 -----  
EPI\_ISL\_426886 -----  
EPI\_ISL\_426889 -----  
EPI\_ISL\_426891 -----  
EPI\_ISL\_426892 -----  
EPI\_ISL\_426894 -----  
EPI\_ISL\_426896 -----  
EPI\_ISL\_426897 -----  
EPI\_ISL\_426899 -----  
EPI\_ISL\_426906 -----

ORF1ab 3661 MRIMTWLDMVDTSLSGFKLKDCVMYASAVVLLILMTARTVYDDGARRVWTLMNVLTLVYK  
EPI\_ISL\_413571 -----  
EPI\_ISL\_413574 -----  
EPI\_ISL\_413579 -----  
EPI\_ISL\_413584 -----  
EPI\_ISL\_413587 -----  
EPI\_ISL\_424257 -----  
EPI\_ISL\_425565 -----  
EPI\_ISL\_425575 -----  
EPI\_ISL\_426822 -----  
EPI\_ISL\_426833 -----  
EPI\_ISL\_426885 -----  
EPI\_ISL\_426886 -----  
EPI\_ISL\_426889 -----  
EPI\_ISL\_426891 -----  
EPI\_ISL\_426892 -----  
EPI\_ISL\_426894 -----  
EPI\_ISL\_426896 -----  
EPI\_ISL\_426897 -----  
EPI\_ISL\_426899 -----  
EPI\_ISL\_426906 -----

ORF1ab 3721 VYIGNALDQAISMWALIIISVTSNYSQVVTVMFLARGIVFMCVEYCPPIFFITGNTLQCIM  
EPI\_ISL\_413571 -----  
EPI\_ISL\_413574 -----  
EPI\_ISL\_413579 -----  
EPI\_ISL\_413584 -----  
EPI\_ISL\_413587 -----  
EPI\_ISL\_424257 -----  
EPI\_ISL\_425565 -----  
EPI\_ISL\_425575 -----  
EPI\_ISL\_426822 -----  
EPI\_ISL\_426833 -----  
EPI\_ISL\_426885 -----  
EPI\_ISL\_426886 -----  
EPI\_ISL\_426889 -----  
EPI\_ISL\_426891 -----  
EPI\_ISL\_426892 -----  
EPI\_ISL\_426894 -----  
EPI\_ISL\_426896 -----  
EPI\_ISL\_426897 -----  
EPI\_ISL\_426899 -----



ORF1ab 3781 LVYCFLGYFCTCYFGLFCLLNRYFRLTLGVYDYLSTQEFYRMYNSQGLLPPKNSIDAFKL  
EPI\_ISL\_413571 -----  
EPI\_ISL\_413574 -----  
EPI\_ISL\_413579 -----  
EPI\_ISL\_413584 -----  
EPI\_ISL\_413587 -----  
EPI\_ISL\_424257 -----  
EPI\_ISL\_425565 -----  
EPI\_ISL\_425575 -----  
EPI\_ISL\_426822 -----  
EPI\_ISL\_426833 -----  
EPI\_ISL\_426885 -----  
EPI\_ISL\_426886 -----  
EPI\_ISL\_426889 -----  
EPI\_ISL\_426891 -----  
EPI\_ISL\_426892 -----  
EPI\_ISL\_426894 -----  
EPI\_ISL\_426896 -----  
EPI\_ISL\_426897 -----  
EPI\_ISL\_426899 -----  
EPI\_ISL\_426906 -----

ORF1ab 3841 NIKLLGVGGKPCIKVATVQSKMSDVKCTSVVLLSVLQQLRVESSSKLWAQCVQLHNDILL  
EPI\_ISL\_413571 -----  
EPI\_ISL\_413574 -----  
EPI\_ISL\_413579 -----  
EPI\_ISL\_413584 -----  
EPI\_ISL\_413587 -----  
EPI\_ISL\_424257 -----  
EPI\_ISL\_425565 -----  
EPI\_ISL\_425575 -----  
EPI\_ISL\_426822 -----  
EPI\_ISL\_426833 -----  
EPI\_ISL\_426885 -----  
EPI\_ISL\_426886 -----  
EPI\_ISL\_426889 -----  
EPI\_ISL\_426891 -----  
EPI\_ISL\_426892 -----  
EPI\_ISL\_426894 -----  
EPI\_ISL\_426896 -----  
EPI\_ISL\_426897 -----  
EPI\_ISL\_426899 -----  
EPI\_ISL\_426906 -----

ORF1ab 3901 AKDTTEAFEKMVSLLSVLLSMQGAVDINKLCEEMLDNRATLQAIASEFSSLPSYAAFATA  
EPI\_ISL\_413571 -----  
EPI\_ISL\_413574 -----  
EPI\_ISL\_413579 -----  
EPI\_ISL\_413584 -----  
EPI\_ISL\_413587 -----  
EPI\_ISL\_424257 -----  
EPI\_ISL\_425565 -----  
EPI\_ISL\_425575 -----  
EPI\_ISL\_426822 -----  
EPI\_ISL\_426833 -----  
EPI\_ISL\_426885 -----  
EPI\_ISL\_426886 -----  
EPI\_ISL\_426889 -----  
EPI\_ISL\_426891 -----  
EPI\_ISL\_426892 -----  
EPI\_ISL\_426894 -----  
EPI\_ISL\_426896 -----  
EPI\_ISL\_426897 -----  
EPI\_ISL\_426899 -----



ORF1ab 3961 QEAYEQAVANGDSEVVLKLLKSLNVAKSEFDRDAAMQRKLEKMDAQAMTQMYKQARSED  
EPI\_ISL\_413571 -----  
EPI\_ISL\_413574 -----  
EPI\_ISL\_413579 -----  
EPI\_ISL\_413584 -----  
EPI\_ISL\_413587 -----  
EPI\_ISL\_424257 -----  
EPI\_ISL\_425565 -----  
EPI\_ISL\_425575 -----  
EPI\_ISL\_426822 -----  
EPI\_ISL\_426833 -----  
EPI\_ISL\_426885 -----  
EPI\_ISL\_426886 -----  
EPI\_ISL\_426889 -----  
EPI\_ISL\_426891 -----  
EPI\_ISL\_426892 -----  
EPI\_ISL\_426894 -----  
EPI\_ISL\_426896 -----  
EPI\_ISL\_426897 -----  
EPI\_ISL\_426899 -----  
EPI\_ISL\_426906 -----

ORF1ab 4021 KRAKVTSAMQTMLEFTMLRKLNDALNNIINNARDGCVPLNIIPLTTAAKLMVVI PDYNTY  
EPI\_ISL\_413571 -----  
EPI\_ISL\_413574 -----  
EPI\_ISL\_413579 -----  
EPI\_ISL\_413584 -----  
EPI\_ISL\_413587 -----  
EPI\_ISL\_424257 -----  
EPI\_ISL\_425565 -----  
EPI\_ISL\_425575 -----  
EPI\_ISL\_426822 -----  
EPI\_ISL\_426833 -----  
EPI\_ISL\_426885 -----  
EPI\_ISL\_426886 -----  
EPI\_ISL\_426889 -----  
EPI\_ISL\_426891 -----  
EPI\_ISL\_426892 -----  
EPI\_ISL\_426894 -----  
EPI\_ISL\_426896 -----  
EPI\_ISL\_426897 -----  
EPI\_ISL\_426899 -----  
EPI\_ISL\_426906 -----

ORF1ab 4081 KNTCDGTTFTYASALWEIQVVDADSKIVQLSEISMDNSPNLAWPLIVTALRANSVAVKLQ  
EPI\_ISL\_413571 -----  
EPI\_ISL\_413574 -----  
EPI\_ISL\_413579 -----  
EPI\_ISL\_413584 -----  
EPI\_ISL\_413587 -----  
EPI\_ISL\_424257 -----  
EPI\_ISL\_425565 -----  
EPI\_ISL\_425575 -----  
EPI\_ISL\_426822 -----  
EPI\_ISL\_426833 -----  
EPI\_ISL\_426885 -----  
EPI\_ISL\_426886 -----  
EPI\_ISL\_426889 -----  
EPI\_ISL\_426891 -----  
EPI\_ISL\_426892 -----  
EPI\_ISL\_426894 -----  
EPI\_ISL\_426896 -----  
EPI\_ISL\_426897 -----  
EPI\_ISL\_426899 -----



ORF1ab 4141 NNELSPVALRQMSCAAGTTQTACTDDNALAYNNTTKGGRFVLALLSDLQDLKWARFPKSD  
EPI\_ISL\_413571 -----  
EPI\_ISL\_413574 -----  
EPI\_ISL\_413579 -----  
EPI\_ISL\_413584 -----  
EPI\_ISL\_413587 -----  
EPI\_ISL\_424257 -----  
EPI\_ISL\_425565 -----  
EPI\_ISL\_425575 -----  
EPI\_ISL\_426822 -----  
EPI\_ISL\_426833 -----  
EPI\_ISL\_426885 -----  
EPI\_ISL\_426886 -----  
EPI\_ISL\_426889 -----  
EPI\_ISL\_426891 -----  
EPI\_ISL\_426892 -----  
EPI\_ISL\_426894 -----  
EPI\_ISL\_426896 -----  
EPI\_ISL\_426897 -----  
EPI\_ISL\_426899 -----  
EPI\_ISL\_426906 -----

ORF1ab 4201 GTGTIYTELEPPCRFVTDTPKGPVKYLYFIKGLNNLNRMVGLGSLAATVRLQAGNATEV  
EPI\_ISL\_413571 -----  
EPI\_ISL\_413574 -----  
EPI\_ISL\_413579 -----  
EPI\_ISL\_413584 -----  
EPI\_ISL\_413587 -----  
EPI\_ISL\_424257 -----  
EPI\_ISL\_425565 -----  
EPI\_ISL\_425575 -----  
EPI\_ISL\_426822 -----  
EPI\_ISL\_426833 -----  
EPI\_ISL\_426885 -----  
EPI\_ISL\_426886 -----  
EPI\_ISL\_426889 -----  
EPI\_ISL\_426891 -----  
EPI\_ISL\_426892 -----  
EPI\_ISL\_426894 -----  
EPI\_ISL\_426896 -----  
EPI\_ISL\_426897 -----  
EPI\_ISL\_426899 -----  
EPI\_ISL\_426906 -----

ORF1ab 4261 PANSTVLSFCAFAVDAAKAYKDYLASGGQPITNCVKMLCTHTGTGQAITVTPEANMDQES  
EPI\_ISL\_413571 -----  
EPI\_ISL\_413574 -----  
EPI\_ISL\_413579 -----  
EPI\_ISL\_413584 -----  
EPI\_ISL\_413587 -----  
EPI\_ISL\_424257 -----  
EPI\_ISL\_425565 -----  
EPI\_ISL\_425575 -----  
EPI\_ISL\_426822 -----  
EPI\_ISL\_426833 -----  
EPI\_ISL\_426885 -----  
EPI\_ISL\_426886 -----  
EPI\_ISL\_426889 -----  
EPI\_ISL\_426891 -----  
EPI\_ISL\_426892 -----  
EPI\_ISL\_426894 -----  
EPI\_ISL\_426896 -----  
EPI\_ISL\_426897 -----  
EPI\_ISL\_426899 -----





ORF1ab 4321 FGGASCCLYCRCHIDHPNPKGFCDLKGKYVQIPTTCANDPVGFTLKNNTVCTVCGMWKGYG  
EPI\_ISL\_413571 -----  
EPI\_ISL\_413574 -----  
EPI\_ISL\_413579 -----  
EPI\_ISL\_413584 -----  
EPI\_ISL\_413587 -----  
EPI\_ISL\_424257 -----  
EPI\_ISL\_425565 -----  
EPI\_ISL\_425575 -----  
EPI\_ISL\_426822 -----  
EPI\_ISL\_426833 -----  
EPI\_ISL\_426885 -----  
EPI\_ISL\_426886 -----  
EPI\_ISL\_426889 -----  
EPI\_ISL\_426891 -----  
EPI\_ISL\_426892 -----  
EPI\_ISL\_426894 -----  
EPI\_ISL\_426896 -----  
EPI\_ISL\_426897 -----  
EPI\_ISL\_426899 -----  
EPI\_ISL\_426906 -----

ORF1ab 4381 CSCDQLREPLQSDAQSFLNRVCGVSAARLTPCGTGTSTDVVYRAFDIYNDKVAGFAKF  
EPI\_ISL\_413571 -----  
EPI\_ISL\_413574 -----  
EPI\_ISL\_413579 -----  
EPI\_ISL\_413584 -----  
EPI\_ISL\_413587 -----  
EPI\_ISL\_424257 -----  
EPI\_ISL\_425565 -----  
EPI\_ISL\_425575 -----  
EPI\_ISL\_426822 -----  
EPI\_ISL\_426833 -----  
EPI\_ISL\_426885 -----  
EPI\_ISL\_426886 -----  
EPI\_ISL\_426889 -----  
EPI\_ISL\_426891 -----  
EPI\_ISL\_426892 -----  
EPI\_ISL\_426894 -----  
EPI\_ISL\_426896 -----  
EPI\_ISL\_426897 -----  
EPI\_ISL\_426899 -----  
EPI\_ISL\_426906 -----

ORF1ab 4441 LKTNCCRFQEKDEDDNLI DSYFVVKRHTFSNYQHEETIYNLLKDCPAVAKHDFKFRIDG  
EPI\_ISL\_413571 -----  
EPI\_ISL\_413574 -----  
EPI\_ISL\_413579 -----  
EPI\_ISL\_413584 -----  
EPI\_ISL\_413587 -----  
EPI\_ISL\_424257 -----  
EPI\_ISL\_425565 -----  
EPI\_ISL\_425575 -----  
EPI\_ISL\_426822 -----  
EPI\_ISL\_426833 -----  
EPI\_ISL\_426885 -----  
EPI\_ISL\_426886 -----  
EPI\_ISL\_426889 -----  
EPI\_ISL\_426891 -----  
EPI\_ISL\_426892 -----  
EPI\_ISL\_426894 -----  
EPI\_ISL\_426896 -----  
EPI\_ISL\_426897 -----  
EPI\_ISL\_426899 -----



ORF1ab 4501 DMVPHISRQRLTKYTMADLVYALRHFDEGNCDTLKEILVTYNCCDDDYFNKKDWYDFVEN  
EPI\_ISL\_413571 -----  
EPI\_ISL\_413574 -----  
EPI\_ISL\_413579 -----  
EPI\_ISL\_413584 -----  
EPI\_ISL\_413587 -----  
EPI\_ISL\_424257 -----  
EPI\_ISL\_425565 -----  
EPI\_ISL\_425575 -----  
EPI\_ISL\_426822 -----  
EPI\_ISL\_426833 -----  
EPI\_ISL\_426885 -----  
EPI\_ISL\_426886 -----  
EPI\_ISL\_426889 -----  
EPI\_ISL\_426891 -----  
EPI\_ISL\_426892 -----  
EPI\_ISL\_426894 -----  
EPI\_ISL\_426896 -----  
EPI\_ISL\_426897 -----  
EPI\_ISL\_426899 -----  
EPI\_ISL\_426906 -----

ORF1ab 4561 PDILRVYANLGERVRQALLKTIVQFCDAMRNAGIVGVLTLDNQDLNGNWDYDFGDFIQTTTPG  
EPI\_ISL\_413571 -----  
EPI\_ISL\_413574 -----  
EPI\_ISL\_413579 -----  
EPI\_ISL\_413584 -----  
EPI\_ISL\_413587 -----  
EPI\_ISL\_424257 -----  
EPI\_ISL\_425565 -----  
EPI\_ISL\_425575 -----  
EPI\_ISL\_426822 -----  
EPI\_ISL\_426833 -----  
EPI\_ISL\_426885 -----  
EPI\_ISL\_426886 -----  
EPI\_ISL\_426889 -----  
EPI\_ISL\_426891 -----  
EPI\_ISL\_426892 -----  
EPI\_ISL\_426894 -----  
EPI\_ISL\_426896 -----  
EPI\_ISL\_426897 -----  
EPI\_ISL\_426899 -----  
EPI\_ISL\_426906 -----

ORF1ab 4621 SGVPVVDSSYSLMLPILTLTRALTAESHVDTDLTKPYIKWDLKLYDFTEERLKLFDRYFK  
EPI\_ISL\_413571 -----  
EPI\_ISL\_413574 -----  
EPI\_ISL\_413579 -----  
EPI\_ISL\_413584 -----  
EPI\_ISL\_413587 -----  
EPI\_ISL\_424257 -----  
EPI\_ISL\_425565 -----  
EPI\_ISL\_425575 -----  
EPI\_ISL\_426822 -----  
EPI\_ISL\_426833 -----  
EPI\_ISL\_426885 -----  
EPI\_ISL\_426886 -----  
EPI\_ISL\_426889 -----  
EPI\_ISL\_426891 -----  
EPI\_ISL\_426892 -----  
EPI\_ISL\_426894 -----  
EPI\_ISL\_426896 -----  
EPI\_ISL\_426897 -----  
EPI\_ISL\_426899 -----



ORF1ab 4681 YWDQTYHPNCVNCLDDRCILHCANFNVLVSTVFPPTSFGPLVVRKIFVDGVPFVVSTGYHF  
EPI\_ISL\_413571 -----  
EPI\_ISL\_413574 -----  
EPI\_ISL\_413579 -----  
EPI\_ISL\_413584 -----  
EPI\_ISL\_413587 -----  
EPI\_ISL\_424257 -----  
EPI\_ISL\_425565 -----  
EPI\_ISL\_425575 -----  
EPI\_ISL\_426822 -----  
EPI\_ISL\_426833 -----  
EPI\_ISL\_426885 -----  
EPI\_ISL\_426886 -----  
EPI\_ISL\_426889 -----  
EPI\_ISL\_426891 -----  
EPI\_ISL\_426892 -----  
EPI\_ISL\_426894 -----  
EPI\_ISL\_426896 -----  
EPI\_ISL\_426897 -----  
EPI\_ISL\_426899 -----  
EPI\_ISL\_426906 -----

ORF1ab 4741 RELGVVHNQDVNLHSSRSLSFKELLVYAADPAMHAASGNLLLDKRTTCFSVAALTNNVAFQ  
EPI\_ISL\_413571 -----  
EPI\_ISL\_413574 -----  
EPI\_ISL\_413579 -----  
EPI\_ISL\_413584 -----  
EPI\_ISL\_413587 -----  
EPI\_ISL\_424257 -----  
EPI\_ISL\_425565 -----  
EPI\_ISL\_425575 -----  
EPI\_ISL\_426822 -----  
EPI\_ISL\_426833 -----  
EPI\_ISL\_426885 -----  
EPI\_ISL\_426886 -----  
EPI\_ISL\_426889 -----  
EPI\_ISL\_426891 -----  
EPI\_ISL\_426892 -----  
EPI\_ISL\_426894 -----  
EPI\_ISL\_426896 -----  
EPI\_ISL\_426897 -----  
EPI\_ISL\_426899 -----  
EPI\_ISL\_426906 -----

ORF1ab 4801 TVKPGNFKDFYDFAVSKGFFKEGSSVELKHFFFAQDGNAAISDYDYRYNLPTMCDIRQ  
EPI\_ISL\_413571 -----  
EPI\_ISL\_413574 -----  
EPI\_ISL\_413579 -----  
EPI\_ISL\_413584 -----  
EPI\_ISL\_413587 -----  
EPI\_ISL\_424257 -----  
EPI\_ISL\_425565 -----  
EPI\_ISL\_425575 -----  
EPI\_ISL\_426822 -----  
EPI\_ISL\_426833 -----  
EPI\_ISL\_426885 -----  
EPI\_ISL\_426886 -----  
EPI\_ISL\_426889 -----  
EPI\_ISL\_426891 -----  
EPI\_ISL\_426892 -----  
EPI\_ISL\_426894 -----  
EPI\_ISL\_426896 -----  
EPI\_ISL\_426897 -----  
EPI\_ISL\_426899 -----



ORF1ab 4861 LLFVVEVVDKYFDCYDGGCINANQVIVNNLDKSAGFPFNKWKARLYYDSMSYEDQDALF  
EPI\_ISL\_413571 -----  
EPI\_ISL\_413574 -----  
EPI\_ISL\_413579 -----  
EPI\_ISL\_413584 -----  
EPI\_ISL\_413587 -----  
EPI\_ISL\_424257 -----  
EPI\_ISL\_425565 -----  
EPI\_ISL\_425575 -----  
EPI\_ISL\_426822 -----  
EPI\_ISL\_426833 -----  
EPI\_ISL\_426885 -----  
EPI\_ISL\_426886 -----  
EPI\_ISL\_426889 -----  
EPI\_ISL\_426891 -----  
EPI\_ISL\_426892 -----  
EPI\_ISL\_426894 -----  
EPI\_ISL\_426896 -----  
EPI\_ISL\_426897 -----  
EPI\_ISL\_426899 -----  
EPI\_ISL\_426906 -----

ORF1ab 4921 AYTKRNVIPTITQMNLKYAISAKNRARTVAGVSICTMTNRQFHQKLLKSLAATRGTAVV  
EPI\_ISL\_413571 -----  
EPI\_ISL\_413574 -----  
EPI\_ISL\_413579 -----  
EPI\_ISL\_413584 -----  
EPI\_ISL\_413587 -----  
EPI\_ISL\_424257 -----  
EPI\_ISL\_425565 -----  
EPI\_ISL\_425575 -----  
EPI\_ISL\_426822 -----  
EPI\_ISL\_426833 -----  
EPI\_ISL\_426885 -----  
EPI\_ISL\_426886 -----  
EPI\_ISL\_426889 -----  
EPI\_ISL\_426891 -----  
EPI\_ISL\_426892 -----  
EPI\_ISL\_426894 -----  
EPI\_ISL\_426896 -----  
EPI\_ISL\_426897 -----  
EPI\_ISL\_426899 -----  
EPI\_ISL\_426906 -----

ORF1ab 4981 IGTSKFYGGWHNMLKTVYSDVENPHLMGWDYPKCDRAMPNMLRIMASLVLARKHTTCCSL  
EPI\_ISL\_413571 -----  
EPI\_ISL\_413574 -----  
EPI\_ISL\_413579 -----  
EPI\_ISL\_413584 -----  
EPI\_ISL\_413587 -----  
EPI\_ISL\_424257 -----  
EPI\_ISL\_425565 -----  
EPI\_ISL\_425575 -----  
EPI\_ISL\_426822 -----  
EPI\_ISL\_426833 -----  
EPI\_ISL\_426885 -----  
EPI\_ISL\_426886 -----  
EPI\_ISL\_426889 -----  
EPI\_ISL\_426891 -----  
EPI\_ISL\_426892 -----  
EPI\_ISL\_426894 -----  
EPI\_ISL\_426896 -----  
EPI\_ISL\_426897 -----  
EPI\_ISL\_426899 -----





ORF1ab 5041 SHRFYRLANECAQVLSEMVMCGGSLYVKPGGTSSGDATTAYANSVFNICQAVTANVNALL  
EPI\_ISL\_413571 -----  
EPI\_ISL\_413574 -----  
EPI\_ISL\_413579 -----  
EPI\_ISL\_413584 -----  
EPI\_ISL\_413587 -----  
EPI\_ISL\_424257 -----  
EPI\_ISL\_425565 -----  
EPI\_ISL\_425575 -----  
EPI\_ISL\_426822 -----  
EPI\_ISL\_426833 -----  
EPI\_ISL\_426885 -----  
EPI\_ISL\_426886 -----  
EPI\_ISL\_426889 -----  
EPI\_ISL\_426891 -----  
EPI\_ISL\_426892 -----  
EPI\_ISL\_426894 -----  
EPI\_ISL\_426896 -----  
EPI\_ISL\_426897 -----  
EPI\_ISL\_426899 -----  
EPI\_ISL\_426906 -----

ORF1ab 5101 STDGNKIADKYVRNLQHRLYECLYRNRDVDTDFVNEFYAYLRKHFSSMILSDDAVVCFNS  
EPI\_ISL\_413571 -----  
EPI\_ISL\_413574 -----  
EPI\_ISL\_413579 -----  
EPI\_ISL\_413584 -----  
EPI\_ISL\_413587 -----  
EPI\_ISL\_424257 -----  
EPI\_ISL\_425565 -----  
EPI\_ISL\_425575 -----  
EPI\_ISL\_426822 -----  
EPI\_ISL\_426833 -----  
EPI\_ISL\_426885 -----  
EPI\_ISL\_426886 -----  
EPI\_ISL\_426889 -----  
EPI\_ISL\_426891 -----  
EPI\_ISL\_426892 -----  
EPI\_ISL\_426894 -----  
EPI\_ISL\_426896 -----  
EPI\_ISL\_426897 -----  
EPI\_ISL\_426899 -----  
EPI\_ISL\_426906 -----

ORF1ab 5161 TYASQGLVASIKNFKSVLYYQNNVFMSEAKCWTETDLTKGPHEFCSQHTMLVKQGDDYVY  
EPI\_ISL\_413571 -----  
EPI\_ISL\_413574 -----  
EPI\_ISL\_413579 -----  
EPI\_ISL\_413584 -----  
EPI\_ISL\_413587 -----  
EPI\_ISL\_424257 -----  
EPI\_ISL\_425565 -----  
EPI\_ISL\_425575 -----  
EPI\_ISL\_426822 -----  
EPI\_ISL\_426833 -----  
EPI\_ISL\_426885 -----  
EPI\_ISL\_426886 -----  
EPI\_ISL\_426889 -----  
EPI\_ISL\_426891 -----  
EPI\_ISL\_426892 -----  
EPI\_ISL\_426894 -----  
EPI\_ISL\_426896 -----  
EPI\_ISL\_426897 -----  
EPI\_ISL\_426899 -----



ORF1ab 5221 LPYPDPSRILGAGCFVDDIVKTDGTLMIERFVSLAIDAYPLTKHPNQEYADVFLHLYLQYI  
EPI\_ISL\_413571 -----  
EPI\_ISL\_413574 -----  
EPI\_ISL\_413579 -----  
EPI\_ISL\_413584 -----  
EPI\_ISL\_413587 -----  
EPI\_ISL\_424257 -----  
EPI\_ISL\_425565 -----  
EPI\_ISL\_425575 -----  
EPI\_ISL\_426822 -----  
EPI\_ISL\_426833 -----  
EPI\_ISL\_426885 -----  
EPI\_ISL\_426886 -----  
EPI\_ISL\_426889 -----  
EPI\_ISL\_426891 -----  
EPI\_ISL\_426892 -----  
EPI\_ISL\_426894 -----  
EPI\_ISL\_426896 -----  
EPI\_ISL\_426897 -----  
EPI\_ISL\_426899 -----  
EPI\_ISL\_426906 -----

ORF1ab 5281 RKLHDELGTGHMLDMYSVMLTNDNTSRYWEPEFYEAMYTPHTVLQAVGACVLCNSQTSLRC  
EPI\_ISL\_413571 -----  
EPI\_ISL\_413574 -----  
EPI\_ISL\_413579 -----  
EPI\_ISL\_413584 -----  
EPI\_ISL\_413587 -----  
EPI\_ISL\_424257 -----  
EPI\_ISL\_425565 -----  
EPI\_ISL\_425575 -----  
EPI\_ISL\_426822 -----  
EPI\_ISL\_426833 -----  
EPI\_ISL\_426885 -----  
EPI\_ISL\_426886 -----  
EPI\_ISL\_426889 -----  
EPI\_ISL\_426891 -----  
EPI\_ISL\_426892 -----  
EPI\_ISL\_426894 -----  
EPI\_ISL\_426896 -----  
EPI\_ISL\_426897 -----  
EPI\_ISL\_426899 -----  
EPI\_ISL\_426906 -----

ORF1ab 5341 GACIRRPFLCCKCCYDHVISTSHKLVLSVNPYVCNAPGCDVTDVTDVTLQYLLGGMSYYCKSHK  
EPI\_ISL\_413571 -----  
EPI\_ISL\_413574 -----  
EPI\_ISL\_413579 -----  
EPI\_ISL\_413584 -----  
EPI\_ISL\_413587 -----  
EPI\_ISL\_424257 -----  
EPI\_ISL\_425565 -----  
EPI\_ISL\_425575 -----  
EPI\_ISL\_426822 -----  
EPI\_ISL\_426833 -----  
EPI\_ISL\_426885 -----  
EPI\_ISL\_426886 -----  
EPI\_ISL\_426889 -----  
EPI\_ISL\_426891 -----  
EPI\_ISL\_426892 -----  
EPI\_ISL\_426894 -----  
EPI\_ISL\_426896 -----  
EPI\_ISL\_426897 -----  
EPI\_ISL\_426899 -----

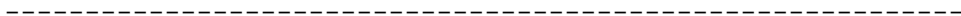

ORF1ab 5401 PPISFPLCANGQVFGLYKNTCVGSDNVTDFNAIATCDWTNAGDYILANTCTERLKLFAAE  
EPI\_ISL\_413571 -----  
EPI\_ISL\_413574 -----  
EPI\_ISL\_413579 -----  
EPI\_ISL\_413584 -----  
EPI\_ISL\_413587 -----  
EPI\_ISL\_424257 -----  
EPI\_ISL\_425565 -----  
EPI\_ISL\_425575 -----  
EPI\_ISL\_426822 -----  
EPI\_ISL\_426833 -----  
EPI\_ISL\_426885 -----  
EPI\_ISL\_426886 -----  
EPI\_ISL\_426889 -----  
EPI\_ISL\_426891 -----  
EPI\_ISL\_426892 -----  
EPI\_ISL\_426894 -----  
EPI\_ISL\_426896 -----  
EPI\_ISL\_426897 -----  
EPI\_ISL\_426899 -----  
EPI\_ISL\_426906 -----

ORF1ab 5461 TLKATEETFKLSYGIATVREVLSDRELHLSWEVGKPRPPLNRNYVFTGYRVTKNSKVQIG  
EPI\_ISL\_413571 -----  
EPI\_ISL\_413574 -----  
EPI\_ISL\_413579 -----  
EPI\_ISL\_413584 -----  
EPI\_ISL\_413587 -----  
EPI\_ISL\_424257 -----  
EPI\_ISL\_425565 -----  
EPI\_ISL\_425575 -----  
EPI\_ISL\_426822 -----  
EPI\_ISL\_426833 -----  
EPI\_ISL\_426885 -----  
EPI\_ISL\_426886 -----  
EPI\_ISL\_426889 -----  
EPI\_ISL\_426891 -----  
EPI\_ISL\_426892 -----  
EPI\_ISL\_426894 -----  
EPI\_ISL\_426896 -----  
EPI\_ISL\_426897 -----  
EPI\_ISL\_426899 -----  
EPI\_ISL\_426906 -----

ORF1ab 5521 EYTFEKGDYGDVAVYRGTTTTYKLNVDYFVLTSHVMPLSAPTLVLPQEHYVRITGLYPTL  
EPI\_ISL\_413571 -----  
EPI\_ISL\_413574 -----  
EPI\_ISL\_413579 -----  
EPI\_ISL\_413584 -----  
EPI\_ISL\_413587 -----  
EPI\_ISL\_424257 -----  
EPI\_ISL\_425565 -----  
EPI\_ISL\_425575 -----  
EPI\_ISL\_426822 -----  
EPI\_ISL\_426833 -----  
EPI\_ISL\_426885 -----  
EPI\_ISL\_426886 -----  
EPI\_ISL\_426889 -----  
EPI\_ISL\_426891 -----  
EPI\_ISL\_426892 -----  
EPI\_ISL\_426894 -----  
EPI\_ISL\_426896 -----  
EPI\_ISL\_426897 -----  
EPI\_ISL\_426899 -----



ORF1ab 5581 NISDEFSSNVANYQKVGMQKYSTLQGPPGTGKSHFAIGLALYYPSARIVYTACSHAAVDA  
EPI\_ISL\_413571 -----  
EPI\_ISL\_413574 -----  
EPI\_ISL\_413579 -----  
EPI\_ISL\_413584 -----  
EPI\_ISL\_413587 -----  
EPI\_ISL\_424257 -----  
EPI\_ISL\_425565 -----  
EPI\_ISL\_425575 -----  
EPI\_ISL\_426822 -----  
EPI\_ISL\_426833 -----  
EPI\_ISL\_426885 -----  
EPI\_ISL\_426886 -----  
EPI\_ISL\_426889 -----  
EPI\_ISL\_426891 -----  
EPI\_ISL\_426892 -----  
EPI\_ISL\_426894 -----  
EPI\_ISL\_426896 -----  
EPI\_ISL\_426897 -----  
EPI\_ISL\_426899 -----  
EPI\_ISL\_426906 -----

ORF1ab 5641 LCEKALKYLPIDKCSRIIPARARVECFDKFKVNSTLEQYVFCTVNALPETTADIVVFDEI  
EPI\_ISL\_413571 -----  
EPI\_ISL\_413574 -----  
EPI\_ISL\_413579 -----  
EPI\_ISL\_413584 -----  
EPI\_ISL\_413587 -----  
EPI\_ISL\_424257 -----  
EPI\_ISL\_425565 -----  
EPI\_ISL\_425575 -----  
EPI\_ISL\_426822 -----  
EPI\_ISL\_426833 -----  
EPI\_ISL\_426885 -----  
EPI\_ISL\_426886 -----  
EPI\_ISL\_426889 -----  
EPI\_ISL\_426891 -----  
EPI\_ISL\_426892 -----  
EPI\_ISL\_426894 -----  
EPI\_ISL\_426896 -----  
EPI\_ISL\_426897 -----  
EPI\_ISL\_426899 -----  
EPI\_ISL\_426906 -----

ORF1ab 5701 SMATNYDLSVVNARLRKHYVYIGDPAQLPAPRTLLTKGTLEPEYFNSVCRLMKTIGPDM  
EPI\_ISL\_413571 -----  
EPI\_ISL\_413574 -----  
EPI\_ISL\_413579 -----  
EPI\_ISL\_413584 -----  
EPI\_ISL\_413587 -----  
EPI\_ISL\_424257 -----  
EPI\_ISL\_425565 -----  
EPI\_ISL\_425575 -----  
EPI\_ISL\_426822 -----  
EPI\_ISL\_426833 -----  
EPI\_ISL\_426885 -----  
EPI\_ISL\_426886 -----  
EPI\_ISL\_426889 -----  
EPI\_ISL\_426891 -----  
EPI\_ISL\_426892 -----  
EPI\_ISL\_426894 -----  
EPI\_ISL\_426896 -----  
EPI\_ISL\_426897 -----  
EPI\_ISL\_426899 -----





ORF1ab 5761 FLGTCRRCPAEIVDTVSALVYDNKCLKAHKDKSAQCCKMFYKGVITHDVSSAINRPQIGVV  
EPI\_ISL\_413571 -----  
EPI\_ISL\_413574 -----  
EPI\_ISL\_413579 -----  
EPI\_ISL\_413584 -----  
EPI\_ISL\_413587 -----  
EPI\_ISL\_424257 -----  
EPI\_ISL\_425565 -----  
EPI\_ISL\_425575 -----  
EPI\_ISL\_426822 -----  
EPI\_ISL\_426833 -----  
EPI\_ISL\_426885 -----  
EPI\_ISL\_426886 -----  
EPI\_ISL\_426889 -----  
EPI\_ISL\_426891 -----  
EPI\_ISL\_426892 -----  
EPI\_ISL\_426894 -----  
EPI\_ISL\_426896 -----  
EPI\_ISL\_426897 -----  
EPI\_ISL\_426899 -----  
EPI\_ISL\_426906 -----

ORF1ab 5821 REFLTRNPAWRKAVFISPYN SQNAVASKILGLPTQTV DSSQGSEYDYVIFTQT TETAHSC  
EPI\_ISL\_413571 -----  
EPI\_ISL\_413574 -----  
EPI\_ISL\_413579 -----  
EPI\_ISL\_413584 -----  
EPI\_ISL\_413587 -----  
EPI\_ISL\_424257 -----  
EPI\_ISL\_425565 -----  
EPI\_ISL\_425575 -----  
EPI\_ISL\_426822 -----  
EPI\_ISL\_426833 -----  
EPI\_ISL\_426885 -----  
EPI\_ISL\_426886 -----  
EPI\_ISL\_426889 -----  
EPI\_ISL\_426891 -----  
EPI\_ISL\_426892 -----  
EPI\_ISL\_426894 -----  
EPI\_ISL\_426896 -----  
EPI\_ISL\_426897 -----  
EPI\_ISL\_426899 -----  
EPI\_ISL\_426906 -----

ORF1ab 5881 NVNRFNVAITRAKVGILCIMS DRRDLYDKLQFTSLEI PRRNVATLQAENVTGLFKDCSKVI  
EPI\_ISL\_413571 -----  
EPI\_ISL\_413574 -----  
EPI\_ISL\_413579 -----  
EPI\_ISL\_413584 -----  
EPI\_ISL\_413587 -----  
EPI\_ISL\_424257 -----  
EPI\_ISL\_425565 -----  
EPI\_ISL\_425575 -----  
EPI\_ISL\_426822 -----  
EPI\_ISL\_426833 -----  
EPI\_ISL\_426885 -----  
EPI\_ISL\_426886 -----  
EPI\_ISL\_426889 -----  
EPI\_ISL\_426891 -----  
EPI\_ISL\_426892 -----  
EPI\_ISL\_426894 -----  
EPI\_ISL\_426896 -----  
EPI\_ISL\_426897 -----  
EPI\_ISL\_426899 -----

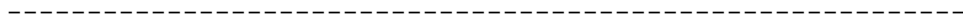

ORF1ab 5941 TGLHPTQAPTHLSVDTKFKTEGLCVDIPGIPKDMTYRRLISMMGFKMNYQVNGYPNMFIT  
EPI\_ISL\_413571 -----  
EPI\_ISL\_413574 -----  
EPI\_ISL\_413579 -----  
EPI\_ISL\_413584 -----  
EPI\_ISL\_413587 -----  
EPI\_ISL\_424257 -----  
EPI\_ISL\_425565 -----  
EPI\_ISL\_425575 -----  
EPI\_ISL\_426822 -----  
EPI\_ISL\_426833 -----  
EPI\_ISL\_426885 -----  
EPI\_ISL\_426886 -----  
EPI\_ISL\_426889 -----  
EPI\_ISL\_426891 -----  
EPI\_ISL\_426892 -----  
EPI\_ISL\_426894 -----  
EPI\_ISL\_426896 -----  
EPI\_ISL\_426897 -----  
EPI\_ISL\_426899 -----  
EPI\_ISL\_426906 -----

ORF1ab 6001 REEAIRHVRAWIGFDVEGCHATREAVGTNLPLQLGFSTGVNLVAVPTGYVDTPNNTDFSR  
EPI\_ISL\_413571 -----  
EPI\_ISL\_413574 -----  
EPI\_ISL\_413579 -----  
EPI\_ISL\_413584 -----  
EPI\_ISL\_413587 -----  
EPI\_ISL\_424257 -----  
EPI\_ISL\_425565 -----  
EPI\_ISL\_425575 -----  
EPI\_ISL\_426822 -----  
EPI\_ISL\_426833 -----  
EPI\_ISL\_426885 -----  
EPI\_ISL\_426886 -----  
EPI\_ISL\_426889 -----  
EPI\_ISL\_426891 -----  
EPI\_ISL\_426892 -----  
EPI\_ISL\_426894 -----  
EPI\_ISL\_426896 -----  
EPI\_ISL\_426897 -----  
EPI\_ISL\_426899 -----  
EPI\_ISL\_426906 -----

ORF1ab 6061 VSAKPPPGDQFKHLIPLMYKGLPWNVVRKIVQMLSDTLKNLSDRVVFVLWAHGFELTSM  
EPI\_ISL\_413571 -----  
EPI\_ISL\_413574 -----  
EPI\_ISL\_413579 -----  
EPI\_ISL\_413584 -----  
EPI\_ISL\_413587 -----  
EPI\_ISL\_424257 -----  
EPI\_ISL\_425565 -----  
EPI\_ISL\_425575 -----  
EPI\_ISL\_426822 -----  
EPI\_ISL\_426833 -----  
EPI\_ISL\_426885 -----  
EPI\_ISL\_426886 -----  
EPI\_ISL\_426889 -----  
EPI\_ISL\_426891 -----  
EPI\_ISL\_426892 -----  
EPI\_ISL\_426894 -----  
EPI\_ISL\_426896 -----  
EPI\_ISL\_426897 -----  
EPI\_ISL\_426899 -----



ORF1ab 6121 KYFVKIGPERTCCLCDRRATCFSTASDTYACWHHSIGFDYVYNPFMIDVQQWGF TGNLQS  
EPI\_ISL\_413571 -----  
EPI\_ISL\_413574 -----  
EPI\_ISL\_413579 -----  
EPI\_ISL\_413584 -----  
EPI\_ISL\_413587 -----  
EPI\_ISL\_424257 -----  
EPI\_ISL\_425565 -----  
EPI\_ISL\_425575 -----  
EPI\_ISL\_426822 -----  
EPI\_ISL\_426833 -----  
EPI\_ISL\_426885 -----  
EPI\_ISL\_426886 -----  
EPI\_ISL\_426889 -----  
EPI\_ISL\_426891 -----  
EPI\_ISL\_426892 -----  
EPI\_ISL\_426894 -----  
EPI\_ISL\_426896 -----  
EPI\_ISL\_426897 -----  
EPI\_ISL\_426899 -----  
EPI\_ISL\_426906 -----

ORF1ab 6181 NHDLYCQVHGNAHVASCDAIMTRCLAVHECFVKRVDWTIEYPIIGDELKINAACRKVQHM  
EPI\_ISL\_413571 -----  
EPI\_ISL\_413574 -----  
EPI\_ISL\_413579 -----  
EPI\_ISL\_413584 -----  
EPI\_ISL\_413587 -----  
EPI\_ISL\_424257 -----  
EPI\_ISL\_425565 -----  
EPI\_ISL\_425575 -----  
EPI\_ISL\_426822 -----  
EPI\_ISL\_426833 -----  
EPI\_ISL\_426885 -----  
EPI\_ISL\_426886 -----  
EPI\_ISL\_426889 -----  
EPI\_ISL\_426891 -----  
EPI\_ISL\_426892 -----  
EPI\_ISL\_426894 -----  
EPI\_ISL\_426896 -----  
EPI\_ISL\_426897 -----  
EPI\_ISL\_426899 -----  
EPI\_ISL\_426906 -----

ORF1ab 6241 VVKAALLADKFPVLHDIGNPKAIKCVPQADVEWKFYDAQPCSDKAYKIEELFYSYATHSD  
EPI\_ISL\_413571 -----  
EPI\_ISL\_413574 -----  
EPI\_ISL\_413579 -----  
EPI\_ISL\_413584 -----  
EPI\_ISL\_413587 -----  
EPI\_ISL\_424257 -----  
EPI\_ISL\_425565 -----  
EPI\_ISL\_425575 -----  
EPI\_ISL\_426822 -----  
EPI\_ISL\_426833 -----  
EPI\_ISL\_426885 -----  
EPI\_ISL\_426886 -----  
EPI\_ISL\_426889 -----  
EPI\_ISL\_426891 -----  
EPI\_ISL\_426892 -----  
EPI\_ISL\_426894 -----  
EPI\_ISL\_426896 -----  
EPI\_ISL\_426897 -----  
EPI\_ISL\_426899 -----



ORF1ab 6301 KFTDGVCLFWNCNVDRYPANSIVCRFDTRVLSNLNLPGCDGGSLYVNKHAFHTPAFDKSA  
EPI\_ISL\_413571 -----  
EPI\_ISL\_413574 -----  
EPI\_ISL\_413579 -----  
EPI\_ISL\_413584 -----  
EPI\_ISL\_413587 -----  
EPI\_ISL\_424257 -----  
EPI\_ISL\_425565 -----  
EPI\_ISL\_425575 -----  
EPI\_ISL\_426822 -----  
EPI\_ISL\_426833 -----  
EPI\_ISL\_426885 -----  
EPI\_ISL\_426886 -----  
EPI\_ISL\_426889 -----  
EPI\_ISL\_426891 -----  
EPI\_ISL\_426892 -----  
EPI\_ISL\_426894 -----  
EPI\_ISL\_426896 -----  
EPI\_ISL\_426897 -----  
EPI\_ISL\_426899 -----  
EPI\_ISL\_426906 -----

ORF1ab 6361 FVNLKQLPFFYYSDSPCESHGKQVVSDDIDYVPLKSATCITRCNLGGAVCRHHANEYRLYL  
EPI\_ISL\_413571 -----  
EPI\_ISL\_413574 -----  
EPI\_ISL\_413579 -----  
EPI\_ISL\_413584 -----  
EPI\_ISL\_413587 -----  
EPI\_ISL\_424257 -----  
EPI\_ISL\_425565 -----  
EPI\_ISL\_425575 -----  
EPI\_ISL\_426822 -----  
EPI\_ISL\_426833 -----  
EPI\_ISL\_426885 -----  
EPI\_ISL\_426886 -----  
EPI\_ISL\_426889 -----  
EPI\_ISL\_426891 -----  
EPI\_ISL\_426892 -----  
EPI\_ISL\_426894 -----  
EPI\_ISL\_426896 -----  
EPI\_ISL\_426897 -----  
EPI\_ISL\_426899 -----  
EPI\_ISL\_426906 -----

ORF1ab 6421 DAYNMMISAGFSLWVYKQFDTYNLWNTFTRLQSLNVAFNVVNKGHFDGQQGEVPSIIN  
EPI\_ISL\_413571 -----  
EPI\_ISL\_413574 -----  
EPI\_ISL\_413579 -----  
EPI\_ISL\_413584 -----  
EPI\_ISL\_413587 -----  
EPI\_ISL\_424257 -----  
EPI\_ISL\_425565 -----  
EPI\_ISL\_425575 -----  
EPI\_ISL\_426822 -----  
EPI\_ISL\_426833 -----  
EPI\_ISL\_426885 -----  
EPI\_ISL\_426886 -----  
EPI\_ISL\_426889 -----  
EPI\_ISL\_426891 -----  
EPI\_ISL\_426892 -----  
EPI\_ISL\_426894 -----  
EPI\_ISL\_426896 -----  
EPI\_ISL\_426897 -----  
EPI\_ISL\_426899 -----





ORF1ab 6481 NTVYTKVDGVDVELFENKTTLPVNVAFELWAKRNIKPVPEVKILNNLGVDIAANTVIWDY  
EPI\_ISL\_413571 -----  
EPI\_ISL\_413574 -----  
EPI\_ISL\_413579 -----  
EPI\_ISL\_413584 -----  
EPI\_ISL\_413587 -----  
EPI\_ISL\_424257 -----  
EPI\_ISL\_425565 -----  
EPI\_ISL\_425575 -----  
EPI\_ISL\_426822 -----  
EPI\_ISL\_426833 -----  
EPI\_ISL\_426885 -----  
EPI\_ISL\_426886 -----  
EPI\_ISL\_426889 -----  
EPI\_ISL\_426891 -----  
EPI\_ISL\_426892 -----  
EPI\_ISL\_426894 -----  
EPI\_ISL\_426896 -----  
EPI\_ISL\_426897 -----  
EPI\_ISL\_426899 -----  
EPI\_ISL\_426906 -----

ORF1ab 6541 KRDAHAHISTIGVCSMTDIAKKPTETICAPLTVFFDGRVDGQVDLFRNARNGVLITEGSV  
EPI\_ISL\_413571 -----  
EPI\_ISL\_413574 -----  
EPI\_ISL\_413579 -----  
EPI\_ISL\_413584 -----  
EPI\_ISL\_413587 -----  
EPI\_ISL\_424257 -----  
EPI\_ISL\_425565 -----  
EPI\_ISL\_425575 -----  
EPI\_ISL\_426822 -----  
EPI\_ISL\_426833 -----  
EPI\_ISL\_426885 -----  
EPI\_ISL\_426886 -----  
EPI\_ISL\_426889 -----  
EPI\_ISL\_426891 -----  
EPI\_ISL\_426892 -----  
EPI\_ISL\_426894 -----  
EPI\_ISL\_426896 -----  
EPI\_ISL\_426897 -----  
EPI\_ISL\_426899 -----  
EPI\_ISL\_426906 -----

ORF1ab 6601 KGLQPSVGPKQASLNGVTLIGEAVKTQFNYYKKVDGVVQQLPETYFTQSRNLQEFKPRSQ  
EPI\_ISL\_413571 -----  
EPI\_ISL\_413574 -----  
EPI\_ISL\_413579 -----  
EPI\_ISL\_413584 -----  
EPI\_ISL\_413587 -----  
EPI\_ISL\_424257 -----  
EPI\_ISL\_425565 -----  
EPI\_ISL\_425575 -----  
EPI\_ISL\_426822 -----  
EPI\_ISL\_426833 -----  
EPI\_ISL\_426885 -----  
EPI\_ISL\_426886 -----  
EPI\_ISL\_426889 -----  
EPI\_ISL\_426891 -----  
EPI\_ISL\_426892 -----  
EPI\_ISL\_426894 -----  
EPI\_ISL\_426896 -----  
EPI\_ISL\_426897 -----  
EPI\_ISL\_426899 -----



ORF1ab 6661 MEIDFLELAMDEFIERYKLEGYAFEHIVYGDFSHSQLGGLHLLIGLAKRFKESPFLEDF  
EPI\_ISL\_413571 -----  
EPI\_ISL\_413574 -----  
EPI\_ISL\_413579 -----  
EPI\_ISL\_413584 -----  
EPI\_ISL\_413587 -----  
EPI\_ISL\_424257 -----  
EPI\_ISL\_425565 -----  
EPI\_ISL\_425575 -----  
EPI\_ISL\_426822 -----  
EPI\_ISL\_426833 -----  
EPI\_ISL\_426885 -----  
EPI\_ISL\_426886 -----  
EPI\_ISL\_426889 -----  
EPI\_ISL\_426891 -----  
EPI\_ISL\_426892 -----  
EPI\_ISL\_426894 -----  
EPI\_ISL\_426896 -----  
EPI\_ISL\_426897 -----  
EPI\_ISL\_426899 -----  
EPI\_ISL\_426906 -----

ORF1ab 6721 IPMDSTVKNYFITDAQTGSSKCVCSVIDLLLDFFVEI IKSQDLSVVSKVVKVTIDYTEIS  
EPI\_ISL\_413571 -----  
EPI\_ISL\_413574 -----  
EPI\_ISL\_413579 -----  
EPI\_ISL\_413584 -----  
EPI\_ISL\_413587 -----  
EPI\_ISL\_424257 -----  
EPI\_ISL\_425565 -----  
EPI\_ISL\_425575 -----  
EPI\_ISL\_426822 -----  
EPI\_ISL\_426833 -----  
EPI\_ISL\_426885 -----  
EPI\_ISL\_426886 -----  
EPI\_ISL\_426889 -----  
EPI\_ISL\_426891 -----  
EPI\_ISL\_426892 -----  
EPI\_ISL\_426894 -----  
EPI\_ISL\_426896 -----  
EPI\_ISL\_426897 -----  
EPI\_ISL\_426899 -----  
EPI\_ISL\_426906 -----

ORF1ab 6781 FMLWCKDGHVETFYPKLQSSQAWQPGVAMPNLYKMQRMLLEKCDLQNYGDSATLPKGIMM  
EPI\_ISL\_413571 -----  
EPI\_ISL\_413574 -----  
EPI\_ISL\_413579 -----  
EPI\_ISL\_413584 -----  
EPI\_ISL\_413587 -----  
EPI\_ISL\_424257 -----  
EPI\_ISL\_425565 -----  
EPI\_ISL\_425575 -----  
EPI\_ISL\_426822 -----  
EPI\_ISL\_426833 -----  
EPI\_ISL\_426885 -----  
EPI\_ISL\_426886 -----  
EPI\_ISL\_426889 -----  
EPI\_ISL\_426891 -----  
EPI\_ISL\_426892 -----  
EPI\_ISL\_426894 -----  
EPI\_ISL\_426896 -----  
EPI\_ISL\_426897 -----  
EPI\_ISL\_426899 -----



ORF1ab 6841 NVAKYTQLCQYLNTLTLAVPYNMRVIHFGAGSDKGVAPGTAVLRQWLPTGTLVDSDLND  
EPI\_ISL\_413571 -----  
EPI\_ISL\_413574 -----  
EPI\_ISL\_413579 -----  
EPI\_ISL\_413584 -----  
EPI\_ISL\_413587 -----  
EPI\_ISL\_424257 -----  
EPI\_ISL\_425565 -----  
EPI\_ISL\_425575 -----  
EPI\_ISL\_426822 -----  
EPI\_ISL\_426833 -----  
EPI\_ISL\_426885 -----  
EPI\_ISL\_426886 -----  
EPI\_ISL\_426889 -----  
EPI\_ISL\_426891 -----  
EPI\_ISL\_426892 -----  
EPI\_ISL\_426894 -----  
EPI\_ISL\_426896 -----  
EPI\_ISL\_426897 -----  
EPI\_ISL\_426899 -----  
EPI\_ISL\_426906 -----

ORF1ab 6901 FVSDADSTLIGDCATVHTANKWDLIISDMYDPKTKNVTKENDSKEGFFTYICGFIQQKLA  
EPI\_ISL\_413571 -----  
EPI\_ISL\_413574 -----  
EPI\_ISL\_413579 -----  
EPI\_ISL\_413584 -----  
EPI\_ISL\_413587 -----  
EPI\_ISL\_424257 -----  
EPI\_ISL\_425565 -----  
EPI\_ISL\_425575 -----  
EPI\_ISL\_426822 -----  
EPI\_ISL\_426833 -----  
EPI\_ISL\_426885 -----  
EPI\_ISL\_426886 -----  
EPI\_ISL\_426889 -----  
EPI\_ISL\_426891 -----  
EPI\_ISL\_426892 -----  
EPI\_ISL\_426894 -----  
EPI\_ISL\_426896 -----  
EPI\_ISL\_426897 -----  
EPI\_ISL\_426899 -----  
EPI\_ISL\_426906 -----

ORF1ab 6961 LGGSSVAIKITEHSWNADLYKLMGHFAWWTAFVTNVNASSEAFILGICNYLGKPREQIDGY  
EPI\_ISL\_413571 -----  
EPI\_ISL\_413574 -----  
EPI\_ISL\_413579 -----  
EPI\_ISL\_413584 -----  
EPI\_ISL\_413587 -----  
EPI\_ISL\_424257 -----  
EPI\_ISL\_425565 -----  
EPI\_ISL\_425575 -----  
EPI\_ISL\_426822 -----  
EPI\_ISL\_426833 -----  
EPI\_ISL\_426885 -----  
EPI\_ISL\_426886 -----  
EPI\_ISL\_426889 -----  
EPI\_ISL\_426891 -----  
EPI\_ISL\_426892 -----  
EPI\_ISL\_426894 -----  
EPI\_ISL\_426896 -----  
EPI\_ISL\_426897 -----  
EPI\_ISL\_426899 -----



ORF1ab 7021 VMHANYIFWRNTNPIQLSSYSLFDMSEKFLKLRGTAVMSLKEGQINDMILSLLSKGRLII  
EPI\_ISL\_413571 -----  
EPI\_ISL\_413574 -----  
EPI\_ISL\_413579 -----  
EPI\_ISL\_413584 -----  
EPI\_ISL\_413587 -----  
EPI\_ISL\_424257 -----  
EPI\_ISL\_425565 -----  
EPI\_ISL\_425575 -----  
EPI\_ISL\_426822 -----  
EPI\_ISL\_426833 -----  
EPI\_ISL\_426885 -----  
EPI\_ISL\_426886 -----  
EPI\_ISL\_426889 -----  
EPI\_ISL\_426891 -----  
EPI\_ISL\_426892 -----  
EPI\_ISL\_426894 -----  
EPI\_ISL\_426896 -----  
EPI\_ISL\_426897 -----  
EPI\_ISL\_426899 -----  
EPI\_ISL\_426906 -----

ORF1ab 7081 RENNRRVVISSDVLVNN  
EPI\_ISL\_413571 -----  
EPI\_ISL\_413574 -----  
EPI\_ISL\_413579 -----  
EPI\_ISL\_413584 -----  
EPI\_ISL\_413587 -----  
EPI\_ISL\_424257 -----  
EPI\_ISL\_425565 -----  
EPI\_ISL\_425575 -----  
EPI\_ISL\_426822 -----  
EPI\_ISL\_426833 -----  
EPI\_ISL\_426885 -----  
EPI\_ISL\_426886 -----  
EPI\_ISL\_426889 -----  
EPI\_ISL\_426891 -----  
EPI\_ISL\_426892 -----  
EPI\_ISL\_426894 -----  
EPI\_ISL\_426896 -----  
EPI\_ISL\_426897 -----  
EPI\_ISL\_426899 -----  
EPI\_ISL\_426906 -----

# Clade I

ORF1ab 1 MESLVPGFNEKTHVQLSLPVLQVRDVLVRGFGDSVEEVLSERQHLKDGTCGLVEVEKGV  
EPI\_ISL\_411066 1 -----  
EPI\_ISL\_413522 1 -----  
EPI\_ISL\_413558 1 -----  
EPI\_ISL\_413559 1 -----  
EPI\_ISL\_413561 1 -----  
EPI\_ISL\_413692 1 -----  
EPI\_ISL\_413693 1 -----  
EPI\_ISL\_413694 1 -----  
EPI\_ISL\_414692 1 -----  
EPI\_ISL\_424359 1 -----  
EPI\_ISL\_424396 1 -----  
EPI\_ISL\_424399 1 -----  
EPI\_ISL\_425530 1 -----  
EPI\_ISL\_425561 1 -----  
EPI\_ISL\_425614 1 -----  
EPI\_ISL\_425635 1 -----  
EPI\_ISL\_426848 1 -----  
EPI\_ISL\_426850 1 -----  
EPI\_ISL\_426955 1 -----  
EPI\_ISL\_426963 1 -----

ORF1ab 61 LPQLEQPYVFIKRSDARTAPHGHVMVELVAELEGIQYGRSGETLGVLPVHVGEIPVAYRK  
EPI\_ISL\_411066 1 -----  
EPI\_ISL\_413522 1 -----  
EPI\_ISL\_413558 1 -----  
EPI\_ISL\_413559 1 -----  
EPI\_ISL\_413561 1 -----  
EPI\_ISL\_413692 1 -----  
EPI\_ISL\_413693 1 -----  
EPI\_ISL\_413694 1 -----  
EPI\_ISL\_414692 1 -----  
EPI\_ISL\_424359 1 -----  
EPI\_ISL\_424396 1 -----  
EPI\_ISL\_424399 1 -----  
EPI\_ISL\_425530 1 -----  
EPI\_ISL\_425561 1 -----  
EPI\_ISL\_425614 1 -----  
EPI\_ISL\_425635 1 -----  
EPI\_ISL\_426848 1 -----  
EPI\_ISL\_426850 1 -----  
EPI\_ISL\_426955 1 -----  
EPI\_ISL\_426963 1 -----

ORF1ab 121 VLLRKNGNKGAGGHSYGADLKSFDLGDDELGTDPYEDFQENWNTKHSSGVTRELMRELNGG  
EPI\_ISL\_411066 1 -----  
EPI\_ISL\_413522 1 -----  
EPI\_ISL\_413558 1 -----  
EPI\_ISL\_413559 1 -----  
EPI\_ISL\_413561 1 -----  
EPI\_ISL\_413692 1 -----  
EPI\_ISL\_413693 1 -----  
EPI\_ISL\_413694 1 -----  
EPI\_ISL\_414692 1 -----  
EPI\_ISL\_424359 1 -----  
EPI\_ISL\_424396 1 -----  
EPI\_ISL\_424399 1 -----  
EPI\_ISL\_425530 1 -----  
EPI\_ISL\_425561 1 -----  
EPI\_ISL\_425614 1 -----



|                |   |       |
|----------------|---|-------|
| EPI_ISL_425635 | 1 | ----- |
| EPI_ISL_426848 | 1 | ----- |
| EPI_ISL_426850 | 1 | ----- |
| EPI_ISL_426955 | 1 | ----- |
| EPI_ISL_426963 | 1 | ----- |

ORF1ab 181 AYTRYVDNNFCGPDGYPLECIKDLLARAGKASCTLSEQLDFIDTKRGVYCCREHEHEIAW  
EPI\_ISL\_411066 1 -----  
EPI\_ISL\_413522 1 -----  
EPI\_ISL\_413558 1 -----  
EPI\_ISL\_413559 1 -----  
EPI\_ISL\_413561 1 -----  
EPI\_ISL\_413692 1 -----  
EPI\_ISL\_413693 1 -----  
EPI\_ISL\_413694 1 -----  
EPI\_ISL\_414692 1 -----  
EPI\_ISL\_424359 1 -----  
EPI\_ISL\_424396 1 -----  
EPI\_ISL\_424399 1 -----  
EPI\_ISL\_425530 1 -----  
EPI\_ISL\_425561 1 -----  
EPI\_ISL\_425614 1 -----  
EPI\_ISL\_425635 1 -----  
EPI\_ISL\_426848 1 -----  
EPI\_ISL\_426850 1 -----  
EPI\_ISL\_426955 1 -----  
EPI\_ISL\_426963 1 -----

ORF1ab 241 YTERSEKSYELQTPFEIKLAKKFDTFNGECPNFVFPPLNSIIKTIQPRVEKKKLDGFMGRI  
EPI\_ISL\_411066 1 -----  
EPI\_ISL\_413522 1 -----  
EPI\_ISL\_413558 1 -----  
EPI\_ISL\_413559 1 -----  
EPI\_ISL\_413561 1 -----  
EPI\_ISL\_413692 1 -----  
EPI\_ISL\_413693 1 -----  
EPI\_ISL\_413694 1 -----  
EPI\_ISL\_414692 1 -----  
EPI\_ISL\_424359 1 -----  
EPI\_ISL\_424396 1 -----  
EPI\_ISL\_424399 1 -----  
EPI\_ISL\_425530 1 -----  
EPI\_ISL\_425561 1 -----  
EPI\_ISL\_425614 1 -----  
EPI\_ISL\_425635 1 -----  
EPI\_ISL\_426848 1 -----  
EPI\_ISL\_426850 1 -----  
EPI\_ISL\_426955 1 -----  
EPI\_ISL\_426963 1 -----

ORF1ab 301 RSVYPVASPNECNQMCLSTLMKCDHCGETSWQTGDFVKATCEFCGTENLTKEGATTCGYL  
EPI\_ISL\_411066 1 -----  
EPI\_ISL\_413522 1 -----  
EPI\_ISL\_413558 1 -----  
EPI\_ISL\_413559 1 -----  
EPI\_ISL\_413561 1 -----  
EPI\_ISL\_413692 1 -----  
EPI\_ISL\_413693 1 -----  
EPI\_ISL\_413694 1 -----  
EPI\_ISL\_414692 1 -----  
EPI\_ISL\_424359 1 -----  
EPI\_ISL\_424396 1 -----  
EPI\_ISL\_424399 1 -----  
EPI\_ISL\_425530 1 -----  
EPI\_ISL\_425561 1 -----  
EPI\_ISL\_425614 1 -----  
EPI\_ISL\_425635 1 -----  
EPI\_ISL\_426848 1 -----  
EPI\_ISL\_426850 1 -----  
EPI\_ISL\_426955 1 -----



ORF1ab 361 PQNAVVKIYCPACHNSEVGPESHSLAEYHNESGLKTIILRKGGRRTIAFGGCVFSYVGCHNKC  
EPI\_ISL\_411066 1 -----  
EPI\_ISL\_413522 1 -----  
EPI\_ISL\_413558 1 -----  
EPI\_ISL\_413559 1 -----  
EPI\_ISL\_413561 1 -----  
EPI\_ISL\_413692 1 -----  
EPI\_ISL\_413693 1 -----  
EPI\_ISL\_413694 1 -----  
EPI\_ISL\_414692 1 -----  
EPI\_ISL\_424359 1 -----  
EPI\_ISL\_424396 1 -----  
EPI\_ISL\_424399 1 -----  
EPI\_ISL\_425530 1 -----  
EPI\_ISL\_425561 1 -----  
EPI\_ISL\_425614 1 -----  
EPI\_ISL\_425635 1 -----  
EPI\_ISL\_426848 1 -----  
EPI\_ISL\_426850 1 -----  
EPI\_ISL\_426955 1 -----  
EPI\_ISL\_426963 1 -----

ORF1ab 421 AYWVPRASANIGCNHTGVVGESEGLNDNLLEILQKEKVNINIVGDFKLNEEIAIILASF  
EPI\_ISL\_411066 1 -----  
EPI\_ISL\_413522 1 -----  
EPI\_ISL\_413558 1 -----  
EPI\_ISL\_413559 1 -----  
EPI\_ISL\_413561 1 -----  
EPI\_ISL\_413692 1 -----  
EPI\_ISL\_413693 1 -----  
EPI\_ISL\_413694 1 -----  
EPI\_ISL\_414692 1 -----  
EPI\_ISL\_424359 1 -----  
EPI\_ISL\_424396 1 -----  
EPI\_ISL\_424399 1 -----  
EPI\_ISL\_425530 1 -----  
EPI\_ISL\_425561 1 -----  
EPI\_ISL\_425614 1 -----  
EPI\_ISL\_425635 1 -----  
EPI\_ISL\_426848 1 -----  
EPI\_ISL\_426850 1 -----  
EPI\_ISL\_426955 1 -----  
EPI\_ISL\_426963 1 -----

ORF1ab 481 SASTSAFVETVKGLDYKAFKQIVESCGNFKVTKGKAKKGAWNIGEQKSILSPLYAFASEA  
EPI\_ISL\_411066 1 -----  
EPI\_ISL\_413522 1 -----  
EPI\_ISL\_413558 1 -----  
EPI\_ISL\_413559 1 -----  
EPI\_ISL\_413561 1 -----  
EPI\_ISL\_413692 1 -----  
EPI\_ISL\_413693 1 -----  
EPI\_ISL\_413694 1 -----  
EPI\_ISL\_414692 1 -----  
EPI\_ISL\_424359 1 -----  
EPI\_ISL\_424396 1 -----  
EPI\_ISL\_424399 1 -----  
EPI\_ISL\_425530 1 -----  
EPI\_ISL\_425561 1 -----  
EPI\_ISL\_425614 1 -----  
EPI\_ISL\_425635 1 -----  
EPI\_ISL\_426848 1 -----  
EPI\_ISL\_426850 1 -----  
EPI\_ISL\_426955 1 -----



ORF1ab 541 ARVVRSIFSRTLETAQNSVRVLQKAAITILDGISQYSLRLIDAMMFTSDLATNNLVVMAY  
EPI\_ISL\_411066 1 -----  
EPI\_ISL\_413522 1 -----  
EPI\_ISL\_413558 1 -----  
EPI\_ISL\_413559 1 -----  
EPI\_ISL\_413561 1 -----  
EPI\_ISL\_413692 1 -----  
EPI\_ISL\_413693 1 -----  
EPI\_ISL\_413694 1 -----  
EPI\_ISL\_414692 1 -----  
EPI\_ISL\_424359 1 -----  
EPI\_ISL\_424396 1 -----  
EPI\_ISL\_424399 1 -----  
EPI\_ISL\_425530 1 -----  
EPI\_ISL\_425561 1 -----  
EPI\_ISL\_425614 1 -----  
EPI\_ISL\_425635 1 -----  
EPI\_ISL\_426848 1 -----  
EPI\_ISL\_426850 1 -----  
EPI\_ISL\_426955 1 -----  
EPI\_ISL\_426963 1 -----

ORF1ab 601 ITGGVVQLTSQWLTNIFGTVYEKLPVLDWLEEKFKEGVEFLRDGWEIVKFI STCACEIV  
EPI\_ISL\_411066 1 -----  
EPI\_ISL\_413522 1 -----  
EPI\_ISL\_413558 1 -----  
EPI\_ISL\_413559 1 -----  
EPI\_ISL\_413561 1 -----  
EPI\_ISL\_413692 1 -----  
EPI\_ISL\_413693 1 -----  
EPI\_ISL\_413694 1 -----  
EPI\_ISL\_414692 1 -----  
EPI\_ISL\_424359 1 -----  
EPI\_ISL\_424396 1 -----  
EPI\_ISL\_424399 1 -----  
EPI\_ISL\_425530 1 -----  
EPI\_ISL\_425561 1 -----  
EPI\_ISL\_425614 1 -----  
EPI\_ISL\_425635 1 -----  
EPI\_ISL\_426848 1 -----  
EPI\_ISL\_426850 1 -----  
EPI\_ISL\_426955 1 -----  
EPI\_ISL\_426963 1 -----

ORF1ab 661 GGQIVTCAKEIKESVQTFKLVNKFLALCADSIIIGGAKLKALNLGETFVTHSKGLYRKC  
EPI\_ISL\_411066 1 -----  
EPI\_ISL\_413522 1 -----  
EPI\_ISL\_413558 1 -----  
EPI\_ISL\_413559 1 -----  
EPI\_ISL\_413561 1 -----  
EPI\_ISL\_413692 1 -----  
EPI\_ISL\_413693 1 -----  
EPI\_ISL\_413694 1 -----  
EPI\_ISL\_414692 1 -----  
EPI\_ISL\_424359 1 -----  
EPI\_ISL\_424396 1 -----  
EPI\_ISL\_424399 1 -----  
EPI\_ISL\_425530 1 -----  
EPI\_ISL\_425561 1 -----  
EPI\_ISL\_425614 1 -----  
EPI\_ISL\_425635 1 -----  
EPI\_ISL\_426848 1 -----  
EPI\_ISL\_426850 1 -----  
EPI\_ISL\_426955 1 -----



ORF1ab 721 VKSREETGLMLPLKAPKEIIFLEGETLPTEVLTEEVVLKTGDLQPLEQPTSEAVEAPLVG  
EPI\_ISL\_411066 1 -----  
EPI\_ISL\_413522 1 -----  
EPI\_ISL\_413558 1 -----  
EPI\_ISL\_413559 1 -----  
EPI\_ISL\_413561 1 -----  
EPI\_ISL\_413692 1 -----  
EPI\_ISL\_413693 1 -----  
EPI\_ISL\_413694 1 -----  
EPI\_ISL\_414692 1 -----  
EPI\_ISL\_424359 1 -----  
EPI\_ISL\_424396 1 -----  
EPI\_ISL\_424399 1 -----  
EPI\_ISL\_425530 1 -----  
EPI\_ISL\_425561 1 -----  
EPI\_ISL\_425614 1 -----  
EPI\_ISL\_425635 1 -----  
EPI\_ISL\_426848 1 -----  
EPI\_ISL\_426850 1 -----  
EPI\_ISL\_426955 1 -----  
EPI\_ISL\_426963 1 -----

ORF1ab 781 TPVCINGLMLEIKDTEKYCALAPNMMVTNNTFTLKGGA**APTKVTFGDDTVIEVQGYKSVN**  
EPI\_ISL\_411066 1 -----**APTKVTFGDDTVIEVQGYKSVN**  
EPI\_ISL\_413522 1 -----**APTKVTFGDDTVIEVQGYKSVN**  
EPI\_ISL\_413558 1 -----**APTKVTFGDDTVIEVQGYKSVN**  
EPI\_ISL\_413559 1 -----**APTKVTFGDDTVIEVQGYKSVN**  
EPI\_ISL\_413561 1 -----**APTKVTFGDDTVIEVQGYKSVN**  
EPI\_ISL\_413692 1 -----**APTKVTFGDDTVIEVQGYKSVN**  
EPI\_ISL\_413693 1 -----**APTKVTFGDDTVIEVQGYKSVN**  
EPI\_ISL\_413694 1 -----**APTKVTFGDDTVIEVQGYKSVN**  
EPI\_ISL\_414692 1 -----**APTKVTFGDDTVIEVQGYKSVN**  
EPI\_ISL\_424359 1 -----**APTKVTFGDDTVIEVQGYKSVN**  
EPI\_ISL\_424396 1 -----**APTKVTFGDDTVIEVQGYKSVN**  
EPI\_ISL\_424399 1 -----**APTKVTFGDDTVIEVQGYKSVN**  
EPI\_ISL\_425530 1 -----**APTKVTFGDDTVIEVQGYKSVN**  
EPI\_ISL\_425561 1 -----**APTKVTFGDDTVIEVQGYKSVN**  
EPI\_ISL\_425614 1 -----**APTKVTFGDDTVIEVQGYKSVN**  
EPI\_ISL\_425635 1 -----**APTKVTFGDDTVIEVQGYKSVN**  
EPI\_ISL\_426848 1 -----**APTKVTFGDDTVIEVQGYKSVN**  
EPI\_ISL\_426850 1 -----**APTKVTFGDDTVIEVQGYKSVN**  
EPI\_ISL\_426955 1 -----**APTKVTFGDDTVIEVQGYKSVN**  
EPI\_ISL\_426963 1 -----**APTKVTFGDDTVIEVQGYKSVN**

ORF1ab 841 **ITFELDERIDKVLNEKCSAYTVELGTEVNEFACVVADAVIKTLQPVSELLTPLGIDLDEW**  
EPI\_ISL\_411066 23 **ITFELDERIDKVLNEKCSAYTVELGTEVNEFACVVADAVIKTLQPVSELLTPLGIDLDEW**  
EPI\_ISL\_413522 23 **ITFELDERIDKVLNEKCSAYTVELGTEVNEFACVVADAVIKTLQPVSELLTPLGIDLDEW**  
EPI\_ISL\_413558 23 **ITFELDERIDKVLNEKCSAYTVELGTEVNEFACVVADAVIKTLQPVSELLTPLGIDLDEW**  
EPI\_ISL\_413559 23 **ITFELDERIDKVLNEKCSAYTVELGTEVNEFACVVADAVIKTLQPVSELLTPLGIDLDEW**  
EPI\_ISL\_413561 23 **ITFELDERIDKVLNEKCSAYTVELGTEVNEFACVV****T****DAVIKTLQPVSELLTPLGIDLDEW**  
EPI\_ISL\_413692 23 **ITFELDERIDKVLNEKCSAYTVELGTEVNEFACVVADAVIKTLQPVSELLTPLGIDLDEW**  
EPI\_ISL\_413693 23 **ITFELDERIDKVLNEKCSAYTVELGTEVNEFACVVADAVIKTLQPVSELLTPLGIDLDEW**  
EPI\_ISL\_413694 23 **ITFELDERIDKVLNEKCSAYTVELGTEVNEFACVVADAVIKTLQPVSELLTPLGIDLDEW**  
EPI\_ISL\_414692 23 **ITFELDERIDKVLNEKCSAYTVELGTEVNEFACVVADAVIKTLQPVSELLTPLGIDLDEW**  
EPI\_ISL\_424359 23 **ITFELDERIDKVLNEKCSAYTVELGTEVNEFACVVADAVIKTLQPVSELLTPLGIDLDEW**  
EPI\_ISL\_424396 23 **ITFELDERIDKVLNEKCSAYTVELGTEVNEFACVVADAVIKTLQPVSELLTPLGIDLDEW**  
EPI\_ISL\_424399 23 **ITFELDERIDKVLNEKCSAYTVELGTEVNEFACVVADAVIKTLQPVSELLTPLGIDLDEW**  
EPI\_ISL\_425530 23 **ITFELDERIDKVLNEKCSAYTVELGTEVNEFACVV****T****DAVIKTLQPVSELLTPLGIDLDEW**  
EPI\_ISL\_425561 23 **ITFELDERIDKVLNEKCSAYTVELGTEVNEFACVV****T****DAVIKTLQPVSELLTPLGIDLDEW**  
EPI\_ISL\_425614 23 **ITFELDERIDKVLNEKCSAYTVELGTEVNEFACVV****T****DAVIKTLQPVSELLTPLGIDLDEW**  
EPI\_ISL\_425635 23 **ITFELDERIDKVLNEKCSAYTVELGTEVNEFACVV****T****DAVIKTLQPVSELLTPLGIDLDEW**  
EPI\_ISL\_426848 23 **ITFELDERIDKVLNEKCSAYTVELGTEVNEFACVV****T****DAVIKTLQPVSELLTPLGIDLDEW**  
EPI\_ISL\_426850 23 **ITFELDERIDKVLNEKCSAYTVELGTEVNEFACVV****T****DAVIKTLQPVSELLTPLGIDLDEW**  
EPI\_ISL\_426955 23 **ITFELDERIDKVLNEKCSAYTVELGTEVNEFACVV****T****DAVIKTLQPVSELLTPLGIDLDEW**







EPI\_ISL\_426963 203 QTIEVNSFSGYLKLTDNVYIKNADIVEEAKKVKPTVVVNAANVYLKHGGGVAGALNKATN

|                |      |                        |
|----------------|------|------------------------|
| ORF1ab         | 1081 | NAMQVESDDYIATNGPLKVGGS |
| EPI_ISL_411066 | 263  | NAMQVESDDYIATNGPLKVGGS |
| EPI_ISL_413522 | 263  | NAMQVESDDYIATNGPLKVGGS |
| EPI_ISL_413558 | 263  | NAMQVESDDYIATNGPLKVGGS |
| EPI_ISL_413559 | 263  | NAMQVESDDYIATNGPLKVGGS |
| EPI_ISL_413561 | 263  | NAMQVESDDYIATNGPLKVGGS |
| EPI_ISL_413692 | 263  | NAMQVESDDYIATNGPLKVGGS |
| EPI_ISL_413693 | 263  | NAMQVESDDYIATNGPLKVGGS |
| EPI_ISL_413694 | 263  | NAMQVESDDYIATNGPLKVGGS |
| EPI_ISL_414692 | 263  | NAMQVESDDYIATNGPLKVGGS |
| EPI_ISL_424359 | 263  | NAMQVESDDYIATNGPLKVGGS |
| EPI_ISL_424396 | 263  | NAMQVESDDYIATNGPLKVGGS |
| EPI_ISL_424399 | 263  | NAMQVESDDYIATNGPLKVGGS |
| EPI_ISL_425530 | 263  | NAMQVESDDYIATNGPLKVGGS |
| EPI_ISL_425561 | 263  | NAMQVESDDYIATNGPLKVGGS |
| EPI_ISL_425614 | 263  | NAMQVESDDYIATNGPLKVGGS |
| EPI_ISL_425635 | 263  | NAMQVESDDYIATNGPLKVGGS |
| EPI_ISL_426848 | 263  | NAMQVESDDYIATNGPLKVGGS |
| EPI_ISL_426850 | 263  | NAMQVESDDYIATNGPLKVGGS |
| EPI_ISL_426955 | 263  | NAMQVESDDYIATNGPLKVGGS |
| EPI_ISL_426963 | 263  | NAMQVESDDYIATNGPLKVGGS |

|                |      |                           |
|----------------|------|---------------------------|
| ORF1ab         | 1141 | HEVLLAPLLSAGIFGADPIHSLRVC |
| EPI_ISL_411066 | 323  | HEVLLAPLLSAGIFGADPIHSLRVC |
| EPI_ISL_413522 | 323  | HEVLLAPLLSAGIFGADPIHSLRVC |
| EPI_ISL_413558 | 323  | HEVLLAPLLSAGIFGADPIHSLRVC |
| EPI_ISL_413559 | 323  | HEVLLAPLLSAGIFGADPIHSLRVC |
| EPI_ISL_413561 | 323  | HEVLLAPLLSAGIFGADPIHSLRVC |
| EPI_ISL_413692 | 323  | HEVLLAPLLSAGIFGADPIHSLRVC |
| EPI_ISL_413693 | 323  | HEVLLAPLLSAGIFGADPIHSLRVC |
| EPI_ISL_413694 | 323  | HEVLLAPLLSAGIFGADPIHSLRVC |
| EPI_ISL_414692 | 323  | HEVLLAPLLSAGIFGADPIHSLRVC |
| EPI_ISL_424359 | 323  | HEVLLAPLLSAGIFGADPIHSLRVC |
| EPI_ISL_424396 | 323  | HEVLLAPLLSAGIFGADPIHSLRVC |
| EPI_ISL_424399 | 323  | HEVLLAPLLSAGIFGADPIHSLRVC |
| EPI_ISL_425530 | 323  | HEVLLAPLLSAGIFGADPIHSLRVC |
| EPI_ISL_425561 | 323  | HEVLLAPLLSAGIFGADPIHSLRVC |
| EPI_ISL_425614 | 323  | HEVLLAPLLSAGIFGADPIHSLRVC |
| EPI_ISL_425635 | 323  | HEVLLAPLLSAGIFGADPIHSLRVC |
| EPI_ISL_426848 | 323  | HEVLLAPLLSAGIFGADPIHSLRVC |
| EPI_ISL_426850 | 323  | HEVLLAPLLSAGIFGADPIHSLRVC |
| EPI_ISL_426955 | 323  | HEVLLAPLLSAGIFGADPIHSLRVC |
| EPI_ISL_426963 | 323  | HEVLLAPLLSAGIFGADPIHSLRVC |

|                |      |                           |
|----------------|------|---------------------------|
| ORF1ab         | 1201 | QKIAEIPKEEVKPFITESKPSVEQR |
| EPI_ISL_411066 | 383  | QKIAEIPKEEVKPFITESKPSVEQR |
| EPI_ISL_413522 | 383  | QKIAEIPKEEVKPFITESKPSVEQR |
| EPI_ISL_413558 | 383  | QKIAEIPKEEVKPFITESKPSVEQR |
| EPI_ISL_413559 | 383  | QKIAEIPKEEVKPFITESKPSVEQR |
| EPI_ISL_413561 | 383  | QKIAEIPKEEVKPFITESKPSVEQR |
| EPI_ISL_413692 | 383  | QKIAEIPKEEVKPFITESKPSVEQR |
| EPI_ISL_413693 | 383  | QKIAEIPKEEVKPFITESKPSVEQR |
| EPI_ISL_413694 | 383  | QKIAEIPKEEVKPFITESKPSVEQR |
| EPI_ISL_414692 | 383  | QKIAEIPKEEVKPFITESKPSVEQR |
| EPI_ISL_424359 | 383  | QKIAEIPKEEVKPFITESKPSVEQR |
| EPI_ISL_424396 | 383  | QKIAEIPKEEVKPFITESKPSVEQR |
| EPI_ISL_424399 | 383  | QKIAEIPKEEVKPFITESKPSVEQR |
| EPI_ISL_425530 | 383  | QKIAEIPKEEVKPFITESKPSVEQR |
| EPI_ISL_425561 | 383  | QKIAEIPKEEVKPFITESKPSVEQR |
| EPI_ISL_425614 | 383  | QKIAEIPKEEVKPFITESKPSVEQR |
| EPI_ISL_425635 | 383  | QKIAEIPKEEVKPFITESKPSVEQR |
| EPI_ISL_426848 | 383  | QKIAEIPKEEVKPFITESKPSVEQR |
| EPI_ISL_426850 | 383  | QKIAEIPKEEVKPFITESKPSVEQR |
| EPI_ISL_426955 | 383  | QKIAEIPKEEVKPFITESKPSVEQR |

EPI\_ISL\_426963 383 QKIAEIPKEEVKPFITESKPSVEQRKQDDKKIKACVEEVTTTLEETKFLTENLLLYIDIN



EPI\_ISL\_426963 563 HAEETRKLMPVCVETKAIVSTIQRKYKGIKIQEGVVDYGARFYFYTSKTTVASLINTLND





EPI\_ISL\_426963 743 SLREVRTIKVFTTVDNINLHTQVVDMSMTYGQQFGPTYLDGADVTKIKPHNSHEGKTFYV



EPI\_ISL\_426963 923 **LDSCRVLNVVCKTCGQQQTTLKGVEAVMYMGTLSEYQFKKGVQIPCTCGKQATKYLQQ**



EPI\_ISL\_426963 1103 PNASFDNFKFVCDNIKFADDLNQLTGYKKPASRELKVTFFPDLNGDVVAIDYKHYTPSK



EPI\_ISL\_426963 1283 **DNSSLTIKKPNELSRVLGLKTLATHGLAAVNSVPWDTIANYAKPFLNKVVSTTTNIVTRC**

|                |      |                                                |
|----------------|------|------------------------------------------------|
| ORF1ab         | 2161 | LNRVCTNYMPYFFFTLLLQLCTFTRSTNSRIKASMPPTIAKNTVKS |
| EPI_ISL_411066 | 1343 | LNRVCTNYMPYFFFTLLLQLCTFTRSTNSRIKASMPPTIAKNTVKS |
| EPI_ISL_413522 | 1343 | LNRVCTNYMPYFFFTLXLXLXXFTRSTNSRIKASMPPTIAKNTVKS |
| EPI_ISL_413558 | 1343 | LNRVCTNYMPYFFFTLLLQLCTFTRSTNSRIKASMPPTIAKNTVKS |
| EPI_ISL_413559 | 1343 | LNRVCTNYMPYFFFTLLLQLCTFTRSTNSRIKASMPPTIAKNTVKS |
| EPI_ISL_413561 | 1343 | LNRVCTNYMPYFFFTLLLQLCTFTRSTNSRIKASMPPTIAKNTVKS |
| EPI_ISL_413692 | 1343 | LNRVCTNYMPYFFFTLLLQLCTFTRSTNSRIKASMPPTIAKNTVKS |
| EPI_ISL_413693 | 1343 | LNRVCTNYMPYFFFTLLLQLCTFTRSTNSRIKASMPPTIAKNTVKS |
| EPI_ISL_413694 | 1343 | LNRVCTNYMPYFFFTLLLQLCTFTRSTNSRIKASMPPTIAKNTVKS |
| EPI_ISL_414692 | 1343 | LNRVCTNYMPYFFFTLLLQLCTFTRSTNSRIKASMPPTIAKNTVKS |
| EPI_ISL_424359 | 1343 | LNRVCTNYMPYFFFTLLLQLCTFTRSTNSRIKASMPPTIAKNTVKS |
| EPI_ISL_424396 | 1343 | LNRVCTNYMPYFFFTLLLQLCTFTRSTNSRIKASMPPTIAKNTVKS |
| EPI_ISL_424399 | 1343 | LNRVCTNYMPYFFFTLLLQLCTFTRSTNSRIKASMPPTIAKNTVKS |
| EPI_ISL_425530 | 1343 | LNRVCTNYMPYFFFTLLLQLCTFTRSTNSRIKASMPPTIAKNTVKS |
| EPI_ISL_425561 | 1343 | LNRVCTNYMPYFFFTLLLQLCTFTRSTNSRIKASMPPTIAKNTVKS |
| EPI_ISL_425614 | 1343 | LNRVCTNYMPYFFFTLLLQLCTFTRSTNSRIKASMPPTIAKNTVKS |
| EPI_ISL_425635 | 1343 | LNRVCTNYMPYFFFTLLLQLCTFTRSTNSRIKASMPPTIAKNTVKS |
| EPI_ISL_426848 | 1343 | LNRVCTNYMPYFFFTLLLQLCTFTRSTNSRIKASMPPTIAKNTVKS |
| EPI_ISL_426850 | 1343 | LNRVCTNYMPYFFFTLLLQLCTFTRSTNSRIKASMPPTIAKNTVKS |
| EPI_ISL_426955 | 1343 | LNRVCTNYMPYFFFTLLLQLCTFTRSTNSRIKASMPPTIAKNTVKS |
| EPI_ISL_426963 | 1343 | LNRVCTNYMPYFFFTLLLQLCTFTRSTNSRIKASMPPTIAKNTVKS |

|                |      |                                                       |
|----------------|------|-------------------------------------------------------|
| ORF1ab         | 2221 | PNFSKLINIIWFLLLSVCLGSLIYSTAALGVLMNSNLGMPYCYTGYREGYLN  |
| EPI_ISL_411066 | 1403 | PNFSKLXXXXXXFLLXSVCLGSLIYSTAALGVLMNSNLGMPYCYTGYREGYLN |
| EPI_ISL_413522 | 1403 | PNFSKLINIIWFLLLSVCLGSLIYSTAALGVLMNSNLGMPYCYTGYREGYLN  |
| EPI_ISL_413558 | 1403 | PNFSKLINIIWFLLLSVCLGSLIYSTAALGVLMNSNLGMPYCYTGYREGYLN  |
| EPI_ISL_413559 | 1403 | PNFSKLINIIWFLLLSVCLGSLIYSTAALGVLMNSNLGMPYCYTGYREGYLN  |
| EPI_ISL_413561 | 1403 | PNFSKLINIIWFLLLSVCLGSLIYSTAALGVLMNSNLGMPYCYTGYREGYLN  |
| EPI_ISL_413692 | 1403 | PNFSKLINIIWFLLLSVCLGSLIYSTAALGVLMNSNLGMPYCYTGYREGYLN  |
| EPI_ISL_413693 | 1403 | PNFSKLINIIWFLLLSVCLGSLIYSTAALGVLMNSNLGMPYCYTGYREGYLN  |
| EPI_ISL_413694 | 1403 | PNFSKLINIIWFLLLSVCLGSLIYSTAALGVLMNSNLGMPYCYTGYREGYLN  |
| EPI_ISL_414692 | 1403 | PNFSKLINIIWFLLLSVCLGSLIYSTAALGVLMNSNLGMPYCYTGYREGYLN  |
| EPI_ISL_424359 | 1403 | PNFSKLINIIWFLLLSVCLGSLIYSTAALGVLMNSNLGMPYCYTGYREGYLN  |
| EPI_ISL_424396 | 1403 | PNFSKLINIIWFLLLSVCLGSLIYSTAALGVLMNSNLGMPYCYTGYREGYLN  |
| EPI_ISL_424399 | 1403 | PNFSKLINIIWFLLLSVCLGSLIYSTAALGVLMNSNLGMPYCYTGYREGYLN  |
| EPI_ISL_425530 | 1403 | PNFSKLINIIWFLLLSVCLGSLIYSTAALGVLMNSNLGMPYCYTGYREGYLN  |
| EPI_ISL_425561 | 1403 | PNFSKLINIIWFLLLSVCLGSLIYSTAALGVLMNSNLGMPYCYTGYREGYLN  |
| EPI_ISL_425614 | 1403 | PNFSKLINIIWFLLLSVCLGSLIYSTAALGVLMNSNLGMPYCYTGYREGYLN  |
| EPI_ISL_425635 | 1403 | PNFSKLINIIWFLLLSVCLGSLIYSTAALGVLMNSNLGMPYCYTGYREGYLN  |
| EPI_ISL_426848 | 1403 | PNFSKLINIIWFLLLSVCLGSLIYSTAALGVLMNSNLGMPYCYTGYREGYLN  |
| EPI_ISL_426850 | 1403 | PNFSKLINIIWFLLLSVCLGSLIYSTAALGVLMNSNLGMPYCYTGYREGYLN  |
| EPI_ISL_426955 | 1403 | PNFSKLINIIWFLLLSVCLGSLIYSTAALGVLMNSNLGMPYCYTGYREGYLN  |
| EPI_ISL_426963 | 1403 | PNFSKLINIIWFLLLSVCLGSLIYSTAALGVLMNSNLGMPYCYTGYREGYLN  |

|                |      |                                                             |
|----------------|------|-------------------------------------------------------------|
| ORF1ab         | 2281 | YCTGSIPCSVCLSGDLSLDTPSLETIQITISSFKWDLTAFGLVAEWFLAYILFTRFFYV |
| EPI_ISL_411066 | 1463 | YCTGSIPCSVCLSGDLSLDTPSLETIQITISSFKWDLTAFGLVAEWFLAYILFTRFFYV |
| EPI_ISL_413522 | 1463 | YCTGSIPCSVCLSGDLSLDTPSLETIQITISSFKWDLTAFGLVAEWFLAYILFTRFFYV |
| EPI_ISL_413558 | 1463 | YCTGSIPCSVCLSGDLSLDTPSLETIQITISSFKWDLTAFGLVAEWFLAYILFTRFFYV |
| EPI_ISL_413559 | 1463 | YCTGSIPCSVCLSGDLSLDTPSLETIQITISSFKWDLTAFGLVAEWFLAYILFTRFFYV |
| EPI_ISL_413561 | 1463 | YCTGSIPCSVCLSGDLSLDTPSLETIQITISSFKWDLTAFGLVAEWFLAYILFTRFFYV |
| EPI_ISL_413692 | 1463 | YCTGSIPCSVCLSGDLSLDTPSLETIQITISSFKWDLTAFGLVAEWFLAYILFTRFFYV |
| EPI_ISL_413693 | 1463 | YCTGSIPCSVCLSGDLSLDTPSLETIQITISSFKWDLTAFGLVAEWFLAYILFTRFFYV |
| EPI_ISL_413694 | 1463 | YCTGSIPCSVCLSGDLSLDTPSLETIQITISSFKWDLTAFGLVAEWFLAYILFTRFFYV |
| EPI_ISL_414692 | 1463 | YCTGSIPCSVCLSGDLSLDTPSLETIQITISSFKWDLTAFGLVAEWFLAYILFTRFFYV |
| EPI_ISL_424359 | 1463 | YCTGSIPCSVCLSGDLSLDTPSLETIQITISSFKWDLTAFGLVAEWFLAYILFTRFFYV |
| EPI_ISL_424396 | 1463 | YCTGSIPCSVCLSGDLSLDTPSLETIQITISSFKWDLTAFGLVAEWFLAYILFTRFFYV |
| EPI_ISL_424399 | 1463 | YCTGSIPCSVCLSGDLSLDTPSLETIQITISSFKWDLTAFGLVAEWFLAYILFTRFFYV |
| EPI_ISL_425530 | 1463 | YCTGSIPCSVCLSGDLSLDTPSLETIQITISSFKWDLTAFGLVAEWFLAYILFTRFFYV |
| EPI_ISL_425561 | 1463 | YCTGSIPCSVCLSGDLSLDTPSLETIQITISSFKWDLTAFGLVAEWFLAYILFTRFFYV |
| EPI_ISL_425614 | 1463 | YCTGSIPCSVCLSGDLSLDTPSLETIQITISSFKWDLTAFGLVAEWFLAYILFTRFFYV |
| EPI_ISL_425635 | 1463 | YCTGSIPCSVCLSGDLSLDTPSLETIQITISSFKWDLTAFGLVAEWFLAYILFTRFFYV |
| EPI_ISL_426848 | 1463 | YCTGSIPCSVCLSGDLSLDTPSLETIQITISSFKWDLTAFGLVAEWFLAYILFTRFFYV |
| EPI_ISL_426850 | 1463 | YCTGSIPCSVCLSGDLSLDTPSLETIQITISSFKWDLTAFGLVAEWFLAYILFTRFFYV |
| EPI_ISL_426955 | 1463 | YCTGSIPCSVCLSGDLSLDTPSLETIQITISSFKWDLTAFGLVAEWFLAYILFTRFFYV |



EPI\_ISL\_426963 1463 YCTGSIPCSVCLSGLDSDLTYPSELETIQITISSFKWDLTAFGLVAEWFLAYILFTRFFYV



EPI\_ISL\_426963 1643 **GSTFISDEVARDLSLQFKRPINPTDQSSYIVDSVTVKNGSIHLYFDKAGQKTYERHLSH**



EPI\_ISL\_426963 1823 FVDSVETKDVVECLKLSHQSDIEVTGDSCNNYMLTYNKVENMTPRDLGACIDCSARHIN

|                |      |                                                              |
|----------------|------|--------------------------------------------------------------|
| ORF1ab         | 2701 | AQVAKSHNIALIWNVKDFMSLSEQLRKQIRSAAKKNNLPFKLTCATTRQVVNVVTTKIAL |
| EPI_ISL_411066 | 1883 | AQVAKSHNIALIWNVKDFMSLSEQLRKQIRSAAKKNNLPFKLTCATTRQVVNVVTTKIAL |
| EPI_ISL_413522 | 1883 | AQVAKSHNIALIWNVKDFMSLSEQLRKQIRSAAKKNNLPFKLTCATTRQVVNVVTTKIAL |
| EPI_ISL_413558 | 1883 | AQVAKSHNIALIWNVKDFMSLSEQLRKQIRSAAKKNNLPFKLTCATTRQVVNVVTTKIAL |
| EPI_ISL_413559 | 1883 | AQVAKSHNIALIWNVKDFMSLSEQLRKQIRSAAKKNNLPFKLTCATTRQVVNVVTTKIAL |
| EPI_ISL_413561 | 1883 | AQVAKSHNIALIWNVKDFMSLSEQLRKQIRSAAKKNNLPFKLTCATTRQVVNVVTTKIAL |
| EPI_ISL_413692 | 1883 | AQVAKSHNIALIWNVKDFMSLSEQLRKQIRSAAKKNNLPFKLTCATTRQVVNVVTTKIAL |
| EPI_ISL_413693 | 1883 | AQVAKSHNIALIWNVKDFMSLSEQLRKQIRSAAKKNNLPFKLTCATTRQVVNVVTTKIAL |
| EPI_ISL_413694 | 1883 | AQVAKSHNIALIWNVKDFMSLSEQLRKQIRSAAKKNNLPFKLTCATTRQVVNVVTTKIAL |
| EPI_ISL_414692 | 1883 | AQVAKSHNIALIWNVKDFMSLSEQLRKQIRSAAKKNNLPFKLTCATTRQVVNVVTTKIAL |
| EPI_ISL_424359 | 1883 | AQVAKSHNIALIWNVKDFMSLSEQLRKQIRSAAKKNNLPFKLTCATTRQVVNVVTTKIAL |
| EPI_ISL_424396 | 1883 | AQVAKSHNIALIWNVKDFMSLSEQLRKQIRSAAKKNNLPFKLTCATTRQVVNVVTTKIAL |
| EPI_ISL_424399 | 1883 | AQVAKSHNIALIWNVKDFMSLSEQLRKQIRSAAKKNNLPFKLTCATTRQVVNVVTTKIAL |
| EPI_ISL_425530 | 1883 | AQVAKSHNIALIWNVKDFMSLSEQLRKQIRSAAKKNNLPFKLTCATTRQVVNVVTTKIAL |
| EPI_ISL_425561 | 1883 | AQVAKSHNIALIWNVKDFMSLSEQLRKQIRSAAKKNNLPFKLTCATTRQVVNVVTTKIAL |
| EPI_ISL_425614 | 1883 | AQVAKSHNIALIWNVKDFMSLSEQLRKQIRSAAKKNNLPFKLTCATTRQVVNVVTTKIAL |
| EPI_ISL_425635 | 1883 | AQVAKSHNIALIWNVKDFMSLSEQLRKQIRSAAKKNNLPFKLTCATTRQVVNVVTTKIAL |
| EPI_ISL_426848 | 1883 | AQVAKSHNIALIWNVKDFMSLSEQLRKQIRSAAKKNNLPFKLTCATTRQVVNVVTTKIAL |
| EPI_ISL_426850 | 1883 | AQVAKSHNIALIWNVKDFMSLSEQLRKQIRSAAKKNNLPFKLTCATTRQVVNVVTTKIAL |
| EPI_ISL_426955 | 1883 | AQVAKSHNIALIWNVKDFMSLSEQLRKQIRSAAKKNNLPFKLTCATTRQVVNVVTTKIAL |
| EPI_ISL_426963 | 1883 | AQVAKSHNIALIWNVKDFMSLSEQLRKQIRSAAKKNNLPFKLTCATTRQVVNVVTTKIAL |

|                |      |                                                              |
|----------------|------|--------------------------------------------------------------|
| ORF1ab         | 2761 | KGGKIVNNWLKQLIKVTLVFLFVAAIFYLITPVHVMKHTDFSSSEIIGYKAIDGGVTRDI |
| EPI_ISL_411066 | 1943 | KGG-----                                                     |
| EPI_ISL_413522 | 1943 | KGG-----                                                     |
| EPI_ISL_413558 | 1943 | KGG-----                                                     |
| EPI_ISL_413559 | 1943 | KGG-----                                                     |
| EPI_ISL_413561 | 1943 | KGG-----                                                     |
| EPI_ISL_413692 | 1943 | KGG-----                                                     |
| EPI_ISL_413693 | 1943 | KGG-----                                                     |
| EPI_ISL_413694 | 1943 | KGG-----                                                     |
| EPI_ISL_414692 | 1943 | KGG-----                                                     |
| EPI_ISL_424359 | 1943 | KGG-----                                                     |
| EPI_ISL_424396 | 1943 | KGG-----                                                     |
| EPI_ISL_424399 | 1943 | KGG-----                                                     |
| EPI_ISL_425530 | 1943 | KGG-----                                                     |
| EPI_ISL_425561 | 1943 | KGG-----                                                     |
| EPI_ISL_425614 | 1943 | KGG-----                                                     |
| EPI_ISL_425635 | 1943 | KGG-----                                                     |
| EPI_ISL_426848 | 1943 | KGG-----                                                     |
| EPI_ISL_426850 | 1943 | KGG-----                                                     |
| EPI_ISL_426955 | 1943 | KGG-----                                                     |
| EPI_ISL_426963 | 1943 | KGG-----                                                     |

|                |      |                                                               |
|----------------|------|---------------------------------------------------------------|
| ORF1ab         | 2821 | ASTDTCFANKHADFDTWFSQRGGSYTNDKACPLIAAVITREVG FVVPGLPGTILRTTNGD |
| EPI_ISL_411066 |      | -----                                                         |
| EPI_ISL_413522 |      | -----                                                         |
| EPI_ISL_413558 |      | -----                                                         |
| EPI_ISL_413559 |      | -----                                                         |
| EPI_ISL_413561 |      | -----                                                         |
| EPI_ISL_413692 |      | -----                                                         |
| EPI_ISL_413693 |      | -----                                                         |
| EPI_ISL_413694 |      | -----                                                         |
| EPI_ISL_414692 |      | -----                                                         |
| EPI_ISL_424359 |      | -----                                                         |
| EPI_ISL_424396 |      | -----                                                         |
| EPI_ISL_424399 |      | -----                                                         |
| EPI_ISL_425530 |      | -----                                                         |
| EPI_ISL_425561 |      | -----                                                         |
| EPI_ISL_425614 |      | -----                                                         |
| EPI_ISL_425635 |      | -----                                                         |
| EPI_ISL_426848 |      | -----                                                         |
| EPI_ISL_426850 |      | -----                                                         |
| EPI_ISL_426955 |      | -----                                                         |

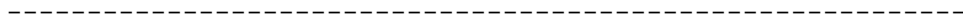

ORF1ab 2881 FLHFLPRVFSAVGNICYTPSKLIEYTD FATSACVLAAECTIFKDASGKPVPCYD TNVLE  
EPI\_ISL\_411066 -----  
EPI\_ISL\_413522 -----  
EPI\_ISL\_413558 -----  
EPI\_ISL\_413559 -----  
EPI\_ISL\_413561 -----  
EPI\_ISL\_413692 -----  
EPI\_ISL\_413693 -----  
EPI\_ISL\_413694 -----  
EPI\_ISL\_414692 -----  
EPI\_ISL\_424359 -----  
EPI\_ISL\_424396 -----  
EPI\_ISL\_424399 -----  
EPI\_ISL\_425530 -----  
EPI\_ISL\_425561 -----  
EPI\_ISL\_425614 -----  
EPI\_ISL\_425635 -----  
EPI\_ISL\_426848 -----  
EPI\_ISL\_426850 -----  
EPI\_ISL\_426955 -----  
EPI\_ISL\_426963 -----

ORF1ab 2941 GSVAYESLRPDTRYV LMDGSI IQFPNTYLEG SVRVVTTFDSEYCRHGT CERSEAGVCVST  
EPI\_ISL\_411066 -----  
EPI\_ISL\_413522 -----  
EPI\_ISL\_413558 -----  
EPI\_ISL\_413559 -----  
EPI\_ISL\_413561 -----  
EPI\_ISL\_413692 -----  
EPI\_ISL\_413693 -----  
EPI\_ISL\_413694 -----  
EPI\_ISL\_414692 -----  
EPI\_ISL\_424359 -----  
EPI\_ISL\_424396 -----  
EPI\_ISL\_424399 -----  
EPI\_ISL\_425530 -----  
EPI\_ISL\_425561 -----  
EPI\_ISL\_425614 -----  
EPI\_ISL\_425635 -----  
EPI\_ISL\_426848 -----  
EPI\_ISL\_426850 -----  
EPI\_ISL\_426955 -----  
EPI\_ISL\_426963 -----

ORF1ab 3001 SGRWVLNNDYYRSLPGVFCGVDAVNLLTNMFTPLIQPIGALDISASIVAGGIVAI VVTCL  
EPI\_ISL\_411066 -----  
EPI\_ISL\_413522 -----  
EPI\_ISL\_413558 -----  
EPI\_ISL\_413559 -----  
EPI\_ISL\_413561 -----  
EPI\_ISL\_413692 -----  
EPI\_ISL\_413693 -----  
EPI\_ISL\_413694 -----  
EPI\_ISL\_414692 -----  
EPI\_ISL\_424359 -----  
EPI\_ISL\_424396 -----  
EPI\_ISL\_424399 -----  
EPI\_ISL\_425530 -----  
EPI\_ISL\_425561 -----  
EPI\_ISL\_425614 -----  
EPI\_ISL\_425635 -----  
EPI\_ISL\_426848 -----  
EPI\_ISL\_426850 -----  
EPI\_ISL\_426955 -----





ORF1ab 3061 AYYFMRFRRAFGEYSHVVAFNNTLLFLMSFTVLCLTPVYSFLPGVYSVIYLYLTFYLTNDV  
EPI\_ISL\_411066 -----  
EPI\_ISL\_413522 -----  
EPI\_ISL\_413558 -----  
EPI\_ISL\_413559 -----  
EPI\_ISL\_413561 -----  
EPI\_ISL\_413692 -----  
EPI\_ISL\_413693 -----  
EPI\_ISL\_413694 -----  
EPI\_ISL\_414692 -----  
EPI\_ISL\_424359 -----  
EPI\_ISL\_424396 -----  
EPI\_ISL\_424399 -----  
EPI\_ISL\_425530 -----  
EPI\_ISL\_425561 -----  
EPI\_ISL\_425614 -----  
EPI\_ISL\_425635 -----  
EPI\_ISL\_426848 -----  
EPI\_ISL\_426850 -----  
EPI\_ISL\_426955 -----  
EPI\_ISL\_426963 -----

ORF1ab 3121 SFLAHIQWMVMFTPLVPFWITIAIYIICISTKHFWFFSNYLKRRVVFNGVSFSTFEEAAL  
EPI\_ISL\_411066 -----  
EPI\_ISL\_413522 -----  
EPI\_ISL\_413558 -----  
EPI\_ISL\_413559 -----  
EPI\_ISL\_413561 -----  
EPI\_ISL\_413692 -----  
EPI\_ISL\_413693 -----  
EPI\_ISL\_413694 -----  
EPI\_ISL\_414692 -----  
EPI\_ISL\_424359 -----  
EPI\_ISL\_424396 -----  
EPI\_ISL\_424399 -----  
EPI\_ISL\_425530 -----  
EPI\_ISL\_425561 -----  
EPI\_ISL\_425614 -----  
EPI\_ISL\_425635 -----  
EPI\_ISL\_426848 -----  
EPI\_ISL\_426850 -----  
EPI\_ISL\_426955 -----  
EPI\_ISL\_426963 -----

ORF1ab 3181 CTFLLNKEMYLKLRSDVLLPLTQYNRYLALYNKYKYFSGAMDTTSYREAACCHLAKALND  
EPI\_ISL\_411066 -----  
EPI\_ISL\_413522 -----  
EPI\_ISL\_413558 -----  
EPI\_ISL\_413559 -----  
EPI\_ISL\_413561 -----  
EPI\_ISL\_413692 -----  
EPI\_ISL\_413693 -----  
EPI\_ISL\_413694 -----  
EPI\_ISL\_414692 -----  
EPI\_ISL\_424359 -----  
EPI\_ISL\_424396 -----  
EPI\_ISL\_424399 -----  
EPI\_ISL\_425530 -----  
EPI\_ISL\_425561 -----  
EPI\_ISL\_425614 -----  
EPI\_ISL\_425635 -----  
EPI\_ISL\_426848 -----  
EPI\_ISL\_426850 -----  
EPI\_ISL\_426955 -----



ORF1ab 3241 FSNSGSDVLYQPPQTSITSAVLQSGFRKMAFPSGKVEGCMVQVTCGTTTTLNLGLWLDVVY  
EPI\_ISL\_411066 -----  
EPI\_ISL\_413522 -----  
EPI\_ISL\_413558 -----  
EPI\_ISL\_413559 -----  
EPI\_ISL\_413561 -----  
EPI\_ISL\_413692 -----  
EPI\_ISL\_413693 -----  
EPI\_ISL\_413694 -----  
EPI\_ISL\_414692 -----  
EPI\_ISL\_424359 -----  
EPI\_ISL\_424396 -----  
EPI\_ISL\_424399 -----  
EPI\_ISL\_425530 -----  
EPI\_ISL\_425561 -----  
EPI\_ISL\_425614 -----  
EPI\_ISL\_425635 -----  
EPI\_ISL\_426848 -----  
EPI\_ISL\_426850 -----  
EPI\_ISL\_426955 -----  
EPI\_ISL\_426963 -----

ORF1ab 3301 CPRHVICTSEDMLNPNYEDLLIRKSNHNFLVQAGNVQLRVIGHSMQNCVCLKKVDTANPK  
EPI\_ISL\_411066 -----  
EPI\_ISL\_413522 -----  
EPI\_ISL\_413558 -----  
EPI\_ISL\_413559 -----  
EPI\_ISL\_413561 -----  
EPI\_ISL\_413692 -----  
EPI\_ISL\_413693 -----  
EPI\_ISL\_413694 -----  
EPI\_ISL\_414692 -----  
EPI\_ISL\_424359 -----  
EPI\_ISL\_424396 -----  
EPI\_ISL\_424399 -----  
EPI\_ISL\_425530 -----  
EPI\_ISL\_425561 -----  
EPI\_ISL\_425614 -----  
EPI\_ISL\_425635 -----  
EPI\_ISL\_426848 -----  
EPI\_ISL\_426850 -----  
EPI\_ISL\_426955 -----  
EPI\_ISL\_426963 -----

ORF1ab 3361 TPKYKFVRIQPGQTFVSLACYNGSPSGVYQCAMRPNFTIKGSFLNGSCGSVGFNIDYDCV  
EPI\_ISL\_411066 -----  
EPI\_ISL\_413522 -----  
EPI\_ISL\_413558 -----  
EPI\_ISL\_413559 -----  
EPI\_ISL\_413561 -----  
EPI\_ISL\_413692 -----  
EPI\_ISL\_413693 -----  
EPI\_ISL\_413694 -----  
EPI\_ISL\_414692 -----  
EPI\_ISL\_424359 -----  
EPI\_ISL\_424396 -----  
EPI\_ISL\_424399 -----  
EPI\_ISL\_425530 -----  
EPI\_ISL\_425561 -----  
EPI\_ISL\_425614 -----  
EPI\_ISL\_425635 -----  
EPI\_ISL\_426848 -----  
EPI\_ISL\_426850 -----  
EPI\_ISL\_426955 -----



ORF1ab 3421 SFCYMHMELPTGVHAGTDLEGNFYGPVDRQTAQAAGTDTTITVNVLAWLYAAVINGDR  
EPI\_ISL\_411066 -----  
EPI\_ISL\_413522 -----  
EPI\_ISL\_413558 -----  
EPI\_ISL\_413559 -----  
EPI\_ISL\_413561 -----  
EPI\_ISL\_413692 -----  
EPI\_ISL\_413693 -----  
EPI\_ISL\_413694 -----  
EPI\_ISL\_414692 -----  
EPI\_ISL\_424359 -----  
EPI\_ISL\_424396 -----  
EPI\_ISL\_424399 -----  
EPI\_ISL\_425530 -----  
EPI\_ISL\_425561 -----  
EPI\_ISL\_425614 -----  
EPI\_ISL\_425635 -----  
EPI\_ISL\_426848 -----  
EPI\_ISL\_426850 -----  
EPI\_ISL\_426955 -----  
EPI\_ISL\_426963 -----

ORF1ab 3481 WFLNRF'TTTLNDFNLVAMKYNYEPLTQDHVDILGPLSAQTGIAVLDMCASLKELLQNGMN  
EPI\_ISL\_411066 -----  
EPI\_ISL\_413522 -----  
EPI\_ISL\_413558 -----  
EPI\_ISL\_413559 -----  
EPI\_ISL\_413561 -----  
EPI\_ISL\_413692 -----  
EPI\_ISL\_413693 -----  
EPI\_ISL\_413694 -----  
EPI\_ISL\_414692 -----  
EPI\_ISL\_424359 -----  
EPI\_ISL\_424396 -----  
EPI\_ISL\_424399 -----  
EPI\_ISL\_425530 -----  
EPI\_ISL\_425561 -----  
EPI\_ISL\_425614 -----  
EPI\_ISL\_425635 -----  
EPI\_ISL\_426848 -----  
EPI\_ISL\_426850 -----  
EPI\_ISL\_426955 -----  
EPI\_ISL\_426963 -----

ORF1ab 3541 GRTILGSALLEDEFTPFVVRQCSGVTFQSAVKRTIKGTHHWLLLLTILTSLLVLVQSTQW  
EPI\_ISL\_411066 -----  
EPI\_ISL\_413522 -----  
EPI\_ISL\_413558 -----  
EPI\_ISL\_413559 -----  
EPI\_ISL\_413561 -----  
EPI\_ISL\_413692 -----  
EPI\_ISL\_413693 -----  
EPI\_ISL\_413694 -----  
EPI\_ISL\_414692 -----  
EPI\_ISL\_424359 -----  
EPI\_ISL\_424396 -----  
EPI\_ISL\_424399 -----  
EPI\_ISL\_425530 -----  
EPI\_ISL\_425561 -----  
EPI\_ISL\_425614 -----  
EPI\_ISL\_425635 -----  
EPI\_ISL\_426848 -----  
EPI\_ISL\_426850 -----  
EPI\_ISL\_426955 -----



ORF1ab 3601 SLFFFLYENAFLPFAMGIIAMSAFAMMFVKHKHAFLLCLFLLPSLATVAYFNMVYMPASWV  
EPI\_ISL\_411066 -----  
EPI\_ISL\_413522 -----  
EPI\_ISL\_413558 -----  
EPI\_ISL\_413559 -----  
EPI\_ISL\_413561 -----  
EPI\_ISL\_413692 -----  
EPI\_ISL\_413693 -----  
EPI\_ISL\_413694 -----  
EPI\_ISL\_414692 -----  
EPI\_ISL\_424359 -----  
EPI\_ISL\_424396 -----  
EPI\_ISL\_424399 -----  
EPI\_ISL\_425530 -----  
EPI\_ISL\_425561 -----  
EPI\_ISL\_425614 -----  
EPI\_ISL\_425635 -----  
EPI\_ISL\_426848 -----  
EPI\_ISL\_426850 -----  
EPI\_ISL\_426955 -----  
EPI\_ISL\_426963 -----

ORF1ab 3661 MRIMTWLDMVDTSLSGFKLKDCVMYASAVVLLILMTARTVYDDGARRVWTLMNVLTLVYK  
EPI\_ISL\_411066 -----  
EPI\_ISL\_413522 -----  
EPI\_ISL\_413558 -----  
EPI\_ISL\_413559 -----  
EPI\_ISL\_413561 -----  
EPI\_ISL\_413692 -----  
EPI\_ISL\_413693 -----  
EPI\_ISL\_413694 -----  
EPI\_ISL\_414692 -----  
EPI\_ISL\_424359 -----  
EPI\_ISL\_424396 -----  
EPI\_ISL\_424399 -----  
EPI\_ISL\_425530 -----  
EPI\_ISL\_425561 -----  
EPI\_ISL\_425614 -----  
EPI\_ISL\_425635 -----  
EPI\_ISL\_426848 -----  
EPI\_ISL\_426850 -----  
EPI\_ISL\_426955 -----  
EPI\_ISL\_426963 -----

ORF1ab 3721 VYIGNALDQAISMWALIIISVTSNYSQVVTVMFLARGIVFMCVEYCPPIFFITGNTLQCIM  
EPI\_ISL\_411066 -----  
EPI\_ISL\_413522 -----  
EPI\_ISL\_413558 -----  
EPI\_ISL\_413559 -----  
EPI\_ISL\_413561 -----  
EPI\_ISL\_413692 -----  
EPI\_ISL\_413693 -----  
EPI\_ISL\_413694 -----  
EPI\_ISL\_414692 -----  
EPI\_ISL\_424359 -----  
EPI\_ISL\_424396 -----  
EPI\_ISL\_424399 -----  
EPI\_ISL\_425530 -----  
EPI\_ISL\_425561 -----  
EPI\_ISL\_425614 -----  
EPI\_ISL\_425635 -----  
EPI\_ISL\_426848 -----  
EPI\_ISL\_426850 -----  
EPI\_ISL\_426955 -----





ORF1ab 3781 LVYCFLGYFCTCYFGLFCLLNRYFRLTLGVYDYLSTQEFRYMNSQGLLPPKNSIDAFKL  
EPI\_ISL\_411066 -----  
EPI\_ISL\_413522 -----  
EPI\_ISL\_413558 -----  
EPI\_ISL\_413559 -----  
EPI\_ISL\_413561 -----  
EPI\_ISL\_413692 -----  
EPI\_ISL\_413693 -----  
EPI\_ISL\_413694 -----  
EPI\_ISL\_414692 -----  
EPI\_ISL\_424359 -----  
EPI\_ISL\_424396 -----  
EPI\_ISL\_424399 -----  
EPI\_ISL\_425530 -----  
EPI\_ISL\_425561 -----  
EPI\_ISL\_425614 -----  
EPI\_ISL\_425635 -----  
EPI\_ISL\_426848 -----  
EPI\_ISL\_426850 -----  
EPI\_ISL\_426955 -----  
EPI\_ISL\_426963 -----

ORF1ab 3841 NIKLLGVGGKPCIKVATVQSKMSDVKCTSVVLLSVLQQLRVESSSKLWAQCVQLHNDILL  
EPI\_ISL\_411066 -----  
EPI\_ISL\_413522 -----  
EPI\_ISL\_413558 -----  
EPI\_ISL\_413559 -----  
EPI\_ISL\_413561 -----  
EPI\_ISL\_413692 -----  
EPI\_ISL\_413693 -----  
EPI\_ISL\_413694 -----  
EPI\_ISL\_414692 -----  
EPI\_ISL\_424359 -----  
EPI\_ISL\_424396 -----  
EPI\_ISL\_424399 -----  
EPI\_ISL\_425530 -----  
EPI\_ISL\_425561 -----  
EPI\_ISL\_425614 -----  
EPI\_ISL\_425635 -----  
EPI\_ISL\_426848 -----  
EPI\_ISL\_426850 -----  
EPI\_ISL\_426955 -----  
EPI\_ISL\_426963 -----

ORF1ab 3901 AKDTTEAFEKMSVLLSVLLSMQGAVDINKLCEEMLDNRATLQAIASEFSSLPSYAAFATA  
EPI\_ISL\_411066 -----  
EPI\_ISL\_413522 -----  
EPI\_ISL\_413558 -----  
EPI\_ISL\_413559 -----  
EPI\_ISL\_413561 -----  
EPI\_ISL\_413692 -----  
EPI\_ISL\_413693 -----  
EPI\_ISL\_413694 -----  
EPI\_ISL\_414692 -----  
EPI\_ISL\_424359 -----  
EPI\_ISL\_424396 -----  
EPI\_ISL\_424399 -----  
EPI\_ISL\_425530 -----  
EPI\_ISL\_425561 -----  
EPI\_ISL\_425614 -----  
EPI\_ISL\_425635 -----  
EPI\_ISL\_426848 -----  
EPI\_ISL\_426850 -----  
EPI\_ISL\_426955 -----



ORF1ab 3961 QEAYEQAVANGDSEVVLKLLKSLNVAKSEFDRDAAMQRKLEKMDAQAMTQMYKQARSED  
EPI\_ISL\_411066 -----  
EPI\_ISL\_413522 -----  
EPI\_ISL\_413558 -----  
EPI\_ISL\_413559 -----  
EPI\_ISL\_413561 -----  
EPI\_ISL\_413692 -----  
EPI\_ISL\_413693 -----  
EPI\_ISL\_413694 -----  
EPI\_ISL\_414692 -----  
EPI\_ISL\_424359 -----  
EPI\_ISL\_424396 -----  
EPI\_ISL\_424399 -----  
EPI\_ISL\_425530 -----  
EPI\_ISL\_425561 -----  
EPI\_ISL\_425614 -----  
EPI\_ISL\_425635 -----  
EPI\_ISL\_426848 -----  
EPI\_ISL\_426850 -----  
EPI\_ISL\_426955 -----  
EPI\_ISL\_426963 -----

ORF1ab 4021 KRAKVTSAMQTMLEFTMLRKLNDNDALNNIINNARDGCVPLNIIPLTTAAKLMVVI PDYNTY  
EPI\_ISL\_411066 -----  
EPI\_ISL\_413522 -----  
EPI\_ISL\_413558 -----  
EPI\_ISL\_413559 -----  
EPI\_ISL\_413561 -----  
EPI\_ISL\_413692 -----  
EPI\_ISL\_413693 -----  
EPI\_ISL\_413694 -----  
EPI\_ISL\_414692 -----  
EPI\_ISL\_424359 -----  
EPI\_ISL\_424396 -----  
EPI\_ISL\_424399 -----  
EPI\_ISL\_425530 -----  
EPI\_ISL\_425561 -----  
EPI\_ISL\_425614 -----  
EPI\_ISL\_425635 -----  
EPI\_ISL\_426848 -----  
EPI\_ISL\_426850 -----  
EPI\_ISL\_426955 -----  
EPI\_ISL\_426963 -----

ORF1ab 4081 KNTCDGTTFTYASALWEIQVVDADSKIVQLSEISMDNSPNLAWPLIVTALRANSVAVKLQ  
EPI\_ISL\_411066 -----  
EPI\_ISL\_413522 -----  
EPI\_ISL\_413558 -----  
EPI\_ISL\_413559 -----  
EPI\_ISL\_413561 -----  
EPI\_ISL\_413692 -----  
EPI\_ISL\_413693 -----  
EPI\_ISL\_413694 -----  
EPI\_ISL\_414692 -----  
EPI\_ISL\_424359 -----  
EPI\_ISL\_424396 -----  
EPI\_ISL\_424399 -----  
EPI\_ISL\_425530 -----  
EPI\_ISL\_425561 -----  
EPI\_ISL\_425614 -----  
EPI\_ISL\_425635 -----  
EPI\_ISL\_426848 -----  
EPI\_ISL\_426850 -----  
EPI\_ISL\_426955 -----



ORF1ab 4141 NNELSPVALRQMSCAAGTTQTACTDDNALAYNNTTKGGRFVLALLSDLQDLKWARFPKSD  
EPI\_ISL\_411066 -----  
EPI\_ISL\_413522 -----  
EPI\_ISL\_413558 -----  
EPI\_ISL\_413559 -----  
EPI\_ISL\_413561 -----  
EPI\_ISL\_413692 -----  
EPI\_ISL\_413693 -----  
EPI\_ISL\_413694 -----  
EPI\_ISL\_414692 -----  
EPI\_ISL\_424359 -----  
EPI\_ISL\_424396 -----  
EPI\_ISL\_424399 -----  
EPI\_ISL\_425530 -----  
EPI\_ISL\_425561 -----  
EPI\_ISL\_425614 -----  
EPI\_ISL\_425635 -----  
EPI\_ISL\_426848 -----  
EPI\_ISL\_426850 -----  
EPI\_ISL\_426955 -----  
EPI\_ISL\_426963 -----

ORF1ab 4201 GTGTIYTELEPPCRFVTDTPKGPVKYLYFIKGLNNLNRMVGLGSLAATVRLQAGNATEV  
EPI\_ISL\_411066 -----  
EPI\_ISL\_413522 -----  
EPI\_ISL\_413558 -----  
EPI\_ISL\_413559 -----  
EPI\_ISL\_413561 -----  
EPI\_ISL\_413692 -----  
EPI\_ISL\_413693 -----  
EPI\_ISL\_413694 -----  
EPI\_ISL\_414692 -----  
EPI\_ISL\_424359 -----  
EPI\_ISL\_424396 -----  
EPI\_ISL\_424399 -----  
EPI\_ISL\_425530 -----  
EPI\_ISL\_425561 -----  
EPI\_ISL\_425614 -----  
EPI\_ISL\_425635 -----  
EPI\_ISL\_426848 -----  
EPI\_ISL\_426850 -----  
EPI\_ISL\_426955 -----  
EPI\_ISL\_426963 -----

ORF1ab 4261 PANSTVLSFCAFAVDAAKAYKDYLASGGQPITNCVKMLCTHTGTGQAITVTPEANMDQES  
EPI\_ISL\_411066 -----  
EPI\_ISL\_413522 -----  
EPI\_ISL\_413558 -----  
EPI\_ISL\_413559 -----  
EPI\_ISL\_413561 -----  
EPI\_ISL\_413692 -----  
EPI\_ISL\_413693 -----  
EPI\_ISL\_413694 -----  
EPI\_ISL\_414692 -----  
EPI\_ISL\_424359 -----  
EPI\_ISL\_424396 -----  
EPI\_ISL\_424399 -----  
EPI\_ISL\_425530 -----  
EPI\_ISL\_425561 -----  
EPI\_ISL\_425614 -----  
EPI\_ISL\_425635 -----  
EPI\_ISL\_426848 -----  
EPI\_ISL\_426850 -----  
EPI\_ISL\_426955 -----



ORF1ab 4321 FGGASCCLYCRCHIDHPNPKGFCDLKGKYVQIPTTCANDPVGFTLKNNTVCTVCGMWKGYG  
EPI\_ISL\_411066 -----  
EPI\_ISL\_413522 -----  
EPI\_ISL\_413558 -----  
EPI\_ISL\_413559 -----  
EPI\_ISL\_413561 -----  
EPI\_ISL\_413692 -----  
EPI\_ISL\_413693 -----  
EPI\_ISL\_413694 -----  
EPI\_ISL\_414692 -----  
EPI\_ISL\_424359 -----  
EPI\_ISL\_424396 -----  
EPI\_ISL\_424399 -----  
EPI\_ISL\_425530 -----  
EPI\_ISL\_425561 -----  
EPI\_ISL\_425614 -----  
EPI\_ISL\_425635 -----  
EPI\_ISL\_426848 -----  
EPI\_ISL\_426850 -----  
EPI\_ISL\_426955 -----  
EPI\_ISL\_426963 -----

ORF1ab 4381 CSCDQLREPLQSDAQSFNLRVCGVSAARLTPCGTGTSTDVVYRAFDIYNDKVAGFAKF  
EPI\_ISL\_411066 -----  
EPI\_ISL\_413522 -----  
EPI\_ISL\_413558 -----  
EPI\_ISL\_413559 -----  
EPI\_ISL\_413561 -----  
EPI\_ISL\_413692 -----  
EPI\_ISL\_413693 -----  
EPI\_ISL\_413694 -----  
EPI\_ISL\_414692 -----  
EPI\_ISL\_424359 -----  
EPI\_ISL\_424396 -----  
EPI\_ISL\_424399 -----  
EPI\_ISL\_425530 -----  
EPI\_ISL\_425561 -----  
EPI\_ISL\_425614 -----  
EPI\_ISL\_425635 -----  
EPI\_ISL\_426848 -----  
EPI\_ISL\_426850 -----  
EPI\_ISL\_426955 -----  
EPI\_ISL\_426963 -----

ORF1ab 4441 LKTNCCRFQEKDEDDNLI DSYFVVKRHTFSNYQHEETIYNLLKDCPAVAKHDFKFRIDG  
EPI\_ISL\_411066 -----  
EPI\_ISL\_413522 -----  
EPI\_ISL\_413558 -----  
EPI\_ISL\_413559 -----  
EPI\_ISL\_413561 -----  
EPI\_ISL\_413692 -----  
EPI\_ISL\_413693 -----  
EPI\_ISL\_413694 -----  
EPI\_ISL\_414692 -----  
EPI\_ISL\_424359 -----  
EPI\_ISL\_424396 -----  
EPI\_ISL\_424399 -----  
EPI\_ISL\_425530 -----  
EPI\_ISL\_425561 -----  
EPI\_ISL\_425614 -----  
EPI\_ISL\_425635 -----  
EPI\_ISL\_426848 -----  
EPI\_ISL\_426850 -----  
EPI\_ISL\_426955 -----





ORF1ab 4501 DMVPHISRQRLTKYTMADLVYALRHFDEGNCDTLKEILVTYNCCDDDYFNKKDWYDFVEN  
EPI\_ISL\_411066 -----  
EPI\_ISL\_413522 -----  
EPI\_ISL\_413558 -----  
EPI\_ISL\_413559 -----  
EPI\_ISL\_413561 -----  
EPI\_ISL\_413692 -----  
EPI\_ISL\_413693 -----  
EPI\_ISL\_413694 -----  
EPI\_ISL\_414692 -----  
EPI\_ISL\_424359 -----  
EPI\_ISL\_424396 -----  
EPI\_ISL\_424399 -----  
EPI\_ISL\_425530 -----  
EPI\_ISL\_425561 -----  
EPI\_ISL\_425614 -----  
EPI\_ISL\_425635 -----  
EPI\_ISL\_426848 -----  
EPI\_ISL\_426850 -----  
EPI\_ISL\_426955 -----  
EPI\_ISL\_426963 -----

ORF1ab 4561 PDILRVYANLGERVRQALLKTIVQFCAMRNAGIVGVLTLDNQDLNNGWYDFGDFIQTTTPG  
EPI\_ISL\_411066 -----  
EPI\_ISL\_413522 -----  
EPI\_ISL\_413558 -----  
EPI\_ISL\_413559 -----  
EPI\_ISL\_413561 -----  
EPI\_ISL\_413692 -----  
EPI\_ISL\_413693 -----  
EPI\_ISL\_413694 -----  
EPI\_ISL\_414692 -----  
EPI\_ISL\_424359 -----  
EPI\_ISL\_424396 -----  
EPI\_ISL\_424399 -----  
EPI\_ISL\_425530 -----  
EPI\_ISL\_425561 -----  
EPI\_ISL\_425614 -----  
EPI\_ISL\_425635 -----  
EPI\_ISL\_426848 -----  
EPI\_ISL\_426850 -----  
EPI\_ISL\_426955 -----  
EPI\_ISL\_426963 -----

ORF1ab 4621 SGVPVVDSSYSLMLPILTLTRALTAESHVDTDLTKPYIKWDLLKYDFTEERLKLFDRYFK  
EPI\_ISL\_411066 -----  
EPI\_ISL\_413522 -----  
EPI\_ISL\_413558 -----  
EPI\_ISL\_413559 -----  
EPI\_ISL\_413561 -----  
EPI\_ISL\_413692 -----  
EPI\_ISL\_413693 -----  
EPI\_ISL\_413694 -----  
EPI\_ISL\_414692 -----  
EPI\_ISL\_424359 -----  
EPI\_ISL\_424396 -----  
EPI\_ISL\_424399 -----  
EPI\_ISL\_425530 -----  
EPI\_ISL\_425561 -----  
EPI\_ISL\_425614 -----  
EPI\_ISL\_425635 -----  
EPI\_ISL\_426848 -----  
EPI\_ISL\_426850 -----  
EPI\_ISL\_426955 -----



ORF1ab 4681 YWDQTYHPNCVNCLDDRCILHCANFNVLVSTVFPPTSFGPLVVRKIFVDGVPFVVSTGYHF  
EPI\_ISL\_411066 -----  
EPI\_ISL\_413522 -----  
EPI\_ISL\_413558 -----  
EPI\_ISL\_413559 -----  
EPI\_ISL\_413561 -----  
EPI\_ISL\_413692 -----  
EPI\_ISL\_413693 -----  
EPI\_ISL\_413694 -----  
EPI\_ISL\_414692 -----  
EPI\_ISL\_424359 -----  
EPI\_ISL\_424396 -----  
EPI\_ISL\_424399 -----  
EPI\_ISL\_425530 -----  
EPI\_ISL\_425561 -----  
EPI\_ISL\_425614 -----  
EPI\_ISL\_425635 -----  
EPI\_ISL\_426848 -----  
EPI\_ISL\_426850 -----  
EPI\_ISL\_426955 -----  
EPI\_ISL\_426963 -----

ORF1ab 4741 RELGVVHNQDVNLHSSRSLSFKELLVYAADPAMHAASGNLLLDKRTTCFSVAALTNNVAFQ  
EPI\_ISL\_411066 -----  
EPI\_ISL\_413522 -----  
EPI\_ISL\_413558 -----  
EPI\_ISL\_413559 -----  
EPI\_ISL\_413561 -----  
EPI\_ISL\_413692 -----  
EPI\_ISL\_413693 -----  
EPI\_ISL\_413694 -----  
EPI\_ISL\_414692 -----  
EPI\_ISL\_424359 -----  
EPI\_ISL\_424396 -----  
EPI\_ISL\_424399 -----  
EPI\_ISL\_425530 -----  
EPI\_ISL\_425561 -----  
EPI\_ISL\_425614 -----  
EPI\_ISL\_425635 -----  
EPI\_ISL\_426848 -----  
EPI\_ISL\_426850 -----  
EPI\_ISL\_426955 -----  
EPI\_ISL\_426963 -----

ORF1ab 4801 TVKPGNFNKDFYDFAVSKGFFKEGSSVELKHFFFAQDGNAAISDYDYRYNLPTMCDIRQ  
EPI\_ISL\_411066 -----  
EPI\_ISL\_413522 -----  
EPI\_ISL\_413558 -----  
EPI\_ISL\_413559 -----  
EPI\_ISL\_413561 -----  
EPI\_ISL\_413692 -----  
EPI\_ISL\_413693 -----  
EPI\_ISL\_413694 -----  
EPI\_ISL\_414692 -----  
EPI\_ISL\_424359 -----  
EPI\_ISL\_424396 -----  
EPI\_ISL\_424399 -----  
EPI\_ISL\_425530 -----  
EPI\_ISL\_425561 -----  
EPI\_ISL\_425614 -----  
EPI\_ISL\_425635 -----  
EPI\_ISL\_426848 -----  
EPI\_ISL\_426850 -----  
EPI\_ISL\_426955 -----



ORF1ab 4861 LLFVVEVVDKYFDCYDGGCINANQVIVNNLDKSAGFPFNKWKARLYYDSMSYEDQDALF  
EPI\_ISL\_411066 -----  
EPI\_ISL\_413522 -----  
EPI\_ISL\_413558 -----  
EPI\_ISL\_413559 -----  
EPI\_ISL\_413561 -----  
EPI\_ISL\_413692 -----  
EPI\_ISL\_413693 -----  
EPI\_ISL\_413694 -----  
EPI\_ISL\_414692 -----  
EPI\_ISL\_424359 -----  
EPI\_ISL\_424396 -----  
EPI\_ISL\_424399 -----  
EPI\_ISL\_425530 -----  
EPI\_ISL\_425561 -----  
EPI\_ISL\_425614 -----  
EPI\_ISL\_425635 -----  
EPI\_ISL\_426848 -----  
EPI\_ISL\_426850 -----  
EPI\_ISL\_426955 -----  
EPI\_ISL\_426963 -----

ORF1ab 4921 AYTKRNVIPTITQMNLYAISAKNRARTVAGVSICTMTNRQFHQKLLKLSIAATRGTAVV  
EPI\_ISL\_411066 -----  
EPI\_ISL\_413522 -----  
EPI\_ISL\_413558 -----  
EPI\_ISL\_413559 -----  
EPI\_ISL\_413561 -----  
EPI\_ISL\_413692 -----  
EPI\_ISL\_413693 -----  
EPI\_ISL\_413694 -----  
EPI\_ISL\_414692 -----  
EPI\_ISL\_424359 -----  
EPI\_ISL\_424396 -----  
EPI\_ISL\_424399 -----  
EPI\_ISL\_425530 -----  
EPI\_ISL\_425561 -----  
EPI\_ISL\_425614 -----  
EPI\_ISL\_425635 -----  
EPI\_ISL\_426848 -----  
EPI\_ISL\_426850 -----  
EPI\_ISL\_426955 -----  
EPI\_ISL\_426963 -----

ORF1ab 4981 IGTSKFYGGWHNMLKTVYSDVENPHLMGWDPKCDRAMPNMLRIMASLVLARKHTTCCSL  
EPI\_ISL\_411066 -----  
EPI\_ISL\_413522 -----  
EPI\_ISL\_413558 -----  
EPI\_ISL\_413559 -----  
EPI\_ISL\_413561 -----  
EPI\_ISL\_413692 -----  
EPI\_ISL\_413693 -----  
EPI\_ISL\_413694 -----  
EPI\_ISL\_414692 -----  
EPI\_ISL\_424359 -----  
EPI\_ISL\_424396 -----  
EPI\_ISL\_424399 -----  
EPI\_ISL\_425530 -----  
EPI\_ISL\_425561 -----  
EPI\_ISL\_425614 -----  
EPI\_ISL\_425635 -----  
EPI\_ISL\_426848 -----  
EPI\_ISL\_426850 -----  
EPI\_ISL\_426955 -----



ORF1ab 5041 SHRFYRLANECAQVLSEMVMCGGSLYVKPGGTSSGDATTAYANSVFNICQAVTANVNALL  
EPI\_ISL\_411066 -----  
EPI\_ISL\_413522 -----  
EPI\_ISL\_413558 -----  
EPI\_ISL\_413559 -----  
EPI\_ISL\_413561 -----  
EPI\_ISL\_413692 -----  
EPI\_ISL\_413693 -----  
EPI\_ISL\_413694 -----  
EPI\_ISL\_414692 -----  
EPI\_ISL\_424359 -----  
EPI\_ISL\_424396 -----  
EPI\_ISL\_424399 -----  
EPI\_ISL\_425530 -----  
EPI\_ISL\_425561 -----  
EPI\_ISL\_425614 -----  
EPI\_ISL\_425635 -----  
EPI\_ISL\_426848 -----  
EPI\_ISL\_426850 -----  
EPI\_ISL\_426955 -----  
EPI\_ISL\_426963 -----

ORF1ab 5101 STDGNKIADKYVRNLQHRLYECLYRNRDVRTDFVNEFYAYLRKHFSSMILSDDAVVCFNS  
EPI\_ISL\_411066 -----  
EPI\_ISL\_413522 -----  
EPI\_ISL\_413558 -----  
EPI\_ISL\_413559 -----  
EPI\_ISL\_413561 -----  
EPI\_ISL\_413692 -----  
EPI\_ISL\_413693 -----  
EPI\_ISL\_413694 -----  
EPI\_ISL\_414692 -----  
EPI\_ISL\_424359 -----  
EPI\_ISL\_424396 -----  
EPI\_ISL\_424399 -----  
EPI\_ISL\_425530 -----  
EPI\_ISL\_425561 -----  
EPI\_ISL\_425614 -----  
EPI\_ISL\_425635 -----  
EPI\_ISL\_426848 -----  
EPI\_ISL\_426850 -----  
EPI\_ISL\_426955 -----  
EPI\_ISL\_426963 -----

ORF1ab 5161 TYASQGLVASIKNFKSVLYYQNNVFMSEAKCWTETDLTKGPHEFCSQHTMLVKQGDDYVY  
EPI\_ISL\_411066 -----  
EPI\_ISL\_413522 -----  
EPI\_ISL\_413558 -----  
EPI\_ISL\_413559 -----  
EPI\_ISL\_413561 -----  
EPI\_ISL\_413692 -----  
EPI\_ISL\_413693 -----  
EPI\_ISL\_413694 -----  
EPI\_ISL\_414692 -----  
EPI\_ISL\_424359 -----  
EPI\_ISL\_424396 -----  
EPI\_ISL\_424399 -----  
EPI\_ISL\_425530 -----  
EPI\_ISL\_425561 -----  
EPI\_ISL\_425614 -----  
EPI\_ISL\_425635 -----  
EPI\_ISL\_426848 -----  
EPI\_ISL\_426850 -----  
EPI\_ISL\_426955 -----





ORF1ab 5221 LPYPDPSRILGAGCFVDDIVKTDGTLMIERFVSLAIDAYPLTKHPNQEYADVFLHLYLQYI  
EPI\_ISL\_411066 -----  
EPI\_ISL\_413522 -----  
EPI\_ISL\_413558 -----  
EPI\_ISL\_413559 -----  
EPI\_ISL\_413561 -----  
EPI\_ISL\_413692 -----  
EPI\_ISL\_413693 -----  
EPI\_ISL\_413694 -----  
EPI\_ISL\_414692 -----  
EPI\_ISL\_424359 -----  
EPI\_ISL\_424396 -----  
EPI\_ISL\_424399 -----  
EPI\_ISL\_425530 -----  
EPI\_ISL\_425561 -----  
EPI\_ISL\_425614 -----  
EPI\_ISL\_425635 -----  
EPI\_ISL\_426848 -----  
EPI\_ISL\_426850 -----  
EPI\_ISL\_426955 -----  
EPI\_ISL\_426963 -----

ORF1ab 5281 RKLHDELGTGHMLDMYSVMLTNDNTSRYWEPEFYEAMYTPHTVLQAVGACVLCNSQTSLRC  
EPI\_ISL\_411066 -----  
EPI\_ISL\_413522 -----  
EPI\_ISL\_413558 -----  
EPI\_ISL\_413559 -----  
EPI\_ISL\_413561 -----  
EPI\_ISL\_413692 -----  
EPI\_ISL\_413693 -----  
EPI\_ISL\_413694 -----  
EPI\_ISL\_414692 -----  
EPI\_ISL\_424359 -----  
EPI\_ISL\_424396 -----  
EPI\_ISL\_424399 -----  
EPI\_ISL\_425530 -----  
EPI\_ISL\_425561 -----  
EPI\_ISL\_425614 -----  
EPI\_ISL\_425635 -----  
EPI\_ISL\_426848 -----  
EPI\_ISL\_426850 -----  
EPI\_ISL\_426955 -----  
EPI\_ISL\_426963 -----

ORF1ab 5341 GACIRRPFLCCKCCYDHVISTSHKLVLSVNPYVCNAPGCDVTDVTDVTLQLYLGGMSSYYCKSHK  
EPI\_ISL\_411066 -----  
EPI\_ISL\_413522 -----  
EPI\_ISL\_413558 -----  
EPI\_ISL\_413559 -----  
EPI\_ISL\_413561 -----  
EPI\_ISL\_413692 -----  
EPI\_ISL\_413693 -----  
EPI\_ISL\_413694 -----  
EPI\_ISL\_414692 -----  
EPI\_ISL\_424359 -----  
EPI\_ISL\_424396 -----  
EPI\_ISL\_424399 -----  
EPI\_ISL\_425530 -----  
EPI\_ISL\_425561 -----  
EPI\_ISL\_425614 -----  
EPI\_ISL\_425635 -----  
EPI\_ISL\_426848 -----  
EPI\_ISL\_426850 -----  
EPI\_ISL\_426955 -----



ORF1ab 5401 PPISFPLCANGQVFGLYKNTCVGSDNVTDFNAIATCDWTNAGDYILANTCTERLKLFAAE  
EPI\_ISL\_411066 -----  
EPI\_ISL\_413522 -----  
EPI\_ISL\_413558 -----  
EPI\_ISL\_413559 -----  
EPI\_ISL\_413561 -----  
EPI\_ISL\_413692 -----  
EPI\_ISL\_413693 -----  
EPI\_ISL\_413694 -----  
EPI\_ISL\_414692 -----  
EPI\_ISL\_424359 -----  
EPI\_ISL\_424396 -----  
EPI\_ISL\_424399 -----  
EPI\_ISL\_425530 -----  
EPI\_ISL\_425561 -----  
EPI\_ISL\_425614 -----  
EPI\_ISL\_425635 -----  
EPI\_ISL\_426848 -----  
EPI\_ISL\_426850 -----  
EPI\_ISL\_426955 -----  
EPI\_ISL\_426963 -----

ORF1ab 5461 TLKATEETFKLSYGIATVREVLSDRELHLSWEVGKPRPPLNRNYVFTGYRVTKNSKVQIG  
EPI\_ISL\_411066 -----  
EPI\_ISL\_413522 -----  
EPI\_ISL\_413558 -----  
EPI\_ISL\_413559 -----  
EPI\_ISL\_413561 -----  
EPI\_ISL\_413692 -----  
EPI\_ISL\_413693 -----  
EPI\_ISL\_413694 -----  
EPI\_ISL\_414692 -----  
EPI\_ISL\_424359 -----  
EPI\_ISL\_424396 -----  
EPI\_ISL\_424399 -----  
EPI\_ISL\_425530 -----  
EPI\_ISL\_425561 -----  
EPI\_ISL\_425614 -----  
EPI\_ISL\_425635 -----  
EPI\_ISL\_426848 -----  
EPI\_ISL\_426850 -----  
EPI\_ISL\_426955 -----  
EPI\_ISL\_426963 -----

ORF1ab 5521 EYTFEKGDYGDVVYRGTTTTYKLNVDYFVLTSHVMPLSAPTLVLPQEHYVRITGLYPTL  
EPI\_ISL\_411066 -----  
EPI\_ISL\_413522 -----  
EPI\_ISL\_413558 -----  
EPI\_ISL\_413559 -----  
EPI\_ISL\_413561 -----  
EPI\_ISL\_413692 -----  
EPI\_ISL\_413693 -----  
EPI\_ISL\_413694 -----  
EPI\_ISL\_414692 -----  
EPI\_ISL\_424359 -----  
EPI\_ISL\_424396 -----  
EPI\_ISL\_424399 -----  
EPI\_ISL\_425530 -----  
EPI\_ISL\_425561 -----  
EPI\_ISL\_425614 -----  
EPI\_ISL\_425635 -----  
EPI\_ISL\_426848 -----  
EPI\_ISL\_426850 -----  
EPI\_ISL\_426955 -----



ORF1ab 5581 NISDEFSSNVANYQKVGMQKYSTLQGPPGTGKSHFAIGLALYYPSARIVYTACSHAAVDA  
EPI\_ISL\_411066 -----  
EPI\_ISL\_413522 -----  
EPI\_ISL\_413558 -----  
EPI\_ISL\_413559 -----  
EPI\_ISL\_413561 -----  
EPI\_ISL\_413692 -----  
EPI\_ISL\_413693 -----  
EPI\_ISL\_413694 -----  
EPI\_ISL\_414692 -----  
EPI\_ISL\_424359 -----  
EPI\_ISL\_424396 -----  
EPI\_ISL\_424399 -----  
EPI\_ISL\_425530 -----  
EPI\_ISL\_425561 -----  
EPI\_ISL\_425614 -----  
EPI\_ISL\_425635 -----  
EPI\_ISL\_426848 -----  
EPI\_ISL\_426850 -----  
EPI\_ISL\_426955 -----  
EPI\_ISL\_426963 -----

ORF1ab 5641 LCEKALKYLPIDKCSRIIPARARVECFDKFKVNSTLEQYVFCTVNALPETTADIVVFDEI  
EPI\_ISL\_411066 -----  
EPI\_ISL\_413522 -----  
EPI\_ISL\_413558 -----  
EPI\_ISL\_413559 -----  
EPI\_ISL\_413561 -----  
EPI\_ISL\_413692 -----  
EPI\_ISL\_413693 -----  
EPI\_ISL\_413694 -----  
EPI\_ISL\_414692 -----  
EPI\_ISL\_424359 -----  
EPI\_ISL\_424396 -----  
EPI\_ISL\_424399 -----  
EPI\_ISL\_425530 -----  
EPI\_ISL\_425561 -----  
EPI\_ISL\_425614 -----  
EPI\_ISL\_425635 -----  
EPI\_ISL\_426848 -----  
EPI\_ISL\_426850 -----  
EPI\_ISL\_426955 -----  
EPI\_ISL\_426963 -----

ORF1ab 5701 SMATNYDLSVVNARLRKHYVYIGDPAQLPAPRTLLTKGTLEPEYFNSVCRLMKTIGPDM  
EPI\_ISL\_411066 -----  
EPI\_ISL\_413522 -----  
EPI\_ISL\_413558 -----  
EPI\_ISL\_413559 -----  
EPI\_ISL\_413561 -----  
EPI\_ISL\_413692 -----  
EPI\_ISL\_413693 -----  
EPI\_ISL\_413694 -----  
EPI\_ISL\_414692 -----  
EPI\_ISL\_424359 -----  
EPI\_ISL\_424396 -----  
EPI\_ISL\_424399 -----  
EPI\_ISL\_425530 -----  
EPI\_ISL\_425561 -----  
EPI\_ISL\_425614 -----  
EPI\_ISL\_425635 -----  
EPI\_ISL\_426848 -----  
EPI\_ISL\_426850 -----  
EPI\_ISL\_426955 -----



ORF1ab 5761 FLGTCRRCPAEIVDVTVSALVYDNKCLKAHKDKSAQCCKMFYKGVITHDVSSAINRPQIGVV  
EPI\_ISL\_411066 -----  
EPI\_ISL\_413522 -----  
EPI\_ISL\_413558 -----  
EPI\_ISL\_413559 -----  
EPI\_ISL\_413561 -----  
EPI\_ISL\_413692 -----  
EPI\_ISL\_413693 -----  
EPI\_ISL\_413694 -----  
EPI\_ISL\_414692 -----  
EPI\_ISL\_424359 -----  
EPI\_ISL\_424396 -----  
EPI\_ISL\_424399 -----  
EPI\_ISL\_425530 -----  
EPI\_ISL\_425561 -----  
EPI\_ISL\_425614 -----  
EPI\_ISL\_425635 -----  
EPI\_ISL\_426848 -----  
EPI\_ISL\_426850 -----  
EPI\_ISL\_426955 -----  
EPI\_ISL\_426963 -----

ORF1ab 5821 REFLTRNPAWRKAVFISPYN SQNAVASKILGLPTQTVDSSQGSEYDYVIFTQTTEAHSC  
EPI\_ISL\_411066 -----  
EPI\_ISL\_413522 -----  
EPI\_ISL\_413558 -----  
EPI\_ISL\_413559 -----  
EPI\_ISL\_413561 -----  
EPI\_ISL\_413692 -----  
EPI\_ISL\_413693 -----  
EPI\_ISL\_413694 -----  
EPI\_ISL\_414692 -----  
EPI\_ISL\_424359 -----  
EPI\_ISL\_424396 -----  
EPI\_ISL\_424399 -----  
EPI\_ISL\_425530 -----  
EPI\_ISL\_425561 -----  
EPI\_ISL\_425614 -----  
EPI\_ISL\_425635 -----  
EPI\_ISL\_426848 -----  
EPI\_ISL\_426850 -----  
EPI\_ISL\_426955 -----  
EPI\_ISL\_426963 -----

ORF1ab 5881 NVNRFNVAITRAKVGILCIMSDDRDLYDKLQFTSLEIPRRNVATLQAENV TGLFKDCSKVI  
EPI\_ISL\_411066 -----  
EPI\_ISL\_413522 -----  
EPI\_ISL\_413558 -----  
EPI\_ISL\_413559 -----  
EPI\_ISL\_413561 -----  
EPI\_ISL\_413692 -----  
EPI\_ISL\_413693 -----  
EPI\_ISL\_413694 -----  
EPI\_ISL\_414692 -----  
EPI\_ISL\_424359 -----  
EPI\_ISL\_424396 -----  
EPI\_ISL\_424399 -----  
EPI\_ISL\_425530 -----  
EPI\_ISL\_425561 -----  
EPI\_ISL\_425614 -----  
EPI\_ISL\_425635 -----  
EPI\_ISL\_426848 -----  
EPI\_ISL\_426850 -----  
EPI\_ISL\_426955 -----





ORF1ab 5941 TGLHPTQAPTHLSVDTKFKTEGLCVDIPGIPKDMTYRRLISMMGFKMNYQVNGYPNMFIT  
EPI\_ISL\_411066 -----  
EPI\_ISL\_413522 -----  
EPI\_ISL\_413558 -----  
EPI\_ISL\_413559 -----  
EPI\_ISL\_413561 -----  
EPI\_ISL\_413692 -----  
EPI\_ISL\_413693 -----  
EPI\_ISL\_413694 -----  
EPI\_ISL\_414692 -----  
EPI\_ISL\_424359 -----  
EPI\_ISL\_424396 -----  
EPI\_ISL\_424399 -----  
EPI\_ISL\_425530 -----  
EPI\_ISL\_425561 -----  
EPI\_ISL\_425614 -----  
EPI\_ISL\_425635 -----  
EPI\_ISL\_426848 -----  
EPI\_ISL\_426850 -----  
EPI\_ISL\_426955 -----  
EPI\_ISL\_426963 -----

ORF1ab 6001 REEAIRHVRAWIGFDVEGCHATREAVGTNLPLQLGFSTGVNLVAVPTGYVDTPNNTDFSR  
EPI\_ISL\_411066 -----  
EPI\_ISL\_413522 -----  
EPI\_ISL\_413558 -----  
EPI\_ISL\_413559 -----  
EPI\_ISL\_413561 -----  
EPI\_ISL\_413692 -----  
EPI\_ISL\_413693 -----  
EPI\_ISL\_413694 -----  
EPI\_ISL\_414692 -----  
EPI\_ISL\_424359 -----  
EPI\_ISL\_424396 -----  
EPI\_ISL\_424399 -----  
EPI\_ISL\_425530 -----  
EPI\_ISL\_425561 -----  
EPI\_ISL\_425614 -----  
EPI\_ISL\_425635 -----  
EPI\_ISL\_426848 -----  
EPI\_ISL\_426850 -----  
EPI\_ISL\_426955 -----  
EPI\_ISL\_426963 -----

ORF1ab 6061 VSAKPPPGDQFKHLIPLMYKGLPWNVVRKIVQMLSDTLKNLSDRVVFVLWAHGFELTSM  
EPI\_ISL\_411066 -----  
EPI\_ISL\_413522 -----  
EPI\_ISL\_413558 -----  
EPI\_ISL\_413559 -----  
EPI\_ISL\_413561 -----  
EPI\_ISL\_413692 -----  
EPI\_ISL\_413693 -----  
EPI\_ISL\_413694 -----  
EPI\_ISL\_414692 -----  
EPI\_ISL\_424359 -----  
EPI\_ISL\_424396 -----  
EPI\_ISL\_424399 -----  
EPI\_ISL\_425530 -----  
EPI\_ISL\_425561 -----  
EPI\_ISL\_425614 -----  
EPI\_ISL\_425635 -----  
EPI\_ISL\_426848 -----  
EPI\_ISL\_426850 -----  
EPI\_ISL\_426955 -----



ORF1ab 6121 KYFVKIGPERTCCLCDRRATCFSTASDTYACWHHSIGFDYVYNPFMIDVQQWGFTGNLQS  
EPI\_ISL\_411066 -----  
EPI\_ISL\_413522 -----  
EPI\_ISL\_413558 -----  
EPI\_ISL\_413559 -----  
EPI\_ISL\_413561 -----  
EPI\_ISL\_413692 -----  
EPI\_ISL\_413693 -----  
EPI\_ISL\_413694 -----  
EPI\_ISL\_414692 -----  
EPI\_ISL\_424359 -----  
EPI\_ISL\_424396 -----  
EPI\_ISL\_424399 -----  
EPI\_ISL\_425530 -----  
EPI\_ISL\_425561 -----  
EPI\_ISL\_425614 -----  
EPI\_ISL\_425635 -----  
EPI\_ISL\_426848 -----  
EPI\_ISL\_426850 -----  
EPI\_ISL\_426955 -----  
EPI\_ISL\_426963 -----

ORF1ab 6181 NHDLYCQVHGNAHVASCDAIMTRCLAVHECFVKRVDWTIEYPIIGDELKINAACRQVQHM  
EPI\_ISL\_411066 -----  
EPI\_ISL\_413522 -----  
EPI\_ISL\_413558 -----  
EPI\_ISL\_413559 -----  
EPI\_ISL\_413561 -----  
EPI\_ISL\_413692 -----  
EPI\_ISL\_413693 -----  
EPI\_ISL\_413694 -----  
EPI\_ISL\_414692 -----  
EPI\_ISL\_424359 -----  
EPI\_ISL\_424396 -----  
EPI\_ISL\_424399 -----  
EPI\_ISL\_425530 -----  
EPI\_ISL\_425561 -----  
EPI\_ISL\_425614 -----  
EPI\_ISL\_425635 -----  
EPI\_ISL\_426848 -----  
EPI\_ISL\_426850 -----  
EPI\_ISL\_426955 -----  
EPI\_ISL\_426963 -----

ORF1ab 6241 VVKAALLADKFPVLHDIGNPKAIKCVPQADVEWKFYDAQPCSDKAYKIEELFYSYATHSD  
EPI\_ISL\_411066 -----  
EPI\_ISL\_413522 -----  
EPI\_ISL\_413558 -----  
EPI\_ISL\_413559 -----  
EPI\_ISL\_413561 -----  
EPI\_ISL\_413692 -----  
EPI\_ISL\_413693 -----  
EPI\_ISL\_413694 -----  
EPI\_ISL\_414692 -----  
EPI\_ISL\_424359 -----  
EPI\_ISL\_424396 -----  
EPI\_ISL\_424399 -----  
EPI\_ISL\_425530 -----  
EPI\_ISL\_425561 -----  
EPI\_ISL\_425614 -----  
EPI\_ISL\_425635 -----  
EPI\_ISL\_426848 -----  
EPI\_ISL\_426850 -----  
EPI\_ISL\_426955 -----



ORF1ab 6301 KFTDGVCLFWNCNVDRYPANSIVCRFDTRVLSNLNLPGCDGGSLYVKNKHAHFTPAFDKSA  
EPI\_ISL\_411066 -----  
EPI\_ISL\_413522 -----  
EPI\_ISL\_413558 -----  
EPI\_ISL\_413559 -----  
EPI\_ISL\_413561 -----  
EPI\_ISL\_413692 -----  
EPI\_ISL\_413693 -----  
EPI\_ISL\_413694 -----  
EPI\_ISL\_414692 -----  
EPI\_ISL\_424359 -----  
EPI\_ISL\_424396 -----  
EPI\_ISL\_424399 -----  
EPI\_ISL\_425530 -----  
EPI\_ISL\_425561 -----  
EPI\_ISL\_425614 -----  
EPI\_ISL\_425635 -----  
EPI\_ISL\_426848 -----  
EPI\_ISL\_426850 -----  
EPI\_ISL\_426955 -----  
EPI\_ISL\_426963 -----

ORF1ab 6361 FVNLKQLPFFYYSDSPCESHGKQVVSDDIDYVPLKSATCITRCNLGGAVCRHHANEYRLYL  
EPI\_ISL\_411066 -----  
EPI\_ISL\_413522 -----  
EPI\_ISL\_413558 -----  
EPI\_ISL\_413559 -----  
EPI\_ISL\_413561 -----  
EPI\_ISL\_413692 -----  
EPI\_ISL\_413693 -----  
EPI\_ISL\_413694 -----  
EPI\_ISL\_414692 -----  
EPI\_ISL\_424359 -----  
EPI\_ISL\_424396 -----  
EPI\_ISL\_424399 -----  
EPI\_ISL\_425530 -----  
EPI\_ISL\_425561 -----  
EPI\_ISL\_425614 -----  
EPI\_ISL\_425635 -----  
EPI\_ISL\_426848 -----  
EPI\_ISL\_426850 -----  
EPI\_ISL\_426955 -----  
EPI\_ISL\_426963 -----

ORF1ab 6421 DAYNMMISAGFSLWVYKQFDTYNLWNTFTRLQSLNVAFNVVNKGHFDGQQGEVPSIIN  
EPI\_ISL\_411066 -----  
EPI\_ISL\_413522 -----  
EPI\_ISL\_413558 -----  
EPI\_ISL\_413559 -----  
EPI\_ISL\_413561 -----  
EPI\_ISL\_413692 -----  
EPI\_ISL\_413693 -----  
EPI\_ISL\_413694 -----  
EPI\_ISL\_414692 -----  
EPI\_ISL\_424359 -----  
EPI\_ISL\_424396 -----  
EPI\_ISL\_424399 -----  
EPI\_ISL\_425530 -----  
EPI\_ISL\_425561 -----  
EPI\_ISL\_425614 -----  
EPI\_ISL\_425635 -----  
EPI\_ISL\_426848 -----  
EPI\_ISL\_426850 -----  
EPI\_ISL\_426955 -----



ORF1ab 6481 NTVYTKVDGVDVELFENKTTLPVNVAFELWAKRNIKPVPEVKILNNLGVDIAANTVIWDY  
EPI\_ISL\_411066 -----  
EPI\_ISL\_413522 -----  
EPI\_ISL\_413558 -----  
EPI\_ISL\_413559 -----  
EPI\_ISL\_413561 -----  
EPI\_ISL\_413692 -----  
EPI\_ISL\_413693 -----  
EPI\_ISL\_413694 -----  
EPI\_ISL\_414692 -----  
EPI\_ISL\_424359 -----  
EPI\_ISL\_424396 -----  
EPI\_ISL\_424399 -----  
EPI\_ISL\_425530 -----  
EPI\_ISL\_425561 -----  
EPI\_ISL\_425614 -----  
EPI\_ISL\_425635 -----  
EPI\_ISL\_426848 -----  
EPI\_ISL\_426850 -----  
EPI\_ISL\_426955 -----  
EPI\_ISL\_426963 -----

ORF1ab 6541 KRDAHAHISTIGVCSMTDIAKKPTETICAPLTVFFDGRVDGQVDLFRNARNGVLITEGSV  
EPI\_ISL\_411066 -----  
EPI\_ISL\_413522 -----  
EPI\_ISL\_413558 -----  
EPI\_ISL\_413559 -----  
EPI\_ISL\_413561 -----  
EPI\_ISL\_413692 -----  
EPI\_ISL\_413693 -----  
EPI\_ISL\_413694 -----  
EPI\_ISL\_414692 -----  
EPI\_ISL\_424359 -----  
EPI\_ISL\_424396 -----  
EPI\_ISL\_424399 -----  
EPI\_ISL\_425530 -----  
EPI\_ISL\_425561 -----  
EPI\_ISL\_425614 -----  
EPI\_ISL\_425635 -----  
EPI\_ISL\_426848 -----  
EPI\_ISL\_426850 -----  
EPI\_ISL\_426955 -----  
EPI\_ISL\_426963 -----

ORF1ab 6601 KGLQPSVGPQASLNGVTLIGEAVKTQFNYYKKVDGVVQQLPETYFTQSRNLQEFKPRSQ  
EPI\_ISL\_411066 -----  
EPI\_ISL\_413522 -----  
EPI\_ISL\_413558 -----  
EPI\_ISL\_413559 -----  
EPI\_ISL\_413561 -----  
EPI\_ISL\_413692 -----  
EPI\_ISL\_413693 -----  
EPI\_ISL\_413694 -----  
EPI\_ISL\_414692 -----  
EPI\_ISL\_424359 -----  
EPI\_ISL\_424396 -----  
EPI\_ISL\_424399 -----  
EPI\_ISL\_425530 -----  
EPI\_ISL\_425561 -----  
EPI\_ISL\_425614 -----  
EPI\_ISL\_425635 -----  
EPI\_ISL\_426848 -----  
EPI\_ISL\_426850 -----  
EPI\_ISL\_426955 -----





ORF1ab 6661 MEIDFLELAMDEFIERYKLEGYAFEHIVYGDFSHSQLGGLHLLIGLAKRFKESPFLEDF  
EPI\_ISL\_411066 -----  
EPI\_ISL\_413522 -----  
EPI\_ISL\_413558 -----  
EPI\_ISL\_413559 -----  
EPI\_ISL\_413561 -----  
EPI\_ISL\_413692 -----  
EPI\_ISL\_413693 -----  
EPI\_ISL\_413694 -----  
EPI\_ISL\_414692 -----  
EPI\_ISL\_424359 -----  
EPI\_ISL\_424396 -----  
EPI\_ISL\_424399 -----  
EPI\_ISL\_425530 -----  
EPI\_ISL\_425561 -----  
EPI\_ISL\_425614 -----  
EPI\_ISL\_425635 -----  
EPI\_ISL\_426848 -----  
EPI\_ISL\_426850 -----  
EPI\_ISL\_426955 -----  
EPI\_ISL\_426963 -----

ORF1ab 6721 IPMDSTVKNYFITDAQTGSSKCVCSVIDLLLDFFVEI IKSQDLSVVSQVVKVTIDYTEIS  
EPI\_ISL\_411066 -----  
EPI\_ISL\_413522 -----  
EPI\_ISL\_413558 -----  
EPI\_ISL\_413559 -----  
EPI\_ISL\_413561 -----  
EPI\_ISL\_413692 -----  
EPI\_ISL\_413693 -----  
EPI\_ISL\_413694 -----  
EPI\_ISL\_414692 -----  
EPI\_ISL\_424359 -----  
EPI\_ISL\_424396 -----  
EPI\_ISL\_424399 -----  
EPI\_ISL\_425530 -----  
EPI\_ISL\_425561 -----  
EPI\_ISL\_425614 -----  
EPI\_ISL\_425635 -----  
EPI\_ISL\_426848 -----  
EPI\_ISL\_426850 -----  
EPI\_ISL\_426955 -----  
EPI\_ISL\_426963 -----

ORF1ab 6781 FMLWCKDGHVETFYPKLQSSQAWQPGVAMPNLYKMQRMLLEKCDLQNYGDSATLPGKIMM  
EPI\_ISL\_411066 -----  
EPI\_ISL\_413522 -----  
EPI\_ISL\_413558 -----  
EPI\_ISL\_413559 -----  
EPI\_ISL\_413561 -----  
EPI\_ISL\_413692 -----  
EPI\_ISL\_413693 -----  
EPI\_ISL\_413694 -----  
EPI\_ISL\_414692 -----  
EPI\_ISL\_424359 -----  
EPI\_ISL\_424396 -----  
EPI\_ISL\_424399 -----  
EPI\_ISL\_425530 -----  
EPI\_ISL\_425561 -----  
EPI\_ISL\_425614 -----  
EPI\_ISL\_425635 -----  
EPI\_ISL\_426848 -----  
EPI\_ISL\_426850 -----  
EPI\_ISL\_426955 -----



ORF1ab 6841 NVAKYTQLCQYLNTLTLAVPYNMRVIHFGAGSDKGVAPGTAVLRQWLPTGTLNLDLND  
EPI\_ISL\_411066 -----  
EPI\_ISL\_413522 -----  
EPI\_ISL\_413558 -----  
EPI\_ISL\_413559 -----  
EPI\_ISL\_413561 -----  
EPI\_ISL\_413692 -----  
EPI\_ISL\_413693 -----  
EPI\_ISL\_413694 -----  
EPI\_ISL\_414692 -----  
EPI\_ISL\_424359 -----  
EPI\_ISL\_424396 -----  
EPI\_ISL\_424399 -----  
EPI\_ISL\_425530 -----  
EPI\_ISL\_425561 -----  
EPI\_ISL\_425614 -----  
EPI\_ISL\_425635 -----  
EPI\_ISL\_426848 -----  
EPI\_ISL\_426850 -----  
EPI\_ISL\_426955 -----  
EPI\_ISL\_426963 -----

ORF1ab 6901 FVSDADSTLIGDCATVHTANKWDLIISDMYDPKTKNVTKENDSKEGFFTYICGFIQQKLA  
EPI\_ISL\_411066 -----  
EPI\_ISL\_413522 -----  
EPI\_ISL\_413558 -----  
EPI\_ISL\_413559 -----  
EPI\_ISL\_413561 -----  
EPI\_ISL\_413692 -----  
EPI\_ISL\_413693 -----  
EPI\_ISL\_413694 -----  
EPI\_ISL\_414692 -----  
EPI\_ISL\_424359 -----  
EPI\_ISL\_424396 -----  
EPI\_ISL\_424399 -----  
EPI\_ISL\_425530 -----  
EPI\_ISL\_425561 -----  
EPI\_ISL\_425614 -----  
EPI\_ISL\_425635 -----  
EPI\_ISL\_426848 -----  
EPI\_ISL\_426850 -----  
EPI\_ISL\_426955 -----  
EPI\_ISL\_426963 -----

ORF1ab 6961 LGGSVAIKITEHSWNADLYKLMGHFAWWTAFVTNVNASSEAFILGICNYLGKPREQIDGY  
EPI\_ISL\_411066 -----  
EPI\_ISL\_413522 -----  
EPI\_ISL\_413558 -----  
EPI\_ISL\_413559 -----  
EPI\_ISL\_413561 -----  
EPI\_ISL\_413692 -----  
EPI\_ISL\_413693 -----  
EPI\_ISL\_413694 -----  
EPI\_ISL\_414692 -----  
EPI\_ISL\_424359 -----  
EPI\_ISL\_424396 -----  
EPI\_ISL\_424399 -----  
EPI\_ISL\_425530 -----  
EPI\_ISL\_425561 -----  
EPI\_ISL\_425614 -----  
EPI\_ISL\_425635 -----  
EPI\_ISL\_426848 -----  
EPI\_ISL\_426850 -----  
EPI\_ISL\_426955 -----



ORF1ab 7021 VMHANYIFWRNTNPIQLSSYSLFDMASKFPLKLRGTAVMSLKEGQINDMILSLLSKGRLII  
EPI\_ISL\_411066 -----  
EPI\_ISL\_413522 -----  
EPI\_ISL\_413558 -----  
EPI\_ISL\_413559 -----  
EPI\_ISL\_413561 -----  
EPI\_ISL\_413692 -----  
EPI\_ISL\_413693 -----  
EPI\_ISL\_413694 -----  
EPI\_ISL\_414692 -----  
EPI\_ISL\_424359 -----  
EPI\_ISL\_424396 -----  
EPI\_ISL\_424399 -----  
EPI\_ISL\_425530 -----  
EPI\_ISL\_425561 -----  
EPI\_ISL\_425614 -----  
EPI\_ISL\_425635 -----  
EPI\_ISL\_426848 -----  
EPI\_ISL\_426850 -----  
EPI\_ISL\_426955 -----  
EPI\_ISL\_426963 -----

ORF1ab 7081 RENNRRVVISSDVLVNN  
EPI\_ISL\_411066 -----  
EPI\_ISL\_413522 -----  
EPI\_ISL\_413558 -----  
EPI\_ISL\_413559 -----  
EPI\_ISL\_413561 -----  
EPI\_ISL\_413692 -----  
EPI\_ISL\_413693 -----  
EPI\_ISL\_413694 -----  
EPI\_ISL\_414692 -----  
EPI\_ISL\_424359 -----  
EPI\_ISL\_424396 -----  
EPI\_ISL\_424399 -----  
EPI\_ISL\_425530 -----  
EPI\_ISL\_425561 -----  
EPI\_ISL\_425614 -----  
EPI\_ISL\_425635 -----  
EPI\_ISL\_426848 -----  
EPI\_ISL\_426850 -----  
EPI\_ISL\_426955 -----  
EPI\_ISL\_426963 -----

# Clade 0

ORF1ab 1 MESLVPGFNEKTHVQLSLPVLQVRDVLVRGFGDSVEEVLSERQHLKDGTCGLVEVEKGV  
EPI\_ISL\_413594 1 -----  
EPI\_ISL\_413595 1 -----  
EPI\_ISL\_413596 1 -----  
EPI\_ISL\_413597 1 -----  
EPI\_ISL\_413598 1 -----  
EPI\_ISL\_413599 1 -----  
EPI\_ISL\_413600 1 -----  
EPI\_ISL\_413601 1 -----  
EPI\_ISL\_424217 1 -----  
EPI\_ISL\_424218 1 -----  
EPI\_ISL\_424220 1 -----  
EPI\_ISL\_424232 1 -----  
EPI\_ISL\_424266 1 -----  
EPI\_ISL\_424272 1 -----  
EPI\_ISL\_424283 1 -----  
EPI\_ISL\_424288 1 -----  
EPI\_ISL\_424292 1 -----  
EPI\_ISL\_424295 1 -----  
EPI\_ISL\_426882 1 -----

ORF1ab 61 LPQLEQPYVFIKRSDARTAPHGHVMVELVAELEGIQYGRSGETLGVLVPHVGEIPVAYRK  
EPI\_ISL\_413594 1 -----  
EPI\_ISL\_413595 1 -----  
EPI\_ISL\_413596 1 -----  
EPI\_ISL\_413597 1 -----  
EPI\_ISL\_413598 1 -----  
EPI\_ISL\_413599 1 -----  
EPI\_ISL\_413600 1 -----  
EPI\_ISL\_413601 1 -----  
EPI\_ISL\_424217 1 -----  
EPI\_ISL\_424218 1 -----  
EPI\_ISL\_424220 1 -----  
EPI\_ISL\_424232 1 -----  
EPI\_ISL\_424266 1 -----  
EPI\_ISL\_424272 1 -----  
EPI\_ISL\_424283 1 -----  
EPI\_ISL\_424288 1 -----  
EPI\_ISL\_424292 1 -----  
EPI\_ISL\_424295 1 -----  
EPI\_ISL\_426882 1 -----

ORF1ab 121 VLLRKNNGKNGAGGHSYGADLKSFDLGDDELGTDPYEDFQENWNTKHSSGVTTRELMRELNGG  
EPI\_ISL\_413594 1 -----  
EPI\_ISL\_413595 1 -----  
EPI\_ISL\_413596 1 -----  
EPI\_ISL\_413597 1 -----  
EPI\_ISL\_413598 1 -----  
EPI\_ISL\_413599 1 -----  
EPI\_ISL\_413600 1 -----  
EPI\_ISL\_413601 1 -----  
EPI\_ISL\_424217 1 -----  
EPI\_ISL\_424218 1 -----  
EPI\_ISL\_424220 1 -----  
EPI\_ISL\_424232 1 -----  
EPI\_ISL\_424266 1 -----  
EPI\_ISL\_424272 1 -----  
EPI\_ISL\_424283 1 -----  
EPI\_ISL\_424288 1 -----  
EPI\_ISL\_424292 1 -----

EPI\_ISL\_424295 1 -----  
EPI\_ISL\_426882 1 -----



ORF1ab 181 AYTRYVDNNFCGPDGYPLECIKDLLARAGKASCTLSEQLDFIDTKRGVYCCREHEHEIAW  
EPI\_ISL\_413594 1 -----  
EPI\_ISL\_413595 1 -----  
EPI\_ISL\_413596 1 -----  
EPI\_ISL\_413597 1 -----  
EPI\_ISL\_413598 1 -----  
EPI\_ISL\_413599 1 -----  
EPI\_ISL\_413600 1 -----  
EPI\_ISL\_413601 1 -----  
EPI\_ISL\_424217 1 -----  
EPI\_ISL\_424218 1 -----  
EPI\_ISL\_424220 1 -----  
EPI\_ISL\_424232 1 -----  
EPI\_ISL\_424266 1 -----  
EPI\_ISL\_424272 1 -----  
EPI\_ISL\_424283 1 -----  
EPI\_ISL\_424288 1 -----  
EPI\_ISL\_424292 1 -----  
EPI\_ISL\_424295 1 -----  
EPI\_ISL\_426882 1 -----

ORF1ab 241 YTERSEKSYELQTPFEIKLAKKFDTFNGECPNFVFLNSIIKTIQPRVEKKKLDGFMGRI  
EPI\_ISL\_413594 1 -----  
EPI\_ISL\_413595 1 -----  
EPI\_ISL\_413596 1 -----  
EPI\_ISL\_413597 1 -----  
EPI\_ISL\_413598 1 -----  
EPI\_ISL\_413599 1 -----  
EPI\_ISL\_413600 1 -----  
EPI\_ISL\_413601 1 -----  
EPI\_ISL\_424217 1 -----  
EPI\_ISL\_424218 1 -----  
EPI\_ISL\_424220 1 -----  
EPI\_ISL\_424232 1 -----  
EPI\_ISL\_424266 1 -----  
EPI\_ISL\_424272 1 -----  
EPI\_ISL\_424283 1 -----  
EPI\_ISL\_424288 1 -----  
EPI\_ISL\_424292 1 -----  
EPI\_ISL\_424295 1 -----  
EPI\_ISL\_426882 1 -----

ORF1ab 301 RSVYPVASPNECNQMCLSTLMKCDHCGETSWQTGDFVKATCEFCGTENLTKEGATTCGYL  
EPI\_ISL\_413594 1 -----  
EPI\_ISL\_413595 1 -----  
EPI\_ISL\_413596 1 -----  
EPI\_ISL\_413597 1 -----  
EPI\_ISL\_413598 1 -----  
EPI\_ISL\_413599 1 -----  
EPI\_ISL\_413600 1 -----  
EPI\_ISL\_413601 1 -----  
EPI\_ISL\_424217 1 -----  
EPI\_ISL\_424218 1 -----  
EPI\_ISL\_424220 1 -----  
EPI\_ISL\_424232 1 -----  
EPI\_ISL\_424266 1 -----  
EPI\_ISL\_424272 1 -----  
EPI\_ISL\_424283 1 -----  
EPI\_ISL\_424288 1 -----  
EPI\_ISL\_424292 1 -----  
EPI\_ISL\_424295 1 -----  
EPI\_ISL\_426882 1 -----

ORF1ab 361 PQNAVVKIYCPACHNSEVGPESHSLAEYHNESGLKTIILRKGGRITIAFGGCVFSYVVGCHNKC  
EPI\_ISL\_413594 1 -----  
EPI\_ISL\_413595 1 -----  
EPI\_ISL\_413596 1 -----  
EPI\_ISL\_413597 1 -----  
EPI\_ISL\_413598 1 -----  
EPI\_ISL\_413599 1 -----  
EPI\_ISL\_413600 1 -----  
EPI\_ISL\_413601 1 -----  
EPI\_ISL\_424217 1 -----  
EPI\_ISL\_424218 1 -----  
EPI\_ISL\_424220 1 -----  
EPI\_ISL\_424232 1 -----  
EPI\_ISL\_424266 1 -----  
EPI\_ISL\_424272 1 -----  
EPI\_ISL\_424283 1 -----  
EPI\_ISL\_424288 1 -----  
EPI\_ISL\_424292 1 -----  
EPI\_ISL\_424295 1 -----  
EPI\_ISL\_426882 1 -----

ORF1ab 421 AYWVPRASANIGCNHTGVVGESEGLNDNLLEILQKEKVNINIVGDFKLNEEIATILASF  
EPI\_ISL\_413594 1 -----  
EPI\_ISL\_413595 1 -----  
EPI\_ISL\_413596 1 -----  
EPI\_ISL\_413597 1 -----  
EPI\_ISL\_413598 1 -----  
EPI\_ISL\_413599 1 -----  
EPI\_ISL\_413600 1 -----  
EPI\_ISL\_413601 1 -----  
EPI\_ISL\_424217 1 -----  
EPI\_ISL\_424218 1 -----  
EPI\_ISL\_424220 1 -----  
EPI\_ISL\_424232 1 -----  
EPI\_ISL\_424266 1 -----  
EPI\_ISL\_424272 1 -----  
EPI\_ISL\_424283 1 -----  
EPI\_ISL\_424288 1 -----  
EPI\_ISL\_424292 1 -----  
EPI\_ISL\_424295 1 -----  
EPI\_ISL\_426882 1 -----

ORF1ab 481 SASTSAFVETVKGLDYKAFKQIVESCNGFKVTKGKAKKGAWNIGEQKSILSPLYAFASEA  
EPI\_ISL\_413594 1 -----  
EPI\_ISL\_413595 1 -----  
EPI\_ISL\_413596 1 -----  
EPI\_ISL\_413597 1 -----  
EPI\_ISL\_413598 1 -----  
EPI\_ISL\_413599 1 -----  
EPI\_ISL\_413600 1 -----  
EPI\_ISL\_413601 1 -----  
EPI\_ISL\_424217 1 -----  
EPI\_ISL\_424218 1 -----  
EPI\_ISL\_424220 1 -----  
EPI\_ISL\_424232 1 -----  
EPI\_ISL\_424266 1 -----  
EPI\_ISL\_424272 1 -----  
EPI\_ISL\_424283 1 -----  
EPI\_ISL\_424288 1 -----  
EPI\_ISL\_424292 1 -----  
EPI\_ISL\_424295 1 -----  
EPI\_ISL\_426882 1 -----

ORF1ab 541 ARVVRSIFSRTLETAQNSVRVLQKAAITILDGISQYSLRLIDAMMFTSDLATNNLVVMAY  
EPI\_ISL\_413594 1 -----  
EPI\_ISL\_413595 1 -----  
EPI\_ISL\_413596 1 -----  
EPI\_ISL\_413597 1 -----  
EPI\_ISL\_413598 1 -----  
EPI\_ISL\_413599 1 -----  
EPI\_ISL\_413600 1 -----  
EPI\_ISL\_413601 1 -----  
EPI\_ISL\_424217 1 -----  
EPI\_ISL\_424218 1 -----  
EPI\_ISL\_424220 1 -----  
EPI\_ISL\_424232 1 -----  
EPI\_ISL\_424266 1 -----  
EPI\_ISL\_424272 1 -----  
EPI\_ISL\_424283 1 -----  
EPI\_ISL\_424288 1 -----  
EPI\_ISL\_424292 1 -----  
EPI\_ISL\_424295 1 -----  
EPI\_ISL\_426882 1 -----

ORF1ab 601 ITGGVVQLTSQWL TNIFGTVYEK LKPVL DWLEEK FKEGVE FLRDGWEIVK FISTCACEIV  
EPI\_ISL\_413594 1 -----  
EPI\_ISL\_413595 1 -----  
EPI\_ISL\_413596 1 -----  
EPI\_ISL\_413597 1 -----  
EPI\_ISL\_413598 1 -----  
EPI\_ISL\_413599 1 -----  
EPI\_ISL\_413600 1 -----  
EPI\_ISL\_413601 1 -----  
EPI\_ISL\_424217 1 -----  
EPI\_ISL\_424218 1 -----  
EPI\_ISL\_424220 1 -----  
EPI\_ISL\_424232 1 -----  
EPI\_ISL\_424266 1 -----  
EPI\_ISL\_424272 1 -----  
EPI\_ISL\_424283 1 -----  
EPI\_ISL\_424288 1 -----  
EPI\_ISL\_424292 1 -----  
EPI\_ISL\_424295 1 -----  
EPI\_ISL\_426882 1 -----

ORF1ab 661 GGQIVTCAKEIKESVQTF FKL VNKFLALCADSIIIGGAKLKALNLGETFVTHSKGLYRKC  
EPI\_ISL\_413594 1 -----  
EPI\_ISL\_413595 1 -----  
EPI\_ISL\_413596 1 -----  
EPI\_ISL\_413597 1 -----  
EPI\_ISL\_413598 1 -----  
EPI\_ISL\_413599 1 -----  
EPI\_ISL\_413600 1 -----  
EPI\_ISL\_413601 1 -----  
EPI\_ISL\_424217 1 -----  
EPI\_ISL\_424218 1 -----  
EPI\_ISL\_424220 1 -----  
EPI\_ISL\_424232 1 -----  
EPI\_ISL\_424266 1 -----  
EPI\_ISL\_424272 1 -----  
EPI\_ISL\_424283 1 -----  
EPI\_ISL\_424288 1 -----  
EPI\_ISL\_424292 1 -----  
EPI\_ISL\_424295 1 -----  
EPI\_ISL\_426882 1 -----

ORF1ab 721 VKSREETGLMLPLKAPKEIIFLEGETLPTEVLTEEVVLKTGDLQPLEQPTSEAVEAPLVG  
EPI\_ISL\_413594 1 -----  
EPI\_ISL\_413595 1 -----  
EPI\_ISL\_413596 1 -----  
EPI\_ISL\_413597 1 -----  
EPI\_ISL\_413598 1 -----  
EPI\_ISL\_413599 1 -----  
EPI\_ISL\_413600 1 -----  
EPI\_ISL\_413601 1 -----  
EPI\_ISL\_424217 1 -----  
EPI\_ISL\_424218 1 -----  
EPI\_ISL\_424220 1 -----  
EPI\_ISL\_424232 1 -----  
EPI\_ISL\_424266 1 -----  
EPI\_ISL\_424272 1 -----  
EPI\_ISL\_424283 1 -----  
EPI\_ISL\_424288 1 -----  
EPI\_ISL\_424292 1 -----  
EPI\_ISL\_424295 1 -----  
EPI\_ISL\_426882 1 -----

ORF1ab 781 TPVCIINGLMLLEIKDTEKYCALAPNMMVTNNTFTLKGGAPTKVTFGDDTVIEVQGYKSVN  
EPI\_ISL\_413594 1 -----APTKVTFGDDTVIEVQGYKSVN  
EPI\_ISL\_413595 1 -----APTKVTFGDDTVIEVQGYKSVN  
EPI\_ISL\_413596 1 -----APTKVTFGDDTVIEVQGYKSVN  
EPI\_ISL\_413597 1 -----APTKVTFGDDTVIEVQGYKSVN  
EPI\_ISL\_413598 1 -----APTKVTFGDDTVIEVQGYKSVN  
EPI\_ISL\_413599 1 -----APTKVTFGDDTVIEVQGYKSVN  
EPI\_ISL\_413600 1 -----APTKVTFGDDTVIEVQGYKSVN  
EPI\_ISL\_413601 1 -----APTKVTFGDDTVIEVQGYKSVN  
EPI\_ISL\_424217 1 -----APTKVTFGDDTVIEVQGYKSVN  
EPI\_ISL\_424218 1 -----APTKVTFGDDTVIEVQGYKSVN  
EPI\_ISL\_424220 1 -----APTKVTFGDDTVIEVQGYKSVN  
EPI\_ISL\_424232 1 -----APTKVTFGDDTVIEVQGYKSVN  
EPI\_ISL\_424266 1 -----APTKVTFGDDTVIEVQGYKSVN  
EPI\_ISL\_424272 1 -----APTKVTFGDDTVIEVQGYKSVN  
EPI\_ISL\_424283 1 -----APTKVTFGDDTVIEVQGYKSVN  
EPI\_ISL\_424288 1 -----APTKVTFGDDTVIEVQGYKSVN  
EPI\_ISL\_424292 1 -----APTKVTFGDDTVIEVQGYKSVN  
EPI\_ISL\_424295 1 -----APTKVTFGDDTVIEVQGYKSVN  
EPI\_ISL\_426882 1 -----APTKVTFGDDTVIEVQGYKSVN

ORF1ab 841 ITFELDERIDKVLNEKCSAYTVELGTEVNEFACVVADAVIKTLQPVSELLTPLGIDLDEW  
EPI\_ISL\_413594 23 ITFELDERIDKVLNEKCSAYTVELGTEVNEFACVVADAVIKTLQPVSELLTPLGIDLDEW  
EPI\_ISL\_413595 23 ITFELDERIDKVLNEKCSAYTVELGTEVNEFACVVADAVIKTLQPVSELLTPLGIDLDEW  
EPI\_ISL\_413596 23 ITFELDERIDKVLNEKCSAYTVELGTEVNEFACVVADAVIKTLQPVSELLTPLGIDLDEW  
EPI\_ISL\_413597 23 ITFELDERIDKVLNEKCSAYTVELGTEVNEFACVVADAVIKTLQPVSELLTPLGIDLDEW  
EPI\_ISL\_413598 23 ITFELDERIDKVLNEKCSAYTVELGTEVNEFACVVADAVIKTLQPVSELLTPLGIDLDEW  
EPI\_ISL\_413599 23 ITFELDERIDKVLNEKCSAYTVELGTEVNEFACVVADAVIKTLQPVSELLTPLGIDLDEW  
EPI\_ISL\_413600 23 ITFELDERIDKVLNEKCSAYTVELGTEVNEFACVVADAVIKTLQPVSELLTPLGIDLDEW  
EPI\_ISL\_413601 23 ITFELDERIDKVLNEKCSAYTVELGTEVNEFACVVADAVIKTLQPVSELLTPLGIDLDEW  
EPI\_ISL\_424217 23 ITFELDERIDKVLNEKCSAYTVELGTEVNEFACVVADAVIKTLQPVSELLTPLGIDLDEW  
EPI\_ISL\_424218 23 ITFELDERIDKVLNEKCSAYTVELGTEVNEFACVVADAVIKTLQPVSELLTPLGIDLDEW  
EPI\_ISL\_424220 23 ITFELDERIDKVLNEKCSAYTVELGTEVNEFACVVADAVIKTLQPVSELLTPLGIDLDEW  
EPI\_ISL\_424232 23 ITFELDERIDKVLNEKCSAYTVELGTEVNEFACVVADAVIKTLQPVSELLTPLGIDLDEW  
EPI\_ISL\_424266 23 ITFELDERIDKVLNEKCSAYTVELGTEVNEFACVVADAVIKTLQPVSELLTPLGIDLDEW  
EPI\_ISL\_424272 23 ITFELDERIDKVLNEKCSAYTVELGTEVNEFACVVADAVIKTLQPVSELLTPLGIDLDEW  
EPI\_ISL\_424283 23 ITFELDERIDKVLNEKCSAYTVELGTEVNEFACVVADAVIKTLQPVSELLTPLGIDLDEW  
EPI\_ISL\_424288 23 ITFELDERIDKVLNEKCSAYTVELGTEVNEFACVVADAVIKTLQPVSELLTPLGIDLDEW  
EPI\_ISL\_424292 23 ITFELDERIDKVLNEKCSAYTVELGTEVNEFACVVADAVIKTLQPVSELLTPLGIDLDEW  
EPI\_ISL\_424295 23 ITFELDERIDKVLNEKCSAYTVELGTEVNEFACVVADAVIKTLQPVSELLTPLGIDLDEW  
EPI\_ISL\_426882 23 ITFELDERIDKVLNEKCSAYTVELGTEVNEFACVVADAVIKTLQPVSELLTPLGIDLDEW























|                |      |                                                              |
|----------------|------|--------------------------------------------------------------|
| ORF1ab         | 2701 | AQVAKSHNIALIWNVKDFMSLSEQLRKQIRSAAKKNNLPFKLTCATTRQVVNVVTTKIAL |
| EPI_ISL_413594 | 1883 | AQVAKSHNIALIWNVKDFMSLSEQLRKQIRSAAKKNNLPFKLTCATTRQVVNVVTTKIAL |
| EPI_ISL_413595 | 1883 | AQVAKSHNIALIWNVKDFMSLSEQLRKQIRSAAKKNNLPFKLTCATTRQVVNVVTTKIAL |
| EPI_ISL_413596 | 1883 | AQVAKSHNIALIWNVKDFMSLSEQLRKQIRSAAKKNNLPFKLTCATTRQVVNVVTTKIAL |
| EPI_ISL_413597 | 1883 | AQVAKSHNIALIWNVKDFMSLSEQLRKQIRSAAKKNNLPFKLTCATTRQVVNVVTTKIAL |
| EPI_ISL_413598 | 1883 | AQVAKSHNIALIWNVKDFMSLSEQLRKQIRSAAKKNNLPFKLTCATTRQVVNVVTTKIAL |
| EPI_ISL_413599 | 1883 | AQVAKSHNIALIWNVKDFMSLSEQLRKQIRSAAKKNNLPFKLTCATTRQVVNVVTTKIAL |
| EPI_ISL_413600 | 1883 | AQVAKSHNIALIWNVKDFMSLSEQLRKQIRSAAKKNNLPFKLTCATTRQVVNVVTTKIAL |
| EPI_ISL_413601 | 1883 | AQVAKSHNIALIWNVKDFMSLSEQLRKQIRSAAKKNNLPFKLTCATTRQVVNVVTTKIAL |
| EPI_ISL_424217 | 1883 | AQVAKSHNIALIWNVKDFMSLSEQLRKQIRSAAKKNNLPFKLTCATTRQVVNVVTTKIAL |
| EPI_ISL_424218 | 1883 | AQVAKSHNIALIWNVKDFMSLSEQLRKQIRSAAKKNNLPFKLTCATTRQVVNVVTTKIAL |
| EPI_ISL_424220 | 1883 | AQVAKSHNIALIWNVKDFMSLSEQLRKQIRSAAKKNNLPFKLTCATTRQVVNVVTTKIAL |
| EPI_ISL_424232 | 1883 | AQVAKSHNIALIWNVKDFMSLSEQLRKQIRSAAKKNNLPFKLTCATTRQVVNVVTTKIAL |
| EPI_ISL_424266 | 1883 | AQVAKSHNIALIWNVKDFMSLSEQLRKQIRSAAKKNNLPFKLTCATTRQVVNVVTTKIAL |
| EPI_ISL_424272 | 1883 | AQVAKSHNIALIWNVKDFMSLSEQLRKQIRSAAKKNNLPFKLTCATTRQVVNVVTTKIAL |
| EPI_ISL_424283 | 1883 | AQVAKSHNIALIWNVKDFMSLSEQLRKQIRSAAKKNNLPFKLTCATTRQVVNVVTTKIAL |
| EPI_ISL_424288 | 1883 | AQVAKSHNIALIWNVKDFMSLSEQLRKQIRSAAKKNNLPFKLTCATTRQVVNVVTTKIAL |
| EPI_ISL_424292 | 1883 | AQVAKSHNIALIWNVKDFMSLSEQLRKQIRSAAKKNNLPFKLTCATTRQVVNVVTTKIAL |
| EPI_ISL_424295 | 1883 | AQVAKSHNIALIWNVKDFMSLSEQLRKQIRSAAKKNNLPFKLTCATTRQVVNVVTTKIAL |
| EPI_ISL_426882 | 1883 | AQVAKSHNIALIWNVKDFMSLSEQLRKQIRSAAKKNNLPFKLTCATTRQVVNVVTTKIAL |

|                |      |                                                             |
|----------------|------|-------------------------------------------------------------|
| ORF1ab         | 2761 | KGGKIVNNWLKQLIKVTLVFLFVAAIFYLITPVHVMKHTDFSSEIIGYKAIDGGVTRDI |
| EPI_ISL_413594 | 1943 | KGG-----                                                    |
| EPI_ISL_413595 | 1943 | KGG-----                                                    |
| EPI_ISL_413596 | 1943 | KGG-----                                                    |
| EPI_ISL_413597 | 1943 | KGG-----                                                    |
| EPI_ISL_413598 | 1943 | KGG-----                                                    |
| EPI_ISL_413599 | 1943 | KGG-----                                                    |
| EPI_ISL_413600 | 1943 | KGG-----                                                    |
| EPI_ISL_413601 | 1943 | KGG-----                                                    |
| EPI_ISL_424217 | 1943 | KGG-----                                                    |
| EPI_ISL_424218 | 1943 | KGG-----                                                    |
| EPI_ISL_424220 | 1943 | KGG-----                                                    |
| EPI_ISL_424232 | 1943 | KGG-----                                                    |
| EPI_ISL_424266 | 1943 | KGG-----                                                    |
| EPI_ISL_424272 | 1943 | KGG-----                                                    |
| EPI_ISL_424283 | 1943 | KGG-----                                                    |
| EPI_ISL_424288 | 1943 | KGG-----                                                    |
| EPI_ISL_424292 | 1943 | KGG-----                                                    |
| EPI_ISL_424295 | 1943 | KGG-----                                                    |
| EPI_ISL_426882 | 1943 | KGG-----                                                    |

|                |      |                                                               |
|----------------|------|---------------------------------------------------------------|
| ORF1ab         | 2821 | ASTDTCFANKHADFDTWFSQRGGSYTNDKACPLIAAVITREVGFFVVPGLPGTILRTTNGD |
| EPI_ISL_413594 |      | -----                                                         |
| EPI_ISL_413595 |      | -----                                                         |
| EPI_ISL_413596 |      | -----                                                         |
| EPI_ISL_413597 |      | -----                                                         |
| EPI_ISL_413598 |      | -----                                                         |
| EPI_ISL_413599 |      | -----                                                         |
| EPI_ISL_413600 |      | -----                                                         |
| EPI_ISL_413601 |      | -----                                                         |
| EPI_ISL_424217 |      | -----                                                         |
| EPI_ISL_424218 |      | -----                                                         |
| EPI_ISL_424220 |      | -----                                                         |
| EPI_ISL_424232 |      | -----                                                         |
| EPI_ISL_424266 |      | -----                                                         |
| EPI_ISL_424272 |      | -----                                                         |
| EPI_ISL_424283 |      | -----                                                         |
| EPI_ISL_424288 |      | -----                                                         |
| EPI_ISL_424292 |      | -----                                                         |
| EPI_ISL_424295 |      | -----                                                         |
| EPI_ISL_426882 |      | -----                                                         |

ORF1ab 2881 FLHFLPRVFSAVGNICYTPSKLIEYTDGFATSACVLA AECTIFK DASGKPVPCYD TNVLE  
EPI\_ISL\_413594 -----  
EPI\_ISL\_413595 -----  
EPI\_ISL\_413596 -----  
EPI\_ISL\_413597 -----  
EPI\_ISL\_413598 -----  
EPI\_ISL\_413599 -----  
EPI\_ISL\_413600 -----  
EPI\_ISL\_413601 -----  
EPI\_ISL\_424217 -----  
EPI\_ISL\_424218 -----  
EPI\_ISL\_424220 -----  
EPI\_ISL\_424232 -----  
EPI\_ISL\_424266 -----  
EPI\_ISL\_424272 -----  
EPI\_ISL\_424283 -----  
EPI\_ISL\_424288 -----  
EPI\_ISL\_424292 -----  
EPI\_ISL\_424295 -----  
EPI\_ISL\_426882 -----

ORF1ab 2941 GSVAYESLRPDTRYV LMDGSI IQFPNTYLEG SVRVVTTFDSEYCRHGT CERSEAGVCVST  
EPI\_ISL\_413594 -----  
EPI\_ISL\_413595 -----  
EPI\_ISL\_413596 -----  
EPI\_ISL\_413597 -----  
EPI\_ISL\_413598 -----  
EPI\_ISL\_413599 -----  
EPI\_ISL\_413600 -----  
EPI\_ISL\_413601 -----  
EPI\_ISL\_424217 -----  
EPI\_ISL\_424218 -----  
EPI\_ISL\_424220 -----  
EPI\_ISL\_424232 -----  
EPI\_ISL\_424266 -----  
EPI\_ISL\_424272 -----  
EPI\_ISL\_424283 -----  
EPI\_ISL\_424288 -----  
EPI\_ISL\_424292 -----  
EPI\_ISL\_424295 -----  
EPI\_ISL\_426882 -----

ORF1ab 3001 SGRWVLNNDYRSLPGVFCGVDAVNLLTNMFTPLIQPIGALDISASIVAGGIVAI VVTCL  
EPI\_ISL\_413594 -----  
EPI\_ISL\_413595 -----  
EPI\_ISL\_413596 -----  
EPI\_ISL\_413597 -----  
EPI\_ISL\_413598 -----  
EPI\_ISL\_413599 -----  
EPI\_ISL\_413600 -----  
EPI\_ISL\_413601 -----  
EPI\_ISL\_424217 -----  
EPI\_ISL\_424218 -----  
EPI\_ISL\_424220 -----  
EPI\_ISL\_424232 -----  
EPI\_ISL\_424266 -----  
EPI\_ISL\_424272 -----  
EPI\_ISL\_424283 -----  
EPI\_ISL\_424288 -----  
EPI\_ISL\_424292 -----  
EPI\_ISL\_424295 -----  
EPI\_ISL\_426882 -----



ORF1ab 3061 AYYFMRFRRAFGEYSHVVAFNLLFLMSFTVLCLTPVYSFLPGVYSVIYLYLTFYLTNDV  
EPI\_ISL\_413594 -----  
EPI\_ISL\_413595 -----  
EPI\_ISL\_413596 -----  
EPI\_ISL\_413597 -----  
EPI\_ISL\_413598 -----  
EPI\_ISL\_413599 -----  
EPI\_ISL\_413600 -----  
EPI\_ISL\_413601 -----  
EPI\_ISL\_424217 -----  
EPI\_ISL\_424218 -----  
EPI\_ISL\_424220 -----  
EPI\_ISL\_424232 -----  
EPI\_ISL\_424266 -----  
EPI\_ISL\_424272 -----  
EPI\_ISL\_424283 -----  
EPI\_ISL\_424288 -----  
EPI\_ISL\_424292 -----  
EPI\_ISL\_424295 -----  
EPI\_ISL\_426882 -----

ORF1ab 3121 SFLAHIQWMVMFTPLVPFWITIAIYIICISTKHFYWFFSNYLKRRVVFNGVSFSTFEEAAL  
EPI\_ISL\_413594 -----  
EPI\_ISL\_413595 -----  
EPI\_ISL\_413596 -----  
EPI\_ISL\_413597 -----  
EPI\_ISL\_413598 -----  
EPI\_ISL\_413599 -----  
EPI\_ISL\_413600 -----  
EPI\_ISL\_413601 -----  
EPI\_ISL\_424217 -----  
EPI\_ISL\_424218 -----  
EPI\_ISL\_424220 -----  
EPI\_ISL\_424232 -----  
EPI\_ISL\_424266 -----  
EPI\_ISL\_424272 -----  
EPI\_ISL\_424283 -----  
EPI\_ISL\_424288 -----  
EPI\_ISL\_424292 -----  
EPI\_ISL\_424295 -----  
EPI\_ISL\_426882 -----

ORF1ab 3181 CTFLLNKEMYLKLRSDVLLPLTQYNRYLALYNKYKYFSGAMDTTSYREAACCHLAKALND  
EPI\_ISL\_413594 -----  
EPI\_ISL\_413595 -----  
EPI\_ISL\_413596 -----  
EPI\_ISL\_413597 -----  
EPI\_ISL\_413598 -----  
EPI\_ISL\_413599 -----  
EPI\_ISL\_413600 -----  
EPI\_ISL\_413601 -----  
EPI\_ISL\_424217 -----  
EPI\_ISL\_424218 -----  
EPI\_ISL\_424220 -----  
EPI\_ISL\_424232 -----  
EPI\_ISL\_424266 -----  
EPI\_ISL\_424272 -----  
EPI\_ISL\_424283 -----  
EPI\_ISL\_424288 -----  
EPI\_ISL\_424292 -----  
EPI\_ISL\_424295 -----  
EPI\_ISL\_426882 -----

ORF1ab 3241 FSNSGSDVLYQPPQTSITSAVLQSGFRKMAFPSGKVEGCMVQVTCGTTTTLNLGLWLDVVY  
EPI\_ISL\_413594 -----  
EPI\_ISL\_413595 -----  
EPI\_ISL\_413596 -----  
EPI\_ISL\_413597 -----  
EPI\_ISL\_413598 -----  
EPI\_ISL\_413599 -----  
EPI\_ISL\_413600 -----  
EPI\_ISL\_413601 -----  
EPI\_ISL\_424217 -----  
EPI\_ISL\_424218 -----  
EPI\_ISL\_424220 -----  
EPI\_ISL\_424232 -----  
EPI\_ISL\_424266 -----  
EPI\_ISL\_424272 -----  
EPI\_ISL\_424283 -----  
EPI\_ISL\_424288 -----  
EPI\_ISL\_424292 -----  
EPI\_ISL\_424295 -----  
EPI\_ISL\_426882 -----

ORF1ab 3301 CPRHVICTSEDMLNPNYEDLLIRKSNHNFLVQAGNVQLRVIGHSMQNCVLKLVDTANPK  
EPI\_ISL\_413594 -----  
EPI\_ISL\_413595 -----  
EPI\_ISL\_413596 -----  
EPI\_ISL\_413597 -----  
EPI\_ISL\_413598 -----  
EPI\_ISL\_413599 -----  
EPI\_ISL\_413600 -----  
EPI\_ISL\_413601 -----  
EPI\_ISL\_424217 -----  
EPI\_ISL\_424218 -----  
EPI\_ISL\_424220 -----  
EPI\_ISL\_424232 -----  
EPI\_ISL\_424266 -----  
EPI\_ISL\_424272 -----  
EPI\_ISL\_424283 -----  
EPI\_ISL\_424288 -----  
EPI\_ISL\_424292 -----  
EPI\_ISL\_424295 -----  
EPI\_ISL\_426882 -----

ORF1ab 3361 TPKYKFVRIQPGQTF SVLACYNGSPSGVYQCAMRPNFTIKGSFLNGSCGSVGFNIDYDCV  
EPI\_ISL\_413594 -----  
EPI\_ISL\_413595 -----  
EPI\_ISL\_413596 -----  
EPI\_ISL\_413597 -----  
EPI\_ISL\_413598 -----  
EPI\_ISL\_413599 -----  
EPI\_ISL\_413600 -----  
EPI\_ISL\_413601 -----  
EPI\_ISL\_424217 -----  
EPI\_ISL\_424218 -----  
EPI\_ISL\_424220 -----  
EPI\_ISL\_424232 -----  
EPI\_ISL\_424266 -----  
EPI\_ISL\_424272 -----  
EPI\_ISL\_424283 -----  
EPI\_ISL\_424288 -----  
EPI\_ISL\_424292 -----  
EPI\_ISL\_424295 -----  
EPI\_ISL\_426882 -----

ORF1ab 3421 SFCYMHHMELPTGVHAGTDLEGNFYGPVDRQTAQAAGTDTTITVNVLAWLYAAVINGDR  
EPI\_ISL\_413594 -----  
EPI\_ISL\_413595 -----  
EPI\_ISL\_413596 -----  
EPI\_ISL\_413597 -----  
EPI\_ISL\_413598 -----  
EPI\_ISL\_413599 -----  
EPI\_ISL\_413600 -----  
EPI\_ISL\_413601 -----  
EPI\_ISL\_424217 -----  
EPI\_ISL\_424218 -----  
EPI\_ISL\_424220 -----  
EPI\_ISL\_424232 -----  
EPI\_ISL\_424266 -----  
EPI\_ISL\_424272 -----  
EPI\_ISL\_424283 -----  
EPI\_ISL\_424288 -----  
EPI\_ISL\_424292 -----  
EPI\_ISL\_424295 -----  
EPI\_ISL\_426882 -----

ORF1ab 3481 WFLNRFTTTLNDFNLVAMKYNYPLEPTQDHVDILGPLSAQTGIAVLDMCASLKELLQNGMN  
EPI\_ISL\_413594 -----  
EPI\_ISL\_413595 -----  
EPI\_ISL\_413596 -----  
EPI\_ISL\_413597 -----  
EPI\_ISL\_413598 -----  
EPI\_ISL\_413599 -----  
EPI\_ISL\_413600 -----  
EPI\_ISL\_413601 -----  
EPI\_ISL\_424217 -----  
EPI\_ISL\_424218 -----  
EPI\_ISL\_424220 -----  
EPI\_ISL\_424232 -----  
EPI\_ISL\_424266 -----  
EPI\_ISL\_424272 -----  
EPI\_ISL\_424283 -----  
EPI\_ISL\_424288 -----  
EPI\_ISL\_424292 -----  
EPI\_ISL\_424295 -----  
EPI\_ISL\_426882 -----

ORF1ab 3541 GRTILGSALLEDEFTPFQSVRQCSGVTQSAVKRTIKGTHHWLLLLTILTSLLVLVQSTQW  
EPI\_ISL\_413594 -----  
EPI\_ISL\_413595 -----  
EPI\_ISL\_413596 -----  
EPI\_ISL\_413597 -----  
EPI\_ISL\_413598 -----  
EPI\_ISL\_413599 -----  
EPI\_ISL\_413600 -----  
EPI\_ISL\_413601 -----  
EPI\_ISL\_424217 -----  
EPI\_ISL\_424218 -----  
EPI\_ISL\_424220 -----  
EPI\_ISL\_424232 -----  
EPI\_ISL\_424266 -----  
EPI\_ISL\_424272 -----  
EPI\_ISL\_424283 -----  
EPI\_ISL\_424288 -----  
EPI\_ISL\_424292 -----  
EPI\_ISL\_424295 -----  
EPI\_ISL\_426882 -----

ORF1ab 3601 SLFFFLYENAFPLPFAMGIIAMSAFAMMFVKHKHAFCLCLFLLPSSLATVAYFNMVYMPASWV  
EPI\_ISL\_413594 -----  
EPI\_ISL\_413595 -----  
EPI\_ISL\_413596 -----  
EPI\_ISL\_413597 -----  
EPI\_ISL\_413598 -----  
EPI\_ISL\_413599 -----  
EPI\_ISL\_413600 -----  
EPI\_ISL\_413601 -----  
EPI\_ISL\_424217 -----  
EPI\_ISL\_424218 -----  
EPI\_ISL\_424220 -----  
EPI\_ISL\_424232 -----  
EPI\_ISL\_424266 -----  
EPI\_ISL\_424272 -----  
EPI\_ISL\_424283 -----  
EPI\_ISL\_424288 -----  
EPI\_ISL\_424292 -----  
EPI\_ISL\_424295 -----  
EPI\_ISL\_426882 -----

ORF1ab 3661 MRIMTWLDMVDTSLSGFKLKDCVMYASAVVLLILMTARTVYDDGARRVWTLMNVLTLVYK  
EPI\_ISL\_413594 -----  
EPI\_ISL\_413595 -----  
EPI\_ISL\_413596 -----  
EPI\_ISL\_413597 -----  
EPI\_ISL\_413598 -----  
EPI\_ISL\_413599 -----  
EPI\_ISL\_413600 -----  
EPI\_ISL\_413601 -----  
EPI\_ISL\_424217 -----  
EPI\_ISL\_424218 -----  
EPI\_ISL\_424220 -----  
EPI\_ISL\_424232 -----  
EPI\_ISL\_424266 -----  
EPI\_ISL\_424272 -----  
EPI\_ISL\_424283 -----  
EPI\_ISL\_424288 -----  
EPI\_ISL\_424292 -----  
EPI\_ISL\_424295 -----  
EPI\_ISL\_426882 -----

ORF1ab 3721 VYYGNALDQAISMWALIIISVTSNYSQVVTVMFLARGIVFMCVEYCPITFITGNTLQCM  
EPI\_ISL\_413594 -----  
EPI\_ISL\_413595 -----  
EPI\_ISL\_413596 -----  
EPI\_ISL\_413597 -----  
EPI\_ISL\_413598 -----  
EPI\_ISL\_413599 -----  
EPI\_ISL\_413600 -----  
EPI\_ISL\_413601 -----  
EPI\_ISL\_424217 -----  
EPI\_ISL\_424218 -----  
EPI\_ISL\_424220 -----  
EPI\_ISL\_424232 -----  
EPI\_ISL\_424266 -----  
EPI\_ISL\_424272 -----  
EPI\_ISL\_424283 -----  
EPI\_ISL\_424288 -----  
EPI\_ISL\_424292 -----  
EPI\_ISL\_424295 -----  
EPI\_ISL\_426882 -----

ORF1ab 3781 LVYCFLGYFCTCYFGLFCLLNRYFRLTLGVYDYLSTQEFRYMNSQGLLPPKNSIDAFKL  
EPI\_ISL\_413594 -----  
EPI\_ISL\_413595 -----  
EPI\_ISL\_413596 -----  
EPI\_ISL\_413597 -----  
EPI\_ISL\_413598 -----  
EPI\_ISL\_413599 -----  
EPI\_ISL\_413600 -----  
EPI\_ISL\_413601 -----  
EPI\_ISL\_424217 -----  
EPI\_ISL\_424218 -----  
EPI\_ISL\_424220 -----  
EPI\_ISL\_424232 -----  
EPI\_ISL\_424266 -----  
EPI\_ISL\_424272 -----  
EPI\_ISL\_424283 -----  
EPI\_ISL\_424288 -----  
EPI\_ISL\_424292 -----  
EPI\_ISL\_424295 -----  
EPI\_ISL\_426882 -----

ORF1ab 3841 NIKLLGVGGKPCIKVATVQSKMSDVKCTSVVLLSVLQQLRVESSKSLWAQCVQLHNDILL  
EPI\_ISL\_413594 -----  
EPI\_ISL\_413595 -----  
EPI\_ISL\_413596 -----  
EPI\_ISL\_413597 -----  
EPI\_ISL\_413598 -----  
EPI\_ISL\_413599 -----  
EPI\_ISL\_413600 -----  
EPI\_ISL\_413601 -----  
EPI\_ISL\_424217 -----  
EPI\_ISL\_424218 -----  
EPI\_ISL\_424220 -----  
EPI\_ISL\_424232 -----  
EPI\_ISL\_424266 -----  
EPI\_ISL\_424272 -----  
EPI\_ISL\_424283 -----  
EPI\_ISL\_424288 -----  
EPI\_ISL\_424292 -----  
EPI\_ISL\_424295 -----  
EPI\_ISL\_426882 -----

ORF1ab 3901 AKDTTEAFEKMSVLLSVLLSMQGAVDINKLCEEMLDNRATLQAIASEFSSLPSYAAFATA  
EPI\_ISL\_413594 -----  
EPI\_ISL\_413595 -----  
EPI\_ISL\_413596 -----  
EPI\_ISL\_413597 -----  
EPI\_ISL\_413598 -----  
EPI\_ISL\_413599 -----  
EPI\_ISL\_413600 -----  
EPI\_ISL\_413601 -----  
EPI\_ISL\_424217 -----  
EPI\_ISL\_424218 -----  
EPI\_ISL\_424220 -----  
EPI\_ISL\_424232 -----  
EPI\_ISL\_424266 -----  
EPI\_ISL\_424272 -----  
EPI\_ISL\_424283 -----  
EPI\_ISL\_424288 -----  
EPI\_ISL\_424292 -----  
EPI\_ISL\_424295 -----  
EPI\_ISL\_426882 -----

ORF1ab 3961 QEAYEQAVANGDSEVVLKLLKSLNVAKSEFDRDAAMQRKLEKMDAQAMTQMYKQARSED  
EPI\_ISL\_413594 -----  
EPI\_ISL\_413595 -----  
EPI\_ISL\_413596 -----  
EPI\_ISL\_413597 -----  
EPI\_ISL\_413598 -----  
EPI\_ISL\_413599 -----  
EPI\_ISL\_413600 -----  
EPI\_ISL\_413601 -----  
EPI\_ISL\_424217 -----  
EPI\_ISL\_424218 -----  
EPI\_ISL\_424220 -----  
EPI\_ISL\_424232 -----  
EPI\_ISL\_424266 -----  
EPI\_ISL\_424272 -----  
EPI\_ISL\_424283 -----  
EPI\_ISL\_424288 -----  
EPI\_ISL\_424292 -----  
EPI\_ISL\_424295 -----  
EPI\_ISL\_426882 -----

ORF1ab 4021 KRAKVTSAMQTMLFTMLRKLNDALNNIINNARDGCVPLNIIPLTTAAKLMVVIIPDYNTY  
EPI\_ISL\_413594 -----  
EPI\_ISL\_413595 -----  
EPI\_ISL\_413596 -----  
EPI\_ISL\_413597 -----  
EPI\_ISL\_413598 -----  
EPI\_ISL\_413599 -----  
EPI\_ISL\_413600 -----  
EPI\_ISL\_413601 -----  
EPI\_ISL\_424217 -----  
EPI\_ISL\_424218 -----  
EPI\_ISL\_424220 -----  
EPI\_ISL\_424232 -----  
EPI\_ISL\_424266 -----  
EPI\_ISL\_424272 -----  
EPI\_ISL\_424283 -----  
EPI\_ISL\_424288 -----  
EPI\_ISL\_424292 -----  
EPI\_ISL\_424295 -----  
EPI\_ISL\_426882 -----

ORF1ab 4081 KNTCDGTTFTYASALWEIQQVVDADSKIVQLSEISMDNSPNLAWPLIVTALRANSVAVKLQ  
EPI\_ISL\_413594 -----  
EPI\_ISL\_413595 -----  
EPI\_ISL\_413596 -----  
EPI\_ISL\_413597 -----  
EPI\_ISL\_413598 -----  
EPI\_ISL\_413599 -----  
EPI\_ISL\_413600 -----  
EPI\_ISL\_413601 -----  
EPI\_ISL\_424217 -----  
EPI\_ISL\_424218 -----  
EPI\_ISL\_424220 -----  
EPI\_ISL\_424232 -----  
EPI\_ISL\_424266 -----  
EPI\_ISL\_424272 -----  
EPI\_ISL\_424283 -----  
EPI\_ISL\_424288 -----  
EPI\_ISL\_424292 -----  
EPI\_ISL\_424295 -----  
EPI\_ISL\_426882 -----

ORF1ab 4141 NNELSPVALRQMSCAAGTTQTACTDDNALAYYNTTKGGRFVLALLSDLQDLKWARFPKSD  
EPI\_ISL\_413594 -----  
EPI\_ISL\_413595 -----  
EPI\_ISL\_413596 -----  
EPI\_ISL\_413597 -----  
EPI\_ISL\_413598 -----  
EPI\_ISL\_413599 -----  
EPI\_ISL\_413600 -----  
EPI\_ISL\_413601 -----  
EPI\_ISL\_424217 -----  
EPI\_ISL\_424218 -----  
EPI\_ISL\_424220 -----  
EPI\_ISL\_424232 -----  
EPI\_ISL\_424266 -----  
EPI\_ISL\_424272 -----  
EPI\_ISL\_424283 -----  
EPI\_ISL\_424288 -----  
EPI\_ISL\_424292 -----  
EPI\_ISL\_424295 -----  
EPI\_ISL\_426882 -----

ORF1ab 4201 GTGTIYTELEPPCRFVTDTPKGPVKYLYFIKGLNNLNRMVGLSLAATVRLQAGNATEV  
EPI\_ISL\_413594 -----  
EPI\_ISL\_413595 -----  
EPI\_ISL\_413596 -----  
EPI\_ISL\_413597 -----  
EPI\_ISL\_413598 -----  
EPI\_ISL\_413599 -----  
EPI\_ISL\_413600 -----  
EPI\_ISL\_413601 -----  
EPI\_ISL\_424217 -----  
EPI\_ISL\_424218 -----  
EPI\_ISL\_424220 -----  
EPI\_ISL\_424232 -----  
EPI\_ISL\_424266 -----  
EPI\_ISL\_424272 -----  
EPI\_ISL\_424283 -----  
EPI\_ISL\_424288 -----  
EPI\_ISL\_424292 -----  
EPI\_ISL\_424295 -----  
EPI\_ISL\_426882 -----

ORF1ab 4261 PANSTVLSFCAFAVDAAKAYKDYLASGGQPITNCVKMLCTHTGTGQAITVTPKANMDQES  
EPI\_ISL\_413594 -----  
EPI\_ISL\_413595 -----  
EPI\_ISL\_413596 -----  
EPI\_ISL\_413597 -----  
EPI\_ISL\_413598 -----  
EPI\_ISL\_413599 -----  
EPI\_ISL\_413600 -----  
EPI\_ISL\_413601 -----  
EPI\_ISL\_424217 -----  
EPI\_ISL\_424218 -----  
EPI\_ISL\_424220 -----  
EPI\_ISL\_424232 -----  
EPI\_ISL\_424266 -----  
EPI\_ISL\_424272 -----  
EPI\_ISL\_424283 -----  
EPI\_ISL\_424288 -----  
EPI\_ISL\_424292 -----  
EPI\_ISL\_424295 -----  
EPI\_ISL\_426882 -----

ORF1ab 4321 FGGASCCLYCRCHIDHPNPKGFCDLKGKYVQIPTTCANDPVGFTLKNNTVCTVCGMWKGYG  
EPI\_ISL\_413594 -----  
EPI\_ISL\_413595 -----  
EPI\_ISL\_413596 -----  
EPI\_ISL\_413597 -----  
EPI\_ISL\_413598 -----  
EPI\_ISL\_413599 -----  
EPI\_ISL\_413600 -----  
EPI\_ISL\_413601 -----  
EPI\_ISL\_424217 -----  
EPI\_ISL\_424218 -----  
EPI\_ISL\_424220 -----  
EPI\_ISL\_424232 -----  
EPI\_ISL\_424266 -----  
EPI\_ISL\_424272 -----  
EPI\_ISL\_424283 -----  
EPI\_ISL\_424288 -----  
EPI\_ISL\_424292 -----  
EPI\_ISL\_424295 -----  
EPI\_ISL\_426882 -----

ORF1ab 4381 CSCDQLREPLQSDAQSFNLRVCGVSAARLTPCGTGTSTDVVYRAFDIYNDKVAGFAKF  
EPI\_ISL\_413594 -----  
EPI\_ISL\_413595 -----  
EPI\_ISL\_413596 -----  
EPI\_ISL\_413597 -----  
EPI\_ISL\_413598 -----  
EPI\_ISL\_413599 -----  
EPI\_ISL\_413600 -----  
EPI\_ISL\_413601 -----  
EPI\_ISL\_424217 -----  
EPI\_ISL\_424218 -----  
EPI\_ISL\_424220 -----  
EPI\_ISL\_424232 -----  
EPI\_ISL\_424266 -----  
EPI\_ISL\_424272 -----  
EPI\_ISL\_424283 -----  
EPI\_ISL\_424288 -----  
EPI\_ISL\_424292 -----  
EPI\_ISL\_424295 -----  
EPI\_ISL\_426882 -----

ORF1ab 4441 LKTNCCRFQEKDEDDNLDISYFVVKRHTFSNYQHEETIYNLLKDCPAVAKHDFKFRIDG  
EPI\_ISL\_413594 -----  
EPI\_ISL\_413595 -----  
EPI\_ISL\_413596 -----  
EPI\_ISL\_413597 -----  
EPI\_ISL\_413598 -----  
EPI\_ISL\_413599 -----  
EPI\_ISL\_413600 -----  
EPI\_ISL\_413601 -----  
EPI\_ISL\_424217 -----  
EPI\_ISL\_424218 -----  
EPI\_ISL\_424220 -----  
EPI\_ISL\_424232 -----  
EPI\_ISL\_424266 -----  
EPI\_ISL\_424272 -----  
EPI\_ISL\_424283 -----  
EPI\_ISL\_424288 -----  
EPI\_ISL\_424292 -----  
EPI\_ISL\_424295 -----  
EPI\_ISL\_426882 -----



ORF1ab 4501 DMVPHISRQLTKYTMADLVYALRHFDEGNCDTLKEILVTYNCCDDDYFNKKDWYDFVEN  
EPI\_ISL\_413594 -----  
EPI\_ISL\_413595 -----  
EPI\_ISL\_413596 -----  
EPI\_ISL\_413597 -----  
EPI\_ISL\_413598 -----  
EPI\_ISL\_413599 -----  
EPI\_ISL\_413600 -----  
EPI\_ISL\_413601 -----  
EPI\_ISL\_424217 -----  
EPI\_ISL\_424218 -----  
EPI\_ISL\_424220 -----  
EPI\_ISL\_424232 -----  
EPI\_ISL\_424266 -----  
EPI\_ISL\_424272 -----  
EPI\_ISL\_424283 -----  
EPI\_ISL\_424288 -----  
EPI\_ISL\_424292 -----  
EPI\_ISL\_424295 -----  
EPI\_ISL\_426882 -----

ORF1ab 4561 PDILRVYANLGERVRQALLKTIVQFCDAMRNAGIVGVLTLDNQLNGNWDYDFGDFIQTTTPG  
EPI\_ISL\_413594 -----  
EPI\_ISL\_413595 -----  
EPI\_ISL\_413596 -----  
EPI\_ISL\_413597 -----  
EPI\_ISL\_413598 -----  
EPI\_ISL\_413599 -----  
EPI\_ISL\_413600 -----  
EPI\_ISL\_413601 -----  
EPI\_ISL\_424217 -----  
EPI\_ISL\_424218 -----  
EPI\_ISL\_424220 -----  
EPI\_ISL\_424232 -----  
EPI\_ISL\_424266 -----  
EPI\_ISL\_424272 -----  
EPI\_ISL\_424283 -----  
EPI\_ISL\_424288 -----  
EPI\_ISL\_424292 -----  
EPI\_ISL\_424295 -----  
EPI\_ISL\_426882 -----

ORF1ab 4621 SGVPVVDSSYSLMLPILTLTRALTAESHVDTDLTKPYIKWDLKDYDFTEERLKLFDYFK  
EPI\_ISL\_413594 -----  
EPI\_ISL\_413595 -----  
EPI\_ISL\_413596 -----  
EPI\_ISL\_413597 -----  
EPI\_ISL\_413598 -----  
EPI\_ISL\_413599 -----  
EPI\_ISL\_413600 -----  
EPI\_ISL\_413601 -----  
EPI\_ISL\_424217 -----  
EPI\_ISL\_424218 -----  
EPI\_ISL\_424220 -----  
EPI\_ISL\_424232 -----  
EPI\_ISL\_424266 -----  
EPI\_ISL\_424272 -----  
EPI\_ISL\_424283 -----  
EPI\_ISL\_424288 -----  
EPI\_ISL\_424292 -----  
EPI\_ISL\_424295 -----  
EPI\_ISL\_426882 -----

ORF1ab 4681 YWDQTYHPNCVNCLDDRCILHCANFNVLVSTVFPPTSFGPLVRKIFVDGVPFVVSTGYHF  
EPI\_ISL\_413594 -----  
EPI\_ISL\_413595 -----  
EPI\_ISL\_413596 -----  
EPI\_ISL\_413597 -----  
EPI\_ISL\_413598 -----  
EPI\_ISL\_413599 -----  
EPI\_ISL\_413600 -----  
EPI\_ISL\_413601 -----  
EPI\_ISL\_424217 -----  
EPI\_ISL\_424218 -----  
EPI\_ISL\_424220 -----  
EPI\_ISL\_424232 -----  
EPI\_ISL\_424266 -----  
EPI\_ISL\_424272 -----  
EPI\_ISL\_424283 -----  
EPI\_ISL\_424288 -----  
EPI\_ISL\_424292 -----  
EPI\_ISL\_424295 -----  
EPI\_ISL\_426882 -----

ORF1ab 4741 RELGVVHNQDVNLHSSRLSFKELLVYAADPAMHAASGNLLLDKRTTCFSVAALTNNVAFQ  
EPI\_ISL\_413594 -----  
EPI\_ISL\_413595 -----  
EPI\_ISL\_413596 -----  
EPI\_ISL\_413597 -----  
EPI\_ISL\_413598 -----  
EPI\_ISL\_413599 -----  
EPI\_ISL\_413600 -----  
EPI\_ISL\_413601 -----  
EPI\_ISL\_424217 -----  
EPI\_ISL\_424218 -----  
EPI\_ISL\_424220 -----  
EPI\_ISL\_424232 -----  
EPI\_ISL\_424266 -----  
EPI\_ISL\_424272 -----  
EPI\_ISL\_424283 -----  
EPI\_ISL\_424288 -----  
EPI\_ISL\_424292 -----  
EPI\_ISL\_424295 -----  
EPI\_ISL\_426882 -----

ORF1ab 4801 TVKPGNFNKDFYDFAVSKGFFKEGSSVELKHFFFAQDGNAAISDYDYRYNLPTMCDIRQ  
EPI\_ISL\_413594 -----  
EPI\_ISL\_413595 -----  
EPI\_ISL\_413596 -----  
EPI\_ISL\_413597 -----  
EPI\_ISL\_413598 -----  
EPI\_ISL\_413599 -----  
EPI\_ISL\_413600 -----  
EPI\_ISL\_413601 -----  
EPI\_ISL\_424217 -----  
EPI\_ISL\_424218 -----  
EPI\_ISL\_424220 -----  
EPI\_ISL\_424232 -----  
EPI\_ISL\_424266 -----  
EPI\_ISL\_424272 -----  
EPI\_ISL\_424283 -----  
EPI\_ISL\_424288 -----  
EPI\_ISL\_424292 -----  
EPI\_ISL\_424295 -----  
EPI\_ISL\_426882 -----

ORF1ab 4861 LLFVVEVVDKYFDCYDGGCINANQVIVNNLDKSAGFPFNKWKARLYYDSMSYEDQDALF  
EPI\_ISL\_413594 -----  
EPI\_ISL\_413595 -----  
EPI\_ISL\_413596 -----  
EPI\_ISL\_413597 -----  
EPI\_ISL\_413598 -----  
EPI\_ISL\_413599 -----  
EPI\_ISL\_413600 -----  
EPI\_ISL\_413601 -----  
EPI\_ISL\_424217 -----  
EPI\_ISL\_424218 -----  
EPI\_ISL\_424220 -----  
EPI\_ISL\_424232 -----  
EPI\_ISL\_424266 -----  
EPI\_ISL\_424272 -----  
EPI\_ISL\_424283 -----  
EPI\_ISL\_424288 -----  
EPI\_ISL\_424292 -----  
EPI\_ISL\_424295 -----  
EPI\_ISL\_426882 -----

ORF1ab 4921 AYTKRNVIPTITQMNLYAISAKNRARTVAGVSICTMTNRQFHQKLLKLSIAATRGTVV  
EPI\_ISL\_413594 -----  
EPI\_ISL\_413595 -----  
EPI\_ISL\_413596 -----  
EPI\_ISL\_413597 -----  
EPI\_ISL\_413598 -----  
EPI\_ISL\_413599 -----  
EPI\_ISL\_413600 -----  
EPI\_ISL\_413601 -----  
EPI\_ISL\_424217 -----  
EPI\_ISL\_424218 -----  
EPI\_ISL\_424220 -----  
EPI\_ISL\_424232 -----  
EPI\_ISL\_424266 -----  
EPI\_ISL\_424272 -----  
EPI\_ISL\_424283 -----  
EPI\_ISL\_424288 -----  
EPI\_ISL\_424292 -----  
EPI\_ISL\_424295 -----  
EPI\_ISL\_426882 -----

ORF1ab 4981 IGTSKFYGGWHNMLKTVYSDVENPHLMGWDYPKCDRAMPNMLRIMASLVLARKHTTCCSL  
EPI\_ISL\_413594 -----  
EPI\_ISL\_413595 -----  
EPI\_ISL\_413596 -----  
EPI\_ISL\_413597 -----  
EPI\_ISL\_413598 -----  
EPI\_ISL\_413599 -----  
EPI\_ISL\_413600 -----  
EPI\_ISL\_413601 -----  
EPI\_ISL\_424217 -----  
EPI\_ISL\_424218 -----  
EPI\_ISL\_424220 -----  
EPI\_ISL\_424232 -----  
EPI\_ISL\_424266 -----  
EPI\_ISL\_424272 -----  
EPI\_ISL\_424283 -----  
EPI\_ISL\_424288 -----  
EPI\_ISL\_424292 -----  
EPI\_ISL\_424295 -----  
EPI\_ISL\_426882 -----

ORF1ab 5041 SHRFYRLANECAQVLSEMVMCGGSLYVKPGGTSSGDATTAYANSVFNICQAVTANVNALL  
EPI\_ISL\_413594 -----  
EPI\_ISL\_413595 -----  
EPI\_ISL\_413596 -----  
EPI\_ISL\_413597 -----  
EPI\_ISL\_413598 -----  
EPI\_ISL\_413599 -----  
EPI\_ISL\_413600 -----  
EPI\_ISL\_413601 -----  
EPI\_ISL\_424217 -----  
EPI\_ISL\_424218 -----  
EPI\_ISL\_424220 -----  
EPI\_ISL\_424232 -----  
EPI\_ISL\_424266 -----  
EPI\_ISL\_424272 -----  
EPI\_ISL\_424283 -----  
EPI\_ISL\_424288 -----  
EPI\_ISL\_424292 -----  
EPI\_ISL\_424295 -----  
EPI\_ISL\_426882 -----

ORF1ab 5101 STDGNKIADKYVRNLQHRLYECLYRNRDVTDFVNEFYAYLRKHFSMMILSDDAVVCFNS  
EPI\_ISL\_413594 -----  
EPI\_ISL\_413595 -----  
EPI\_ISL\_413596 -----  
EPI\_ISL\_413597 -----  
EPI\_ISL\_413598 -----  
EPI\_ISL\_413599 -----  
EPI\_ISL\_413600 -----  
EPI\_ISL\_413601 -----  
EPI\_ISL\_424217 -----  
EPI\_ISL\_424218 -----  
EPI\_ISL\_424220 -----  
EPI\_ISL\_424232 -----  
EPI\_ISL\_424266 -----  
EPI\_ISL\_424272 -----  
EPI\_ISL\_424283 -----  
EPI\_ISL\_424288 -----  
EPI\_ISL\_424292 -----  
EPI\_ISL\_424295 -----  
EPI\_ISL\_426882 -----

ORF1ab 5161 TYASQGLVASIKNFKSVLYYQNNVFMSEAKCWTETDLTKGPHEFCSQHTMLVKQGDDYVY  
EPI\_ISL\_413594 -----  
EPI\_ISL\_413595 -----  
EPI\_ISL\_413596 -----  
EPI\_ISL\_413597 -----  
EPI\_ISL\_413598 -----  
EPI\_ISL\_413599 -----  
EPI\_ISL\_413600 -----  
EPI\_ISL\_413601 -----  
EPI\_ISL\_424217 -----  
EPI\_ISL\_424218 -----  
EPI\_ISL\_424220 -----  
EPI\_ISL\_424232 -----  
EPI\_ISL\_424266 -----  
EPI\_ISL\_424272 -----  
EPI\_ISL\_424283 -----  
EPI\_ISL\_424288 -----  
EPI\_ISL\_424292 -----  
EPI\_ISL\_424295 -----  
EPI\_ISL\_426882 -----

ORF1ab 5221 LPYPDPSRILGAGCFVDDIVKTDGTLMIERFVSLAIDAYPLTKHPNQEYADVFLYLQYI  
EPI\_ISL\_413594 -----  
EPI\_ISL\_413595 -----  
EPI\_ISL\_413596 -----  
EPI\_ISL\_413597 -----  
EPI\_ISL\_413598 -----  
EPI\_ISL\_413599 -----  
EPI\_ISL\_413600 -----  
EPI\_ISL\_413601 -----  
EPI\_ISL\_424217 -----  
EPI\_ISL\_424218 -----  
EPI\_ISL\_424220 -----  
EPI\_ISL\_424232 -----  
EPI\_ISL\_424266 -----  
EPI\_ISL\_424272 -----  
EPI\_ISL\_424283 -----  
EPI\_ISL\_424288 -----  
EPI\_ISL\_424292 -----  
EPI\_ISL\_424295 -----  
EPI\_ISL\_426882 -----

ORF1ab 5281 RKLHDELGTGHMLDMYSVMLTNDNTSRYWEPEFYEAMYPHTVLQAVGACVLCNSQTSLRC  
EPI\_ISL\_413594 -----  
EPI\_ISL\_413595 -----  
EPI\_ISL\_413596 -----  
EPI\_ISL\_413597 -----  
EPI\_ISL\_413598 -----  
EPI\_ISL\_413599 -----  
EPI\_ISL\_413600 -----  
EPI\_ISL\_413601 -----  
EPI\_ISL\_424217 -----  
EPI\_ISL\_424218 -----  
EPI\_ISL\_424220 -----  
EPI\_ISL\_424232 -----  
EPI\_ISL\_424266 -----  
EPI\_ISL\_424272 -----  
EPI\_ISL\_424283 -----  
EPI\_ISL\_424288 -----  
EPI\_ISL\_424292 -----  
EPI\_ISL\_424295 -----  
EPI\_ISL\_426882 -----

ORF1ab 5341 GACIRRPFLCCKCCYDHVISTSHKLVLSVNPYVCNAPGCDVTDVTDVTLQYLLGGMSYYCKSHK  
EPI\_ISL\_413594 -----  
EPI\_ISL\_413595 -----  
EPI\_ISL\_413596 -----  
EPI\_ISL\_413597 -----  
EPI\_ISL\_413598 -----  
EPI\_ISL\_413599 -----  
EPI\_ISL\_413600 -----  
EPI\_ISL\_413601 -----  
EPI\_ISL\_424217 -----  
EPI\_ISL\_424218 -----  
EPI\_ISL\_424220 -----  
EPI\_ISL\_424232 -----  
EPI\_ISL\_424266 -----  
EPI\_ISL\_424272 -----  
EPI\_ISL\_424283 -----  
EPI\_ISL\_424288 -----  
EPI\_ISL\_424292 -----  
EPI\_ISL\_424295 -----  
EPI\_ISL\_426882 -----

ORF1ab 5401 PPISFPLCANGQVFGLYKNTCVGSDNVTDFNAIATCDWTNAGDYILANTCTERLKLFAAE  
EPI\_ISL\_413594 -----  
EPI\_ISL\_413595 -----  
EPI\_ISL\_413596 -----  
EPI\_ISL\_413597 -----  
EPI\_ISL\_413598 -----  
EPI\_ISL\_413599 -----  
EPI\_ISL\_413600 -----  
EPI\_ISL\_413601 -----  
EPI\_ISL\_424217 -----  
EPI\_ISL\_424218 -----  
EPI\_ISL\_424220 -----  
EPI\_ISL\_424232 -----  
EPI\_ISL\_424266 -----  
EPI\_ISL\_424272 -----  
EPI\_ISL\_424283 -----  
EPI\_ISL\_424288 -----  
EPI\_ISL\_424292 -----  
EPI\_ISL\_424295 -----  
EPI\_ISL\_426882 -----

ORF1ab 5461 TLKATEETFKLSYGIATVREVLSDRELHLSWEVGKPRPPLNRNYVFTGYRVTKNSKVQIG  
EPI\_ISL\_413594 -----  
EPI\_ISL\_413595 -----  
EPI\_ISL\_413596 -----  
EPI\_ISL\_413597 -----  
EPI\_ISL\_413598 -----  
EPI\_ISL\_413599 -----  
EPI\_ISL\_413600 -----  
EPI\_ISL\_413601 -----  
EPI\_ISL\_424217 -----  
EPI\_ISL\_424218 -----  
EPI\_ISL\_424220 -----  
EPI\_ISL\_424232 -----  
EPI\_ISL\_424266 -----  
EPI\_ISL\_424272 -----  
EPI\_ISL\_424283 -----  
EPI\_ISL\_424288 -----  
EPI\_ISL\_424292 -----  
EPI\_ISL\_424295 -----  
EPI\_ISL\_426882 -----

ORF1ab 5521 EYTFEKGDYGDVVYRGTTTTYKLNVDYFVLTSHTVMPLSAPTLVLPQEHYVRITGLYPTL  
EPI\_ISL\_413594 -----  
EPI\_ISL\_413595 -----  
EPI\_ISL\_413596 -----  
EPI\_ISL\_413597 -----  
EPI\_ISL\_413598 -----  
EPI\_ISL\_413599 -----  
EPI\_ISL\_413600 -----  
EPI\_ISL\_413601 -----  
EPI\_ISL\_424217 -----  
EPI\_ISL\_424218 -----  
EPI\_ISL\_424220 -----  
EPI\_ISL\_424232 -----  
EPI\_ISL\_424266 -----  
EPI\_ISL\_424272 -----  
EPI\_ISL\_424283 -----  
EPI\_ISL\_424288 -----  
EPI\_ISL\_424292 -----  
EPI\_ISL\_424295 -----  
EPI\_ISL\_426882 -----

ORF1ab 5581 NISDEFSSNVANYQKVGMMQKYSTLQGPPGTGKSHFAIGLALYYPSARIVYTACSHAAVDA  
EPI\_ISL\_413594 -----  
EPI\_ISL\_413595 -----  
EPI\_ISL\_413596 -----  
EPI\_ISL\_413597 -----  
EPI\_ISL\_413598 -----  
EPI\_ISL\_413599 -----  
EPI\_ISL\_413600 -----  
EPI\_ISL\_413601 -----  
EPI\_ISL\_424217 -----  
EPI\_ISL\_424218 -----  
EPI\_ISL\_424220 -----  
EPI\_ISL\_424232 -----  
EPI\_ISL\_424266 -----  
EPI\_ISL\_424272 -----  
EPI\_ISL\_424283 -----  
EPI\_ISL\_424288 -----  
EPI\_ISL\_424292 -----  
EPI\_ISL\_424295 -----  
EPI\_ISL\_426882 -----

ORF1ab 5641 LCEKALKYLPIDKCSRIIPARARVECFDKFKVNSTLEQYVFCTVNALPETTADIVVFDEI  
EPI\_ISL\_413594 -----  
EPI\_ISL\_413595 -----  
EPI\_ISL\_413596 -----  
EPI\_ISL\_413597 -----  
EPI\_ISL\_413598 -----  
EPI\_ISL\_413599 -----  
EPI\_ISL\_413600 -----  
EPI\_ISL\_413601 -----  
EPI\_ISL\_424217 -----  
EPI\_ISL\_424218 -----  
EPI\_ISL\_424220 -----  
EPI\_ISL\_424232 -----  
EPI\_ISL\_424266 -----  
EPI\_ISL\_424272 -----  
EPI\_ISL\_424283 -----  
EPI\_ISL\_424288 -----  
EPI\_ISL\_424292 -----  
EPI\_ISL\_424295 -----  
EPI\_ISL\_426882 -----

ORF1ab 5701 SMATNYDLSVNVNARLRKHYVYIGDPAQLPAPRTLLTKGTLEPEYFNSVCRLMKTIGPDM  
EPI\_ISL\_413594 -----  
EPI\_ISL\_413595 -----  
EPI\_ISL\_413596 -----  
EPI\_ISL\_413597 -----  
EPI\_ISL\_413598 -----  
EPI\_ISL\_413599 -----  
EPI\_ISL\_413600 -----  
EPI\_ISL\_413601 -----  
EPI\_ISL\_424217 -----  
EPI\_ISL\_424218 -----  
EPI\_ISL\_424220 -----  
EPI\_ISL\_424232 -----  
EPI\_ISL\_424266 -----  
EPI\_ISL\_424272 -----  
EPI\_ISL\_424283 -----  
EPI\_ISL\_424288 -----  
EPI\_ISL\_424292 -----  
EPI\_ISL\_424295 -----  
EPI\_ISL\_426882 -----

ORF1ab 5761 FLGTCRRCPAEIVDVTVSALVYDNKCLKAHKDKSAQCCKMFYKGVITHDVSSAINRPQIGVV  
EPI\_ISL\_413594 -----  
EPI\_ISL\_413595 -----  
EPI\_ISL\_413596 -----  
EPI\_ISL\_413597 -----  
EPI\_ISL\_413598 -----  
EPI\_ISL\_413599 -----  
EPI\_ISL\_413600 -----  
EPI\_ISL\_413601 -----  
EPI\_ISL\_424217 -----  
EPI\_ISL\_424218 -----  
EPI\_ISL\_424220 -----  
EPI\_ISL\_424232 -----  
EPI\_ISL\_424266 -----  
EPI\_ISL\_424272 -----  
EPI\_ISL\_424283 -----  
EPI\_ISL\_424288 -----  
EPI\_ISL\_424292 -----  
EPI\_ISL\_424295 -----  
EPI\_ISL\_426882 -----

ORF1ab 5821 REFLTRNPAWRKAVFISPYNSQNAVASKILGLPTQTVDSSQGSEYDYVIFTQTETAHSC  
EPI\_ISL\_413594 -----  
EPI\_ISL\_413595 -----  
EPI\_ISL\_413596 -----  
EPI\_ISL\_413597 -----  
EPI\_ISL\_413598 -----  
EPI\_ISL\_413599 -----  
EPI\_ISL\_413600 -----  
EPI\_ISL\_413601 -----  
EPI\_ISL\_424217 -----  
EPI\_ISL\_424218 -----  
EPI\_ISL\_424220 -----  
EPI\_ISL\_424232 -----  
EPI\_ISL\_424266 -----  
EPI\_ISL\_424272 -----  
EPI\_ISL\_424283 -----  
EPI\_ISL\_424288 -----  
EPI\_ISL\_424292 -----  
EPI\_ISL\_424295 -----  
EPI\_ISL\_426882 -----

ORF1ab 5881 NVNRFNVAITRAKVGILCIMSDDRDLYDKLQFTSLEIPRRNVATLQAENVTLGLFKDCSKVI  
EPI\_ISL\_413594 -----  
EPI\_ISL\_413595 -----  
EPI\_ISL\_413596 -----  
EPI\_ISL\_413597 -----  
EPI\_ISL\_413598 -----  
EPI\_ISL\_413599 -----  
EPI\_ISL\_413600 -----  
EPI\_ISL\_413601 -----  
EPI\_ISL\_424217 -----  
EPI\_ISL\_424218 -----  
EPI\_ISL\_424220 -----  
EPI\_ISL\_424232 -----  
EPI\_ISL\_424266 -----  
EPI\_ISL\_424272 -----  
EPI\_ISL\_424283 -----  
EPI\_ISL\_424288 -----  
EPI\_ISL\_424292 -----  
EPI\_ISL\_424295 -----  
EPI\_ISL\_426882 -----



ORF1ab 5941 TGLHPTQAPTHLSVDTKFKTEGLCVDIPGIPKDMTYRRLISMMGFKMNYQVNGYPNMFIT  
EPI\_ISL\_413594 -----  
EPI\_ISL\_413595 -----  
EPI\_ISL\_413596 -----  
EPI\_ISL\_413597 -----  
EPI\_ISL\_413598 -----  
EPI\_ISL\_413599 -----  
EPI\_ISL\_413600 -----  
EPI\_ISL\_413601 -----  
EPI\_ISL\_424217 -----  
EPI\_ISL\_424218 -----  
EPI\_ISL\_424220 -----  
EPI\_ISL\_424232 -----  
EPI\_ISL\_424266 -----  
EPI\_ISL\_424272 -----  
EPI\_ISL\_424283 -----  
EPI\_ISL\_424288 -----  
EPI\_ISL\_424292 -----  
EPI\_ISL\_424295 -----  
EPI\_ISL\_426882 -----

ORF1ab 6001 REEAI RHVRAWIGFDVEGCHATREAVGTNLPLQLGFSTGVNLVAVPTGYVDTPNNTDFSR  
EPI\_ISL\_413594 -----  
EPI\_ISL\_413595 -----  
EPI\_ISL\_413596 -----  
EPI\_ISL\_413597 -----  
EPI\_ISL\_413598 -----  
EPI\_ISL\_413599 -----  
EPI\_ISL\_413600 -----  
EPI\_ISL\_413601 -----  
EPI\_ISL\_424217 -----  
EPI\_ISL\_424218 -----  
EPI\_ISL\_424220 -----  
EPI\_ISL\_424232 -----  
EPI\_ISL\_424266 -----  
EPI\_ISL\_424272 -----  
EPI\_ISL\_424283 -----  
EPI\_ISL\_424288 -----  
EPI\_ISL\_424292 -----  
EPI\_ISL\_424295 -----  
EPI\_ISL\_426882 -----

ORF1ab 6061 VSAKPPPGDQFKHLIPLMYKGLPWNVVRKIVQMLSDTLKNLSDRVVFVLWAHGFELTSM  
EPI\_ISL\_413594 -----  
EPI\_ISL\_413595 -----  
EPI\_ISL\_413596 -----  
EPI\_ISL\_413597 -----  
EPI\_ISL\_413598 -----  
EPI\_ISL\_413599 -----  
EPI\_ISL\_413600 -----  
EPI\_ISL\_413601 -----  
EPI\_ISL\_424217 -----  
EPI\_ISL\_424218 -----  
EPI\_ISL\_424220 -----  
EPI\_ISL\_424232 -----  
EPI\_ISL\_424266 -----  
EPI\_ISL\_424272 -----  
EPI\_ISL\_424283 -----  
EPI\_ISL\_424288 -----  
EPI\_ISL\_424292 -----  
EPI\_ISL\_424295 -----  
EPI\_ISL\_426882 -----

ORF1ab 6121 KYFVKIGPERTCCLCDRRATCFSTASDTYACWHHSIGFDYVYNPFMIDVQQWGFTGNLQS  
EPI\_ISL\_413594 -----  
EPI\_ISL\_413595 -----  
EPI\_ISL\_413596 -----  
EPI\_ISL\_413597 -----  
EPI\_ISL\_413598 -----  
EPI\_ISL\_413599 -----  
EPI\_ISL\_413600 -----  
EPI\_ISL\_413601 -----  
EPI\_ISL\_424217 -----  
EPI\_ISL\_424218 -----  
EPI\_ISL\_424220 -----  
EPI\_ISL\_424232 -----  
EPI\_ISL\_424266 -----  
EPI\_ISL\_424272 -----  
EPI\_ISL\_424283 -----  
EPI\_ISL\_424288 -----  
EPI\_ISL\_424292 -----  
EPI\_ISL\_424295 -----  
EPI\_ISL\_426882 -----

ORF1ab 6181 NHDLYCQVHGNAHVASCDAIMTRCLAVHECFVKRVDWTIEYPIIGDELKINAACRQVQHM  
EPI\_ISL\_413594 -----  
EPI\_ISL\_413595 -----  
EPI\_ISL\_413596 -----  
EPI\_ISL\_413597 -----  
EPI\_ISL\_413598 -----  
EPI\_ISL\_413599 -----  
EPI\_ISL\_413600 -----  
EPI\_ISL\_413601 -----  
EPI\_ISL\_424217 -----  
EPI\_ISL\_424218 -----  
EPI\_ISL\_424220 -----  
EPI\_ISL\_424232 -----  
EPI\_ISL\_424266 -----  
EPI\_ISL\_424272 -----  
EPI\_ISL\_424283 -----  
EPI\_ISL\_424288 -----  
EPI\_ISL\_424292 -----  
EPI\_ISL\_424295 -----  
EPI\_ISL\_426882 -----

ORF1ab 6241 VVKAALLADKFPVLHDIGNPKAIKCVPQADVEWKFYDAQPCSDKAYKIEELFYATHSD  
EPI\_ISL\_413594 -----  
EPI\_ISL\_413595 -----  
EPI\_ISL\_413596 -----  
EPI\_ISL\_413597 -----  
EPI\_ISL\_413598 -----  
EPI\_ISL\_413599 -----  
EPI\_ISL\_413600 -----  
EPI\_ISL\_413601 -----  
EPI\_ISL\_424217 -----  
EPI\_ISL\_424218 -----  
EPI\_ISL\_424220 -----  
EPI\_ISL\_424232 -----  
EPI\_ISL\_424266 -----  
EPI\_ISL\_424272 -----  
EPI\_ISL\_424283 -----  
EPI\_ISL\_424288 -----  
EPI\_ISL\_424292 -----  
EPI\_ISL\_424295 -----  
EPI\_ISL\_426882 -----

ORF1ab 6301 KFTDGVCLFWNCNVDRYPANSIVCRFDTRVLSNLNLPGCDGGSLYVVKHAFHTPAFDKSA  
EPI\_ISL\_413594 -----  
EPI\_ISL\_413595 -----  
EPI\_ISL\_413596 -----  
EPI\_ISL\_413597 -----  
EPI\_ISL\_413598 -----  
EPI\_ISL\_413599 -----  
EPI\_ISL\_413600 -----  
EPI\_ISL\_413601 -----  
EPI\_ISL\_424217 -----  
EPI\_ISL\_424218 -----  
EPI\_ISL\_424220 -----  
EPI\_ISL\_424232 -----  
EPI\_ISL\_424266 -----  
EPI\_ISL\_424272 -----  
EPI\_ISL\_424283 -----  
EPI\_ISL\_424288 -----  
EPI\_ISL\_424292 -----  
EPI\_ISL\_424295 -----  
EPI\_ISL\_426882 -----

ORF1ab 6361 FVNLKQLPFFYYSDSPCESHGKQVVSDDIDYVPLKSATCITRCNLGGAVCRHHANEYRLYL  
EPI\_ISL\_413594 -----  
EPI\_ISL\_413595 -----  
EPI\_ISL\_413596 -----  
EPI\_ISL\_413597 -----  
EPI\_ISL\_413598 -----  
EPI\_ISL\_413599 -----  
EPI\_ISL\_413600 -----  
EPI\_ISL\_413601 -----  
EPI\_ISL\_424217 -----  
EPI\_ISL\_424218 -----  
EPI\_ISL\_424220 -----  
EPI\_ISL\_424232 -----  
EPI\_ISL\_424266 -----  
EPI\_ISL\_424272 -----  
EPI\_ISL\_424283 -----  
EPI\_ISL\_424288 -----  
EPI\_ISL\_424292 -----  
EPI\_ISL\_424295 -----  
EPI\_ISL\_426882 -----

ORF1ab 6421 DAYNMMISAGFSLWVYKQFDTYNLWNTFTRLQSLNVAFNVVNKGHFDGQQGEVPSIIN  
EPI\_ISL\_413594 -----  
EPI\_ISL\_413595 -----  
EPI\_ISL\_413596 -----  
EPI\_ISL\_413597 -----  
EPI\_ISL\_413598 -----  
EPI\_ISL\_413599 -----  
EPI\_ISL\_413600 -----  
EPI\_ISL\_413601 -----  
EPI\_ISL\_424217 -----  
EPI\_ISL\_424218 -----  
EPI\_ISL\_424220 -----  
EPI\_ISL\_424232 -----  
EPI\_ISL\_424266 -----  
EPI\_ISL\_424272 -----  
EPI\_ISL\_424283 -----  
EPI\_ISL\_424288 -----  
EPI\_ISL\_424292 -----  
EPI\_ISL\_424295 -----  
EPI\_ISL\_426882 -----

ORF1ab 6481 NTVYTKVDGVDVELFENKTTLPVNVAFELWAKRNIKPVPEVKILNNLGVDAANTVIWDY  
EPI\_ISL\_413594 -----  
EPI\_ISL\_413595 -----  
EPI\_ISL\_413596 -----  
EPI\_ISL\_413597 -----  
EPI\_ISL\_413598 -----  
EPI\_ISL\_413599 -----  
EPI\_ISL\_413600 -----  
EPI\_ISL\_413601 -----  
EPI\_ISL\_424217 -----  
EPI\_ISL\_424218 -----  
EPI\_ISL\_424220 -----  
EPI\_ISL\_424232 -----  
EPI\_ISL\_424266 -----  
EPI\_ISL\_424272 -----  
EPI\_ISL\_424283 -----  
EPI\_ISL\_424288 -----  
EPI\_ISL\_424292 -----  
EPI\_ISL\_424295 -----  
EPI\_ISL\_426882 -----

ORF1ab 6541 KRDAHAHISTIGVCSMTDIAKKPTETICAPLTVFFDGRVDGQVDLFRNARNGVLITEGSV  
EPI\_ISL\_413594 -----  
EPI\_ISL\_413595 -----  
EPI\_ISL\_413596 -----  
EPI\_ISL\_413597 -----  
EPI\_ISL\_413598 -----  
EPI\_ISL\_413599 -----  
EPI\_ISL\_413600 -----  
EPI\_ISL\_413601 -----  
EPI\_ISL\_424217 -----  
EPI\_ISL\_424218 -----  
EPI\_ISL\_424220 -----  
EPI\_ISL\_424232 -----  
EPI\_ISL\_424266 -----  
EPI\_ISL\_424272 -----  
EPI\_ISL\_424283 -----  
EPI\_ISL\_424288 -----  
EPI\_ISL\_424292 -----  
EPI\_ISL\_424295 -----  
EPI\_ISL\_426882 -----

ORF1ab 6601 KGLQPSVGPKQASLNGVTLIGEAVKTQFNYYKKVDGVVQQLPETYFTQSRNLQEFKPRSQ  
EPI\_ISL\_413594 -----  
EPI\_ISL\_413595 -----  
EPI\_ISL\_413596 -----  
EPI\_ISL\_413597 -----  
EPI\_ISL\_413598 -----  
EPI\_ISL\_413599 -----  
EPI\_ISL\_413600 -----  
EPI\_ISL\_413601 -----  
EPI\_ISL\_424217 -----  
EPI\_ISL\_424218 -----  
EPI\_ISL\_424220 -----  
EPI\_ISL\_424232 -----  
EPI\_ISL\_424266 -----  
EPI\_ISL\_424272 -----  
EPI\_ISL\_424283 -----  
EPI\_ISL\_424288 -----  
EPI\_ISL\_424292 -----  
EPI\_ISL\_424295 -----  
EPI\_ISL\_426882 -----

ORF1ab 6661 MEIDFLELAMDEFIERYKLEGYAFEHIVYGDFSHSQLGGLHLLI GLAKRFKESPFLEDF  
EPI\_ISL\_413594 -----  
EPI\_ISL\_413595 -----  
EPI\_ISL\_413596 -----  
EPI\_ISL\_413597 -----  
EPI\_ISL\_413598 -----  
EPI\_ISL\_413599 -----  
EPI\_ISL\_413600 -----  
EPI\_ISL\_413601 -----  
EPI\_ISL\_424217 -----  
EPI\_ISL\_424218 -----  
EPI\_ISL\_424220 -----  
EPI\_ISL\_424232 -----  
EPI\_ISL\_424266 -----  
EPI\_ISL\_424272 -----  
EPI\_ISL\_424283 -----  
EPI\_ISL\_424288 -----  
EPI\_ISL\_424292 -----  
EPI\_ISL\_424295 -----  
EPI\_ISL\_426882 -----

ORF1ab 6721 IPMDSTVKNYFITDAQTGSSKCVCSVIDLLLDDFVEI IKSQDLSVVSQVVKVTIDYTEIS  
EPI\_ISL\_413594 -----  
EPI\_ISL\_413595 -----  
EPI\_ISL\_413596 -----  
EPI\_ISL\_413597 -----  
EPI\_ISL\_413598 -----  
EPI\_ISL\_413599 -----  
EPI\_ISL\_413600 -----  
EPI\_ISL\_413601 -----  
EPI\_ISL\_424217 -----  
EPI\_ISL\_424218 -----  
EPI\_ISL\_424220 -----  
EPI\_ISL\_424232 -----  
EPI\_ISL\_424266 -----  
EPI\_ISL\_424272 -----  
EPI\_ISL\_424283 -----  
EPI\_ISL\_424288 -----  
EPI\_ISL\_424292 -----  
EPI\_ISL\_424295 -----  
EPI\_ISL\_426882 -----

ORF1ab 6781 FMLWCKDGHVETFYPKLQSSQAWQPGVAMPNLYKMQRMLLEKCDLQNYGDSATLPGKIMM  
EPI\_ISL\_413594 -----  
EPI\_ISL\_413595 -----  
EPI\_ISL\_413596 -----  
EPI\_ISL\_413597 -----  
EPI\_ISL\_413598 -----  
EPI\_ISL\_413599 -----  
EPI\_ISL\_413600 -----  
EPI\_ISL\_413601 -----  
EPI\_ISL\_424217 -----  
EPI\_ISL\_424218 -----  
EPI\_ISL\_424220 -----  
EPI\_ISL\_424232 -----  
EPI\_ISL\_424266 -----  
EPI\_ISL\_424272 -----  
EPI\_ISL\_424283 -----  
EPI\_ISL\_424288 -----  
EPI\_ISL\_424292 -----  
EPI\_ISL\_424295 -----  
EPI\_ISL\_426882 -----

ORF1ab 6841 NVAKYTQLCQYLNTLTLAVPYNMRVIHFGAGSDKGVAPGTAVLRQWLPTGTLVDSDLND  
EPI\_ISL\_413594 -----  
EPI\_ISL\_413595 -----  
EPI\_ISL\_413596 -----  
EPI\_ISL\_413597 -----  
EPI\_ISL\_413598 -----  
EPI\_ISL\_413599 -----  
EPI\_ISL\_413600 -----  
EPI\_ISL\_413601 -----  
EPI\_ISL\_424217 -----  
EPI\_ISL\_424218 -----  
EPI\_ISL\_424220 -----  
EPI\_ISL\_424232 -----  
EPI\_ISL\_424266 -----  
EPI\_ISL\_424272 -----  
EPI\_ISL\_424283 -----  
EPI\_ISL\_424288 -----  
EPI\_ISL\_424292 -----  
EPI\_ISL\_424295 -----  
EPI\_ISL\_426882 -----

ORF1ab 6901 FVSDADSTLIGDCATVHTANKWDLIISDMYDPKTKNVTKENDSKEGFFTYICGFIQOKLA  
EPI\_ISL\_413594 -----  
EPI\_ISL\_413595 -----  
EPI\_ISL\_413596 -----  
EPI\_ISL\_413597 -----  
EPI\_ISL\_413598 -----  
EPI\_ISL\_413599 -----  
EPI\_ISL\_413600 -----  
EPI\_ISL\_413601 -----  
EPI\_ISL\_424217 -----  
EPI\_ISL\_424218 -----  
EPI\_ISL\_424220 -----  
EPI\_ISL\_424232 -----  
EPI\_ISL\_424266 -----  
EPI\_ISL\_424272 -----  
EPI\_ISL\_424283 -----  
EPI\_ISL\_424288 -----  
EPI\_ISL\_424292 -----  
EPI\_ISL\_424295 -----  
EPI\_ISL\_426882 -----

ORF1ab 6961 LGGSVAIKITEHSWNADLYKLMGHFAWWTAFVTNVNASSSEAFILGICNYLGKPREQIDGY  
EPI\_ISL\_413594 -----  
EPI\_ISL\_413595 -----  
EPI\_ISL\_413596 -----  
EPI\_ISL\_413597 -----  
EPI\_ISL\_413598 -----  
EPI\_ISL\_413599 -----  
EPI\_ISL\_413600 -----  
EPI\_ISL\_413601 -----  
EPI\_ISL\_424217 -----  
EPI\_ISL\_424218 -----  
EPI\_ISL\_424220 -----  
EPI\_ISL\_424232 -----  
EPI\_ISL\_424266 -----  
EPI\_ISL\_424272 -----  
EPI\_ISL\_424283 -----  
EPI\_ISL\_424288 -----  
EPI\_ISL\_424292 -----  
EPI\_ISL\_424295 -----  
EPI\_ISL\_426882 -----

ORFlab 7021 VMHANYIFWRNTNPIQLSSYSLFDMASKFPLKLRGTAVMSLKEGQINDMILSLLSKGRLII  
EPI\_ISL\_413594 -----  
EPI\_ISL\_413595 -----  
EPI\_ISL\_413596 -----  
EPI\_ISL\_413597 -----  
EPI\_ISL\_413598 -----  
EPI\_ISL\_413599 -----  
EPI\_ISL\_413600 -----  
EPI\_ISL\_413601 -----  
EPI\_ISL\_424217 -----  
EPI\_ISL\_424218 -----  
EPI\_ISL\_424220 -----  
EPI\_ISL\_424232 -----  
EPI\_ISL\_424266 -----  
EPI\_ISL\_424272 -----  
EPI\_ISL\_424283 -----  
EPI\_ISL\_424288 -----  
EPI\_ISL\_424292 -----  
EPI\_ISL\_424295 -----  
EPI\_ISL\_426882 -----

ORFlab 7081 RENNRRVVISSDVLVNN  
EPI\_ISL\_413594 -----  
EPI\_ISL\_413595 -----  
EPI\_ISL\_413596 -----  
EPI\_ISL\_413597 -----  
EPI\_ISL\_413598 -----  
EPI\_ISL\_413599 -----  
EPI\_ISL\_413600 -----  
EPI\_ISL\_413601 -----  
EPI\_ISL\_424217 -----  
EPI\_ISL\_424218 -----  
EPI\_ISL\_424220 -----  
EPI\_ISL\_424232 -----  
EPI\_ISL\_424266 -----  
EPI\_ISL\_424272 -----  
EPI\_ISL\_424283 -----  
EPI\_ISL\_424288 -----  
EPI\_ISL\_424292 -----  
EPI\_ISL\_424295 -----  
EPI\_ISL\_426882 -----

# Clade S

ORFlab 1 MESLVPGFNEKTHVQLSLPVLQVRDVLVRGFGDSVEEVLSERQHLKDGTCGLVEVEKGV  
EPI\_ISL\_424219 1 -----  
EPI\_ISL\_424222 1 -----  
EPI\_ISL\_424223 1 -----  
EPI\_ISL\_424226 1 -----  
EPI\_ISL\_424228 1 -----  
EPI\_ISL\_424230 1 -----  
EPI\_ISL\_424231 1 -----  
EPI\_ISL\_424240 1 -----  
EPI\_ISL\_424241 1 -----  
EPI\_ISL\_424243 1 -----  
EPI\_ISL\_424247 1 -----  
EPI\_ISL\_424249 1 -----  
EPI\_ISL\_424250 1 -----  
EPI\_ISL\_424252 1 -----  
EPI\_ISL\_424258 1 -----  
EPI\_ISL\_424268 1 -----  
EPI\_ISL\_424269 1 -----  
EPI\_ISL\_424275 1 -----  
EPI\_ISL\_424276 1 -----  
EPI\_ISL\_424279 1 -----

ORFlab 61 LPQLEQPYVFIKRSDARTAPHGHVMVELVAELEGIQYGRSGETLGVLPVHVGEIPVAYRK  
EPI\_ISL\_424219 1 -----  
EPI\_ISL\_424222 1 -----  
EPI\_ISL\_424223 1 -----  
EPI\_ISL\_424226 1 -----  
EPI\_ISL\_424228 1 -----  
EPI\_ISL\_424230 1 -----  
EPI\_ISL\_424231 1 -----  
EPI\_ISL\_424240 1 -----  
EPI\_ISL\_424241 1 -----  
EPI\_ISL\_424243 1 -----  
EPI\_ISL\_424247 1 -----  
EPI\_ISL\_424249 1 -----  
EPI\_ISL\_424250 1 -----  
EPI\_ISL\_424252 1 -----  
EPI\_ISL\_424258 1 -----  
EPI\_ISL\_424268 1 -----  
EPI\_ISL\_424269 1 -----  
EPI\_ISL\_424275 1 -----  
EPI\_ISL\_424276 1 -----  
EPI\_ISL\_424279 1 -----

ORFlab 121 VLLRKNGNKGAGGHSYGADLKSFDLGDDELGTDPYEDFQENWNTKHSSGVTRELMRELNGG  
EPI\_ISL\_424219 1 -----  
EPI\_ISL\_424222 1 -----  
EPI\_ISL\_424223 1 -----  
EPI\_ISL\_424226 1 -----  
EPI\_ISL\_424228 1 -----  
EPI\_ISL\_424230 1 -----  
EPI\_ISL\_424231 1 -----  
EPI\_ISL\_424240 1 -----  
EPI\_ISL\_424241 1 -----  
EPI\_ISL\_424243 1 -----  
EPI\_ISL\_424247 1 -----  
EPI\_ISL\_424249 1 -----  
EPI\_ISL\_424250 1 -----  
EPI\_ISL\_424252 1 -----  
EPI\_ISL\_424258 1 -----



|                |   |       |
|----------------|---|-------|
| EPI_ISL_424268 | 1 | ----- |
| EPI_ISL_424269 | 1 | ----- |
| EPI_ISL_424275 | 1 | ----- |
| EPI_ISL_424276 | 1 | ----- |
| EPI_ISL_424279 | 1 | ----- |

ORF1ab 181 AYTRYVDNNFCGPDGYPLECIKDLLARAGKASCTLSEQLDFIDTKRGVYCCREHEHEIAW  
EPI\_ISL\_424219 1 -----  
EPI\_ISL\_424222 1 -----  
EPI\_ISL\_424223 1 -----  
EPI\_ISL\_424226 1 -----  
EPI\_ISL\_424228 1 -----  
EPI\_ISL\_424230 1 -----  
EPI\_ISL\_424231 1 -----  
EPI\_ISL\_424240 1 -----  
EPI\_ISL\_424241 1 -----  
EPI\_ISL\_424243 1 -----  
EPI\_ISL\_424247 1 -----  
EPI\_ISL\_424249 1 -----  
EPI\_ISL\_424250 1 -----  
EPI\_ISL\_424252 1 -----  
EPI\_ISL\_424258 1 -----  
EPI\_ISL\_424268 1 -----  
EPI\_ISL\_424269 1 -----  
EPI\_ISL\_424275 1 -----  
EPI\_ISL\_424276 1 -----  
EPI\_ISL\_424279 1 -----

ORF1ab 241 YTERSEKSYELQTPFEIKLAKKFDTFNGECPNFVFPPLNSIIKTIQPRVEKKKLDGFMGRI  
EPI\_ISL\_424219 1 -----  
EPI\_ISL\_424222 1 -----  
EPI\_ISL\_424223 1 -----  
EPI\_ISL\_424226 1 -----  
EPI\_ISL\_424228 1 -----  
EPI\_ISL\_424230 1 -----  
EPI\_ISL\_424231 1 -----  
EPI\_ISL\_424240 1 -----  
EPI\_ISL\_424241 1 -----  
EPI\_ISL\_424243 1 -----  
EPI\_ISL\_424247 1 -----  
EPI\_ISL\_424249 1 -----  
EPI\_ISL\_424250 1 -----  
EPI\_ISL\_424252 1 -----  
EPI\_ISL\_424258 1 -----  
EPI\_ISL\_424268 1 -----  
EPI\_ISL\_424269 1 -----  
EPI\_ISL\_424275 1 -----  
EPI\_ISL\_424276 1 -----  
EPI\_ISL\_424279 1 -----

ORF1ab 301 RSVYPVASPNECNQMCLSTLMKCDHCGETSWQTGDFVKATCEFCGTENLTKEGATTCGYL  
EPI\_ISL\_424219 1 -----  
EPI\_ISL\_424222 1 -----  
EPI\_ISL\_424223 1 -----  
EPI\_ISL\_424226 1 -----  
EPI\_ISL\_424228 1 -----  
EPI\_ISL\_424230 1 -----  
EPI\_ISL\_424231 1 -----  
EPI\_ISL\_424240 1 -----  
EPI\_ISL\_424241 1 -----  
EPI\_ISL\_424243 1 -----  
EPI\_ISL\_424247 1 -----  
EPI\_ISL\_424249 1 -----  
EPI\_ISL\_424250 1 -----  
EPI\_ISL\_424252 1 -----  
EPI\_ISL\_424258 1 -----  
EPI\_ISL\_424268 1 -----  
EPI\_ISL\_424269 1 -----  
EPI\_ISL\_424275 1 -----  
EPI\_ISL\_424276 1 -----



ORF1ab 361 PQNAVVKIYCPACHNSEVGPESHSLAEYHNESGLKTIILRKGGRRTIAFGGCVFSYVGCHNKC  
EPI\_ISL\_424219 1 -----  
EPI\_ISL\_424222 1 -----  
EPI\_ISL\_424223 1 -----  
EPI\_ISL\_424226 1 -----  
EPI\_ISL\_424228 1 -----  
EPI\_ISL\_424230 1 -----  
EPI\_ISL\_424231 1 -----  
EPI\_ISL\_424240 1 -----  
EPI\_ISL\_424241 1 -----  
EPI\_ISL\_424243 1 -----  
EPI\_ISL\_424247 1 -----  
EPI\_ISL\_424249 1 -----  
EPI\_ISL\_424250 1 -----  
EPI\_ISL\_424252 1 -----  
EPI\_ISL\_424258 1 -----  
EPI\_ISL\_424268 1 -----  
EPI\_ISL\_424269 1 -----  
EPI\_ISL\_424275 1 -----  
EPI\_ISL\_424276 1 -----  
EPI\_ISL\_424279 1 -----

ORF1ab 421 AYWVPRASANIGCNHTGVVGESEGLNDNLLEILQKEKVNINIVGDFKLNEEIAIILASF  
EPI\_ISL\_424219 1 -----  
EPI\_ISL\_424222 1 -----  
EPI\_ISL\_424223 1 -----  
EPI\_ISL\_424226 1 -----  
EPI\_ISL\_424228 1 -----  
EPI\_ISL\_424230 1 -----  
EPI\_ISL\_424231 1 -----  
EPI\_ISL\_424240 1 -----  
EPI\_ISL\_424241 1 -----  
EPI\_ISL\_424243 1 -----  
EPI\_ISL\_424247 1 -----  
EPI\_ISL\_424249 1 -----  
EPI\_ISL\_424250 1 -----  
EPI\_ISL\_424252 1 -----  
EPI\_ISL\_424258 1 -----  
EPI\_ISL\_424268 1 -----  
EPI\_ISL\_424269 1 -----  
EPI\_ISL\_424275 1 -----  
EPI\_ISL\_424276 1 -----  
EPI\_ISL\_424279 1 -----

ORF1ab 481 SASTSAFVETVKGLDYKAFKQIVESCGNFKVTKGKAKKGAWNIGEQKSILSPLYAFASEA  
EPI\_ISL\_424219 1 -----  
EPI\_ISL\_424222 1 -----  
EPI\_ISL\_424223 1 -----  
EPI\_ISL\_424226 1 -----  
EPI\_ISL\_424228 1 -----  
EPI\_ISL\_424230 1 -----  
EPI\_ISL\_424231 1 -----  
EPI\_ISL\_424240 1 -----  
EPI\_ISL\_424241 1 -----  
EPI\_ISL\_424243 1 -----  
EPI\_ISL\_424247 1 -----  
EPI\_ISL\_424249 1 -----  
EPI\_ISL\_424250 1 -----  
EPI\_ISL\_424252 1 -----  
EPI\_ISL\_424258 1 -----  
EPI\_ISL\_424268 1 -----  
EPI\_ISL\_424269 1 -----  
EPI\_ISL\_424275 1 -----  
EPI\_ISL\_424276 1 -----



ORF1ab 541 ARVVRSIFSRTLETAQNSVRVLQKAAITILDGISQYSLRLIDAMMFTSDLATNNLVVMAY  
EPI\_ISL\_424219 1 -----  
EPI\_ISL\_424222 1 -----  
EPI\_ISL\_424223 1 -----  
EPI\_ISL\_424226 1 -----  
EPI\_ISL\_424228 1 -----  
EPI\_ISL\_424230 1 -----  
EPI\_ISL\_424231 1 -----  
EPI\_ISL\_424240 1 -----  
EPI\_ISL\_424241 1 -----  
EPI\_ISL\_424243 1 -----  
EPI\_ISL\_424247 1 -----  
EPI\_ISL\_424249 1 -----  
EPI\_ISL\_424250 1 -----  
EPI\_ISL\_424252 1 -----  
EPI\_ISL\_424258 1 -----  
EPI\_ISL\_424268 1 -----  
EPI\_ISL\_424269 1 -----  
EPI\_ISL\_424275 1 -----  
EPI\_ISL\_424276 1 -----  
EPI\_ISL\_424279 1 -----

ORF1ab 601 ITGGVVQLTSQWLTNIFGTVYEKLPVLDWLEEKFKEGVEFLRDGWEIVKFI STCACEIV  
EPI\_ISL\_424219 1 -----  
EPI\_ISL\_424222 1 -----  
EPI\_ISL\_424223 1 -----  
EPI\_ISL\_424226 1 -----  
EPI\_ISL\_424228 1 -----  
EPI\_ISL\_424230 1 -----  
EPI\_ISL\_424231 1 -----  
EPI\_ISL\_424240 1 -----  
EPI\_ISL\_424241 1 -----  
EPI\_ISL\_424243 1 -----  
EPI\_ISL\_424247 1 -----  
EPI\_ISL\_424249 1 -----  
EPI\_ISL\_424250 1 -----  
EPI\_ISL\_424252 1 -----  
EPI\_ISL\_424258 1 -----  
EPI\_ISL\_424268 1 -----  
EPI\_ISL\_424269 1 -----  
EPI\_ISL\_424275 1 -----  
EPI\_ISL\_424276 1 -----  
EPI\_ISL\_424279 1 -----

ORF1ab 661 GGQIVTCAKEIKESVQTFKLVNKFLALCADSIIIGGAKLKALNLGETFVTHSKGLYRKC  
EPI\_ISL\_424219 1 -----  
EPI\_ISL\_424222 1 -----  
EPI\_ISL\_424223 1 -----  
EPI\_ISL\_424226 1 -----  
EPI\_ISL\_424228 1 -----  
EPI\_ISL\_424230 1 -----  
EPI\_ISL\_424231 1 -----  
EPI\_ISL\_424240 1 -----  
EPI\_ISL\_424241 1 -----  
EPI\_ISL\_424243 1 -----  
EPI\_ISL\_424247 1 -----  
EPI\_ISL\_424249 1 -----  
EPI\_ISL\_424250 1 -----  
EPI\_ISL\_424252 1 -----  
EPI\_ISL\_424258 1 -----  
EPI\_ISL\_424268 1 -----  
EPI\_ISL\_424269 1 -----  
EPI\_ISL\_424275 1 -----  
EPI\_ISL\_424276 1 -----



ORF1ab 721 VKSREETGLLMPLKAPKEIIFLEGETLPTEVLTEEVVLKTGDLQPLEQPTSEAVEAPLVG  
 EPI\_ISL\_424219 1 -----  
 EPI\_ISL\_424222 1 -----  
 EPI\_ISL\_424223 1 -----  
 EPI\_ISL\_424226 1 -----  
 EPI\_ISL\_424228 1 -----  
 EPI\_ISL\_424230 1 -----  
 EPI\_ISL\_424231 1 -----  
 EPI\_ISL\_424240 1 -----  
 EPI\_ISL\_424241 1 -----  
 EPI\_ISL\_424243 1 -----  
 EPI\_ISL\_424247 1 -----  
 EPI\_ISL\_424249 1 -----  
 EPI\_ISL\_424250 1 -----  
 EPI\_ISL\_424252 1 -----  
 EPI\_ISL\_424258 1 -----  
 EPI\_ISL\_424268 1 -----  
 EPI\_ISL\_424269 1 -----  
 EPI\_ISL\_424275 1 -----  
 EPI\_ISL\_424276 1 -----  
 EPI\_ISL\_424279 1 -----

ORF1ab 781 TPVCINGLMLEIKDTEKYCALAPNMMVTNNTFTLKGGAPTKVTFGDDTVIEVQGYKSVN  
 EPI\_ISL\_424219 1 -----APTKVTFGDDTVIEVQGYKSVN  
 EPI\_ISL\_424222 1 -----APTKVTFGDDTVIEVQGYKSVN  
 EPI\_ISL\_424223 1 -----APTKVTFGDDTVIEVQGYKSVN  
 EPI\_ISL\_424226 1 -----APTKVTFGDDTVIEVQGYKSVN  
 EPI\_ISL\_424228 1 -----APTKVTFGDDTVIEVQGYKSVN  
 EPI\_ISL\_424230 1 -----APTKVTFGDDTVIEVQGYKSVN  
 EPI\_ISL\_424231 1 -----APTKVTFGDDTVIEVQGYKSVN  
 EPI\_ISL\_424240 1 -----APTKVTFGDDTVIEVQGYKSVN  
 EPI\_ISL\_424241 1 -----APTKVTFGDDTVIEVQGYKSVN  
 EPI\_ISL\_424243 1 -----APTKVTFGDDTVIEVQGYKSVN  
 EPI\_ISL\_424247 1 -----APTKVTFGDDTVIEVQGYKSVN  
 EPI\_ISL\_424249 1 -----APTKVTFGDDTVIEVQGYKSVN  
 EPI\_ISL\_424250 1 -----APTKVTFGDDTVIEVQGYKSVN  
 EPI\_ISL\_424252 1 -----APTKVTFGDDTVIEVQGYKSVN  
 EPI\_ISL\_424258 1 -----APTKVTFGDDTVIEVQGYKSVN  
 EPI\_ISL\_424268 1 -----APTKVTFGDDTVIEVQGYKSVN  
 EPI\_ISL\_424269 1 -----APTKVTFGDDTVIEVQGYKSVN  
 EPI\_ISL\_424275 1 -----APTKVTFGDDTVIEVQGYKSVN  
 EPI\_ISL\_424276 1 -----APTKVTFGDDTVIEVQGYKSVN  
 EPI\_ISL\_424279 1 -----APTKVTFGDDTVIEVQGYKSVN

ORF1ab 841 ITFELDERIDKVLNEKCSAYTVELGTEVNEFACVVADAVIKTLQPVSELLTPLGIDLDEW  
 EPI\_ISL\_424219 23 ITFELDERIDKVLNEKCSAYTVELGTEVNEFACVVADAVIKTLQPVSELLTPLGIDLDEW  
 EPI\_ISL\_424222 23 ITFELDERIDKVLNEKCSAYTVELGTEVNEFACVVADAVIKTLQPVSELLTPLGIDLDEW  
 EPI\_ISL\_424223 23 ITFELDERIDKVLNEKCSAYTVELGTEVNEFACVVADAVIKTLQPVSELLTPLGIDLDEW  
 EPI\_ISL\_424226 23 ITFELDERIDKVLNEKCSAYTVELGTEVNEFACVVADAVIKTLQPVSELLTPLGIDLDEW  
 EPI\_ISL\_424228 23 ITFELDERIDKVLNEKCSAYTVELGTEVNEFACVVADAVIKTLQPVSELLTPLGIDLDEW  
 EPI\_ISL\_424230 23 ITFELDERIDKVLNEKCSAYTVELGTEVNEFACVVADAVIKTLQPVSELLTPLGIDLDEW  
 EPI\_ISL\_424231 23 ITFELDERIDKVLNEKCSAYTVELGTEVNEFACVVADAVIKTLQPVSELLTPLGIDLDEW  
 EPI\_ISL\_424240 23 ITFELDERIDKVLNEKCSAYTVELGTEVNEFACVVADAVIKTLQPVSELLTPLGIDLDEW  
 EPI\_ISL\_424241 23 ITFELDERIDKVLNEKCSAYTVELGTEVNEFACVVADAVIKTLQPVSELLTPLGIDLDEW  
 EPI\_ISL\_424243 23 ITFELDERIDKVLNEKCSAYTVELGTEVNEFACVVADAVIKTLQPVSELLTPLGIDLDEW  
 EPI\_ISL\_424247 23 ITFELDERIDKVLNEKCSAYTVELGTEVNEFACVVADAVIKTLQPVSELLTPLGIDLDEW  
 EPI\_ISL\_424249 23 ITFELDERIDKVLNEKCSAYTVELGTEVNEFACVVADAVIKTLQPVSELLTPLGIDLDEW  
 EPI\_ISL\_424250 23 ITFELDERIDKVLNEKCSAYTVELGTEVNEFACVVADAVIKTLQPVSELLTPLGIDLDEW  
 EPI\_ISL\_424252 23 ITFELDERIDKVLNEKCSAYTVELGTEVNEFACVVADAVIKTLQPVSELLTPLGIDLDEW  
 EPI\_ISL\_424258 23 ITFELDERIDKVLNEKCSAYTVELGTEVNEFACVVADAVIKTLQPVSELLTPLGIDLDEW  
 EPI\_ISL\_424268 23 ITFELDERIDKVLNEKCSAYTVELGTEVNEFACVVADAVIKTLQPVSELLTPLGIDLDEW  
 EPI\_ISL\_424269 23 ITFELDERIDKVLNEKCSAYTVELGTEVNEFACVVADAVIKTLQPVSELLTPLGIDLDEW  
 EPI\_ISL\_424275 23 ITFELDERIDKVLNEKCSAYTVELGTEVNEFACVVADAVIKTLQPVSELLTPLGIDLDEW  
 EPI\_ISL\_424276 23 ITFELDERIDKVLNEKCSAYTVELGTEVNEFACVVADAVIKTLQPVSELLTPLGIDLDEW







EPI\_ISL\_424279 203 QTIEVNSFSGYLKLTDNVYIKNADIVEEAKKVKPTVVVNAANVYLKHGGGVAGALNKATN



EPI\_ISL\_424279 383 QKIAEIPKEEVKPFITESKPSVEQRKQDDKKIKACVEEVTTTLEETKFLTENLLLYIDIN



EPI\_ISL\_424279 563 HAEETRKLMPVCVETKAIVSTIQRKYKGIKIQEGVVDYGARFYFYTSKTTVASLINTLND





EPI\_ISL\_424279 743

SLREVRTIKVFTTVDNINLHTQVVDMSMTYGQQFGPTYLDGADVTKIKPHNSHEGKTFYV



EPI\_ISL\_424279 923

LDSCRVLNVVCKTCGQQQTTLKGVEAVMYMGTLSEYQFKKGVQIPCTCGKQATKYLQQ



EPI\_ISL\_424279 1103 PNASFDNFKFVCDNIKFADDLNQLTGYKKPASRELKVTFFPDLNGDVVAIDYKHYTPSK



EPI\_ISL\_424279 1283 **DNSSLTIKKPNELSRVLGLKTLATHGLAAVNSVPWDTIANYAKPFLNKVVSTTTNIVTRC**





EPI\_ISL\_424279 1463 YCTGSIPCSVCLSGLDSDLTYPSELETIQITISSFKWDLTAFGLVAEWFLAYILFTRFFYV



EPI\_ISL\_424279 1643 **GSTFISDEVARDLSLQFKRPINPTDQSSYIVDSVTVKNGSIHLYFDKAGQKTYERHSLSH**



EPI\_ISL\_424279 1823

FVDSDVETKDVVECLKLSHQSDIEVTGDSCNNYMLTYNKVENMTPRDLGACIDCSARHIN

|                |      |                                                              |
|----------------|------|--------------------------------------------------------------|
| ORF1ab         | 2701 | AQVAKSHNIALIWNVKDFMSLSEQLRKQIRSAAKKNNLPFKLTCATTRQVVNVVTTKIAL |
| EPI_ISL_424219 | 1883 | AQVAKSHNIALIWNVKDFMSLSEQLRKQIRSAAKKNNLPFKLTCATTRQVVNVVTTKIAL |
| EPI_ISL_424222 | 1883 | AQVAKSHNIALIWNVKDFMSLSEQLRKQIRSAAKKNNLPFKLTCATTRQVVNVVTTKIAL |
| EPI_ISL_424223 | 1883 | AQVAKSHNIALIWNVKDFMSLSEQLRKQIRSAAKKNNLPFKLTCATTRQVVNVVTTKIAL |
| EPI_ISL_424226 | 1883 | AQVAKSHNIALIWNVKDFMSLSEQLRKQIRSAAKKNNLPFKLTCATTRQVVNVVTTKIAL |
| EPI_ISL_424228 | 1883 | AQVAKSHNIALIWNVKDFMSLSEQLRKQIRSAAKKNNLPFKLTCATTRQVVNVVTTKIAL |
| EPI_ISL_424230 | 1883 | AQVAKSHNIALIWNVKDFMSLSEQLRKQIRSAAKKNNLPFKLTCATTRQVVNVVTTKIAL |
| EPI_ISL_424231 | 1883 | AQVAKSHNIALIWNVKDFMSLSEQLRKQIRSAAKKNNLPFKLTCATTRQVVNVVTTKIAL |
| EPI_ISL_424240 | 1883 | AQVAKSHNIALIWNVKDFMSLSEQLRKQIRSAAKKNNLPFKLTCATTRQVVNVVTTKIAL |
| EPI_ISL_424241 | 1883 | AQVAKSHNIALIWNVKDFMSLSEQLRKQIRSAAKKNNLPFKLTCATTRQVVNVVTTKIAL |
| EPI_ISL_424243 | 1883 | AQVAKSHNIALIWNVKDFMSLSEQLRKQIRSAAKKNNLPFKLTCATTRQVVNVVTTKIAL |
| EPI_ISL_424247 | 1883 | AQVAKSHNIALIWNVKDFMSLSEQLRKQIRSAAKKNNLPFKLTCATTRQVVNVVTTKIAL |
| EPI_ISL_424249 | 1883 | AQVAKSHNIALIWNVKDFMSLSEQLRKQIRSAAKKNNLPFKLTCATTRQVVNVVTTKIAL |
| EPI_ISL_424250 | 1883 | AQVAKSHNIALIWNVKDFMSLSEQLRKQIRSAAKKNNLPFKLTCATTRQVVNVVTTKIAL |
| EPI_ISL_424252 | 1883 | AQVAKSHNIALIWNVKDFMSLSEQLRKQIRSAAKKNNLPFKLTCATTRQVVNVVTTKIAL |
| EPI_ISL_424258 | 1883 | AQVAKSHNIALIWNVKDFMSLSEQLRKQIRSAAKKNNLPFKLTCATTRQVVNVVTTKIAL |
| EPI_ISL_424268 | 1883 | AQVAKSHNIALIWNVKDFMSLSEQLRKQIRSAAKKNNLPFKLTCATTRQVVNVVTTKIAL |
| EPI_ISL_424269 | 1883 | AQVAKSHNIALIWNVKDFMSLSEQLRKQIRSAAKKNNLPFKLTCATTRQVVNVVTTKIAL |
| EPI_ISL_424275 | 1883 | AQVAKSHNIALIWNVKDFMSLSEQLRKQIRSAAKKNNLPFKLTCATTRQVVNVVTTKIAL |
| EPI_ISL_424276 | 1883 | AQVAKSHNIALIWNVKDFMSLSEQLRKQIRSAAKKNNLPFKLTCATTRQVVNVVTTKIAL |
| EPI_ISL_424279 | 1883 | AQVAKSHNIALIWNVKDFMSLSEQLRKQIRSAAKKNNLPFKLTCATTRQVVNVVTTKIAL |

|                |      |                                                              |
|----------------|------|--------------------------------------------------------------|
| ORF1ab         | 2761 | KGGKIVNNWLKQLIKVTLVFLFVAAIFYLITPVHVMKHTDFSSSEIIGYKAIDGGVTRDI |
| EPI_ISL_424219 | 1943 | KGG-----                                                     |
| EPI_ISL_424222 | 1943 | KGG-----                                                     |
| EPI_ISL_424223 | 1943 | KGG-----                                                     |
| EPI_ISL_424226 | 1943 | KGG-----                                                     |
| EPI_ISL_424228 | 1943 | KGG-----                                                     |
| EPI_ISL_424230 | 1943 | KGG-----                                                     |
| EPI_ISL_424231 | 1943 | KGG-----                                                     |
| EPI_ISL_424240 | 1943 | KGG-----                                                     |
| EPI_ISL_424241 | 1943 | KGG-----                                                     |
| EPI_ISL_424243 | 1943 | KGG-----                                                     |
| EPI_ISL_424247 | 1943 | KGG-----                                                     |
| EPI_ISL_424249 | 1943 | KGG-----                                                     |
| EPI_ISL_424250 | 1943 | KGG-----                                                     |
| EPI_ISL_424252 | 1943 | KGG-----                                                     |
| EPI_ISL_424258 | 1943 | KGG-----                                                     |
| EPI_ISL_424268 | 1943 | KGG-----                                                     |
| EPI_ISL_424269 | 1943 | KGG-----                                                     |
| EPI_ISL_424275 | 1943 | KGG-----                                                     |
| EPI_ISL_424276 | 1943 | KGG-----                                                     |
| EPI_ISL_424279 | 1943 | KGG-----                                                     |

|                |      |                                                               |
|----------------|------|---------------------------------------------------------------|
| ORF1ab         | 2821 | ASTDTCFANKHADFDTWFSQRGGSYTNDKACPLIAAVITREVG FVVPGLPGTILRTTNGD |
| EPI_ISL_424219 |      | -----                                                         |
| EPI_ISL_424222 |      | -----                                                         |
| EPI_ISL_424223 |      | -----                                                         |
| EPI_ISL_424226 |      | -----                                                         |
| EPI_ISL_424228 |      | -----                                                         |
| EPI_ISL_424230 |      | -----                                                         |
| EPI_ISL_424231 |      | -----                                                         |
| EPI_ISL_424240 |      | -----                                                         |
| EPI_ISL_424241 |      | -----                                                         |
| EPI_ISL_424243 |      | -----                                                         |
| EPI_ISL_424247 |      | -----                                                         |
| EPI_ISL_424249 |      | -----                                                         |
| EPI_ISL_424250 |      | -----                                                         |
| EPI_ISL_424252 |      | -----                                                         |
| EPI_ISL_424258 |      | -----                                                         |
| EPI_ISL_424268 |      | -----                                                         |
| EPI_ISL_424269 |      | -----                                                         |
| EPI_ISL_424275 |      | -----                                                         |
| EPI_ISL_424276 |      | -----                                                         |



ORF1ab 2881 FLHFLPRVFSAVGNICYTPSKLIEYTD FATSACVLA AECTIFK DASGKPV PYCYDTNVLE  
EPI\_ISL\_424219 -----  
EPI\_ISL\_424222 -----  
EPI\_ISL\_424223 -----  
EPI\_ISL\_424226 -----  
EPI\_ISL\_424228 -----  
EPI\_ISL\_424230 -----  
EPI\_ISL\_424231 -----  
EPI\_ISL\_424240 -----  
EPI\_ISL\_424241 -----  
EPI\_ISL\_424243 -----  
EPI\_ISL\_424247 -----  
EPI\_ISL\_424249 -----  
EPI\_ISL\_424250 -----  
EPI\_ISL\_424252 -----  
EPI\_ISL\_424258 -----  
EPI\_ISL\_424268 -----  
EPI\_ISL\_424269 -----  
EPI\_ISL\_424275 -----  
EPI\_ISL\_424276 -----  
EPI\_ISL\_424279 -----

ORF1ab 2941 GSVAYESLRPDTRYV LMDGSI IQFPNTYLEG SVRVVTTFDSEYCRHGT CERSEAGVCVST  
EPI\_ISL\_424219 -----  
EPI\_ISL\_424222 -----  
EPI\_ISL\_424223 -----  
EPI\_ISL\_424226 -----  
EPI\_ISL\_424228 -----  
EPI\_ISL\_424230 -----  
EPI\_ISL\_424231 -----  
EPI\_ISL\_424240 -----  
EPI\_ISL\_424241 -----  
EPI\_ISL\_424243 -----  
EPI\_ISL\_424247 -----  
EPI\_ISL\_424249 -----  
EPI\_ISL\_424250 -----  
EPI\_ISL\_424252 -----  
EPI\_ISL\_424258 -----  
EPI\_ISL\_424268 -----  
EPI\_ISL\_424269 -----  
EPI\_ISL\_424275 -----  
EPI\_ISL\_424276 -----  
EPI\_ISL\_424279 -----

ORF1ab 3001 SGRWVLNNDYYRSLPGVFCGVDAVNLLTNMFTPLIQPIGALDISASIVAGGIVAIIVVTCL  
EPI\_ISL\_424219 -----  
EPI\_ISL\_424222 -----  
EPI\_ISL\_424223 -----  
EPI\_ISL\_424226 -----  
EPI\_ISL\_424228 -----  
EPI\_ISL\_424230 -----  
EPI\_ISL\_424231 -----  
EPI\_ISL\_424240 -----  
EPI\_ISL\_424241 -----  
EPI\_ISL\_424243 -----  
EPI\_ISL\_424247 -----  
EPI\_ISL\_424249 -----  
EPI\_ISL\_424250 -----  
EPI\_ISL\_424252 -----  
EPI\_ISL\_424258 -----  
EPI\_ISL\_424268 -----  
EPI\_ISL\_424269 -----  
EPI\_ISL\_424275 -----  
EPI\_ISL\_424276 -----





ORF1ab 3061 AYYFMRFRRAFGEYSHVVAFNNTLLFLMSFTVLCLTPVYSFLPGVYSVIYLYLTFYLTNDV  
EPI\_ISL\_424219 -----  
EPI\_ISL\_424222 -----  
EPI\_ISL\_424223 -----  
EPI\_ISL\_424226 -----  
EPI\_ISL\_424228 -----  
EPI\_ISL\_424230 -----  
EPI\_ISL\_424231 -----  
EPI\_ISL\_424240 -----  
EPI\_ISL\_424241 -----  
EPI\_ISL\_424243 -----  
EPI\_ISL\_424247 -----  
EPI\_ISL\_424249 -----  
EPI\_ISL\_424250 -----  
EPI\_ISL\_424252 -----  
EPI\_ISL\_424258 -----  
EPI\_ISL\_424268 -----  
EPI\_ISL\_424269 -----  
EPI\_ISL\_424275 -----  
EPI\_ISL\_424276 -----  
EPI\_ISL\_424279 -----

ORF1ab 3121 SFLAHIQWMVMFTPLVPFWITIAIYIICISTKHFWFFSNYLKRRVVFNGVSFSTFEEAAL  
EPI\_ISL\_424219 -----  
EPI\_ISL\_424222 -----  
EPI\_ISL\_424223 -----  
EPI\_ISL\_424226 -----  
EPI\_ISL\_424228 -----  
EPI\_ISL\_424230 -----  
EPI\_ISL\_424231 -----  
EPI\_ISL\_424240 -----  
EPI\_ISL\_424241 -----  
EPI\_ISL\_424243 -----  
EPI\_ISL\_424247 -----  
EPI\_ISL\_424249 -----  
EPI\_ISL\_424250 -----  
EPI\_ISL\_424252 -----  
EPI\_ISL\_424258 -----  
EPI\_ISL\_424268 -----  
EPI\_ISL\_424269 -----  
EPI\_ISL\_424275 -----  
EPI\_ISL\_424276 -----  
EPI\_ISL\_424279 -----

ORF1ab 3181 CTFLLNKEMYLKLRSDVLLPLTQYNRYLALYNKYKYFSGAMDTTSYREAACCHLAKALND  
EPI\_ISL\_424219 -----  
EPI\_ISL\_424222 -----  
EPI\_ISL\_424223 -----  
EPI\_ISL\_424226 -----  
EPI\_ISL\_424228 -----  
EPI\_ISL\_424230 -----  
EPI\_ISL\_424231 -----  
EPI\_ISL\_424240 -----  
EPI\_ISL\_424241 -----  
EPI\_ISL\_424243 -----  
EPI\_ISL\_424247 -----  
EPI\_ISL\_424249 -----  
EPI\_ISL\_424250 -----  
EPI\_ISL\_424252 -----  
EPI\_ISL\_424258 -----  
EPI\_ISL\_424268 -----  
EPI\_ISL\_424269 -----  
EPI\_ISL\_424275 -----  
EPI\_ISL\_424276 -----



ORF1ab 3241 FSNSGSDVLYQPPQTSITSAVLQSGFRKMAFPSGKVEGCMVQVTCGTTTTLNLGLWLDVVY  
EPI\_ISL\_424219 -----  
EPI\_ISL\_424222 -----  
EPI\_ISL\_424223 -----  
EPI\_ISL\_424226 -----  
EPI\_ISL\_424228 -----  
EPI\_ISL\_424230 -----  
EPI\_ISL\_424231 -----  
EPI\_ISL\_424240 -----  
EPI\_ISL\_424241 -----  
EPI\_ISL\_424243 -----  
EPI\_ISL\_424247 -----  
EPI\_ISL\_424249 -----  
EPI\_ISL\_424250 -----  
EPI\_ISL\_424252 -----  
EPI\_ISL\_424258 -----  
EPI\_ISL\_424268 -----  
EPI\_ISL\_424269 -----  
EPI\_ISL\_424275 -----  
EPI\_ISL\_424276 -----  
EPI\_ISL\_424279 -----

ORF1ab 3301 CPRHVICTSEDMLNPNYEDLLIRKSNHNFLVQAGNVQLRVIGHSMQNCVCLKKVDNANPK  
EPI\_ISL\_424219 -----  
EPI\_ISL\_424222 -----  
EPI\_ISL\_424223 -----  
EPI\_ISL\_424226 -----  
EPI\_ISL\_424228 -----  
EPI\_ISL\_424230 -----  
EPI\_ISL\_424231 -----  
EPI\_ISL\_424240 -----  
EPI\_ISL\_424241 -----  
EPI\_ISL\_424243 -----  
EPI\_ISL\_424247 -----  
EPI\_ISL\_424249 -----  
EPI\_ISL\_424250 -----  
EPI\_ISL\_424252 -----  
EPI\_ISL\_424258 -----  
EPI\_ISL\_424268 -----  
EPI\_ISL\_424269 -----  
EPI\_ISL\_424275 -----  
EPI\_ISL\_424276 -----  
EPI\_ISL\_424279 -----

ORF1ab 3361 TPKYKFVRIQPGQTFVSLACYNGSPSGVYQCAMRPNFTIKGSFLNGSCGSGVGFNIDYDCV  
EPI\_ISL\_424219 -----  
EPI\_ISL\_424222 -----  
EPI\_ISL\_424223 -----  
EPI\_ISL\_424226 -----  
EPI\_ISL\_424228 -----  
EPI\_ISL\_424230 -----  
EPI\_ISL\_424231 -----  
EPI\_ISL\_424240 -----  
EPI\_ISL\_424241 -----  
EPI\_ISL\_424243 -----  
EPI\_ISL\_424247 -----  
EPI\_ISL\_424249 -----  
EPI\_ISL\_424250 -----  
EPI\_ISL\_424252 -----  
EPI\_ISL\_424258 -----  
EPI\_ISL\_424268 -----  
EPI\_ISL\_424269 -----  
EPI\_ISL\_424275 -----  
EPI\_ISL\_424276 -----



ORF1ab 3421 SFCYMHMELPTGVHAGTDLEGNFYGPVDRQTAQAAGTDTTITVNVLAWLYAAVINGDR  
EPI\_ISL\_424219 -----  
EPI\_ISL\_424222 -----  
EPI\_ISL\_424223 -----  
EPI\_ISL\_424226 -----  
EPI\_ISL\_424228 -----  
EPI\_ISL\_424230 -----  
EPI\_ISL\_424231 -----  
EPI\_ISL\_424240 -----  
EPI\_ISL\_424241 -----  
EPI\_ISL\_424243 -----  
EPI\_ISL\_424247 -----  
EPI\_ISL\_424249 -----  
EPI\_ISL\_424250 -----  
EPI\_ISL\_424252 -----  
EPI\_ISL\_424258 -----  
EPI\_ISL\_424268 -----  
EPI\_ISL\_424269 -----  
EPI\_ISL\_424275 -----  
EPI\_ISL\_424276 -----  
EPI\_ISL\_424279 -----

ORF1ab 3481 WFLNRF'TTTLNDFNLVAMKYNYEPLTQDHVDILGPLSAQTGIAVLDMCASLKELLQNGMN  
EPI\_ISL\_424219 -----  
EPI\_ISL\_424222 -----  
EPI\_ISL\_424223 -----  
EPI\_ISL\_424226 -----  
EPI\_ISL\_424228 -----  
EPI\_ISL\_424230 -----  
EPI\_ISL\_424231 -----  
EPI\_ISL\_424240 -----  
EPI\_ISL\_424241 -----  
EPI\_ISL\_424243 -----  
EPI\_ISL\_424247 -----  
EPI\_ISL\_424249 -----  
EPI\_ISL\_424250 -----  
EPI\_ISL\_424252 -----  
EPI\_ISL\_424258 -----  
EPI\_ISL\_424268 -----  
EPI\_ISL\_424269 -----  
EPI\_ISL\_424275 -----  
EPI\_ISL\_424276 -----  
EPI\_ISL\_424279 -----

ORF1ab 3541 GRTILGSALLEDEFTPFVVRQCSGVTFQSAVKRTIKGTHHWLLLLTILTSLLVLVQSTQW  
EPI\_ISL\_424219 -----  
EPI\_ISL\_424222 -----  
EPI\_ISL\_424223 -----  
EPI\_ISL\_424226 -----  
EPI\_ISL\_424228 -----  
EPI\_ISL\_424230 -----  
EPI\_ISL\_424231 -----  
EPI\_ISL\_424240 -----  
EPI\_ISL\_424241 -----  
EPI\_ISL\_424243 -----  
EPI\_ISL\_424247 -----  
EPI\_ISL\_424249 -----  
EPI\_ISL\_424250 -----  
EPI\_ISL\_424252 -----  
EPI\_ISL\_424258 -----  
EPI\_ISL\_424268 -----  
EPI\_ISL\_424269 -----  
EPI\_ISL\_424275 -----  
EPI\_ISL\_424276 -----



ORF1ab 3601 SLFFFLYENAFLPFAMGIIAMSAFAMMFVKHKHAFLLCLFLLPSSLATVAYFNMVYMPASWV  
EPI\_ISL\_424219 -----  
EPI\_ISL\_424222 -----  
EPI\_ISL\_424223 -----  
EPI\_ISL\_424226 -----  
EPI\_ISL\_424228 -----  
EPI\_ISL\_424230 -----  
EPI\_ISL\_424231 -----  
EPI\_ISL\_424240 -----  
EPI\_ISL\_424241 -----  
EPI\_ISL\_424243 -----  
EPI\_ISL\_424247 -----  
EPI\_ISL\_424249 -----  
EPI\_ISL\_424250 -----  
EPI\_ISL\_424252 -----  
EPI\_ISL\_424258 -----  
EPI\_ISL\_424268 -----  
EPI\_ISL\_424269 -----  
EPI\_ISL\_424275 -----  
EPI\_ISL\_424276 -----  
EPI\_ISL\_424279 -----

ORF1ab 3661 MRIMTWLDMVDTSLSGFKLKDCVMYASAVVLLILMTARTVYDDGARRVWTLMNVLTLVYK  
EPI\_ISL\_424219 -----  
EPI\_ISL\_424222 -----  
EPI\_ISL\_424223 -----  
EPI\_ISL\_424226 -----  
EPI\_ISL\_424228 -----  
EPI\_ISL\_424230 -----  
EPI\_ISL\_424231 -----  
EPI\_ISL\_424240 -----  
EPI\_ISL\_424241 -----  
EPI\_ISL\_424243 -----  
EPI\_ISL\_424247 -----  
EPI\_ISL\_424249 -----  
EPI\_ISL\_424250 -----  
EPI\_ISL\_424252 -----  
EPI\_ISL\_424258 -----  
EPI\_ISL\_424268 -----  
EPI\_ISL\_424269 -----  
EPI\_ISL\_424275 -----  
EPI\_ISL\_424276 -----  
EPI\_ISL\_424279 -----

ORF1ab 3721 VYIGNALDQAISMWALIIISVTSNYSQVVTVMFLARGIVFMCVEYCPPIFFITGNTLQCIM  
EPI\_ISL\_424219 -----  
EPI\_ISL\_424222 -----  
EPI\_ISL\_424223 -----  
EPI\_ISL\_424226 -----  
EPI\_ISL\_424228 -----  
EPI\_ISL\_424230 -----  
EPI\_ISL\_424231 -----  
EPI\_ISL\_424240 -----  
EPI\_ISL\_424241 -----  
EPI\_ISL\_424243 -----  
EPI\_ISL\_424247 -----  
EPI\_ISL\_424249 -----  
EPI\_ISL\_424250 -----  
EPI\_ISL\_424252 -----  
EPI\_ISL\_424258 -----  
EPI\_ISL\_424268 -----  
EPI\_ISL\_424269 -----  
EPI\_ISL\_424275 -----  
EPI\_ISL\_424276 -----





ORF1ab 3781 LVYCFLGYFCTCYFGLFCLLNRYFRLTLGVYDYLSTQEFRYMNSQGLLPPKNSIDAFKL  
EPI\_ISL\_424219 -----  
EPI\_ISL\_424222 -----  
EPI\_ISL\_424223 -----  
EPI\_ISL\_424226 -----  
EPI\_ISL\_424228 -----  
EPI\_ISL\_424230 -----  
EPI\_ISL\_424231 -----  
EPI\_ISL\_424240 -----  
EPI\_ISL\_424241 -----  
EPI\_ISL\_424243 -----  
EPI\_ISL\_424247 -----  
EPI\_ISL\_424249 -----  
EPI\_ISL\_424250 -----  
EPI\_ISL\_424252 -----  
EPI\_ISL\_424258 -----  
EPI\_ISL\_424268 -----  
EPI\_ISL\_424269 -----  
EPI\_ISL\_424275 -----  
EPI\_ISL\_424276 -----  
EPI\_ISL\_424279 -----

ORF1ab 3841 NIKLLGVGGKPCIKVATVQSKMSDVKCTSVVLLSVLQQLRVESSSKLWAQCVQLHNDILL  
EPI\_ISL\_424219 -----  
EPI\_ISL\_424222 -----  
EPI\_ISL\_424223 -----  
EPI\_ISL\_424226 -----  
EPI\_ISL\_424228 -----  
EPI\_ISL\_424230 -----  
EPI\_ISL\_424231 -----  
EPI\_ISL\_424240 -----  
EPI\_ISL\_424241 -----  
EPI\_ISL\_424243 -----  
EPI\_ISL\_424247 -----  
EPI\_ISL\_424249 -----  
EPI\_ISL\_424250 -----  
EPI\_ISL\_424252 -----  
EPI\_ISL\_424258 -----  
EPI\_ISL\_424268 -----  
EPI\_ISL\_424269 -----  
EPI\_ISL\_424275 -----  
EPI\_ISL\_424276 -----  
EPI\_ISL\_424279 -----

ORF1ab 3901 AKDTTEAFEKMSVLLSVLLSMQGAVDINKLCEEMLDNRATLQAIASEFSSLPSYAAFATA  
EPI\_ISL\_424219 -----  
EPI\_ISL\_424222 -----  
EPI\_ISL\_424223 -----  
EPI\_ISL\_424226 -----  
EPI\_ISL\_424228 -----  
EPI\_ISL\_424230 -----  
EPI\_ISL\_424231 -----  
EPI\_ISL\_424240 -----  
EPI\_ISL\_424241 -----  
EPI\_ISL\_424243 -----  
EPI\_ISL\_424247 -----  
EPI\_ISL\_424249 -----  
EPI\_ISL\_424250 -----  
EPI\_ISL\_424252 -----  
EPI\_ISL\_424258 -----  
EPI\_ISL\_424268 -----  
EPI\_ISL\_424269 -----  
EPI\_ISL\_424275 -----  
EPI\_ISL\_424276 -----



ORF1ab 3961 QEAYEQAVANGDSEVVLKLLKSLNVAKSEFDRDAAMQRKLEKMDAQAMTQMYKQARSED  
EPI\_ISL\_424219 -----  
EPI\_ISL\_424222 -----  
EPI\_ISL\_424223 -----  
EPI\_ISL\_424226 -----  
EPI\_ISL\_424228 -----  
EPI\_ISL\_424230 -----  
EPI\_ISL\_424231 -----  
EPI\_ISL\_424240 -----  
EPI\_ISL\_424241 -----  
EPI\_ISL\_424243 -----  
EPI\_ISL\_424247 -----  
EPI\_ISL\_424249 -----  
EPI\_ISL\_424250 -----  
EPI\_ISL\_424252 -----  
EPI\_ISL\_424258 -----  
EPI\_ISL\_424268 -----  
EPI\_ISL\_424269 -----  
EPI\_ISL\_424275 -----  
EPI\_ISL\_424276 -----  
EPI\_ISL\_424279 -----

ORF1ab 4021 KRAKVTSAMQTMLEFTMLRKLNDNDALNNIINNARDGCVPLNIIPLTTAAKLMVVI PDYNTY  
EPI\_ISL\_424219 -----  
EPI\_ISL\_424222 -----  
EPI\_ISL\_424223 -----  
EPI\_ISL\_424226 -----  
EPI\_ISL\_424228 -----  
EPI\_ISL\_424230 -----  
EPI\_ISL\_424231 -----  
EPI\_ISL\_424240 -----  
EPI\_ISL\_424241 -----  
EPI\_ISL\_424243 -----  
EPI\_ISL\_424247 -----  
EPI\_ISL\_424249 -----  
EPI\_ISL\_424250 -----  
EPI\_ISL\_424252 -----  
EPI\_ISL\_424258 -----  
EPI\_ISL\_424268 -----  
EPI\_ISL\_424269 -----  
EPI\_ISL\_424275 -----  
EPI\_ISL\_424276 -----  
EPI\_ISL\_424279 -----

ORF1ab 4081 KNTCDGTTFTYASALWEIQVVDADSKIVQLSEISMDNSPNLAWPLIVTALRANSVAVKLQ  
EPI\_ISL\_424219 -----  
EPI\_ISL\_424222 -----  
EPI\_ISL\_424223 -----  
EPI\_ISL\_424226 -----  
EPI\_ISL\_424228 -----  
EPI\_ISL\_424230 -----  
EPI\_ISL\_424231 -----  
EPI\_ISL\_424240 -----  
EPI\_ISL\_424241 -----  
EPI\_ISL\_424243 -----  
EPI\_ISL\_424247 -----  
EPI\_ISL\_424249 -----  
EPI\_ISL\_424250 -----  
EPI\_ISL\_424252 -----  
EPI\_ISL\_424258 -----  
EPI\_ISL\_424268 -----  
EPI\_ISL\_424269 -----  
EPI\_ISL\_424275 -----  
EPI\_ISL\_424276 -----



ORF1ab 4141 NNELSPVALRQMSCAAGTTQTACTDDNALAYNNTTKGGRFVLALLSDLQDLKWARFPKSD  
EPI\_ISL\_424219 -----  
EPI\_ISL\_424222 -----  
EPI\_ISL\_424223 -----  
EPI\_ISL\_424226 -----  
EPI\_ISL\_424228 -----  
EPI\_ISL\_424230 -----  
EPI\_ISL\_424231 -----  
EPI\_ISL\_424240 -----  
EPI\_ISL\_424241 -----  
EPI\_ISL\_424243 -----  
EPI\_ISL\_424247 -----  
EPI\_ISL\_424249 -----  
EPI\_ISL\_424250 -----  
EPI\_ISL\_424252 -----  
EPI\_ISL\_424258 -----  
EPI\_ISL\_424268 -----  
EPI\_ISL\_424269 -----  
EPI\_ISL\_424275 -----  
EPI\_ISL\_424276 -----  
EPI\_ISL\_424279 -----

ORF1ab 4201 GTGTIYTELEPPCRFVTDTPKGPVKYLYFIKGLNNLNRMVGLGSLAATVRLQAGNATEV  
EPI\_ISL\_424219 -----  
EPI\_ISL\_424222 -----  
EPI\_ISL\_424223 -----  
EPI\_ISL\_424226 -----  
EPI\_ISL\_424228 -----  
EPI\_ISL\_424230 -----  
EPI\_ISL\_424231 -----  
EPI\_ISL\_424240 -----  
EPI\_ISL\_424241 -----  
EPI\_ISL\_424243 -----  
EPI\_ISL\_424247 -----  
EPI\_ISL\_424249 -----  
EPI\_ISL\_424250 -----  
EPI\_ISL\_424252 -----  
EPI\_ISL\_424258 -----  
EPI\_ISL\_424268 -----  
EPI\_ISL\_424269 -----  
EPI\_ISL\_424275 -----  
EPI\_ISL\_424276 -----  
EPI\_ISL\_424279 -----

ORF1ab 4261 PANSTVLSFCAFAVDAAKAYKDYLASGGQPITNCVKMLCTHTGTGQAITVTPEANMDQES  
EPI\_ISL\_424219 -----  
EPI\_ISL\_424222 -----  
EPI\_ISL\_424223 -----  
EPI\_ISL\_424226 -----  
EPI\_ISL\_424228 -----  
EPI\_ISL\_424230 -----  
EPI\_ISL\_424231 -----  
EPI\_ISL\_424240 -----  
EPI\_ISL\_424241 -----  
EPI\_ISL\_424243 -----  
EPI\_ISL\_424247 -----  
EPI\_ISL\_424249 -----  
EPI\_ISL\_424250 -----  
EPI\_ISL\_424252 -----  
EPI\_ISL\_424258 -----  
EPI\_ISL\_424268 -----  
EPI\_ISL\_424269 -----  
EPI\_ISL\_424275 -----  
EPI\_ISL\_424276 -----



ORF1ab 4321 FGGASCCLYCRCHIDHPNPKGFCDLKGKYVQIPTTCANDPVGFTLKNNTVCTVCGMWKGYG  
EPI\_ISL\_424219 -----  
EPI\_ISL\_424222 -----  
EPI\_ISL\_424223 -----  
EPI\_ISL\_424226 -----  
EPI\_ISL\_424228 -----  
EPI\_ISL\_424230 -----  
EPI\_ISL\_424231 -----  
EPI\_ISL\_424240 -----  
EPI\_ISL\_424241 -----  
EPI\_ISL\_424243 -----  
EPI\_ISL\_424247 -----  
EPI\_ISL\_424249 -----  
EPI\_ISL\_424250 -----  
EPI\_ISL\_424252 -----  
EPI\_ISL\_424258 -----  
EPI\_ISL\_424268 -----  
EPI\_ISL\_424269 -----  
EPI\_ISL\_424275 -----  
EPI\_ISL\_424276 -----  
EPI\_ISL\_424279 -----

ORF1ab 4381 CSCDQLREPLQSDAQSFLNRVCGVSAARLTPCGTGTSTDVVYRAFDIYNDKVAGFAKF  
EPI\_ISL\_424219 -----  
EPI\_ISL\_424222 -----  
EPI\_ISL\_424223 -----  
EPI\_ISL\_424226 -----  
EPI\_ISL\_424228 -----  
EPI\_ISL\_424230 -----  
EPI\_ISL\_424231 -----  
EPI\_ISL\_424240 -----  
EPI\_ISL\_424241 -----  
EPI\_ISL\_424243 -----  
EPI\_ISL\_424247 -----  
EPI\_ISL\_424249 -----  
EPI\_ISL\_424250 -----  
EPI\_ISL\_424252 -----  
EPI\_ISL\_424258 -----  
EPI\_ISL\_424268 -----  
EPI\_ISL\_424269 -----  
EPI\_ISL\_424275 -----  
EPI\_ISL\_424276 -----  
EPI\_ISL\_424279 -----

ORF1ab 4441 LKTNCCRFQEKDEDDNLI DSYFVVKRHTFSNYQHEETIYNLLKDCPAVAKHDFKFRIDG  
EPI\_ISL\_424219 -----  
EPI\_ISL\_424222 -----  
EPI\_ISL\_424223 -----  
EPI\_ISL\_424226 -----  
EPI\_ISL\_424228 -----  
EPI\_ISL\_424230 -----  
EPI\_ISL\_424231 -----  
EPI\_ISL\_424240 -----  
EPI\_ISL\_424241 -----  
EPI\_ISL\_424243 -----  
EPI\_ISL\_424247 -----  
EPI\_ISL\_424249 -----  
EPI\_ISL\_424250 -----  
EPI\_ISL\_424252 -----  
EPI\_ISL\_424258 -----  
EPI\_ISL\_424268 -----  
EPI\_ISL\_424269 -----  
EPI\_ISL\_424275 -----  
EPI\_ISL\_424276 -----





ORF1ab 4501 DMVPHISRQLTKYTMADLVYALRHFDEGNCDTLKEILVTYNCCDDDYFNKKDWYDFVEN  
EPI\_ISL\_424219 -----  
EPI\_ISL\_424222 -----  
EPI\_ISL\_424223 -----  
EPI\_ISL\_424226 -----  
EPI\_ISL\_424228 -----  
EPI\_ISL\_424230 -----  
EPI\_ISL\_424231 -----  
EPI\_ISL\_424240 -----  
EPI\_ISL\_424241 -----  
EPI\_ISL\_424243 -----  
EPI\_ISL\_424247 -----  
EPI\_ISL\_424249 -----  
EPI\_ISL\_424250 -----  
EPI\_ISL\_424252 -----  
EPI\_ISL\_424258 -----  
EPI\_ISL\_424268 -----  
EPI\_ISL\_424269 -----  
EPI\_ISL\_424275 -----  
EPI\_ISL\_424276 -----  
EPI\_ISL\_424279 -----

ORF1ab 4561 PDILRVYANLGERVRQALLKTVQFCDAMRNAGIVGVLTLDNQDLNNGNWYDFGDFIQTPG  
EPI\_ISL\_424219 -----  
EPI\_ISL\_424222 -----  
EPI\_ISL\_424223 -----  
EPI\_ISL\_424226 -----  
EPI\_ISL\_424228 -----  
EPI\_ISL\_424230 -----  
EPI\_ISL\_424231 -----  
EPI\_ISL\_424240 -----  
EPI\_ISL\_424241 -----  
EPI\_ISL\_424243 -----  
EPI\_ISL\_424247 -----  
EPI\_ISL\_424249 -----  
EPI\_ISL\_424250 -----  
EPI\_ISL\_424252 -----  
EPI\_ISL\_424258 -----  
EPI\_ISL\_424268 -----  
EPI\_ISL\_424269 -----  
EPI\_ISL\_424275 -----  
EPI\_ISL\_424276 -----  
EPI\_ISL\_424279 -----

ORF1ab 4621 SGVPVVDSSYSLMLPILTLTRALTAESHVDTDLTKPYIKWDLKLYDFTEERLKLFDRYFK  
EPI\_ISL\_424219 -----  
EPI\_ISL\_424222 -----  
EPI\_ISL\_424223 -----  
EPI\_ISL\_424226 -----  
EPI\_ISL\_424228 -----  
EPI\_ISL\_424230 -----  
EPI\_ISL\_424231 -----  
EPI\_ISL\_424240 -----  
EPI\_ISL\_424241 -----  
EPI\_ISL\_424243 -----  
EPI\_ISL\_424247 -----  
EPI\_ISL\_424249 -----  
EPI\_ISL\_424250 -----  
EPI\_ISL\_424252 -----  
EPI\_ISL\_424258 -----  
EPI\_ISL\_424268 -----  
EPI\_ISL\_424269 -----  
EPI\_ISL\_424275 -----  
EPI\_ISL\_424276 -----



ORF1ab 4681 YWDQTYHPNCVNCLDDRCILHCANFNVLVSTVFPPTSFGPLVRKIFVDGVPFVVSTGYHF  
EPI\_ISL\_424219 -----  
EPI\_ISL\_424222 -----  
EPI\_ISL\_424223 -----  
EPI\_ISL\_424226 -----  
EPI\_ISL\_424228 -----  
EPI\_ISL\_424230 -----  
EPI\_ISL\_424231 -----  
EPI\_ISL\_424240 -----  
EPI\_ISL\_424241 -----  
EPI\_ISL\_424243 -----  
EPI\_ISL\_424247 -----  
EPI\_ISL\_424249 -----  
EPI\_ISL\_424250 -----  
EPI\_ISL\_424252 -----  
EPI\_ISL\_424258 -----  
EPI\_ISL\_424268 -----  
EPI\_ISL\_424269 -----  
EPI\_ISL\_424275 -----  
EPI\_ISL\_424276 -----  
EPI\_ISL\_424279 -----

ORF1ab 4741 RELGVVHNQDVNLHSSRSLSFKELLVYAADPAMHAASGNLLLDKRTTCFSVAALTNNVAFQ  
EPI\_ISL\_424219 -----  
EPI\_ISL\_424222 -----  
EPI\_ISL\_424223 -----  
EPI\_ISL\_424226 -----  
EPI\_ISL\_424228 -----  
EPI\_ISL\_424230 -----  
EPI\_ISL\_424231 -----  
EPI\_ISL\_424240 -----  
EPI\_ISL\_424241 -----  
EPI\_ISL\_424243 -----  
EPI\_ISL\_424247 -----  
EPI\_ISL\_424249 -----  
EPI\_ISL\_424250 -----  
EPI\_ISL\_424252 -----  
EPI\_ISL\_424258 -----  
EPI\_ISL\_424268 -----  
EPI\_ISL\_424269 -----  
EPI\_ISL\_424275 -----  
EPI\_ISL\_424276 -----  
EPI\_ISL\_424279 -----

ORF1ab 4801 TVKPGNFKDFYDFAVSKGFFKEGSSVELKHFFFAQDGNAAISDYDYRYNLPTMCDIRQ  
EPI\_ISL\_424219 -----  
EPI\_ISL\_424222 -----  
EPI\_ISL\_424223 -----  
EPI\_ISL\_424226 -----  
EPI\_ISL\_424228 -----  
EPI\_ISL\_424230 -----  
EPI\_ISL\_424231 -----  
EPI\_ISL\_424240 -----  
EPI\_ISL\_424241 -----  
EPI\_ISL\_424243 -----  
EPI\_ISL\_424247 -----  
EPI\_ISL\_424249 -----  
EPI\_ISL\_424250 -----  
EPI\_ISL\_424252 -----  
EPI\_ISL\_424258 -----  
EPI\_ISL\_424268 -----  
EPI\_ISL\_424269 -----  
EPI\_ISL\_424275 -----  
EPI\_ISL\_424276 -----



ORF1ab 4861 LLFVVEVVDKYFDCYDGGCINANQVIVNNLDKSAGFPFNKWKARLYYDSMSYEDQDALF  
EPI\_ISL\_424219 -----  
EPI\_ISL\_424222 -----  
EPI\_ISL\_424223 -----  
EPI\_ISL\_424226 -----  
EPI\_ISL\_424228 -----  
EPI\_ISL\_424230 -----  
EPI\_ISL\_424231 -----  
EPI\_ISL\_424240 -----  
EPI\_ISL\_424241 -----  
EPI\_ISL\_424243 -----  
EPI\_ISL\_424247 -----  
EPI\_ISL\_424249 -----  
EPI\_ISL\_424250 -----  
EPI\_ISL\_424252 -----  
EPI\_ISL\_424258 -----  
EPI\_ISL\_424268 -----  
EPI\_ISL\_424269 -----  
EPI\_ISL\_424275 -----  
EPI\_ISL\_424276 -----  
EPI\_ISL\_424279 -----

ORF1ab 4921 AYTKRNVIPTITQMNLYAISAKNRARTVAGVSICTMTNRQFHQKLLKLSIAATRGATVV  
EPI\_ISL\_424219 -----  
EPI\_ISL\_424222 -----  
EPI\_ISL\_424223 -----  
EPI\_ISL\_424226 -----  
EPI\_ISL\_424228 -----  
EPI\_ISL\_424230 -----  
EPI\_ISL\_424231 -----  
EPI\_ISL\_424240 -----  
EPI\_ISL\_424241 -----  
EPI\_ISL\_424243 -----  
EPI\_ISL\_424247 -----  
EPI\_ISL\_424249 -----  
EPI\_ISL\_424250 -----  
EPI\_ISL\_424252 -----  
EPI\_ISL\_424258 -----  
EPI\_ISL\_424268 -----  
EPI\_ISL\_424269 -----  
EPI\_ISL\_424275 -----  
EPI\_ISL\_424276 -----  
EPI\_ISL\_424279 -----

ORF1ab 4981 IGTSKIFYGGWHNMLKTVYSDVENPHLMGWDYPKCDRAMPNMLRIMASLVLARKHTTCCSL  
EPI\_ISL\_424219 -----  
EPI\_ISL\_424222 -----  
EPI\_ISL\_424223 -----  
EPI\_ISL\_424226 -----  
EPI\_ISL\_424228 -----  
EPI\_ISL\_424230 -----  
EPI\_ISL\_424231 -----  
EPI\_ISL\_424240 -----  
EPI\_ISL\_424241 -----  
EPI\_ISL\_424243 -----  
EPI\_ISL\_424247 -----  
EPI\_ISL\_424249 -----  
EPI\_ISL\_424250 -----  
EPI\_ISL\_424252 -----  
EPI\_ISL\_424258 -----  
EPI\_ISL\_424268 -----  
EPI\_ISL\_424269 -----  
EPI\_ISL\_424275 -----  
EPI\_ISL\_424276 -----



ORF1ab 5041 SHRFYRLANECAQVLSEMVMCGGSLYVKPGGTSSGDATTAYANSVFNICQAVTANVNALL  
EPI\_ISL\_424219 -----  
EPI\_ISL\_424222 -----  
EPI\_ISL\_424223 -----  
EPI\_ISL\_424226 -----  
EPI\_ISL\_424228 -----  
EPI\_ISL\_424230 -----  
EPI\_ISL\_424231 -----  
EPI\_ISL\_424240 -----  
EPI\_ISL\_424241 -----  
EPI\_ISL\_424243 -----  
EPI\_ISL\_424247 -----  
EPI\_ISL\_424249 -----  
EPI\_ISL\_424250 -----  
EPI\_ISL\_424252 -----  
EPI\_ISL\_424258 -----  
EPI\_ISL\_424268 -----  
EPI\_ISL\_424269 -----  
EPI\_ISL\_424275 -----  
EPI\_ISL\_424276 -----  
EPI\_ISL\_424279 -----

ORF1ab 5101 STDGNKIADKYVRNLQHRLYECLYRNRDVTDFVNEFYAYLRKHFSSMILSDDAVVCFNS  
EPI\_ISL\_424219 -----  
EPI\_ISL\_424222 -----  
EPI\_ISL\_424223 -----  
EPI\_ISL\_424226 -----  
EPI\_ISL\_424228 -----  
EPI\_ISL\_424230 -----  
EPI\_ISL\_424231 -----  
EPI\_ISL\_424240 -----  
EPI\_ISL\_424241 -----  
EPI\_ISL\_424243 -----  
EPI\_ISL\_424247 -----  
EPI\_ISL\_424249 -----  
EPI\_ISL\_424250 -----  
EPI\_ISL\_424252 -----  
EPI\_ISL\_424258 -----  
EPI\_ISL\_424268 -----  
EPI\_ISL\_424269 -----  
EPI\_ISL\_424275 -----  
EPI\_ISL\_424276 -----  
EPI\_ISL\_424279 -----

ORF1ab 5161 TYASQGLVASIKNFKSVLYYQNNVFMSEAKCWTETDLTKGPHEFCSQHTMLVKQGDDYVY  
EPI\_ISL\_424219 -----  
EPI\_ISL\_424222 -----  
EPI\_ISL\_424223 -----  
EPI\_ISL\_424226 -----  
EPI\_ISL\_424228 -----  
EPI\_ISL\_424230 -----  
EPI\_ISL\_424231 -----  
EPI\_ISL\_424240 -----  
EPI\_ISL\_424241 -----  
EPI\_ISL\_424243 -----  
EPI\_ISL\_424247 -----  
EPI\_ISL\_424249 -----  
EPI\_ISL\_424250 -----  
EPI\_ISL\_424252 -----  
EPI\_ISL\_424258 -----  
EPI\_ISL\_424268 -----  
EPI\_ISL\_424269 -----  
EPI\_ISL\_424275 -----  
EPI\_ISL\_424276 -----





ORF1ab 5221 LPYPDPSRILGAGCFVDDIVKTDGTLMIERFVSLAIDAYPLTKHPNQEYADVFLHLYLQYI  
EPI\_ISL\_424219 -----  
EPI\_ISL\_424222 -----  
EPI\_ISL\_424223 -----  
EPI\_ISL\_424226 -----  
EPI\_ISL\_424228 -----  
EPI\_ISL\_424230 -----  
EPI\_ISL\_424231 -----  
EPI\_ISL\_424240 -----  
EPI\_ISL\_424241 -----  
EPI\_ISL\_424243 -----  
EPI\_ISL\_424247 -----  
EPI\_ISL\_424249 -----  
EPI\_ISL\_424250 -----  
EPI\_ISL\_424252 -----  
EPI\_ISL\_424258 -----  
EPI\_ISL\_424268 -----  
EPI\_ISL\_424269 -----  
EPI\_ISL\_424275 -----  
EPI\_ISL\_424276 -----  
EPI\_ISL\_424279 -----

ORF1ab 5281 RKLHDELGTGHMLDMYSVMLTNDNTSRYWEPEFYEAMYPHTVLQAVGACVLCNSQTSLRC  
EPI\_ISL\_424219 -----  
EPI\_ISL\_424222 -----  
EPI\_ISL\_424223 -----  
EPI\_ISL\_424226 -----  
EPI\_ISL\_424228 -----  
EPI\_ISL\_424230 -----  
EPI\_ISL\_424231 -----  
EPI\_ISL\_424240 -----  
EPI\_ISL\_424241 -----  
EPI\_ISL\_424243 -----  
EPI\_ISL\_424247 -----  
EPI\_ISL\_424249 -----  
EPI\_ISL\_424250 -----  
EPI\_ISL\_424252 -----  
EPI\_ISL\_424258 -----  
EPI\_ISL\_424268 -----  
EPI\_ISL\_424269 -----  
EPI\_ISL\_424275 -----  
EPI\_ISL\_424276 -----  
EPI\_ISL\_424279 -----

ORF1ab 5341 GACIRRPFLCCKCCYDHVISTSHKLVLSVNPYVCNAPGCDVTDVTDVTLQLYLGGMSSYYCKSHK  
EPI\_ISL\_424219 -----  
EPI\_ISL\_424222 -----  
EPI\_ISL\_424223 -----  
EPI\_ISL\_424226 -----  
EPI\_ISL\_424228 -----  
EPI\_ISL\_424230 -----  
EPI\_ISL\_424231 -----  
EPI\_ISL\_424240 -----  
EPI\_ISL\_424241 -----  
EPI\_ISL\_424243 -----  
EPI\_ISL\_424247 -----  
EPI\_ISL\_424249 -----  
EPI\_ISL\_424250 -----  
EPI\_ISL\_424252 -----  
EPI\_ISL\_424258 -----  
EPI\_ISL\_424268 -----  
EPI\_ISL\_424269 -----  
EPI\_ISL\_424275 -----  
EPI\_ISL\_424276 -----



ORF1ab 5401 PPISFPLCANGQVFGLYKNTCVGSDNVTDFNAIATCDWTNAGDYILANTCTERLKLFAAE  
EPI\_ISL\_424219 -----  
EPI\_ISL\_424222 -----  
EPI\_ISL\_424223 -----  
EPI\_ISL\_424226 -----  
EPI\_ISL\_424228 -----  
EPI\_ISL\_424230 -----  
EPI\_ISL\_424231 -----  
EPI\_ISL\_424240 -----  
EPI\_ISL\_424241 -----  
EPI\_ISL\_424243 -----  
EPI\_ISL\_424247 -----  
EPI\_ISL\_424249 -----  
EPI\_ISL\_424250 -----  
EPI\_ISL\_424252 -----  
EPI\_ISL\_424258 -----  
EPI\_ISL\_424268 -----  
EPI\_ISL\_424269 -----  
EPI\_ISL\_424275 -----  
EPI\_ISL\_424276 -----  
EPI\_ISL\_424279 -----

ORF1ab 5461 TLKATEETFKLSYGIATVREVLSDRELHLSWEVKGKPRPPLNRNYVFTGYRVTKNSKVQIG  
EPI\_ISL\_424219 -----  
EPI\_ISL\_424222 -----  
EPI\_ISL\_424223 -----  
EPI\_ISL\_424226 -----  
EPI\_ISL\_424228 -----  
EPI\_ISL\_424230 -----  
EPI\_ISL\_424231 -----  
EPI\_ISL\_424240 -----  
EPI\_ISL\_424241 -----  
EPI\_ISL\_424243 -----  
EPI\_ISL\_424247 -----  
EPI\_ISL\_424249 -----  
EPI\_ISL\_424250 -----  
EPI\_ISL\_424252 -----  
EPI\_ISL\_424258 -----  
EPI\_ISL\_424268 -----  
EPI\_ISL\_424269 -----  
EPI\_ISL\_424275 -----  
EPI\_ISL\_424276 -----  
EPI\_ISL\_424279 -----

ORF1ab 5521 EYTFEKGDYGDVAVYRGTTTTYKLVNGDYFVLTSHTVMPLSAPTLVLPQEHYVRITGLYPTL  
EPI\_ISL\_424219 -----  
EPI\_ISL\_424222 -----  
EPI\_ISL\_424223 -----  
EPI\_ISL\_424226 -----  
EPI\_ISL\_424228 -----  
EPI\_ISL\_424230 -----  
EPI\_ISL\_424231 -----  
EPI\_ISL\_424240 -----  
EPI\_ISL\_424241 -----  
EPI\_ISL\_424243 -----  
EPI\_ISL\_424247 -----  
EPI\_ISL\_424249 -----  
EPI\_ISL\_424250 -----  
EPI\_ISL\_424252 -----  
EPI\_ISL\_424258 -----  
EPI\_ISL\_424268 -----  
EPI\_ISL\_424269 -----  
EPI\_ISL\_424275 -----  
EPI\_ISL\_424276 -----



ORF1ab 5581 NISDEFSSNVANYQKVGMQKYSTLQGPPGTGKSHFAIGLALYYPSARIVYTACSHAAVDA  
EPI\_ISL\_424219 -----  
EPI\_ISL\_424222 -----  
EPI\_ISL\_424223 -----  
EPI\_ISL\_424226 -----  
EPI\_ISL\_424228 -----  
EPI\_ISL\_424230 -----  
EPI\_ISL\_424231 -----  
EPI\_ISL\_424240 -----  
EPI\_ISL\_424241 -----  
EPI\_ISL\_424243 -----  
EPI\_ISL\_424247 -----  
EPI\_ISL\_424249 -----  
EPI\_ISL\_424250 -----  
EPI\_ISL\_424252 -----  
EPI\_ISL\_424258 -----  
EPI\_ISL\_424268 -----  
EPI\_ISL\_424269 -----  
EPI\_ISL\_424275 -----  
EPI\_ISL\_424276 -----  
EPI\_ISL\_424279 -----

ORF1ab 5641 LCEKALKYLPIDKCSRIIPARARVECFDKFKVNSTLEQYVFCTVNALPETTADIVVFDEI  
EPI\_ISL\_424219 -----  
EPI\_ISL\_424222 -----  
EPI\_ISL\_424223 -----  
EPI\_ISL\_424226 -----  
EPI\_ISL\_424228 -----  
EPI\_ISL\_424230 -----  
EPI\_ISL\_424231 -----  
EPI\_ISL\_424240 -----  
EPI\_ISL\_424241 -----  
EPI\_ISL\_424243 -----  
EPI\_ISL\_424247 -----  
EPI\_ISL\_424249 -----  
EPI\_ISL\_424250 -----  
EPI\_ISL\_424252 -----  
EPI\_ISL\_424258 -----  
EPI\_ISL\_424268 -----  
EPI\_ISL\_424269 -----  
EPI\_ISL\_424275 -----  
EPI\_ISL\_424276 -----  
EPI\_ISL\_424279 -----

ORF1ab 5701 SMATNYDLSVVNARLRKHYVYIGDPAQLPAPRTLLTKGTLEPEYFNSVCRLMKTIGPDM  
EPI\_ISL\_424219 -----  
EPI\_ISL\_424222 -----  
EPI\_ISL\_424223 -----  
EPI\_ISL\_424226 -----  
EPI\_ISL\_424228 -----  
EPI\_ISL\_424230 -----  
EPI\_ISL\_424231 -----  
EPI\_ISL\_424240 -----  
EPI\_ISL\_424241 -----  
EPI\_ISL\_424243 -----  
EPI\_ISL\_424247 -----  
EPI\_ISL\_424249 -----  
EPI\_ISL\_424250 -----  
EPI\_ISL\_424252 -----  
EPI\_ISL\_424258 -----  
EPI\_ISL\_424268 -----  
EPI\_ISL\_424269 -----  
EPI\_ISL\_424275 -----  
EPI\_ISL\_424276 -----



ORF1ab 5761 FLGTCRRCPAEIVDVTVSALVYDNKCLKAHKDKSAQCCKMFKYKGVITHDVSSAINRPQIGVV  
EPI\_ISL\_424219 -----  
EPI\_ISL\_424222 -----  
EPI\_ISL\_424223 -----  
EPI\_ISL\_424226 -----  
EPI\_ISL\_424228 -----  
EPI\_ISL\_424230 -----  
EPI\_ISL\_424231 -----  
EPI\_ISL\_424240 -----  
EPI\_ISL\_424241 -----  
EPI\_ISL\_424243 -----  
EPI\_ISL\_424247 -----  
EPI\_ISL\_424249 -----  
EPI\_ISL\_424250 -----  
EPI\_ISL\_424252 -----  
EPI\_ISL\_424258 -----  
EPI\_ISL\_424268 -----  
EPI\_ISL\_424269 -----  
EPI\_ISL\_424275 -----  
EPI\_ISL\_424276 -----  
EPI\_ISL\_424279 -----

ORF1ab 5821 REFLTRNPAWRKAVFISPYN SQNAVASKILGLPTQTV DSSQGSEYDYVIFTQT TETAHSC  
EPI\_ISL\_424219 -----  
EPI\_ISL\_424222 -----  
EPI\_ISL\_424223 -----  
EPI\_ISL\_424226 -----  
EPI\_ISL\_424228 -----  
EPI\_ISL\_424230 -----  
EPI\_ISL\_424231 -----  
EPI\_ISL\_424240 -----  
EPI\_ISL\_424241 -----  
EPI\_ISL\_424243 -----  
EPI\_ISL\_424247 -----  
EPI\_ISL\_424249 -----  
EPI\_ISL\_424250 -----  
EPI\_ISL\_424252 -----  
EPI\_ISL\_424258 -----  
EPI\_ISL\_424268 -----  
EPI\_ISL\_424269 -----  
EPI\_ISL\_424275 -----  
EPI\_ISL\_424276 -----  
EPI\_ISL\_424279 -----

ORF1ab 5881 NVNRFNVAITRAKVGILCIMS DRRDLYDKLQFTSLEI PRRNVATLQAENVTGLFKDCSKVI  
EPI\_ISL\_424219 -----  
EPI\_ISL\_424222 -----  
EPI\_ISL\_424223 -----  
EPI\_ISL\_424226 -----  
EPI\_ISL\_424228 -----  
EPI\_ISL\_424230 -----  
EPI\_ISL\_424231 -----  
EPI\_ISL\_424240 -----  
EPI\_ISL\_424241 -----  
EPI\_ISL\_424243 -----  
EPI\_ISL\_424247 -----  
EPI\_ISL\_424249 -----  
EPI\_ISL\_424250 -----  
EPI\_ISL\_424252 -----  
EPI\_ISL\_424258 -----  
EPI\_ISL\_424268 -----  
EPI\_ISL\_424269 -----  
EPI\_ISL\_424275 -----  
EPI\_ISL\_424276 -----





ORF1ab 5941 TGLHPTQAPTHLSVDTKFKTEGLCVDIPGIPKDMTYRRLISMMGFKMNYQVNGYPNMFIT  
EPI\_ISL\_424219 -----  
EPI\_ISL\_424222 -----  
EPI\_ISL\_424223 -----  
EPI\_ISL\_424226 -----  
EPI\_ISL\_424228 -----  
EPI\_ISL\_424230 -----  
EPI\_ISL\_424231 -----  
EPI\_ISL\_424240 -----  
EPI\_ISL\_424241 -----  
EPI\_ISL\_424243 -----  
EPI\_ISL\_424247 -----  
EPI\_ISL\_424249 -----  
EPI\_ISL\_424250 -----  
EPI\_ISL\_424252 -----  
EPI\_ISL\_424258 -----  
EPI\_ISL\_424268 -----  
EPI\_ISL\_424269 -----  
EPI\_ISL\_424275 -----  
EPI\_ISL\_424276 -----  
EPI\_ISL\_424279 -----

ORF1ab 6001 REEAIRHVRAWIGFDVEGCHATREAVGTNLPLQLGFSTGVNLVAVPTGYVDTPNNTDFSR  
EPI\_ISL\_424219 -----  
EPI\_ISL\_424222 -----  
EPI\_ISL\_424223 -----  
EPI\_ISL\_424226 -----  
EPI\_ISL\_424228 -----  
EPI\_ISL\_424230 -----  
EPI\_ISL\_424231 -----  
EPI\_ISL\_424240 -----  
EPI\_ISL\_424241 -----  
EPI\_ISL\_424243 -----  
EPI\_ISL\_424247 -----  
EPI\_ISL\_424249 -----  
EPI\_ISL\_424250 -----  
EPI\_ISL\_424252 -----  
EPI\_ISL\_424258 -----  
EPI\_ISL\_424268 -----  
EPI\_ISL\_424269 -----  
EPI\_ISL\_424275 -----  
EPI\_ISL\_424276 -----  
EPI\_ISL\_424279 -----

ORF1ab 6061 VSAKPPPGDQFKHLIPLMYKGLPWNVVRKIVQMLSDTLKNLSDRVVFVLWAHGFELTSM  
EPI\_ISL\_424219 -----  
EPI\_ISL\_424222 -----  
EPI\_ISL\_424223 -----  
EPI\_ISL\_424226 -----  
EPI\_ISL\_424228 -----  
EPI\_ISL\_424230 -----  
EPI\_ISL\_424231 -----  
EPI\_ISL\_424240 -----  
EPI\_ISL\_424241 -----  
EPI\_ISL\_424243 -----  
EPI\_ISL\_424247 -----  
EPI\_ISL\_424249 -----  
EPI\_ISL\_424250 -----  
EPI\_ISL\_424252 -----  
EPI\_ISL\_424258 -----  
EPI\_ISL\_424268 -----  
EPI\_ISL\_424269 -----  
EPI\_ISL\_424275 -----  
EPI\_ISL\_424276 -----



ORF1ab 6121 KYFVKIGPERTCCLCDRRATCFSTASDTYACWHHSIGFDYVYNPFMIDVQQWGF TGNLQS  
EPI\_ISL\_424219 -----  
EPI\_ISL\_424222 -----  
EPI\_ISL\_424223 -----  
EPI\_ISL\_424226 -----  
EPI\_ISL\_424228 -----  
EPI\_ISL\_424230 -----  
EPI\_ISL\_424231 -----  
EPI\_ISL\_424240 -----  
EPI\_ISL\_424241 -----  
EPI\_ISL\_424243 -----  
EPI\_ISL\_424247 -----  
EPI\_ISL\_424249 -----  
EPI\_ISL\_424250 -----  
EPI\_ISL\_424252 -----  
EPI\_ISL\_424258 -----  
EPI\_ISL\_424268 -----  
EPI\_ISL\_424269 -----  
EPI\_ISL\_424275 -----  
EPI\_ISL\_424276 -----  
EPI\_ISL\_424279 -----

ORF1ab 6181 NHDLYCQVHGNAHVASCDAIMTRCLAVHECFVKRVDWTIEYPIIGDELKINAACRQVQHM  
EPI\_ISL\_424219 -----  
EPI\_ISL\_424222 -----  
EPI\_ISL\_424223 -----  
EPI\_ISL\_424226 -----  
EPI\_ISL\_424228 -----  
EPI\_ISL\_424230 -----  
EPI\_ISL\_424231 -----  
EPI\_ISL\_424240 -----  
EPI\_ISL\_424241 -----  
EPI\_ISL\_424243 -----  
EPI\_ISL\_424247 -----  
EPI\_ISL\_424249 -----  
EPI\_ISL\_424250 -----  
EPI\_ISL\_424252 -----  
EPI\_ISL\_424258 -----  
EPI\_ISL\_424268 -----  
EPI\_ISL\_424269 -----  
EPI\_ISL\_424275 -----  
EPI\_ISL\_424276 -----  
EPI\_ISL\_424279 -----

ORF1ab 6241 VVKAALLADKFPVLHDIGNPKAIKCVPQADVEWKFYDAQPCSDKAYKIEELFYSYATHSD  
EPI\_ISL\_424219 -----  
EPI\_ISL\_424222 -----  
EPI\_ISL\_424223 -----  
EPI\_ISL\_424226 -----  
EPI\_ISL\_424228 -----  
EPI\_ISL\_424230 -----  
EPI\_ISL\_424231 -----  
EPI\_ISL\_424240 -----  
EPI\_ISL\_424241 -----  
EPI\_ISL\_424243 -----  
EPI\_ISL\_424247 -----  
EPI\_ISL\_424249 -----  
EPI\_ISL\_424250 -----  
EPI\_ISL\_424252 -----  
EPI\_ISL\_424258 -----  
EPI\_ISL\_424268 -----  
EPI\_ISL\_424269 -----  
EPI\_ISL\_424275 -----  
EPI\_ISL\_424276 -----

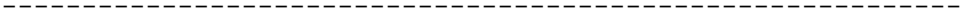

ORF1ab 6301 KFTDGVCLFWNCNVDRYPANSIVCRFDTRVLSNLNLPGCDGGSLYVNKHAFHTPAFDKSA  
EPI\_ISL\_424219 -----  
EPI\_ISL\_424222 -----  
EPI\_ISL\_424223 -----  
EPI\_ISL\_424226 -----  
EPI\_ISL\_424228 -----  
EPI\_ISL\_424230 -----  
EPI\_ISL\_424231 -----  
EPI\_ISL\_424240 -----  
EPI\_ISL\_424241 -----  
EPI\_ISL\_424243 -----  
EPI\_ISL\_424247 -----  
EPI\_ISL\_424249 -----  
EPI\_ISL\_424250 -----  
EPI\_ISL\_424252 -----  
EPI\_ISL\_424258 -----  
EPI\_ISL\_424268 -----  
EPI\_ISL\_424269 -----  
EPI\_ISL\_424275 -----  
EPI\_ISL\_424276 -----  
EPI\_ISL\_424279 -----

ORF1ab 6361 FVNLKQLPFFYYSDSPCESHGKQVVSIDIDYVPLKSATCITRCNLGGAVCRHHANEYRLYL  
EPI\_ISL\_424219 -----  
EPI\_ISL\_424222 -----  
EPI\_ISL\_424223 -----  
EPI\_ISL\_424226 -----  
EPI\_ISL\_424228 -----  
EPI\_ISL\_424230 -----  
EPI\_ISL\_424231 -----  
EPI\_ISL\_424240 -----  
EPI\_ISL\_424241 -----  
EPI\_ISL\_424243 -----  
EPI\_ISL\_424247 -----  
EPI\_ISL\_424249 -----  
EPI\_ISL\_424250 -----  
EPI\_ISL\_424252 -----  
EPI\_ISL\_424258 -----  
EPI\_ISL\_424268 -----  
EPI\_ISL\_424269 -----  
EPI\_ISL\_424275 -----  
EPI\_ISL\_424276 -----  
EPI\_ISL\_424279 -----

ORF1ab 6421 DAYNMMISAGFSLWVYKQFDTYNLWNTFTRLQSLNVAFNVVNKGHFDGQQGEVPSIIN  
EPI\_ISL\_424219 -----  
EPI\_ISL\_424222 -----  
EPI\_ISL\_424223 -----  
EPI\_ISL\_424226 -----  
EPI\_ISL\_424228 -----  
EPI\_ISL\_424230 -----  
EPI\_ISL\_424231 -----  
EPI\_ISL\_424240 -----  
EPI\_ISL\_424241 -----  
EPI\_ISL\_424243 -----  
EPI\_ISL\_424247 -----  
EPI\_ISL\_424249 -----  
EPI\_ISL\_424250 -----  
EPI\_ISL\_424252 -----  
EPI\_ISL\_424258 -----  
EPI\_ISL\_424268 -----  
EPI\_ISL\_424269 -----  
EPI\_ISL\_424275 -----  
EPI\_ISL\_424276 -----



ORF1ab 6481 NTVYTKVDGVDVELFENKTTLPVNVAFELWAKRNIKPVPEVKILNNLGVDIAANTVIWDY  
EPI\_ISL\_424219 -----  
EPI\_ISL\_424222 -----  
EPI\_ISL\_424223 -----  
EPI\_ISL\_424226 -----  
EPI\_ISL\_424228 -----  
EPI\_ISL\_424230 -----  
EPI\_ISL\_424231 -----  
EPI\_ISL\_424240 -----  
EPI\_ISL\_424241 -----  
EPI\_ISL\_424243 -----  
EPI\_ISL\_424247 -----  
EPI\_ISL\_424249 -----  
EPI\_ISL\_424250 -----  
EPI\_ISL\_424252 -----  
EPI\_ISL\_424258 -----  
EPI\_ISL\_424268 -----  
EPI\_ISL\_424269 -----  
EPI\_ISL\_424275 -----  
EPI\_ISL\_424276 -----  
EPI\_ISL\_424279 -----

ORF1ab 6541 KRDAHAHISTIGVCSMTDIAKKPTETICAPLTVFFDGRVDGQVDLFRNARNGVLITEGSV  
EPI\_ISL\_424219 -----  
EPI\_ISL\_424222 -----  
EPI\_ISL\_424223 -----  
EPI\_ISL\_424226 -----  
EPI\_ISL\_424228 -----  
EPI\_ISL\_424230 -----  
EPI\_ISL\_424231 -----  
EPI\_ISL\_424240 -----  
EPI\_ISL\_424241 -----  
EPI\_ISL\_424243 -----  
EPI\_ISL\_424247 -----  
EPI\_ISL\_424249 -----  
EPI\_ISL\_424250 -----  
EPI\_ISL\_424252 -----  
EPI\_ISL\_424258 -----  
EPI\_ISL\_424268 -----  
EPI\_ISL\_424269 -----  
EPI\_ISL\_424275 -----  
EPI\_ISL\_424276 -----  
EPI\_ISL\_424279 -----

ORF1ab 6601 KGLQPSVGPKQASLNGVTLIGEAVKTQFNYYKKVDGTVVQQLPETYFTQSRNLQEFKPRSQ  
EPI\_ISL\_424219 -----  
EPI\_ISL\_424222 -----  
EPI\_ISL\_424223 -----  
EPI\_ISL\_424226 -----  
EPI\_ISL\_424228 -----  
EPI\_ISL\_424230 -----  
EPI\_ISL\_424231 -----  
EPI\_ISL\_424240 -----  
EPI\_ISL\_424241 -----  
EPI\_ISL\_424243 -----  
EPI\_ISL\_424247 -----  
EPI\_ISL\_424249 -----  
EPI\_ISL\_424250 -----  
EPI\_ISL\_424252 -----  
EPI\_ISL\_424258 -----  
EPI\_ISL\_424268 -----  
EPI\_ISL\_424269 -----  
EPI\_ISL\_424275 -----  
EPI\_ISL\_424276 -----





ORF1ab 6661 MEIDFLELAMDEFIERYKLEGYAFEHIVYGDFSHSQLGGLHLLIQLAKRFKESPFLEDF  
EPI\_ISL\_424219 -----  
EPI\_ISL\_424222 -----  
EPI\_ISL\_424223 -----  
EPI\_ISL\_424226 -----  
EPI\_ISL\_424228 -----  
EPI\_ISL\_424230 -----  
EPI\_ISL\_424231 -----  
EPI\_ISL\_424240 -----  
EPI\_ISL\_424241 -----  
EPI\_ISL\_424243 -----  
EPI\_ISL\_424247 -----  
EPI\_ISL\_424249 -----  
EPI\_ISL\_424250 -----  
EPI\_ISL\_424252 -----  
EPI\_ISL\_424258 -----  
EPI\_ISL\_424268 -----  
EPI\_ISL\_424269 -----  
EPI\_ISL\_424275 -----  
EPI\_ISL\_424276 -----  
EPI\_ISL\_424279 -----

ORF1ab 6721 IPMDSTVKNYFITDAQTGSSKCVCSVIDLLLDDFVEI IKSQDLSVVSKVVKVTIDYTEIS  
EPI\_ISL\_424219 -----  
EPI\_ISL\_424222 -----  
EPI\_ISL\_424223 -----  
EPI\_ISL\_424226 -----  
EPI\_ISL\_424228 -----  
EPI\_ISL\_424230 -----  
EPI\_ISL\_424231 -----  
EPI\_ISL\_424240 -----  
EPI\_ISL\_424241 -----  
EPI\_ISL\_424243 -----  
EPI\_ISL\_424247 -----  
EPI\_ISL\_424249 -----  
EPI\_ISL\_424250 -----  
EPI\_ISL\_424252 -----  
EPI\_ISL\_424258 -----  
EPI\_ISL\_424268 -----  
EPI\_ISL\_424269 -----  
EPI\_ISL\_424275 -----  
EPI\_ISL\_424276 -----  
EPI\_ISL\_424279 -----

ORF1ab 6781 FMLWCKDGHVETFYPKLQSSQAWQPGVAMPNLYKMQRMLLEKCDLQNYGDSATLPKGIMM  
EPI\_ISL\_424219 -----  
EPI\_ISL\_424222 -----  
EPI\_ISL\_424223 -----  
EPI\_ISL\_424226 -----  
EPI\_ISL\_424228 -----  
EPI\_ISL\_424230 -----  
EPI\_ISL\_424231 -----  
EPI\_ISL\_424240 -----  
EPI\_ISL\_424241 -----  
EPI\_ISL\_424243 -----  
EPI\_ISL\_424247 -----  
EPI\_ISL\_424249 -----  
EPI\_ISL\_424250 -----  
EPI\_ISL\_424252 -----  
EPI\_ISL\_424258 -----  
EPI\_ISL\_424268 -----  
EPI\_ISL\_424269 -----  
EPI\_ISL\_424275 -----  
EPI\_ISL\_424276 -----



ORF1ab 6841 NVAKYTQLCQYLNTLTLAVPYNMRVIHFGAGSDKGVAPGTAVLRQWLPTGTLVDSDLND  
EPI\_ISL\_424219 -----  
EPI\_ISL\_424222 -----  
EPI\_ISL\_424223 -----  
EPI\_ISL\_424226 -----  
EPI\_ISL\_424228 -----  
EPI\_ISL\_424230 -----  
EPI\_ISL\_424231 -----  
EPI\_ISL\_424240 -----  
EPI\_ISL\_424241 -----  
EPI\_ISL\_424243 -----  
EPI\_ISL\_424247 -----  
EPI\_ISL\_424249 -----  
EPI\_ISL\_424250 -----  
EPI\_ISL\_424252 -----  
EPI\_ISL\_424258 -----  
EPI\_ISL\_424268 -----  
EPI\_ISL\_424269 -----  
EPI\_ISL\_424275 -----  
EPI\_ISL\_424276 -----  
EPI\_ISL\_424279 -----

ORF1ab 6901 FVSDADSTLIGDCATVHTANKWDLIISDMYDPKTKNVTKENDSKEGFFTYICGFIQQKLA  
EPI\_ISL\_424219 -----  
EPI\_ISL\_424222 -----  
EPI\_ISL\_424223 -----  
EPI\_ISL\_424226 -----  
EPI\_ISL\_424228 -----  
EPI\_ISL\_424230 -----  
EPI\_ISL\_424231 -----  
EPI\_ISL\_424240 -----  
EPI\_ISL\_424241 -----  
EPI\_ISL\_424243 -----  
EPI\_ISL\_424247 -----  
EPI\_ISL\_424249 -----  
EPI\_ISL\_424250 -----  
EPI\_ISL\_424252 -----  
EPI\_ISL\_424258 -----  
EPI\_ISL\_424268 -----  
EPI\_ISL\_424269 -----  
EPI\_ISL\_424275 -----  
EPI\_ISL\_424276 -----  
EPI\_ISL\_424279 -----

ORF1ab 6961 LGGSVAIKITEHSWNADLYKLMGHFAWWTAFVTNVNASSEAFILGICNYLGKPREQIDGY  
EPI\_ISL\_424219 -----  
EPI\_ISL\_424222 -----  
EPI\_ISL\_424223 -----  
EPI\_ISL\_424226 -----  
EPI\_ISL\_424228 -----  
EPI\_ISL\_424230 -----  
EPI\_ISL\_424231 -----  
EPI\_ISL\_424240 -----  
EPI\_ISL\_424241 -----  
EPI\_ISL\_424243 -----  
EPI\_ISL\_424247 -----  
EPI\_ISL\_424249 -----  
EPI\_ISL\_424250 -----  
EPI\_ISL\_424252 -----  
EPI\_ISL\_424258 -----  
EPI\_ISL\_424268 -----  
EPI\_ISL\_424269 -----  
EPI\_ISL\_424275 -----  
EPI\_ISL\_424276 -----



ORF1ab 7021 VMHANYIFWRNTNPIQLSSYSLFDMASKFPLKLRGTAVMSLKEGQINDMILSLLSKGRLII  
EPI\_ISL\_424219 -----  
EPI\_ISL\_424222 -----  
EPI\_ISL\_424223 -----  
EPI\_ISL\_424226 -----  
EPI\_ISL\_424228 -----  
EPI\_ISL\_424230 -----  
EPI\_ISL\_424231 -----  
EPI\_ISL\_424240 -----  
EPI\_ISL\_424241 -----  
EPI\_ISL\_424243 -----  
EPI\_ISL\_424247 -----  
EPI\_ISL\_424249 -----  
EPI\_ISL\_424250 -----  
EPI\_ISL\_424252 -----  
EPI\_ISL\_424258 -----  
EPI\_ISL\_424268 -----  
EPI\_ISL\_424269 -----  
EPI\_ISL\_424275 -----  
EPI\_ISL\_424276 -----  
EPI\_ISL\_424279 -----

ORF1ab 7081 RENNRRVVISSDVLVNN  
EPI\_ISL\_424219 -----  
EPI\_ISL\_424222 -----  
EPI\_ISL\_424223 -----  
EPI\_ISL\_424226 -----  
EPI\_ISL\_424228 -----  
EPI\_ISL\_424230 -----  
EPI\_ISL\_424231 -----  
EPI\_ISL\_424240 -----  
EPI\_ISL\_424241 -----  
EPI\_ISL\_424243 -----  
EPI\_ISL\_424247 -----  
EPI\_ISL\_424249 -----  
EPI\_ISL\_424250 -----  
EPI\_ISL\_424252 -----  
EPI\_ISL\_424258 -----  
EPI\_ISL\_424268 -----  
EPI\_ISL\_424269 -----  
EPI\_ISL\_424275 -----  
EPI\_ISL\_424276 -----  
EPI\_ISL\_424279 -----

## Clade V

ORF1ab 1 MESLVPGFNKTHVQLSLPVLQVRDVLVRGFGDSVEEVLSERQHLKDGTCGLVEVEKGV  
EPI\_ISL\_424224 1 -----  
EPI\_ISL\_424255 1 -----  
EPI\_ISL\_425501 1 -----  
EPI\_ISL\_425502 1 -----  
EPI\_ISL\_425504 1 -----  
EPI\_ISL\_425523 1 -----  
EPI\_ISL\_425535 1 -----  
EPI\_ISL\_425537 1 -----  
EPI\_ISL\_425549 1 -----  
EPI\_ISL\_425551 1 -----  
EPI\_ISL\_425562 1 -----  
EPI\_ISL\_425576 1 -----  
EPI\_ISL\_425586 1 -----  
EPI\_ISL\_425587 1 -----  
EPI\_ISL\_426817 1 -----  
EPI\_ISL\_426832 1 -----

ORF1ab 61 LPQLEQPYVFIKRS DARTAPHGHVMVELVAELEGIQYGRSGETLGVLVPHVGEIPVAYRK  
EPI\_ISL\_424224 1 -----  
EPI\_ISL\_424255 1 -----  
EPI\_ISL\_425501 1 -----  
EPI\_ISL\_425502 1 -----  
EPI\_ISL\_425504 1 -----  
EPI\_ISL\_425523 1 -----  
EPI\_ISL\_425535 1 -----  
EPI\_ISL\_425537 1 -----  
EPI\_ISL\_425549 1 -----  
EPI\_ISL\_425551 1 -----  
EPI\_ISL\_425562 1 -----  
EPI\_ISL\_425576 1 -----  
EPI\_ISL\_425586 1 -----  
EPI\_ISL\_425587 1 -----  
EPI\_ISL\_426817 1 -----  
EPI\_ISL\_426832 1 -----

ORF1ab 121 VLLRKNNGKGGAGGHSYGADLKSFDLGDDELGTDPYEDFQENWNTKHSSGV TRELMRELNGG  
EPI\_ISL\_424224 1 -----  
EPI\_ISL\_424255 1 -----  
EPI\_ISL\_425501 1 -----  
EPI\_ISL\_425502 1 -----  
EPI\_ISL\_425504 1 -----  
EPI\_ISL\_425523 1 -----  
EPI\_ISL\_425535 1 -----  
EPI\_ISL\_425537 1 -----  
EPI\_ISL\_425549 1 -----  
EPI\_ISL\_425551 1 -----  
EPI\_ISL\_425562 1 -----  
EPI\_ISL\_425576 1 -----  
EPI\_ISL\_425586 1 -----  
EPI\_ISL\_425587 1 -----  
EPI\_ISL\_426817 1 -----  
EPI\_ISL\_426832 1 -----

ORF1ab 181 AYTRYVDNDFCGPDGYPLECIKDLLARAGKASCTLSEQLDFIDTKRGVYCCREHEHEIAW  
EPI\_ISL\_424224 1 -----  
EPI\_ISL\_424255 1 -----  
EPI\_ISL\_425501 1 -----  
EPI\_ISL\_425502 1 -----

|                |   |       |
|----------------|---|-------|
| EPI_ISL_425504 | 1 | ----- |
| EPI_ISL_425523 | 1 | ----- |
| EPI_ISL_425535 | 1 | ----- |
| EPI_ISL_425537 | 1 | ----- |
| EPI_ISL_425549 | 1 | ----- |
| EPI_ISL_425551 | 1 | ----- |
| EPI_ISL_425562 | 1 | ----- |
| EPI_ISL_425576 | 1 | ----- |
| EPI_ISL_425586 | 1 | ----- |
| EPI_ISL_425587 | 1 | ----- |
| EPI_ISL_426817 | 1 | ----- |
| EPI_ISL_426832 | 1 | ----- |



ORF1ab 241 YTERSEKSYELQTPFEIKLAKKFDTFNGECPNFVFPPLNSIIKTIQPRVEKKKLDGFMGRI  
EPI\_ISL\_424224 1 -----  
EPI\_ISL\_424255 1 -----  
EPI\_ISL\_425501 1 -----  
EPI\_ISL\_425502 1 -----  
EPI\_ISL\_425504 1 -----  
EPI\_ISL\_425523 1 -----  
EPI\_ISL\_425535 1 -----  
EPI\_ISL\_425537 1 -----  
EPI\_ISL\_425549 1 -----  
EPI\_ISL\_425551 1 -----  
EPI\_ISL\_425562 1 -----  
EPI\_ISL\_425576 1 -----  
EPI\_ISL\_425586 1 -----  
EPI\_ISL\_425587 1 -----  
EPI\_ISL\_426817 1 -----  
EPI\_ISL\_426832 1 -----

ORF1ab 301 RSVYPVASPNECNQMCLSTLMKCDHCGETSWQTDGDFVKATCEFCGTENLTKEGATTCGYL  
EPI\_ISL\_424224 1 -----  
EPI\_ISL\_424255 1 -----  
EPI\_ISL\_425501 1 -----  
EPI\_ISL\_425502 1 -----  
EPI\_ISL\_425504 1 -----  
EPI\_ISL\_425523 1 -----  
EPI\_ISL\_425535 1 -----  
EPI\_ISL\_425537 1 -----  
EPI\_ISL\_425549 1 -----  
EPI\_ISL\_425551 1 -----  
EPI\_ISL\_425562 1 -----  
EPI\_ISL\_425576 1 -----  
EPI\_ISL\_425586 1 -----  
EPI\_ISL\_425587 1 -----  
EPI\_ISL\_426817 1 -----  
EPI\_ISL\_426832 1 -----

ORF1ab 361 PQNAVVKIYCPACHNSEVGPESHSLAEYHNESGLKTIILRKGGRRTIAFGGCVFSYVGCHNKC  
EPI\_ISL\_424224 1 -----  
EPI\_ISL\_424255 1 -----  
EPI\_ISL\_425501 1 -----  
EPI\_ISL\_425502 1 -----  
EPI\_ISL\_425504 1 -----  
EPI\_ISL\_425523 1 -----  
EPI\_ISL\_425535 1 -----  
EPI\_ISL\_425537 1 -----  
EPI\_ISL\_425549 1 -----  
EPI\_ISL\_425551 1 -----  
EPI\_ISL\_425562 1 -----  
EPI\_ISL\_425576 1 -----  
EPI\_ISL\_425586 1 -----  
EPI\_ISL\_425587 1 -----  
EPI\_ISL\_426817 1 -----  
EPI\_ISL\_426832 1 -----

ORF1ab 421 AYWVPRASANIGCNHTGVVGESEGLNDNLLEILQKEKVNINIVGDFKLNEEIAIILASF  
EPI\_ISL\_424224 1 -----  
EPI\_ISL\_424255 1 -----  
EPI\_ISL\_425501 1 -----  
EPI\_ISL\_425502 1 -----  
EPI\_ISL\_425504 1 -----  
EPI\_ISL\_425523 1 -----  
EPI\_ISL\_425535 1 -----  
EPI\_ISL\_425537 1 -----  
EPI\_ISL\_425549 1 -----  
EPI\_ISL\_425551 1 -----  
EPI\_ISL\_425562 1 -----  
EPI\_ISL\_425576 1 -----  
EPI\_ISL\_425586 1 -----  
EPI\_ISL\_425587 1 -----  
EPI\_ISL\_426817 1 -----  
EPI\_ISL\_426832 1 -----

ORF1ab 481 SASTSAFVETVKGLDYKAFKQIVESCNGFKVTKGKAKKGAWNIGEQKSILSPLYAFASEA  
EPI\_ISL\_424224 1 -----  
EPI\_ISL\_424255 1 -----  
EPI\_ISL\_425501 1 -----  
EPI\_ISL\_425502 1 -----  
EPI\_ISL\_425504 1 -----  
EPI\_ISL\_425523 1 -----  
EPI\_ISL\_425535 1 -----  
EPI\_ISL\_425537 1 -----  
EPI\_ISL\_425549 1 -----  
EPI\_ISL\_425551 1 -----  
EPI\_ISL\_425562 1 -----  
EPI\_ISL\_425576 1 -----  
EPI\_ISL\_425586 1 -----  
EPI\_ISL\_425587 1 -----  
EPI\_ISL\_426817 1 -----  
EPI\_ISL\_426832 1 -----

ORF1ab 541 ARVVRISIFSRTLETAQNSVRVLQKAAITILDGISQYSLRLIDAMMFTSDLATNNLVVMAY  
EPI\_ISL\_424224 1 -----  
EPI\_ISL\_424255 1 -----  
EPI\_ISL\_425501 1 -----  
EPI\_ISL\_425502 1 -----  
EPI\_ISL\_425504 1 -----  
EPI\_ISL\_425523 1 -----  
EPI\_ISL\_425535 1 -----  
EPI\_ISL\_425537 1 -----  
EPI\_ISL\_425549 1 -----  
EPI\_ISL\_425551 1 -----  
EPI\_ISL\_425562 1 -----  
EPI\_ISL\_425576 1 -----  
EPI\_ISL\_425586 1 -----  
EPI\_ISL\_425587 1 -----  
EPI\_ISL\_426817 1 -----  
EPI\_ISL\_426832 1 -----

ORF1ab 601 ITGGVVQLTSQWL TNIFGTVYEKLPVLDWLEEKFKEGVEFLRDGWEIVKFI STCACEIV  
EPI\_ISL\_424224 1 -----  
EPI\_ISL\_424255 1 -----  
EPI\_ISL\_425501 1 -----  
EPI\_ISL\_425502 1 -----  
EPI\_ISL\_425504 1 -----  
EPI\_ISL\_425523 1 -----  
EPI\_ISL\_425535 1 -----  
EPI\_ISL\_425537 1 -----

|                |   |       |
|----------------|---|-------|
| EPI_ISL_425549 | 1 | ----- |
| EPI_ISL_425551 | 1 | ----- |
| EPI_ISL_425562 | 1 | ----- |
| EPI_ISL_425576 | 1 | ----- |
| EPI_ISL_425586 | 1 | ----- |
| EPI_ISL_425587 | 1 | ----- |
| EPI_ISL_426817 | 1 | ----- |
| EPI_ISL_426832 | 1 | ----- |

ORF1ab 661 GGQIVTCAKEIKESVQTFFFKLVNKFLALCADSIIIGGAKLKALNLGETFVTHSKGLYRKC  
EPI\_ISL\_424224 1 -----  
EPI\_ISL\_424255 1 -----  
EPI\_ISL\_425501 1 -----  
EPI\_ISL\_425502 1 -----  
EPI\_ISL\_425504 1 -----  
EPI\_ISL\_425523 1 -----  
EPI\_ISL\_425535 1 -----  
EPI\_ISL\_425537 1 -----  
EPI\_ISL\_425549 1 -----  
EPI\_ISL\_425551 1 -----  
EPI\_ISL\_425562 1 -----  
EPI\_ISL\_425576 1 -----  
EPI\_ISL\_425586 1 -----  
EPI\_ISL\_425587 1 -----  
EPI\_ISL\_426817 1 -----  
EPI\_ISL\_426832 1 -----

ORF1ab 721 VKSREETGLLMPLKAPKEIIFLEGETLPTEVLTEEVVLKGTGDLQPLEQPTSEAVEAPLVG  
EPI\_ISL\_424224 1 -----  
EPI\_ISL\_424255 1 -----  
EPI\_ISL\_425501 1 -----  
EPI\_ISL\_425502 1 -----  
EPI\_ISL\_425504 1 -----  
EPI\_ISL\_425523 1 -----  
EPI\_ISL\_425535 1 -----  
EPI\_ISL\_425537 1 -----  
EPI\_ISL\_425549 1 -----  
EPI\_ISL\_425551 1 -----  
EPI\_ISL\_425562 1 -----  
EPI\_ISL\_425576 1 -----  
EPI\_ISL\_425586 1 -----  
EPI\_ISL\_425587 1 -----  
EPI\_ISL\_426817 1 -----  
EPI\_ISL\_426832 1 -----

ORF1ab 781 TPVCINGLMLLEIKDTEKYCALAPNMMVTNNTFTLKGGAPTKVTFGDDTVIEVQGYKSVN  
EPI\_ISL\_424224 1 -----APTKVTFGDDTVIEVQGYKSVN  
EPI\_ISL\_424255 1 -----APTKVTFGDDTVIEVQGYKSVN  
EPI\_ISL\_425501 1 -----APTKVTFGDDTVIEVQGYKSVN  
EPI\_ISL\_425502 1 -----APTKVTFGDDTVIEVQGYKSVN  
EPI\_ISL\_425504 1 -----APTKVTFGDDTVIEVQGYKSVN  
EPI\_ISL\_425523 1 -----APTKVTFGDDTVIEVQGYKSVN  
EPI\_ISL\_425535 1 -----APTKVTFGDDTVIEVQGYKSVN  
EPI\_ISL\_425537 1 -----APTKVTFGDDTVIEVQGYKSVN  
EPI\_ISL\_425549 1 -----APTKVTFGDDTVIEVQGYKSVN  
EPI\_ISL\_425551 1 -----APTKVTFGDDTVIEVQGYKSVN  
EPI\_ISL\_425562 1 -----APTKVTFGDDTVIEVQGYKSVN  
EPI\_ISL\_425576 1 -----APTKVTFGDDTVIEVQGYKSVN  
EPI\_ISL\_425586 1 -----APTKVTFGDDTVIEVQGYKSVN  
EPI\_ISL\_425587 1 -----APTKVTFGDDTVIEVQGYKSVN  
EPI\_ISL\_426817 1 -----APTKVTFGDDTVIEVQGYKSVN  
EPI\_ISL\_426832 1 -----APTKVTFGDDTVIEVQGYKSVN



|                |     |                                                             |
|----------------|-----|-------------------------------------------------------------|
| EPI_ISL_425549 | 203 | QTIEVNSFSGYLKLTDNVYIKNADIVEEAKVKPTVVVNAANVYLKHGGGVAGALNKATN |
| EPI_ISL_425551 | 203 | QTIEVNSFSGYLKLTDNVYIKNADIVEEAKVKPTVVVNAANVYLKHGGGVAGALNKATN |
| EPI_ISL_425562 | 203 | QTIEVNSFSGYLKLTDNVYIKNADIVEEAKVKPTVVVNAANVYLKHGGGVAGALNKATN |
| EPI_ISL_425576 | 203 | QTIEVNSFSGYLKLTDNVYIKNADIVEEAKVKPTVVVNAANVYLKHGGGVAGALNKATN |
| EPI_ISL_425586 | 203 | QTIEVNSFSGYLKLTDNVYIKNADIVEEAKVKPTVVVNAANVYLKHGGGVAGALNKATN |
| EPI_ISL_425587 | 203 | QTIEVNSFSGYLKLTDNVYIKNADIVEEAKVKPTVVVNAANVYLKHGGGVAGALNKATN |
| EPI_ISL_426817 | 203 | QTIEVNSFSGYLKLTDNVYIKNADIVEEAKVKPTVVVNAANVYLKHGGGVAGALNKATN |
| EPI_ISL_426832 | 203 | QTIEVNSFSGYLKLTDNVYIKNADIVEEAKVKPTVVVNAANVYLKHGGGVAGALNKATN |







|                |     |                                                              |
|----------------|-----|--------------------------------------------------------------|
| EPI_ISL_425549 | 623 | LNETLVTMPLGYVTHGLNLEEAARYMRSLKVPATVSVSSPDAVTAYNGYLTSSSKTPEEH |
| EPI_ISL_425551 | 623 | LNETLVTMPLGYVTHGLNLEEAARYMRSLKVPATVSVSSPDAVTAYNGYLTSSSKTPEEH |
| EPI_ISL_425562 | 623 | LNETLVTMPLGYVTHGLNLEEAARYMRSLKVPATVSVSSPDAVTAYNGYLTSSSKTPEEH |
| EPI_ISL_425576 | 623 | LNETLVTMPLGYVTHGLNLEEAARYMRSLKVPATVSVSSPDAVTAYNGYLTSSSKTPEEH |
| EPI_ISL_425586 | 623 | LNETLVTMPLGYVTHGLNLEEAARYMRSLKVPATVSVSSPDAVTAYNGYLTSSSKTPEEH |
| EPI_ISL_425587 | 623 | LNETLVTMPLGYVTHGLNLEEAARYMRSLKVPATVSVSSPDAVTAYNGYLTSSSKTPEEH |
| EPI_ISL_426817 | 623 | LNETLVTMPLGYVTHGLNLEEAARYMRSLKVPATVSVSSPDAVTAYNGYLTSSSKTPEEH |
| EPI_ISL_426832 | 623 | LNETLVTMPLGYVTHGLNLEEAARYMRSLKVPATVSVSSPDAVTAYNGYLTSSSKTPEEH |





|                |      |                                                              |
|----------------|------|--------------------------------------------------------------|
| EPI_ISL_425549 | 1043 | GPITDVFYKENSYTTTIKPVTYKLDGVVCTEIDPKLDNYYKKDNSYFTEQPIDLVPNQPY |
| EPI_ISL_425551 | 1043 | GPITDVFYKENSYTTTIKPVTYKLDGVVCTEIDPKLDNYYKKDNSYFTEQPIDLVPNQPY |
| EPI_ISL_425562 | 1043 | GPITDVFYKENSYTTTIKPVTYKLDGVVCTEIDPKLDNYYKKDNSYFTEQPIDLVPNQPY |
| EPI_ISL_425576 | 1043 | GPITDVFYKENSYTTTIKPVTYKLDGVVCTEIDPKLDNYYKKDNSYFTEQPIDLVPNQPY |
| EPI_ISL_425586 | 1043 | GPITDVFYKENSYTTTIKPVTYKLDGVVCTEIDPKLDNYYKKDNSYFTEQPIDLVPNQPY |
| EPI_ISL_425587 | 1043 | GPITDVFYKENSYTTTIKPVTYKLDGVVCTEIDPKLDNYYKKDNSYFTEQPIDLVPNQPY |
| EPI_ISL_426817 | 1043 | GPITDVFYKENSYTTTIKPVTYKLDGVVCTEIDPKLDNYYKKDNSYFTEQPIDLVPNQPY |
| EPI_ISL_426832 | 1043 | GPITDVFYKENSYTTTIKPVTYKLDGVVCTEIDPKLDNYYKKDNSYFTEQPIDLVPNQPY |





EPI\_ISL\_425549 1463 YCTGSIPCSVCLSGLDSDTYPSELETIQITISSFKWDLTAFGLVAEWFLAYILFTRFFYV  
EPI\_ISL\_425551 1463 YCTGSIPCSVCLSGLDSDTYPSELETIQITISSFKWDLTAFGLVAEWFLAYILFTRFFYV  
EPI\_ISL\_425562 1463 YCTGSIPCSVCLSGLDSDTYPSELETIQITISSFKWDLTAFGLVAEWFLAYILFTRFFYV  
EPI\_ISL\_425576 1463 YCTGSIPCSVCLSGLDSDTYPSELETIQITISSFKWDLTAFGLVAEWFLAYILFTRFFYV  
EPI\_ISL\_425586 1463 YCTGSIPCSVCLSGLDSDTYPSELETIQITISSFKWDLTAFGLVAEWFLAYILFTRFFYV  
EPI\_ISL\_425587 1463 YCTGSIPCSVCLSGLDSDTYPSELETIQITISSFKWDLTAFGLVAEWFLAYILFTRFFYV  
EPI\_ISL\_426817 1463 YCTGSIPCSVCLSGLDSDTYPSELETIQITISSFKWDLTAFGLVAEWFLAYILFTRFFYV  
EPI\_ISL\_426832 1463 YCTGSIPCSVCLSGLDSDTYPSELETIQITISSFKWDLTAFGLVAEWFLAYILFTRFFYV







|                |      |                                                             |
|----------------|------|-------------------------------------------------------------|
| EPI_ISL_425549 | 1883 | AQVAKSHNIALIWNVKDFMSLSEQLRKQIRSAAKKNNLPFKLTCATTRQVNVVTTKIAL |
| EPI_ISL_425551 | 1883 | AQVAKSHNIALIWNVKDFMSLSEQLRKQIRSAAKKNNLPFKLTCATTRQVNVVTTKIAL |
| EPI_ISL_425562 | 1883 | AQVAKSHNIALIWNVKDFMSLSEQLRKQIRSAAKKNNLPFKLTCATTRQVNVVTTKIAL |
| EPI_ISL_425576 | 1883 | AQVAKSHNIALIWNVKDFMSLSEQLRKQIRSAAKKNNLPFKLTCATTRQVNVVTTKIAL |
| EPI_ISL_425586 | 1883 | AQVAKSHNIALIWNVKDFMSLSEQLRKQIRSAAKKNNLPFKLTCATTRQVNVVTTKIAL |
| EPI_ISL_425587 | 1883 | AQVAKSHNIALIWNVKDFMSLSEQLRKQIRSAAKKNNLPFKLTCATTRQVNVVTTKIAL |
| EPI_ISL_426817 | 1883 | AQVAKSHNIALIWNVKDFMSLSEQLRKQIRSAAKKNNLPFKLTCATTRQVNVVTTKIAL |
| EPI_ISL_426832 | 1883 | AQVAKSHNIALIWNVKDFMSLSEQLRKQIRSAAKKNNLPFKLTCATTRQVNVVTTKIAL |

ORF1ab 2761 KGGKIVNNWLKQLIKVTLVFLFVAAIFYLITPVHVMKHTDFSSEIIGYKAIDGGVTRDI  
EPI\_ISL\_424224 1943 KGG-----  
EPI\_ISL\_424255 1943 KGG-----  
EPI\_ISL\_425501 1943 KGG-----  
EPI\_ISL\_425502 1943 KGG-----  
EPI\_ISL\_425504 1943 KGG-----  
EPI\_ISL\_425523 1943 KGG-----  
EPI\_ISL\_425535 1943 KGG-----  
EPI\_ISL\_425537 1943 KGG-----  
EPI\_ISL\_425549 1943 KGG-----  
EPI\_ISL\_425551 1943 KGG-----  
EPI\_ISL\_425562 1943 KGG-----  
EPI\_ISL\_425576 1943 KGG-----  
EPI\_ISL\_425586 1943 KGG-----  
EPI\_ISL\_425587 1943 KGG-----  
EPI\_ISL\_426817 1943 KGG-----  
EPI\_ISL\_426832 1943 KGG-----

ORF1ab 2821 ASTDTCFANKHADFDTWFSQRGGSYTNDKACPLIAAVITREVGFFVPLPGTILRTTNGD  
EPI\_ISL\_424224 -----  
EPI\_ISL\_424255 -----  
EPI\_ISL\_425501 -----  
EPI\_ISL\_425502 -----  
EPI\_ISL\_425504 -----  
EPI\_ISL\_425523 -----  
EPI\_ISL\_425535 -----  
EPI\_ISL\_425537 -----  
EPI\_ISL\_425549 -----  
EPI\_ISL\_425551 -----  
EPI\_ISL\_425562 -----  
EPI\_ISL\_425576 -----  
EPI\_ISL\_425586 -----  
EPI\_ISL\_425587 -----  
EPI\_ISL\_426817 -----  
EPI\_ISL\_426832 -----

ORF1ab 2881 FLHFLPRVFSAVGNICYTPSKLIEYTDFAISACVLAAECTIFKSDASGKPPYCYDTNVLE  
EPI\_ISL\_424224 -----  
EPI\_ISL\_424255 -----  
EPI\_ISL\_425501 -----  
EPI\_ISL\_425502 -----  
EPI\_ISL\_425504 -----  
EPI\_ISL\_425523 -----  
EPI\_ISL\_425535 -----  
EPI\_ISL\_425537 -----  
EPI\_ISL\_425549 -----  
EPI\_ISL\_425551 -----  
EPI\_ISL\_425562 -----  
EPI\_ISL\_425576 -----  
EPI\_ISL\_425586 -----  
EPI\_ISL\_425587 -----  
EPI\_ISL\_426817 -----  
EPI\_ISL\_426832 -----

ORF1ab 2941 GSVAYESLRPDTRYVLM DGSIIQFPNTYLEGSRVVTTFDSEYCRHGTCERSEAGVCVST  
EPI\_ISL\_424224 -----  
EPI\_ISL\_424255 -----  
EPI\_ISL\_425501 -----  
EPI\_ISL\_425502 -----  
EPI\_ISL\_425504 -----  
EPI\_ISL\_425523 -----  
EPI\_ISL\_425535 -----  
EPI\_ISL\_425537 -----  
EPI\_ISL\_425549 -----  
EPI\_ISL\_425551 -----  
EPI\_ISL\_425562 -----  
EPI\_ISL\_425576 -----  
EPI\_ISL\_425586 -----  
EPI\_ISL\_425587 -----  
EPI\_ISL\_426817 -----  
EPI\_ISL\_426832 -----

ORF1ab 3001 SGRWVLNNDYYRSLPGVFCGVDAVNLLTNMFTPLIQPIGALDISASIVAGGIVAIIVVTCL  
EPI\_ISL\_424224 -----  
EPI\_ISL\_424255 -----  
EPI\_ISL\_425501 -----  
EPI\_ISL\_425502 -----  
EPI\_ISL\_425504 -----  
EPI\_ISL\_425523 -----  
EPI\_ISL\_425535 -----  
EPI\_ISL\_425537 -----  
EPI\_ISL\_425549 -----  
EPI\_ISL\_425551 -----  
EPI\_ISL\_425562 -----  
EPI\_ISL\_425576 -----  
EPI\_ISL\_425586 -----  
EPI\_ISL\_425587 -----  
EPI\_ISL\_426817 -----  
EPI\_ISL\_426832 -----

ORF1ab 3061 AYYFMRFRRAFGEYSHVAVFNTLLFLMSFTVLCLTPVYSFLPGVYSVIYLYLTFYLTNDV  
EPI\_ISL\_424224 -----  
EPI\_ISL\_424255 -----  
EPI\_ISL\_425501 -----  
EPI\_ISL\_425502 -----  
EPI\_ISL\_425504 -----  
EPI\_ISL\_425523 -----  
EPI\_ISL\_425535 -----  
EPI\_ISL\_425537 -----  
EPI\_ISL\_425549 -----  
EPI\_ISL\_425551 -----  
EPI\_ISL\_425562 -----  
EPI\_ISL\_425576 -----  
EPI\_ISL\_425586 -----  
EPI\_ISL\_425587 -----  
EPI\_ISL\_426817 -----  
EPI\_ISL\_426832 -----

ORF1ab 3121 SFLAHIQWMVMFTPLVPFWITIAIYIICISTKHFYWFFSNYLKRRVVFNGVSFSTFEEAAL  
EPI\_ISL\_424224 -----  
EPI\_ISL\_424255 -----  
EPI\_ISL\_425501 -----  
EPI\_ISL\_425502 -----  
EPI\_ISL\_425504 -----  
EPI\_ISL\_425523 -----  
EPI\_ISL\_425535 -----  
EPI\_ISL\_425537 -----

EPI\_ISL\_425549  
EPI\_ISL\_425551  
EPI\_ISL\_425562  
EPI\_ISL\_425576  
EPI\_ISL\_425586  
EPI\_ISL\_425587  
EPI\_ISL\_426817  
EPI\_ISL\_426832

-----  
-----  
-----  
-----  
-----  
-----  
-----  
-----

ORF1ab 3181 CTFLLNKEMYLKLRSDVLLPLTQYNRYLALYNKYKYFSGAMDTTSYREAACCHLAKALND  
EPI\_ISL\_424224 -----  
EPI\_ISL\_424255 -----  
EPI\_ISL\_425501 -----  
EPI\_ISL\_425502 -----  
EPI\_ISL\_425504 -----  
EPI\_ISL\_425523 -----  
EPI\_ISL\_425535 -----  
EPI\_ISL\_425537 -----  
EPI\_ISL\_425549 -----  
EPI\_ISL\_425551 -----  
EPI\_ISL\_425562 -----  
EPI\_ISL\_425576 -----  
EPI\_ISL\_425586 -----  
EPI\_ISL\_425587 -----  
EPI\_ISL\_426817 -----  
EPI\_ISL\_426832 -----

ORF1ab 3241 FSNSGSDVLYQPPQTSITSAVLQSGFRKMAFP SGKVEGCMVQVTCGTTTTLNGLWLDDVVY  
EPI\_ISL\_424224 -----  
EPI\_ISL\_424255 -----  
EPI\_ISL\_425501 -----  
EPI\_ISL\_425502 -----  
EPI\_ISL\_425504 -----  
EPI\_ISL\_425523 -----  
EPI\_ISL\_425535 -----  
EPI\_ISL\_425537 -----  
EPI\_ISL\_425549 -----  
EPI\_ISL\_425551 -----  
EPI\_ISL\_425562 -----  
EPI\_ISL\_425576 -----  
EPI\_ISL\_425586 -----  
EPI\_ISL\_425587 -----  
EPI\_ISL\_426817 -----  
EPI\_ISL\_426832 -----

ORF1ab 3301 CPRHVICTSEDMLNPNYEDLLIRKSNHNFLVQAGNVQLRVIGHSMQNCVLKLVDTANPK  
EPI\_ISL\_424224 -----  
EPI\_ISL\_424255 -----  
EPI\_ISL\_425501 -----  
EPI\_ISL\_425502 -----  
EPI\_ISL\_425504 -----  
EPI\_ISL\_425523 -----  
EPI\_ISL\_425535 -----  
EPI\_ISL\_425537 -----  
EPI\_ISL\_425549 -----  
EPI\_ISL\_425551 -----  
EPI\_ISL\_425562 -----  
EPI\_ISL\_425576 -----  
EPI\_ISL\_425586 -----  
EPI\_ISL\_425587 -----  
EPI\_ISL\_426817 -----  
EPI\_ISL\_426832 -----

ORF1ab 3361 TPKYKFVRIQPGQTFVSLACYNGSPSGVYQCAMRPNFTIKGSFLNGSCGSSVGFNIDYDCV  
EPI\_ISL\_424224 -----  
EPI\_ISL\_424255 -----  
EPI\_ISL\_425501 -----  
EPI\_ISL\_425502 -----  
EPI\_ISL\_425504 -----  
EPI\_ISL\_425523 -----  
EPI\_ISL\_425535 -----  
EPI\_ISL\_425537 -----  
EPI\_ISL\_425549 -----  
EPI\_ISL\_425551 -----  
EPI\_ISL\_425562 -----  
EPI\_ISL\_425576 -----  
EPI\_ISL\_425586 -----  
EPI\_ISL\_425587 -----  
EPI\_ISL\_426817 -----  
EPI\_ISL\_426832 -----

ORF1ab 3421 SFCYMHHMELPTGVHAGTDLEGNFYGPFVDRQTAQAAGTDTTITVNVVLAWLYAAVINGDR  
EPI\_ISL\_424224 -----  
EPI\_ISL\_424255 -----  
EPI\_ISL\_425501 -----  
EPI\_ISL\_425502 -----  
EPI\_ISL\_425504 -----  
EPI\_ISL\_425523 -----  
EPI\_ISL\_425535 -----  
EPI\_ISL\_425537 -----  
EPI\_ISL\_425549 -----  
EPI\_ISL\_425551 -----  
EPI\_ISL\_425562 -----  
EPI\_ISL\_425576 -----  
EPI\_ISL\_425586 -----  
EPI\_ISL\_425587 -----  
EPI\_ISL\_426817 -----  
EPI\_ISL\_426832 -----

ORF1ab 3481 WFLNRFTTTLNDFNLVAMKYNYEPLTQDHVDILGPLSAQTGIAVLDMCASLKELLQNGMN  
EPI\_ISL\_424224 -----  
EPI\_ISL\_424255 -----  
EPI\_ISL\_425501 -----  
EPI\_ISL\_425502 -----  
EPI\_ISL\_425504 -----  
EPI\_ISL\_425523 -----  
EPI\_ISL\_425535 -----  
EPI\_ISL\_425537 -----  
EPI\_ISL\_425549 -----  
EPI\_ISL\_425551 -----  
EPI\_ISL\_425562 -----  
EPI\_ISL\_425576 -----  
EPI\_ISL\_425586 -----  
EPI\_ISL\_425587 -----  
EPI\_ISL\_426817 -----  
EPI\_ISL\_426832 -----

ORF1ab 3541 GRTILGSALLEDEFPPFDVVRQCSGVTFSQSAVKRTIKGTHHWLLLTLTSLLLVLVQSTQW  
EPI\_ISL\_424224 -----  
EPI\_ISL\_424255 -----  
EPI\_ISL\_425501 -----  
EPI\_ISL\_425502 -----  
EPI\_ISL\_425504 -----  
EPI\_ISL\_425523 -----  
EPI\_ISL\_425535 -----  
EPI\_ISL\_425537 -----

EPI\_ISL\_425549  
EPI\_ISL\_425551  
EPI\_ISL\_425562  
EPI\_ISL\_425576  
EPI\_ISL\_425586  
EPI\_ISL\_425587  
EPI\_ISL\_426817  
EPI\_ISL\_426832

-----  
-----  
-----  
-----  
-----  
-----  
-----  
-----



ORF1ab 3601 SLFFFLYENAF L P F A M G I I A M S A F A M M F V K H K H A F L C L F L L P S L A T V A Y F N M V Y M P A S W V  
EPI\_ISL\_424224 -----  
EPI\_ISL\_424255 -----  
EPI\_ISL\_425501 -----  
EPI\_ISL\_425502 -----  
EPI\_ISL\_425504 -----  
EPI\_ISL\_425523 -----  
EPI\_ISL\_425535 -----  
EPI\_ISL\_425537 -----  
EPI\_ISL\_425549 -----  
EPI\_ISL\_425551 -----  
EPI\_ISL\_425562 -----  
EPI\_ISL\_425576 -----  
EPI\_ISL\_425586 -----  
EPI\_ISL\_425587 -----  
EPI\_ISL\_426817 -----  
EPI\_ISL\_426832 -----

ORF1ab 3661 M R I M T W L D M V D T S L S G F K L K D C V M Y A S A V V L L I L M T A R T V Y D D G A R R V W T L M N V L T L V Y K  
EPI\_ISL\_424224 -----  
EPI\_ISL\_424255 -----  
EPI\_ISL\_425501 -----  
EPI\_ISL\_425502 -----  
EPI\_ISL\_425504 -----  
EPI\_ISL\_425523 -----  
EPI\_ISL\_425535 -----  
EPI\_ISL\_425537 -----  
EPI\_ISL\_425549 -----  
EPI\_ISL\_425551 -----  
EPI\_ISL\_425562 -----  
EPI\_ISL\_425576 -----  
EPI\_ISL\_425586 -----  
EPI\_ISL\_425587 -----  
EPI\_ISL\_426817 -----  
EPI\_ISL\_426832 -----

ORF1ab 3721 V Y Y G N A L D Q A I S M W A L I I S V T S N Y S G V V T T V M F L A R G I V F M C V E Y C P I F F I T G N T L Q C I M  
EPI\_ISL\_424224 -----  
EPI\_ISL\_424255 -----  
EPI\_ISL\_425501 -----  
EPI\_ISL\_425502 -----  
EPI\_ISL\_425504 -----  
EPI\_ISL\_425523 -----  
EPI\_ISL\_425535 -----  
EPI\_ISL\_425537 -----  
EPI\_ISL\_425549 -----  
EPI\_ISL\_425551 -----  
EPI\_ISL\_425562 -----  
EPI\_ISL\_425576 -----  
EPI\_ISL\_425586 -----  
EPI\_ISL\_425587 -----  
EPI\_ISL\_426817 -----  
EPI\_ISL\_426832 -----

ORF1ab 3781 LVYCFLGYFCTCYFGLFCLLNRYFRLTLGVYDYLSTQEFRYMNSQGLLPPKNSIDAFKL  
EPI\_ISL\_424224 -----  
EPI\_ISL\_424255 -----  
EPI\_ISL\_425501 -----  
EPI\_ISL\_425502 -----  
EPI\_ISL\_425504 -----  
EPI\_ISL\_425523 -----  
EPI\_ISL\_425535 -----  
EPI\_ISL\_425537 -----  
EPI\_ISL\_425549 -----  
EPI\_ISL\_425551 -----  
EPI\_ISL\_425562 -----  
EPI\_ISL\_425576 -----  
EPI\_ISL\_425586 -----  
EPI\_ISL\_425587 -----  
EPI\_ISL\_426817 -----  
EPI\_ISL\_426832 -----

ORF1ab 3841 NIKLLGVGGKPCIKVATVQSKMSDVKCTSVVLLSVLQQLRVESSSKLWAQCVQLHNDILL  
EPI\_ISL\_424224 -----  
EPI\_ISL\_424255 -----  
EPI\_ISL\_425501 -----  
EPI\_ISL\_425502 -----  
EPI\_ISL\_425504 -----  
EPI\_ISL\_425523 -----  
EPI\_ISL\_425535 -----  
EPI\_ISL\_425537 -----  
EPI\_ISL\_425549 -----  
EPI\_ISL\_425551 -----  
EPI\_ISL\_425562 -----  
EPI\_ISL\_425576 -----  
EPI\_ISL\_425586 -----  
EPI\_ISL\_425587 -----  
EPI\_ISL\_426817 -----  
EPI\_ISL\_426832 -----

ORF1ab 3901 AKDTTEAFEKMVSLLSVLLSMQGAVDINKLCEEMLDNRATLQAIASEFSSLPSYAAFATA  
EPI\_ISL\_424224 -----  
EPI\_ISL\_424255 -----  
EPI\_ISL\_425501 -----  
EPI\_ISL\_425502 -----  
EPI\_ISL\_425504 -----  
EPI\_ISL\_425523 -----  
EPI\_ISL\_425535 -----  
EPI\_ISL\_425537 -----  
EPI\_ISL\_425549 -----  
EPI\_ISL\_425551 -----  
EPI\_ISL\_425562 -----  
EPI\_ISL\_425576 -----  
EPI\_ISL\_425586 -----  
EPI\_ISL\_425587 -----  
EPI\_ISL\_426817 -----  
EPI\_ISL\_426832 -----

ORF1ab 3961 QEAYEQAVANGDSEVVLKLLKSLNVAKSEFDRDAAMQRKLEKMDAQAMTQMYKQARSED  
EPI\_ISL\_424224 -----  
EPI\_ISL\_424255 -----  
EPI\_ISL\_425501 -----  
EPI\_ISL\_425502 -----  
EPI\_ISL\_425504 -----  
EPI\_ISL\_425523 -----  
EPI\_ISL\_425535 -----  
EPI\_ISL\_425537 -----

EPI\_ISL\_425549  
EPI\_ISL\_425551  
EPI\_ISL\_425562  
EPI\_ISL\_425576  
EPI\_ISL\_425586  
EPI\_ISL\_425587  
EPI\_ISL\_426817  
EPI\_ISL\_426832

-----  
-----  
-----  
-----  
-----  
-----  
-----  
-----

ORF1ab 4021 KRAKVTSAMQTMLFTMLRKLNDNDALNNIINNARDGCVPLNIIPLTTAAKLMVVIPDYNTY  
EPI\_ISL\_424224 -----  
EPI\_ISL\_424255 -----  
EPI\_ISL\_425501 -----  
EPI\_ISL\_425502 -----  
EPI\_ISL\_425504 -----  
EPI\_ISL\_425523 -----  
EPI\_ISL\_425535 -----  
EPI\_ISL\_425537 -----  
EPI\_ISL\_425549 -----  
EPI\_ISL\_425551 -----  
EPI\_ISL\_425562 -----  
EPI\_ISL\_425576 -----  
EPI\_ISL\_425586 -----  
EPI\_ISL\_425587 -----  
EPI\_ISL\_426817 -----  
EPI\_ISL\_426832 -----

ORF1ab 4081 KNTCDGTTFTYASALWEIQQVVDADSKIVQLSEISMDNSPNLAWPLIVTALRANSVAVKLO  
EPI\_ISL\_424224 -----  
EPI\_ISL\_424255 -----  
EPI\_ISL\_425501 -----  
EPI\_ISL\_425502 -----  
EPI\_ISL\_425504 -----  
EPI\_ISL\_425523 -----  
EPI\_ISL\_425535 -----  
EPI\_ISL\_425537 -----  
EPI\_ISL\_425549 -----  
EPI\_ISL\_425551 -----  
EPI\_ISL\_425562 -----  
EPI\_ISL\_425576 -----  
EPI\_ISL\_425586 -----  
EPI\_ISL\_425587 -----  
EPI\_ISL\_426817 -----  
EPI\_ISL\_426832 -----

ORF1ab 4141 NNELSPVALRQMSCAAGTTQTACTDDNALAYYNTTKGGRFVLALLSDLQDLKWARFPKSD  
EPI\_ISL\_424224 -----  
EPI\_ISL\_424255 -----  
EPI\_ISL\_425501 -----  
EPI\_ISL\_425502 -----  
EPI\_ISL\_425504 -----  
EPI\_ISL\_425523 -----  
EPI\_ISL\_425535 -----  
EPI\_ISL\_425537 -----  
EPI\_ISL\_425549 -----  
EPI\_ISL\_425551 -----  
EPI\_ISL\_425562 -----  
EPI\_ISL\_425576 -----  
EPI\_ISL\_425586 -----  
EPI\_ISL\_425587 -----  
EPI\_ISL\_426817 -----  
EPI\_ISL\_426832 -----

ORF1ab 4201 GTGTIYTELEPPCRFVTDTPKGPVKYLYFIKGLNNLNRMVLSLAATVRLQAGNATEV  
EPI\_ISL\_424224 -----  
EPI\_ISL\_424255 -----  
EPI\_ISL\_425501 -----  
EPI\_ISL\_425502 -----  
EPI\_ISL\_425504 -----  
EPI\_ISL\_425523 -----  
EPI\_ISL\_425535 -----  
EPI\_ISL\_425537 -----  
EPI\_ISL\_425549 -----  
EPI\_ISL\_425551 -----  
EPI\_ISL\_425562 -----  
EPI\_ISL\_425576 -----  
EPI\_ISL\_425586 -----  
EPI\_ISL\_425587 -----  
EPI\_ISL\_426817 -----  
EPI\_ISL\_426832 -----

ORF1ab 4261 PANSTVLSFCAFAVDAAKAYKDYLASGGQPITNCVKMLCTHTGTGQAITVTPEANMDQES  
EPI\_ISL\_424224 -----  
EPI\_ISL\_424255 -----  
EPI\_ISL\_425501 -----  
EPI\_ISL\_425502 -----  
EPI\_ISL\_425504 -----  
EPI\_ISL\_425523 -----  
EPI\_ISL\_425535 -----  
EPI\_ISL\_425537 -----  
EPI\_ISL\_425549 -----  
EPI\_ISL\_425551 -----  
EPI\_ISL\_425562 -----  
EPI\_ISL\_425576 -----  
EPI\_ISL\_425586 -----  
EPI\_ISL\_425587 -----  
EPI\_ISL\_426817 -----  
EPI\_ISL\_426832 -----

ORF1ab 4321 FGGASCCLYCRCHIDHPNPKGFCDLKGKYVQIPTTCANDPVGFTLKNVCTVCGMWKGYG  
EPI\_ISL\_424224 -----  
EPI\_ISL\_424255 -----  
EPI\_ISL\_425501 -----  
EPI\_ISL\_425502 -----  
EPI\_ISL\_425504 -----  
EPI\_ISL\_425523 -----  
EPI\_ISL\_425535 -----  
EPI\_ISL\_425537 -----  
EPI\_ISL\_425549 -----  
EPI\_ISL\_425551 -----  
EPI\_ISL\_425562 -----  
EPI\_ISL\_425576 -----  
EPI\_ISL\_425586 -----  
EPI\_ISL\_425587 -----  
EPI\_ISL\_426817 -----  
EPI\_ISL\_426832 -----

ORF1ab 4381 CSCDQLREPLQSDAQSFNLRVCGVSAARLTPCGTGTSTDVVYRAFDIYNDKVAGFAKF  
EPI\_ISL\_424224 -----  
EPI\_ISL\_424255 -----  
EPI\_ISL\_425501 -----  
EPI\_ISL\_425502 -----  
EPI\_ISL\_425504 -----  
EPI\_ISL\_425523 -----  
EPI\_ISL\_425535 -----  
EPI\_ISL\_425537 -----

EPI\_ISL\_425549  
EPI\_ISL\_425551  
EPI\_ISL\_425562  
EPI\_ISL\_425576  
EPI\_ISL\_425586  
EPI\_ISL\_425587  
EPI\_ISL\_426817  
EPI\_ISL\_426832

-----  
-----  
-----  
-----  
-----  
-----  
-----  
-----

ORF1ab 4441 LKTNCCRFQEKDEDDNLI DSYFVVKRHTFSNYQHEETIYNLLKDCPAVAKHDFKFRIDG  
EPI\_ISL\_424224 -----  
EPI\_ISL\_424255 -----  
EPI\_ISL\_425501 -----  
EPI\_ISL\_425502 -----  
EPI\_ISL\_425504 -----  
EPI\_ISL\_425523 -----  
EPI\_ISL\_425535 -----  
EPI\_ISL\_425537 -----  
EPI\_ISL\_425549 -----  
EPI\_ISL\_425551 -----  
EPI\_ISL\_425562 -----  
EPI\_ISL\_425576 -----  
EPI\_ISL\_425586 -----  
EPI\_ISL\_425587 -----  
EPI\_ISL\_426817 -----  
EPI\_ISL\_426832 -----

ORF1ab 4501 DMVPHISRQRLTKYTMADLVYALRHFDEGNCDTLKEILVTYNCCDDDYFNKKDWYDFVEN  
EPI\_ISL\_424224 -----  
EPI\_ISL\_424255 -----  
EPI\_ISL\_425501 -----  
EPI\_ISL\_425502 -----  
EPI\_ISL\_425504 -----  
EPI\_ISL\_425523 -----  
EPI\_ISL\_425535 -----  
EPI\_ISL\_425537 -----  
EPI\_ISL\_425549 -----  
EPI\_ISL\_425551 -----  
EPI\_ISL\_425562 -----  
EPI\_ISL\_425576 -----  
EPI\_ISL\_425586 -----  
EPI\_ISL\_425587 -----  
EPI\_ISL\_426817 -----  
EPI\_ISL\_426832 -----

ORF1ab 4561 PDILRVYANLGERVRQALLKT VQFC DAMRNAGIVGVLTLDNQDLNGNWYDFGDFIQTPG  
EPI\_ISL\_424224 -----  
EPI\_ISL\_424255 -----  
EPI\_ISL\_425501 -----  
EPI\_ISL\_425502 -----  
EPI\_ISL\_425504 -----  
EPI\_ISL\_425523 -----  
EPI\_ISL\_425535 -----  
EPI\_ISL\_425537 -----  
EPI\_ISL\_425549 -----  
EPI\_ISL\_425551 -----  
EPI\_ISL\_425562 -----  
EPI\_ISL\_425576 -----  
EPI\_ISL\_425586 -----  
EPI\_ISL\_425587 -----  
EPI\_ISL\_426817 -----  
EPI\_ISL\_426832 -----

ORF1ab 4621 SGVPVVDSSYSSLMPILTLTRALTAESHVDTDLTKPYIKWDLLKYDFTEERLKLFDYFK  
EPI\_ISL\_424224 -----  
EPI\_ISL\_424255 -----  
EPI\_ISL\_425501 -----  
EPI\_ISL\_425502 -----  
EPI\_ISL\_425504 -----  
EPI\_ISL\_425523 -----  
EPI\_ISL\_425535 -----  
EPI\_ISL\_425537 -----  
EPI\_ISL\_425549 -----  
EPI\_ISL\_425551 -----  
EPI\_ISL\_425562 -----  
EPI\_ISL\_425576 -----  
EPI\_ISL\_425586 -----  
EPI\_ISL\_425587 -----  
EPI\_ISL\_426817 -----  
EPI\_ISL\_426832 -----

ORF1ab 4681 YWDQTYHPNCVNCLDDRCILHCANFNVLVSTVFPPTSFGPLVRKIFVDGVPFVVSTGYHF  
EPI\_ISL\_424224 -----  
EPI\_ISL\_424255 -----  
EPI\_ISL\_425501 -----  
EPI\_ISL\_425502 -----  
EPI\_ISL\_425504 -----  
EPI\_ISL\_425523 -----  
EPI\_ISL\_425535 -----  
EPI\_ISL\_425537 -----  
EPI\_ISL\_425549 -----  
EPI\_ISL\_425551 -----  
EPI\_ISL\_425562 -----  
EPI\_ISL\_425576 -----  
EPI\_ISL\_425586 -----  
EPI\_ISL\_425587 -----  
EPI\_ISL\_426817 -----  
EPI\_ISL\_426832 -----

ORF1ab 4741 RELGVVHNQDVNLHSSRLSFKELLVYAADPAMHAASGNLLLDKRTTCFSVAALTNNVAFQ  
EPI\_ISL\_424224 -----  
EPI\_ISL\_424255 -----  
EPI\_ISL\_425501 -----  
EPI\_ISL\_425502 -----  
EPI\_ISL\_425504 -----  
EPI\_ISL\_425523 -----  
EPI\_ISL\_425535 -----  
EPI\_ISL\_425537 -----  
EPI\_ISL\_425549 -----  
EPI\_ISL\_425551 -----  
EPI\_ISL\_425562 -----  
EPI\_ISL\_425576 -----  
EPI\_ISL\_425586 -----  
EPI\_ISL\_425587 -----  
EPI\_ISL\_426817 -----  
EPI\_ISL\_426832 -----

ORF1ab 4801 TVKPGNFNKDFYDFAVSKGFFKEGSSVELKHFFFAQDGNAAISDYDYRYNLPMTCDIRQ  
EPI\_ISL\_424224 -----  
EPI\_ISL\_424255 -----  
EPI\_ISL\_425501 -----  
EPI\_ISL\_425502 -----  
EPI\_ISL\_425504 -----  
EPI\_ISL\_425523 -----  
EPI\_ISL\_425535 -----  
EPI\_ISL\_425537 -----



EPI\_ISL\_425549  
EPI\_ISL\_425551  
EPI\_ISL\_425562  
EPI\_ISL\_425576  
EPI\_ISL\_425586  
EPI\_ISL\_425587  
EPI\_ISL\_426817  
EPI\_ISL\_426832

-----  
-----  
-----  
-----  
-----  
-----  
-----  
-----

ORF1ab 4861 LLFVVEVVDKYFDCYDGGCINANQVIVNNLDKSAGFPFNKWKARLYYDSMSYEDQDALF  
EPI\_ISL\_424224 -----  
EPI\_ISL\_424255 -----  
EPI\_ISL\_425501 -----  
EPI\_ISL\_425502 -----  
EPI\_ISL\_425504 -----  
EPI\_ISL\_425523 -----  
EPI\_ISL\_425535 -----  
EPI\_ISL\_425537 -----  
EPI\_ISL\_425549 -----  
EPI\_ISL\_425551 -----  
EPI\_ISL\_425562 -----  
EPI\_ISL\_425576 -----  
EPI\_ISL\_425586 -----  
EPI\_ISL\_425587 -----  
EPI\_ISL\_426817 -----  
EPI\_ISL\_426832 -----

ORF1ab 4921 AYTKRNVIPTITQMNLYAISAKNRARTVAGVSICTMTNRQFHQKLLKSLAATRGATVV  
EPI\_ISL\_424224 -----  
EPI\_ISL\_424255 -----  
EPI\_ISL\_425501 -----  
EPI\_ISL\_425502 -----  
EPI\_ISL\_425504 -----  
EPI\_ISL\_425523 -----  
EPI\_ISL\_425535 -----  
EPI\_ISL\_425537 -----  
EPI\_ISL\_425549 -----  
EPI\_ISL\_425551 -----  
EPI\_ISL\_425562 -----  
EPI\_ISL\_425576 -----  
EPI\_ISL\_425586 -----  
EPI\_ISL\_425587 -----  
EPI\_ISL\_426817 -----  
EPI\_ISL\_426832 -----

ORF1ab 4981 IGTSKFYGGWHNMLKTVYSDVENPHLMGWDYPKCDRAMPNMLRIMASLVLARKHTTCCSL  
EPI\_ISL\_424224 -----  
EPI\_ISL\_424255 -----  
EPI\_ISL\_425501 -----  
EPI\_ISL\_425502 -----  
EPI\_ISL\_425504 -----  
EPI\_ISL\_425523 -----  
EPI\_ISL\_425535 -----  
EPI\_ISL\_425537 -----  
EPI\_ISL\_425549 -----  
EPI\_ISL\_425551 -----  
EPI\_ISL\_425562 -----  
EPI\_ISL\_425576 -----  
EPI\_ISL\_425586 -----  
EPI\_ISL\_425587 -----  
EPI\_ISL\_426817 -----  
EPI\_ISL\_426832 -----

ORF1ab 5041 SHRFYRLANECAQVLSEMVMCGGSLYVKPGGTSSGDATTAYANSVFNICQAVTANVNALL  
EPI\_ISL\_424224 -----  
EPI\_ISL\_424255 -----  
EPI\_ISL\_425501 -----  
EPI\_ISL\_425502 -----  
EPI\_ISL\_425504 -----  
EPI\_ISL\_425523 -----  
EPI\_ISL\_425535 -----  
EPI\_ISL\_425537 -----  
EPI\_ISL\_425549 -----  
EPI\_ISL\_425551 -----  
EPI\_ISL\_425562 -----  
EPI\_ISL\_425576 -----  
EPI\_ISL\_425586 -----  
EPI\_ISL\_425587 -----  
EPI\_ISL\_426817 -----  
EPI\_ISL\_426832 -----

ORF1ab 5101 STDGNKIADKYVRNLQHRLYECLYRNRDVTDFVNEFYAYLRKHFSMMILSDDAVVCFNS  
EPI\_ISL\_424224 -----  
EPI\_ISL\_424255 -----  
EPI\_ISL\_425501 -----  
EPI\_ISL\_425502 -----  
EPI\_ISL\_425504 -----  
EPI\_ISL\_425523 -----  
EPI\_ISL\_425535 -----  
EPI\_ISL\_425537 -----  
EPI\_ISL\_425549 -----  
EPI\_ISL\_425551 -----  
EPI\_ISL\_425562 -----  
EPI\_ISL\_425576 -----  
EPI\_ISL\_425586 -----  
EPI\_ISL\_425587 -----  
EPI\_ISL\_426817 -----  
EPI\_ISL\_426832 -----

ORF1ab 5161 TYASQGLVASIKNFKSVLYYQNNVFMSEAKCWTETDLTKGPHEFCSQHTMLVKQGDDYVY  
EPI\_ISL\_424224 -----  
EPI\_ISL\_424255 -----  
EPI\_ISL\_425501 -----  
EPI\_ISL\_425502 -----  
EPI\_ISL\_425504 -----  
EPI\_ISL\_425523 -----  
EPI\_ISL\_425535 -----  
EPI\_ISL\_425537 -----  
EPI\_ISL\_425549 -----  
EPI\_ISL\_425551 -----  
EPI\_ISL\_425562 -----  
EPI\_ISL\_425576 -----  
EPI\_ISL\_425586 -----  
EPI\_ISL\_425587 -----  
EPI\_ISL\_426817 -----  
EPI\_ISL\_426832 -----

ORF1ab 5221 LPYPDPSRILGAGCFVDDIVKTDGTLMIERFVSLAIDAYPLTKHPNQEYADVFLYLQYI  
EPI\_ISL\_424224 -----  
EPI\_ISL\_424255 -----  
EPI\_ISL\_425501 -----  
EPI\_ISL\_425502 -----  
EPI\_ISL\_425504 -----  
EPI\_ISL\_425523 -----  
EPI\_ISL\_425535 -----  
EPI\_ISL\_425537 -----

EPI\_ISL\_425549  
EPI\_ISL\_425551  
EPI\_ISL\_425562  
EPI\_ISL\_425576  
EPI\_ISL\_425586  
EPI\_ISL\_425587  
EPI\_ISL\_426817  
EPI\_ISL\_426832

-----  
-----  
-----  
-----  
-----  
-----  
-----  
-----

ORF1ab 5281 RKLHDELGTGHMLDMYSVMLTNDNTSRYWEPEFYEAMYTPHTVLQAVGACVLCNSQTSRLRC  
EPI\_ISL\_424224 -----  
EPI\_ISL\_424255 -----  
EPI\_ISL\_425501 -----  
EPI\_ISL\_425502 -----  
EPI\_ISL\_425504 -----  
EPI\_ISL\_425523 -----  
EPI\_ISL\_425535 -----  
EPI\_ISL\_425537 -----  
EPI\_ISL\_425549 -----  
EPI\_ISL\_425551 -----  
EPI\_ISL\_425562 -----  
EPI\_ISL\_425576 -----  
EPI\_ISL\_425586 -----  
EPI\_ISL\_425587 -----  
EPI\_ISL\_426817 -----  
EPI\_ISL\_426832 -----

ORF1ab 5341 GACIRRPFLCCKCCYDHVISTSHKLVLVSNPYVCNAPGCDVTDVDTQLYLGGMSSYYCKSHK  
EPI\_ISL\_424224 -----  
EPI\_ISL\_424255 -----  
EPI\_ISL\_425501 -----  
EPI\_ISL\_425502 -----  
EPI\_ISL\_425504 -----  
EPI\_ISL\_425523 -----  
EPI\_ISL\_425535 -----  
EPI\_ISL\_425537 -----  
EPI\_ISL\_425549 -----  
EPI\_ISL\_425551 -----  
EPI\_ISL\_425562 -----  
EPI\_ISL\_425576 -----  
EPI\_ISL\_425586 -----  
EPI\_ISL\_425587 -----  
EPI\_ISL\_426817 -----  
EPI\_ISL\_426832 -----

ORF1ab 5401 PPISFPLCANGQVFGLYKNTCVGSDNVTDNFNAIATCDWTNAGDYILANTCTERLKLFAAE  
EPI\_ISL\_424224 -----  
EPI\_ISL\_424255 -----  
EPI\_ISL\_425501 -----  
EPI\_ISL\_425502 -----  
EPI\_ISL\_425504 -----  
EPI\_ISL\_425523 -----  
EPI\_ISL\_425535 -----  
EPI\_ISL\_425537 -----  
EPI\_ISL\_425549 -----  
EPI\_ISL\_425551 -----  
EPI\_ISL\_425562 -----  
EPI\_ISL\_425576 -----  
EPI\_ISL\_425586 -----  
EPI\_ISL\_425587 -----  
EPI\_ISL\_426817 -----  
EPI\_ISL\_426832 -----

ORF1ab 5461 TLKATEETFKLSYGIATVREVLSDRELHLSWEVKGKPRPPLNRNYVFTGYRVTKNSKVQIG  
EPI\_ISL\_424224 -----  
EPI\_ISL\_424255 -----  
EPI\_ISL\_425501 -----  
EPI\_ISL\_425502 -----  
EPI\_ISL\_425504 -----  
EPI\_ISL\_425523 -----  
EPI\_ISL\_425535 -----  
EPI\_ISL\_425537 -----  
EPI\_ISL\_425549 -----  
EPI\_ISL\_425551 -----  
EPI\_ISL\_425562 -----  
EPI\_ISL\_425576 -----  
EPI\_ISL\_425586 -----  
EPI\_ISL\_425587 -----  
EPI\_ISL\_426817 -----  
EPI\_ISL\_426832 -----

ORF1ab 5521 EYTFEKGDYGDVVYRGTTTTYKLVNGDYFVLTSHTVMPLSAPTLVLPQEHYVRLITGLYPTL  
EPI\_ISL\_424224 -----  
EPI\_ISL\_424255 -----  
EPI\_ISL\_425501 -----  
EPI\_ISL\_425502 -----  
EPI\_ISL\_425504 -----  
EPI\_ISL\_425523 -----  
EPI\_ISL\_425535 -----  
EPI\_ISL\_425537 -----  
EPI\_ISL\_425549 -----  
EPI\_ISL\_425551 -----  
EPI\_ISL\_425562 -----  
EPI\_ISL\_425576 -----  
EPI\_ISL\_425586 -----  
EPI\_ISL\_425587 -----  
EPI\_ISL\_426817 -----  
EPI\_ISL\_426832 -----

ORF1ab 5581 NISDEFSSNVANYQKVGMOQKYSTLQGGPGTGKSHFAIGLALYYPSARIVYTACSHAAVDA  
EPI\_ISL\_424224 -----  
EPI\_ISL\_424255 -----  
EPI\_ISL\_425501 -----  
EPI\_ISL\_425502 -----  
EPI\_ISL\_425504 -----  
EPI\_ISL\_425523 -----  
EPI\_ISL\_425535 -----  
EPI\_ISL\_425537 -----  
EPI\_ISL\_425549 -----  
EPI\_ISL\_425551 -----  
EPI\_ISL\_425562 -----  
EPI\_ISL\_425576 -----  
EPI\_ISL\_425586 -----  
EPI\_ISL\_425587 -----  
EPI\_ISL\_426817 -----  
EPI\_ISL\_426832 -----

ORF1ab 5641 LCEKALKYLPIDKCSRIIPARARVECFDKFKVNSTLEQYVFCTVNALPETTADIVVFDEI  
EPI\_ISL\_424224 -----  
EPI\_ISL\_424255 -----  
EPI\_ISL\_425501 -----  
EPI\_ISL\_425502 -----  
EPI\_ISL\_425504 -----  
EPI\_ISL\_425523 -----  
EPI\_ISL\_425535 -----  
EPI\_ISL\_425537 -----

EPI\_ISL\_425549  
EPI\_ISL\_425551  
EPI\_ISL\_425562  
EPI\_ISL\_425576  
EPI\_ISL\_425586  
EPI\_ISL\_425587  
EPI\_ISL\_426817  
EPI\_ISL\_426832

-----  
-----  
-----  
-----  
-----  
-----  
-----  
-----

ORF1ab 5701 SMATNYDLSVVNARLRKHYVYIGDPAQLPAPRTLLTKGTLEPEYFNSVCRLMKTIGPDM  
EPI\_ISL\_424224 -----  
EPI\_ISL\_424255 -----  
EPI\_ISL\_425501 -----  
EPI\_ISL\_425502 -----  
EPI\_ISL\_425504 -----  
EPI\_ISL\_425523 -----  
EPI\_ISL\_425535 -----  
EPI\_ISL\_425537 -----  
EPI\_ISL\_425549 -----  
EPI\_ISL\_425551 -----  
EPI\_ISL\_425562 -----  
EPI\_ISL\_425576 -----  
EPI\_ISL\_425586 -----  
EPI\_ISL\_425587 -----  
EPI\_ISL\_426817 -----  
EPI\_ISL\_426832 -----

ORF1ab 5761 FLGTCRRCPAEIVDTVSALVYDNKCLKAHKDKSAQCCKMFYKGVITHDVSSAINRPQIGVV  
EPI\_ISL\_424224 -----  
EPI\_ISL\_424255 -----  
EPI\_ISL\_425501 -----  
EPI\_ISL\_425502 -----  
EPI\_ISL\_425504 -----  
EPI\_ISL\_425523 -----  
EPI\_ISL\_425535 -----  
EPI\_ISL\_425537 -----  
EPI\_ISL\_425549 -----  
EPI\_ISL\_425551 -----  
EPI\_ISL\_425562 -----  
EPI\_ISL\_425576 -----  
EPI\_ISL\_425586 -----  
EPI\_ISL\_425587 -----  
EPI\_ISL\_426817 -----  
EPI\_ISL\_426832 -----

ORF1ab 5821 REFLTRNPAWRKAVFISPYN SQNAVASKILGLPTQTV DSSQ GSEYDYVIFTQT TETAHSC  
EPI\_ISL\_424224 -----  
EPI\_ISL\_424255 -----  
EPI\_ISL\_425501 -----  
EPI\_ISL\_425502 -----  
EPI\_ISL\_425504 -----  
EPI\_ISL\_425523 -----  
EPI\_ISL\_425535 -----  
EPI\_ISL\_425537 -----  
EPI\_ISL\_425549 -----  
EPI\_ISL\_425551 -----  
EPI\_ISL\_425562 -----  
EPI\_ISL\_425576 -----  
EPI\_ISL\_425586 -----  
EPI\_ISL\_425587 -----  
EPI\_ISL\_426817 -----  
EPI\_ISL\_426832 -----



ORF1ab 5881 NVNRFNVAITRAKVGILCIMSDDRDLYDKLQFTSLEIPRRNVATLQAENVVTGLFKDCSKVI  
EPI\_ISL\_424224 -----  
EPI\_ISL\_424255 -----  
EPI\_ISL\_425501 -----  
EPI\_ISL\_425502 -----  
EPI\_ISL\_425504 -----  
EPI\_ISL\_425523 -----  
EPI\_ISL\_425535 -----  
EPI\_ISL\_425537 -----  
EPI\_ISL\_425549 -----  
EPI\_ISL\_425551 -----  
EPI\_ISL\_425562 -----  
EPI\_ISL\_425576 -----  
EPI\_ISL\_425586 -----  
EPI\_ISL\_425587 -----  
EPI\_ISL\_426817 -----  
EPI\_ISL\_426832 -----

ORF1ab 5941 TGLHPTQAPTHLSVDTKFKTEGLCVDIPGIPKDMTYRRLISMMGFKMNYQVNGYPNMFIT  
EPI\_ISL\_424224 -----  
EPI\_ISL\_424255 -----  
EPI\_ISL\_425501 -----  
EPI\_ISL\_425502 -----  
EPI\_ISL\_425504 -----  
EPI\_ISL\_425523 -----  
EPI\_ISL\_425535 -----  
EPI\_ISL\_425537 -----  
EPI\_ISL\_425549 -----  
EPI\_ISL\_425551 -----  
EPI\_ISL\_425562 -----  
EPI\_ISL\_425576 -----  
EPI\_ISL\_425586 -----  
EPI\_ISL\_425587 -----  
EPI\_ISL\_426817 -----  
EPI\_ISL\_426832 -----

ORF1ab 6001 REEAIRHVRAWIGFDVEGCHATREAVGTNLPLQLGFSTGVNLVAVPTGYVDTPNNTDFSR  
EPI\_ISL\_424224 -----  
EPI\_ISL\_424255 -----  
EPI\_ISL\_425501 -----  
EPI\_ISL\_425502 -----  
EPI\_ISL\_425504 -----  
EPI\_ISL\_425523 -----  
EPI\_ISL\_425535 -----  
EPI\_ISL\_425537 -----  
EPI\_ISL\_425549 -----  
EPI\_ISL\_425551 -----  
EPI\_ISL\_425562 -----  
EPI\_ISL\_425576 -----  
EPI\_ISL\_425586 -----  
EPI\_ISL\_425587 -----  
EPI\_ISL\_426817 -----  
EPI\_ISL\_426832 -----

ORF1ab 6061 VSAKPPPGDQFKHLIPLMYKGLPWNVVRKIVQMLSDTLKNLSDRVVFVLWAHGFELTSM  
EPI\_ISL\_424224 -----  
EPI\_ISL\_424255 -----  
EPI\_ISL\_425501 -----  
EPI\_ISL\_425502 -----  
EPI\_ISL\_425504 -----  
EPI\_ISL\_425523 -----  
EPI\_ISL\_425535 -----  
EPI\_ISL\_425537 -----

EPI\_ISL\_425549  
EPI\_ISL\_425551  
EPI\_ISL\_425562  
EPI\_ISL\_425576  
EPI\_ISL\_425586  
EPI\_ISL\_425587  
EPI\_ISL\_426817  
EPI\_ISL\_426832

-----  
-----  
-----  
-----  
-----  
-----  
-----  
-----

ORF1ab 6121 KYFVKIGPERTCCLCDRRATCFSTASDTYACWHHSIGFDYVYNPFMIDVQQWGFTGNLQS  
EPI\_ISL\_424224 -----  
EPI\_ISL\_424255 -----  
EPI\_ISL\_425501 -----  
EPI\_ISL\_425502 -----  
EPI\_ISL\_425504 -----  
EPI\_ISL\_425523 -----  
EPI\_ISL\_425535 -----  
EPI\_ISL\_425537 -----  
EPI\_ISL\_425549 -----  
EPI\_ISL\_425551 -----  
EPI\_ISL\_425562 -----  
EPI\_ISL\_425576 -----  
EPI\_ISL\_425586 -----  
EPI\_ISL\_425587 -----  
EPI\_ISL\_426817 -----  
EPI\_ISL\_426832 -----

ORF1ab 6181 NHDLYCQVHGNAHVASCDAIMTRCLAVHECFVKRVDWTIEYPIIGDELKINAACRKVQHM  
EPI\_ISL\_424224 -----  
EPI\_ISL\_424255 -----  
EPI\_ISL\_425501 -----  
EPI\_ISL\_425502 -----  
EPI\_ISL\_425504 -----  
EPI\_ISL\_425523 -----  
EPI\_ISL\_425535 -----  
EPI\_ISL\_425537 -----  
EPI\_ISL\_425549 -----  
EPI\_ISL\_425551 -----  
EPI\_ISL\_425562 -----  
EPI\_ISL\_425576 -----  
EPI\_ISL\_425586 -----  
EPI\_ISL\_425587 -----  
EPI\_ISL\_426817 -----  
EPI\_ISL\_426832 -----

ORF1ab 6241 VVKAALLADKFPVLHDIGNPKAIKCVQADVEWKFYDAQPCSDKAYKIEELFYSYATHSD  
EPI\_ISL\_424224 -----  
EPI\_ISL\_424255 -----  
EPI\_ISL\_425501 -----  
EPI\_ISL\_425502 -----  
EPI\_ISL\_425504 -----  
EPI\_ISL\_425523 -----  
EPI\_ISL\_425535 -----  
EPI\_ISL\_425537 -----  
EPI\_ISL\_425549 -----  
EPI\_ISL\_425551 -----  
EPI\_ISL\_425562 -----  
EPI\_ISL\_425576 -----  
EPI\_ISL\_425586 -----  
EPI\_ISL\_425587 -----  
EPI\_ISL\_426817 -----  
EPI\_ISL\_426832 -----

ORF1ab 6301 KFTDGVCLFWNCNVDRYPANSIVCRFDTRVLSNLNLPGCDGGSLYVKNHAFHTPAFDKSA  
EPI\_ISL\_424224 -----  
EPI\_ISL\_424255 -----  
EPI\_ISL\_425501 -----  
EPI\_ISL\_425502 -----  
EPI\_ISL\_425504 -----  
EPI\_ISL\_425523 -----  
EPI\_ISL\_425535 -----  
EPI\_ISL\_425537 -----  
EPI\_ISL\_425549 -----  
EPI\_ISL\_425551 -----  
EPI\_ISL\_425562 -----  
EPI\_ISL\_425576 -----  
EPI\_ISL\_425586 -----  
EPI\_ISL\_425587 -----  
EPI\_ISL\_426817 -----  
EPI\_ISL\_426832 -----

ORF1ab 6361 FVNLKQLPFFYYSDSPCESHGKQVVSDDIDYVPLKSATCITRCNLGGAVCRHHANEYRLYL  
EPI\_ISL\_424224 -----  
EPI\_ISL\_424255 -----  
EPI\_ISL\_425501 -----  
EPI\_ISL\_425502 -----  
EPI\_ISL\_425504 -----  
EPI\_ISL\_425523 -----  
EPI\_ISL\_425535 -----  
EPI\_ISL\_425537 -----  
EPI\_ISL\_425549 -----  
EPI\_ISL\_425551 -----  
EPI\_ISL\_425562 -----  
EPI\_ISL\_425576 -----  
EPI\_ISL\_425586 -----  
EPI\_ISL\_425587 -----  
EPI\_ISL\_426817 -----  
EPI\_ISL\_426832 -----

ORF1ab 6421 DAYNMMISAGFSLWVYKQFDTYNLWNTFTRLQSLNVAFNVVNKGHFDGQQGEVPSIIN  
EPI\_ISL\_424224 -----  
EPI\_ISL\_424255 -----  
EPI\_ISL\_425501 -----  
EPI\_ISL\_425502 -----  
EPI\_ISL\_425504 -----  
EPI\_ISL\_425523 -----  
EPI\_ISL\_425535 -----  
EPI\_ISL\_425537 -----  
EPI\_ISL\_425549 -----  
EPI\_ISL\_425551 -----  
EPI\_ISL\_425562 -----  
EPI\_ISL\_425576 -----  
EPI\_ISL\_425586 -----  
EPI\_ISL\_425587 -----  
EPI\_ISL\_426817 -----  
EPI\_ISL\_426832 -----

ORF1ab 6481 NTVYTKVDGVDVELFENKTTLPVNVAFELWAKRNIKPVPEVKILNNLGVDAANTVIWDY  
EPI\_ISL\_424224 -----  
EPI\_ISL\_424255 -----  
EPI\_ISL\_425501 -----  
EPI\_ISL\_425502 -----  
EPI\_ISL\_425504 -----  
EPI\_ISL\_425523 -----  
EPI\_ISL\_425535 -----  
EPI\_ISL\_425537 -----

EPI\_ISL\_425549  
EPI\_ISL\_425551  
EPI\_ISL\_425562  
EPI\_ISL\_425576  
EPI\_ISL\_425586  
EPI\_ISL\_425587  
EPI\_ISL\_426817  
EPI\_ISL\_426832

-----  
-----  
-----  
-----  
-----  
-----  
-----  
-----

ORF1ab 6541 KRDA PAHISTIGVCSMTDI AKKPTETICAPLTVFFDGRVDGQVDLFRNARNGVLITEGSV  
EPI\_ISL\_424224 -----  
EPI\_ISL\_424255 -----  
EPI\_ISL\_425501 -----  
EPI\_ISL\_425502 -----  
EPI\_ISL\_425504 -----  
EPI\_ISL\_425523 -----  
EPI\_ISL\_425535 -----  
EPI\_ISL\_425537 -----  
EPI\_ISL\_425549 -----  
EPI\_ISL\_425551 -----  
EPI\_ISL\_425562 -----  
EPI\_ISL\_425576 -----  
EPI\_ISL\_425586 -----  
EPI\_ISL\_425587 -----  
EPI\_ISL\_426817 -----  
EPI\_ISL\_426832 -----

ORF1ab 6601 KGLQPSVGPQASLNGVTLIGEAVKTQFNYYKKVDG VVQQLPETYFTQSRNLQEFKPRSQ  
EPI\_ISL\_424224 -----  
EPI\_ISL\_424255 -----  
EPI\_ISL\_425501 -----  
EPI\_ISL\_425502 -----  
EPI\_ISL\_425504 -----  
EPI\_ISL\_425523 -----  
EPI\_ISL\_425535 -----  
EPI\_ISL\_425537 -----  
EPI\_ISL\_425549 -----  
EPI\_ISL\_425551 -----  
EPI\_ISL\_425562 -----  
EPI\_ISL\_425576 -----  
EPI\_ISL\_425586 -----  
EPI\_ISL\_425587 -----  
EPI\_ISL\_426817 -----  
EPI\_ISL\_426832 -----

ORF1ab 6661 MEIDFLELAMDEFIERYKLEGYAFEHIVYGDFSHSQLGGLHLLIGLAKRFKESPFEELEDF  
EPI\_ISL\_424224 -----  
EPI\_ISL\_424255 -----  
EPI\_ISL\_425501 -----  
EPI\_ISL\_425502 -----  
EPI\_ISL\_425504 -----  
EPI\_ISL\_425523 -----  
EPI\_ISL\_425535 -----  
EPI\_ISL\_425537 -----  
EPI\_ISL\_425549 -----  
EPI\_ISL\_425551 -----  
EPI\_ISL\_425562 -----  
EPI\_ISL\_425576 -----  
EPI\_ISL\_425586 -----  
EPI\_ISL\_425587 -----  
EPI\_ISL\_426817 -----  
EPI\_ISL\_426832 -----

ORF1ab 6721 IPMDSTVKNYFITDAQTGSSKCVCSVIDLLDDDFVEI IKSQDLSVSVKVVKVTIDYTEIS  
EPI\_ISL\_424224 -----  
EPI\_ISL\_424255 -----  
EPI\_ISL\_425501 -----  
EPI\_ISL\_425502 -----  
EPI\_ISL\_425504 -----  
EPI\_ISL\_425523 -----  
EPI\_ISL\_425535 -----  
EPI\_ISL\_425537 -----  
EPI\_ISL\_425549 -----  
EPI\_ISL\_425551 -----  
EPI\_ISL\_425562 -----  
EPI\_ISL\_425576 -----  
EPI\_ISL\_425586 -----  
EPI\_ISL\_425587 -----  
EPI\_ISL\_426817 -----  
EPI\_ISL\_426832 -----

ORF1ab 6781 FMLWCKDGHVETFYPKLQSSQAWQPGVAMPNLYKMQRMLLEKCDLQNYGDSATLPKGIMM  
EPI\_ISL\_424224 -----  
EPI\_ISL\_424255 -----  
EPI\_ISL\_425501 -----  
EPI\_ISL\_425502 -----  
EPI\_ISL\_425504 -----  
EPI\_ISL\_425523 -----  
EPI\_ISL\_425535 -----  
EPI\_ISL\_425537 -----  
EPI\_ISL\_425549 -----  
EPI\_ISL\_425551 -----  
EPI\_ISL\_425562 -----  
EPI\_ISL\_425576 -----  
EPI\_ISL\_425586 -----  
EPI\_ISL\_425587 -----  
EPI\_ISL\_426817 -----  
EPI\_ISL\_426832 -----

ORF1ab 6841 NVAKYTQLCQYLNTLTLAVPYNMRVIHFGAGSDKGVAPGTAVLRQWLPTGTLVDSDLND  
EPI\_ISL\_424224 -----  
EPI\_ISL\_424255 -----  
EPI\_ISL\_425501 -----  
EPI\_ISL\_425502 -----  
EPI\_ISL\_425504 -----  
EPI\_ISL\_425523 -----  
EPI\_ISL\_425535 -----  
EPI\_ISL\_425537 -----  
EPI\_ISL\_425549 -----  
EPI\_ISL\_425551 -----  
EPI\_ISL\_425562 -----  
EPI\_ISL\_425576 -----  
EPI\_ISL\_425586 -----  
EPI\_ISL\_425587 -----  
EPI\_ISL\_426817 -----  
EPI\_ISL\_426832 -----

ORF1ab 6901 FVSDADSTLIGDCATVHTANKWDLIIISDMYDPKTKNVTKENDSKEGFFTYICGFIQQKLA  
EPI\_ISL\_424224 -----  
EPI\_ISL\_424255 -----  
EPI\_ISL\_425501 -----  
EPI\_ISL\_425502 -----  
EPI\_ISL\_425504 -----  
EPI\_ISL\_425523 -----  
EPI\_ISL\_425535 -----  
EPI\_ISL\_425537 -----

EPI\_ISL\_425549  
EPI\_ISL\_425551  
EPI\_ISL\_425562  
EPI\_ISL\_425576  
EPI\_ISL\_425586  
EPI\_ISL\_425587  
EPI\_ISL\_426817  
EPI\_ISL\_426832

-----  
-----  
-----  
-----  
-----  
-----  
-----  
-----



ORF1ab 6961 LGGSVAIKITEHSWNADLYKLMGHFAWWTAFVTNVNASSSEAFLLIGCNYLGKPREQIDGY  
EPI\_ISL\_424224 -----  
EPI\_ISL\_424255 -----  
EPI\_ISL\_425501 -----  
EPI\_ISL\_425502 -----  
EPI\_ISL\_425504 -----  
EPI\_ISL\_425523 -----  
EPI\_ISL\_425535 -----  
EPI\_ISL\_425537 -----  
EPI\_ISL\_425549 -----  
EPI\_ISL\_425551 -----  
EPI\_ISL\_425562 -----  
EPI\_ISL\_425576 -----  
EPI\_ISL\_425586 -----  
EPI\_ISL\_425587 -----  
EPI\_ISL\_426817 -----  
EPI\_ISL\_426832 -----

ORF1ab 7021 VMHANYIFWRNTNPIQLSSYSFLDMSKFPLKLRGTAVMSLKEGQINDMILSLLSKGRLLII  
EPI\_ISL\_424224 -----  
EPI\_ISL\_424255 -----  
EPI\_ISL\_425501 -----  
EPI\_ISL\_425502 -----  
EPI\_ISL\_425504 -----  
EPI\_ISL\_425523 -----  
EPI\_ISL\_425535 -----  
EPI\_ISL\_425537 -----  
EPI\_ISL\_425549 -----  
EPI\_ISL\_425551 -----  
EPI\_ISL\_425562 -----  
EPI\_ISL\_425576 -----  
EPI\_ISL\_425586 -----  
EPI\_ISL\_425587 -----  
EPI\_ISL\_426817 -----  
EPI\_ISL\_426832 -----

ORF1ab 7081 RENNRRVVISSDVLVNN  
EPI\_ISL\_424224 -----  
EPI\_ISL\_424255 -----  
EPI\_ISL\_425501 -----  
EPI\_ISL\_425502 -----  
EPI\_ISL\_425504 -----  
EPI\_ISL\_425523 -----  
EPI\_ISL\_425535 -----  
EPI\_ISL\_425537 -----  
EPI\_ISL\_425549 -----  
EPI\_ISL\_425551 -----  
EPI\_ISL\_425562 -----  
EPI\_ISL\_425576 -----  
EPI\_ISL\_425586 -----  
EPI\_ISL\_425587 -----  
EPI\_ISL\_426817 -----  
EPI\_ISL\_426832 -----
